# Supplementary material for: Cu-Catalyzed decarboxylative annulation of N-substituted glycines with 3-formylchromones: synthesis of functionalized chromeno[2,3-b]pyrrol-4(1H)-ones
Source: Royal Society of Chemistry journal article supplement (doi:10.1039/d2cc03816a), 2022-01-01
Supplement: d2cc03816a1.pdf [file d2cc03816a1.pdf]

# Cu-Catalyzed Decarboxylative Annulation of *N*-Substituted Glycines with 3-Formylchromones: Synthesis of Functionalized Chromeno[2,3-*b*]pyrrol-4(1*H*)-ones

Li Chen, Yuan-Da Li, Ying Lv, Zi-Han Lu, and Sheng-Jiao Yan\*

*Key Laboratory of Medicinal Chemistry for Natural Resource (Yunnan University),  
Ministry of Education, School of Chemical Science and Technology, Yunnan  
University, Kunming, 650091, P. R. China.*

## Supporting Information

### Table of Contents:

|                                                                                                                    |    |
|--------------------------------------------------------------------------------------------------------------------|----|
| General Information.....                                                                                           | 4  |
| General Procedure for the Preparation of <b>2</b> .....                                                            | 4  |
| General Procedure for the Preparation of <b>3</b> .....                                                            | 5  |
| The proposed mechanism of the cascade reaction.....                                                                | 5  |
| <b>Scheme S1.</b> The proposed mechanism of the cascade reaction.....                                              | 6  |
| Control Experiments.....                                                                                           | 7  |
| <b>Scheme S2.</b> Control experiments.....                                                                         | 7  |
| <b>Scheme S3.</b> Control experiments.....                                                                         | 8  |
| Spectroscopic Data of <b>2</b> & <b>3</b> .....                                                                    | 9  |
| X-ray Structure and Data <sup>2</sup> of <b>3d'</b> .....                                                          | 25 |
| <b>Figure S1.</b> X-Ray crystal structure of <b>3d'</b> , ellipsoids is drawn at the 30% probability level.....    | 25 |
| <b>Table S1.</b> Crystal data and structure refinement for <b>3d'</b> .....                                        | 25 |
| <b>Table S2.</b> Bond Lengths for <b>3d'</b> .....                                                                 | 26 |
| <b>Figure S2.</b> <sup>1</sup> H NMR (600 MHz, DMSO- <i>d</i> <sub>6</sub> ) spectra of compound <b>2a</b> .....   | 27 |
| <b>Figure S3.</b> <sup>13</sup> C NMR (150 MHz, DMSO- <i>d</i> <sub>6</sub> ) spectra of compound <b>2a</b> .....  | 28 |
| <b>Figure S4.</b> <sup>19</sup> F NMR (564 MHz, DMSO- <i>d</i> <sub>6</sub> ) spectra of compound <b>2a</b> .....  | 29 |
| <b>Figure S5.</b> <sup>1</sup> H NMR (600 MHz, DMSO- <i>d</i> <sub>6</sub> ) spectra of compound <b>2b</b> .....   | 30 |
| <b>Figure S6.</b> <sup>13</sup> C NMR (150 MHz, DMSO- <i>d</i> <sub>6</sub> ) spectra of compound <b>2b</b> .....  | 31 |
| <b>Figure S7.</b> <sup>1</sup> H NMR (600 MHz, DMSO- <i>d</i> <sub>6</sub> ) spectra of compound <b>2c</b> .....   | 32 |
| <b>Figure S8.</b> <sup>13</sup> C NMR (150 MHz, DMSO- <i>d</i> <sub>6</sub> ) spectra of compound <b>2c</b> .....  | 33 |
| <b>Figure S9.</b> <sup>19</sup> F NMR (564 MHz, DMSO- <i>d</i> <sub>6</sub> ) spectra of compound <b>2c</b> .....  | 34 |
| <b>Figure S10.</b> <sup>1</sup> H NMR (600 MHz, DMSO- <i>d</i> <sub>6</sub> ) spectra of compound <b>2d</b> .....  | 35 |
| <b>Figure S11.</b> <sup>13</sup> C NMR (150 MHz, DMSO- <i>d</i> <sub>6</sub> ) spectra of compound <b>2d</b> ..... | 36 |
| <b>Figure S12.</b> <sup>1</sup> H NMR (600 MHz, DMSO- <i>d</i> <sub>6</sub> ) spectra of compound <b>2f</b> .....  | 37 |
| <b>Figure S13.</b> <sup>13</sup> C NMR (150 MHz, DMSO- <i>d</i> <sub>6</sub> ) spectra of compound <b>2f</b> ..... | 38 |
| <b>Figure S14.</b> <sup>1</sup> H NMR (600 MHz, DMSO- <i>d</i> <sub>6</sub> ) spectra of compound <b>2g</b> .....  | 39 |
| <b>Figure S15.</b> <sup>13</sup> C NMR (150 MHz, DMSO- <i>d</i> <sub>6</sub> ) spectra of compound <b>2g</b> ..... | 40 |
| <b>Figure S16.</b> <sup>1</sup> H NMR (600 MHz, DMSO- <i>d</i> <sub>6</sub> ) spectra of compound <b>2h</b> .....  | 41 |
| <b>Figure S17.</b> <sup>13</sup> C NMR (150 MHz, DMSO- <i>d</i> <sub>6</sub> ) spectra of compound <b>2h</b> ..... | 42 |
| <b>Figure S18.</b> <sup>1</sup> H NMR (600 MHz, CDCl <sub>3</sub> ) spectra of compound <b>3a</b> .....            | 43 |
| <b>Figure S19.</b> <sup>13</sup> C NMR (150 MHz, CDCl <sub>3</sub> ) spectra of compound <b>3a</b> .....           | 44 |
| <b>Figure S20.</b> <sup>1</sup> H NMR (600 MHz, CDCl <sub>3</sub> ) spectra of compound <b>3b</b> .....            | 45 |
| <b>Figure S21.</b> <sup>13</sup> C NMR (150 MHz, CDCl <sub>3</sub> ) spectra of compound <b>3b</b> .....           | 46 |
| <b>Figure S22.</b> <sup>19</sup> F NMR (564 MHz, CDCl <sub>3</sub> ) spectra of compound <b>3b</b> .....           | 47 |

|                                                                                                                         |    |
|-------------------------------------------------------------------------------------------------------------------------|----|
| <b>Figure S23.</b> $^1\text{H}$ NMR (600 MHz, $\text{CDCl}_3$ ) spectra of compound <b>3c</b> .....                     | 48 |
| <b>Figure S24.</b> $^{13}\text{C}$ NMR (150 MHz, $\text{CDCl}_3$ ) spectra of compound <b>3c</b> .....                  | 49 |
| <b>Figure S25.</b> $^{19}\text{F}$ NMR (564 MHz, $\text{CDCl}_3$ ) spectra of compound <b>3c</b> .....                  | 50 |
| <b>Figure S26.</b> $^1\text{H}$ NMR (600 MHz, $\text{CDCl}_3$ ) spectra of compound <b>3d</b> .....                     | 51 |
| <b>Figure S27.</b> $^{13}\text{C}$ NMR (150 MHz, $\text{CDCl}_3$ ) spectra of compound <b>3d</b> .....                  | 52 |
| <b>Figure S28.</b> $^1\text{H}$ NMR (600 MHz, $\text{CDCl}_3$ ) spectra of compound <b>3e</b> .....                     | 53 |
| <b>Figure S29.</b> $^{13}\text{C}$ NMR (150 MHz, $\text{CDCl}_3$ ) spectra of compound <b>3e</b> .....                  | 54 |
| <b>Figure S30.</b> $^{19}\text{F}$ NMR (564 MHz, $\text{CDCl}_3$ ) spectra of compound <b>3e</b> .....                  | 55 |
| <b>Figure S31.</b> $^1\text{H}$ NMR (600 MHz, $\text{CDCl}_3$ ) spectra of compound <b>3f</b> .....                     | 56 |
| <b>Figure S32.</b> $^{13}\text{C}$ NMR (150 MHz, $\text{CDCl}_3$ ) spectra of compound <b>3f</b> .....                  | 57 |
| <b>Figure S33.</b> $^1\text{H}$ NMR (600 MHz, $\text{CDCl}_3$ ) spectra of compound <b>3g</b> .....                     | 58 |
| <b>Figure S34.</b> $^{13}\text{C}$ NMR (150 MHz, $\text{CDCl}_3$ ) spectra of compound <b>3g</b> .....                  | 59 |
| <b>Figure S35.</b> $^1\text{H}$ NMR (600 MHz, $\text{CDCl}_3$ ) spectra of compound <b>3h</b> .....                     | 60 |
| <b>Figure S36.</b> $^{13}\text{C}$ NMR (150 MHz, $\text{CDCl}_3$ ) spectra of compound <b>3h</b> .....                  | 61 |
| <b>Figure S37.</b> $^1\text{H}$ NMR (600 MHz, $\text{CDCl}_3$ ) spectra of compound <b>3i</b> .....                     | 62 |
| <b>Figure S38.</b> $^{13}\text{C}$ NMR (150 MHz, $\text{CDCl}_3$ ) spectra of compound <b>3i</b> .....                  | 63 |
| <b>Figure S39.</b> $^1\text{H}$ NMR (500 MHz, $\text{CDCl}_3$ ) spectra of compound <b>3j</b> .....                     | 64 |
| <b>Figure S40.</b> $^{13}\text{C}$ NMR (125 MHz, $\text{CDCl}_3$ ) spectra of compound <b>3j</b> .....                  | 65 |
| <b>Figure S41.</b> $^{19}\text{F}$ NMR (470 MHz, $\text{CDCl}_3$ ) spectra of compound <b>3j</b> .....                  | 66 |
| <b>Figure S42.</b> $^1\text{H}$ NMR (600 MHz, $\text{CDCl}_3$ ) spectra of compound <b>3k</b> .....                     | 67 |
| <b>Figure S43.</b> $^{13}\text{C}$ NMR (150 MHz, $\text{CDCl}_3$ ) spectra of compound <b>3k</b> .....                  | 68 |
| <b>Figure S44.</b> $^{19}\text{F}$ NMR (564 MHz, $\text{CDCl}_3$ ) spectra of compound <b>3k</b> .....                  | 69 |
| <b>Figure S45.</b> $^1\text{H}$ NMR (600 MHz, $\text{CDCl}_3$ ) spectra of compound <b>3l</b> .....                     | 70 |
| <b>Figure S46.</b> $^{13}\text{C}$ NMR (150 MHz, $\text{CDCl}_3$ ) spectra of compound <b>3l</b> .....                  | 71 |
| <b>Figure S47.</b> $^{19}\text{F}$ NMR (564 MHz, $\text{CDCl}_3$ ) spectra of compound <b>3l</b> .....                  | 72 |
| <b>Figure S48.</b> $^1\text{H}$ NMR (500 MHz, $\text{CDCl}_3$ ) spectra of compound <b>3m</b> .....                     | 73 |
| <b>Figure S49.</b> $^{13}\text{C}$ NMR (150 MHz, $\text{CDCl}_3$ ) spectra of compound <b>3m</b> .....                  | 74 |
| <b>Figure S50.</b> $^{19}\text{F}$ NMR (564 MHz, $\text{CDCl}_3$ ) spectra of compound <b>3m</b> .....                  | 75 |
| <b>Figure S51.</b> $^1\text{H}$ NMR (600 MHz, $\text{CDCl}_3$ ) spectra of compound <b>3n</b> .....                     | 76 |
| <b>Figure S52.</b> $^{13}\text{C}$ NMR (150 MHz, $\text{CDCl}_3$ ) spectra of compound <b>3n</b> .....                  | 77 |
| <b>Figure S53.</b> $^1\text{H}$ NMR (600 MHz, $\text{CDCl}_3$ ) spectra of compound <b>3o</b> .....                     | 78 |
| <b>Figure S54.</b> $^{13}\text{C}$ NMR (150 MHz, $\text{CDCl}_3$ ) spectra of compound <b>3o</b> .....                  | 79 |
| <b>Figure S55.</b> $^1\text{H}$ NMR (600 MHz, $\text{CDCl}_3$ ) spectra of compound <b>3p</b> .....                     | 80 |
| <b>Figure S56.</b> $^{13}\text{C}$ NMR (150 MHz, $\text{CDCl}_3$ ) spectra of compound <b>3p</b> .....                  | 81 |
| <b>Figure S57.</b> $^1\text{H}$ NMR (600 MHz, $\text{CDCl}_3$ + Acetone- $d_6$ ) spectra of compound <b>3q</b> .....    | 82 |
| <b>Figure S58.</b> $^{13}\text{C}$ NMR (150 MHz, $\text{CDCl}_3$ + Acetone- $d_6$ ) spectra of compound <b>3q</b> ..... | 83 |
| <b>Figure S59.</b> $^{19}\text{F}$ NMR (564 MHz, $\text{CDCl}_3$ + Acetone- $d_6$ ) spectra of compound <b>3q</b> ..... | 84 |
| <b>Figure S60.</b> $^1\text{H}$ NMR (600 MHz, $\text{CDCl}_3$ ) spectra of compound <b>3r</b> .....                     | 85 |
| <b>Figure S61.</b> $^{13}\text{C}$ NMR (150 MHz, $\text{CDCl}_3$ ) spectra of compound <b>3r</b> .....                  | 86 |
| <b>Figure S62.</b> $^1\text{H}$ NMR (600 MHz, $\text{CDCl}_3$ ) spectra of compound <b>3s</b> .....                     | 87 |
| <b>Figure S63.</b> $^{13}\text{C}$ NMR (150 MHz, $\text{CDCl}_3$ ) spectra of compound <b>3s</b> .....                  | 88 |
| <b>Figure S64.</b> $^1\text{H}$ NMR (600 MHz, Acetone- $d_6$ ) spectra of compound <b>3t</b> .....                      | 89 |
| <b>Figure S65.</b> $^{13}\text{C}$ NMR (150 MHz, Acetone- $d_6$ ) spectra of compound <b>3t</b> .....                   | 90 |
| <b>Figure S66.</b> $^1\text{H}$ NMR (600 MHz, $\text{CDCl}_3$ ) spectra of compound <b>3u</b> .....                     | 91 |
| <b>Figure S67.</b> $^{13}\text{C}$ NMR (150 MHz, $\text{CDCl}_3$ ) spectra of compound <b>3u</b> .....                  | 92 |
| <b>Figure S68.</b> $^1\text{H}$ NMR (600 MHz, $\text{CDCl}_3$ ) spectra of compound <b>3v</b> .....                     | 93 |
| <b>Figure S69.</b> $^{13}\text{C}$ NMR (150 MHz, $\text{CDCl}_3$ ) spectra of compound <b>3v</b> .....                  | 94 |
| <b>Figure S70.</b> $^1\text{H}$ NMR (600 MHz, $\text{CDCl}_3$ +DMSO- $d_6$ ) spectra of compound <b>3w</b> .....        | 95 |

|                                                                                                                        |     |
|------------------------------------------------------------------------------------------------------------------------|-----|
| <b>Figure S71.</b> $^{13}\text{C}$ NMR (150 MHz, $\text{CDCl}_3+\text{DMSO-}d_6$ ) spectra of compound <b>3w</b> ..... | 96  |
| <b>Figure S72.</b> $^1\text{H}$ NMR (500 MHz, $\text{CDCl}_3$ ) spectra of compound <b>3x</b> .....                    | 97  |
| <b>Figure S73.</b> $^{13}\text{C}$ NMR (150 MHz, $\text{CDCl}_3$ ) spectra of compound <b>3x</b> .....                 | 98  |
| <b>Figure S74.</b> $^1\text{H}$ NMR (600 MHz, $\text{CDCl}_3$ ) spectra of compound <b>3y</b> .....                    | 99  |
| <b>Figure S75.</b> $^{13}\text{C}$ NMR (150 MHz, $\text{CDCl}_3$ ) spectra of compound <b>3y</b> .....                 | 100 |
| <b>Figure S76.</b> $^1\text{H}$ NMR (600 MHz, $\text{CDCl}_3$ ) spectra of compound <b>3z</b> .....                    | 101 |
| <b>Figure S77.</b> $^{13}\text{C}$ NMR (150 MHz, $\text{CDCl}_3$ ) spectra of compound <b>3z</b> .....                 | 102 |
| <b>Figure S78.</b> $^1\text{H}$ NMR (600 MHz, $\text{CDCl}_3$ ) spectra of compound <b>3a'</b> .....                   | 103 |
| <b>Figure S79.</b> $^{13}\text{C}$ NMR (150 MHz, $\text{CDCl}_3$ ) spectra of compound <b>3a'</b> .....                | 104 |
| <b>Figure S80.</b> $^1\text{H}$ NMR (600 MHz, $\text{CDCl}_3$ ) spectra of compound <b>3b'</b> .....                   | 105 |
| <b>Figure S81.</b> $^{13}\text{C}$ NMR (150 MHz, $\text{CDCl}_3$ ) spectra of compound <b>3b'</b> .....                | 106 |
| <b>Figure S82.</b> $^1\text{H}$ NMR (600 MHz, $\text{CDCl}_3$ ) spectra of compound <b>3c'</b> .....                   | 107 |
| <b>Figure S83.</b> $^{13}\text{C}$ NMR (150 MHz, $\text{CDCl}_3$ ) spectra of compound <b>3c'</b> .....                | 108 |
| <b>Figure S84.</b> $^{19}\text{F}$ NMR (564 MHz, $\text{CDCl}_3$ ) spectra of compound <b>3c'</b> .....                | 109 |
| <b>Figure S85.</b> $^1\text{H}$ NMR (600 MHz, $\text{CDCl}_3$ ) spectra of compound <b>3d'</b> .....                   | 110 |
| <b>Figure S86.</b> $^{13}\text{C}$ NMR (150 MHz, $\text{CDCl}_3$ ) spectra of compound <b>3d'</b> .....                | 111 |
| <b>Figure S87.</b> $^1\text{H}$ NMR (600 MHz, $\text{CDCl}_3$ ) spectra of compound <b>3e'</b> .....                   | 112 |
| <b>Figure S88.</b> $^{13}\text{C}$ NMR (150 MHz, $\text{CDCl}_3$ ) spectra of compound <b>3e'</b> .....                | 113 |
| <b>Figure S89.</b> $^1\text{H}$ NMR (500 MHz, $\text{CDCl}_3$ ) spectra of compound <b>3f'</b> .....                   | 114 |
| <b>Figure S90.</b> $^{13}\text{C}$ NMR (150 MHz, $\text{CDCl}_3$ ) spectra of compound <b>3f'</b> .....                | 115 |
| <b>Figure S91.</b> $^1\text{H}$ NMR (600 MHz, $\text{CDCl}_3$ ) spectra of compound <b>3g'</b> .....                   | 116 |
| <b>Figure S92.</b> $^{13}\text{C}$ NMR (150 MHz, $\text{CDCl}_3$ ) spectra of compound <b>3g'</b> .....                | 117 |
| <b>Figure S93.</b> $^{19}\text{F}$ NMR (564 MHz, $\text{CDCl}_3$ ) spectra of compound <b>3g'</b> .....                | 118 |
| <b>Figure S94.</b> $^1\text{H}$ NMR (500 MHz, $\text{CDCl}_3$ ) spectra of compound <b>3h'</b> .....                   | 119 |
| <b>Figure S95.</b> $^{13}\text{C}$ NMR (125 MHz, $\text{CDCl}_3$ ) spectra of compound <b>3h'</b> .....                | 120 |
| <b>Figure S96.</b> $^1\text{H}$ NMR (500 MHz, $\text{CDCl}_3$ ) spectra of compound <b>3i'</b> .....                   | 121 |
| <b>Figure S97.</b> $^{13}\text{C}$ NMR (125 MHz, $\text{CDCl}_3$ ) spectra of compound <b>3i'</b> .....                | 122 |
| <b>Figure S98.</b> $^1\text{H}$ NMR (500 MHz, $\text{CDCl}_3$ ) spectra of compound <b>3j'</b> .....                   | 123 |
| <b>Figure S99.</b> $^{13}\text{C}$ NMR (125 MHz, $\text{CDCl}_3$ ) spectra of compound <b>3j'</b> .....                | 124 |
| <b>Figure S100.</b> HPLC of the reaction mixture.....                                                                  | 125 |
| <b>Figure S101.</b> HRMS of intermediate <b>1d</b> .....                                                               | 126 |
| <b>Figure S102.</b> HRMS of intermediate <b>2e</b> .....                                                               | 127 |
| <b>Figure S103.</b> HRMS of intermediate <b>4t</b> .....                                                               | 128 |
| <b>Figure S104.</b> HRMS of intermediate <b>7t</b> .....                                                               | 129 |
| <b>Figure S105.</b> HRMS of intermediate <b>8t/9t</b> .....                                                            | 130 |
| <b>Figure S106.</b> HRMS of intermediate <b>11t</b> .....                                                              | 131 |
| <b>Figure S107.</b> HRMS of compound <b>3t</b> .....                                                                   | 132 |
| <b>Figure S108.</b> HPLC of the reaction mixture.....                                                                  | 133 |
| <b>Figure S109.</b> HRMS of intermediate <b>5t-TEMPO/6t-TEMPO</b> .....                                                | 134 |
| <b>Figure S110.</b> HRMS of intermediate <b>5t-TEMPO/6t-TEMPO</b> .....                                                | 135 |
| <b>Figure S111.</b> $^1\text{H}$ NMR (600 MHz, Acetone- $d_6$ ) spectra of intermediate <b>9g'</b> .....               | 136 |
| <b>Figure S112.</b> $^{13}\text{C}$ NMR (150 MHz, Acetone- $d_6$ ) spectra of intermediate <b>9g'</b> .....            | 137 |
| <b>Figure S113.</b> $^{19}\text{F}$ NMR (564 MHz, Acetone- $d_6$ ) spectra of intermediate <b>9g'</b> .....            | 138 |
| <b>References and Notes</b> .....                                                                                      | 139 |

## General Information

All compounds were fully characterised by spectroscopic data. The NMR spectra were recorded on a Bruker DRX600 or Bruker DRX500. Chemical shifts ( $\delta$ ) are expressed in ppm,  $J$  values are given in Hz, and deuterated  $\text{CDCl}_3$  or Acetone- $d_6$ /DMSO- $d_6$  was used as solvent. IR spectra were recorded on a FT-IR Thermo Nicolet Avatar 360 using a KBr pellet. The reactions were monitored by thin layer chromatography (TLC) using silica gel GF<sub>254</sub>. The melting points were determined on a XT-4A melting point apparatus and are uncorrected. HRMs were performed on an Agilent LC/Msd TOF instrument.

The materials were purchased from Adamas-beta Corporation Limited. All chemicals and solvents were used as received without further purification unless otherwise stated. Two kinds of reagents which were used in the experiment were commercially available reagents.

### General Procedure for the Preparation of 2<sup>1</sup>

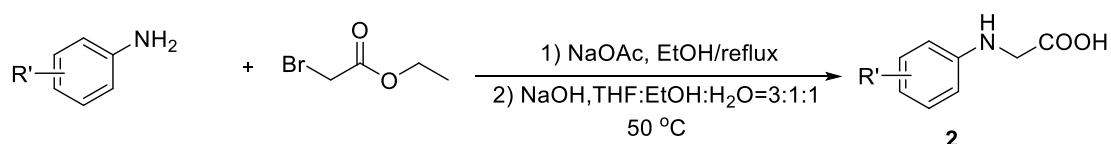

A mixture of substituted aniline (10 mmol), ethyl bromoacetate (1.2 equiv., 12 mmol) and anhydrous sodium acetate (2 equiv., 20 mmol) in 30 mL ethanol was refluxed for about 10h until the substituted aniline disappeared. After cooling to room temperature, the precipitated salts were removed by filtration. The solvent was removed by rotary evaporation. After obtaining the concentrate, NaOH (3.3 equiv., 33mmol) and the concentrate (1.0 equiv., 10mmol) were dissolved in H<sub>2</sub>O (10mL), EtOH (10mL) and THF (30mL). The reaction mixture was stirred for 3h at 50°C. The organic solvent was then removed by rotary evaporation. The residue was extracted with ethyl acetate (3×10 mL). The water layer was acidified with con. HCl until pH = 2-3 and extracted with ethyl acetate (3×20 mL). The combined organic layers were concentrated by rotary evaporation to afford product substituted *N*-phenylglycine (yields: 72-98%).

## General Procedure for the Preparation of 3

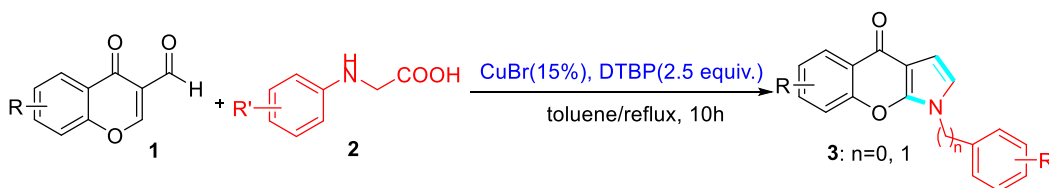

Chromone-3-carboxaldehydes **1** (0.5 mmol) was charged into a round-bottom flask. Then toluene (3 mL), N-phenylglycine **2** (0.8 mmol), CuBr (15%), and DTBP (2.5 equiv.) were added to the mixture. The mixture was stirred at reflux for approximately 8-10 hours. The mixture was cooled to room temperature. Then the reaction mixture was extracted with ethyl acetate (3×15 mL), washed with water and brine, and then dried over MgSO<sub>4</sub>. The combined organic phases were evaporated under reduced pressure to create the crude product. Finally, the products **3** were obtained in the pure form by column chromatography over silica gel using a mixture of petroleum ether/ethyl acetate (5:1-8:1, v/v) as the eluent.

### **The proposed mechanism of the cascade reaction**

The proposed mechanism is shown in Scheme 2. First, the double bond of the substrate 3-formylchromone **1d** was attacked by the amino group of N-phenylglycine **2e** via the Michael reaction to produce the intermediate **4t**. Then the intermediate **4t** oxidized by Cu (II) to lose the CO<sub>2</sub> and proton created the intermediate **5t** by the SET mechanism. The intermediate **5t** formed the intermediate **6t** through the 1,2-addition of the radical to the acyl, which formed the intermediate **7t** oxidized by DTBP. Then the intermediate **7t** lost one molecular water to form intermediate **8t**, and it went through a ring-opening reaction to produce the intermediate **9t**. Next, the allyl carbon of intermediate **8t** was oxidized by CuBr and obtained the intermediate **10t**. Finally, the intermediate **10t** formed the intermediate **11t** and lost one molecule of tertiary butyl alcohol to produce the final products **3t**.

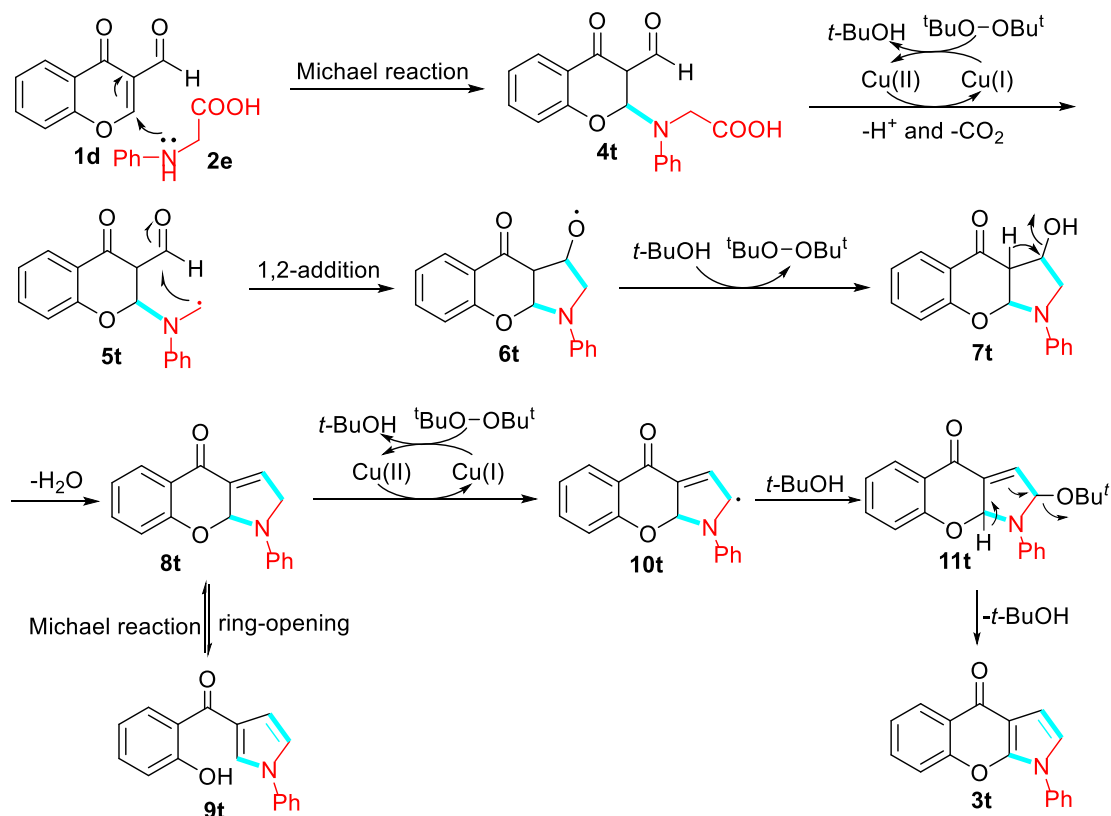

**Scheme S1. The proposed mechanism of the cascade reaction.**

Furthermore, we tried to make the mixture of **1d** (0.1 mmol), **2e** (0.16 mmol), DTBP (0.25 mmol) and CuBr (0.015 mmol) in toluene and carried out refluxing for 1 h. Following this, we immediately injected the reaction mixture into the high-pressure liquid chromatography-high-resolution mass spectrometry (HPLC-HRMS) system. Some intermediate molecular ion peaks appeared (ESI, Figures S100–S107). The molecular ion peaks that appeared in the high-resolution mass spectrum were: HRMS (TOF ES<sup>+</sup>):  $m/z$  calcd. for C<sub>10</sub>H<sub>7</sub>O<sub>3</sub> [M+H]<sup>+</sup>, 175.0390; found, 175.0385, which is the HRMS spectrum of **1d** (SI, Figure S101); HRMS (TOF ES<sup>+</sup>):  $m/z$  calcd. for C<sub>8</sub>H<sub>10</sub>NO<sub>2</sub> [M+H]<sup>+</sup>, 152.0706; found, 152.0701, which is the HRMS spectra of **2e** (SI, Figure S102); HRMS (TOF ES<sup>+</sup>):  $m/z$  calcd. for C<sub>18</sub>H<sub>16</sub>NO<sub>5</sub> [M+H]<sup>+</sup>, 326.1023; found, 326.1025, which is the HRMS spectra of intermediate **4t** (SI, Figure S103); HRMS (TOF ES<sup>+</sup>):  $m/z$  calcd. for C<sub>17</sub>H<sub>16</sub>NO<sub>3</sub> [M+H]<sup>+</sup>, 282.1125; found, 282.1115, which is the HRMS spectra of intermediate **7t** (ESI, Figure S104); HRMS (TOF ES<sup>+</sup>):  $m/z$  calcd. for C<sub>17</sub>H<sub>14</sub>NO<sub>2</sub> [M+H]<sup>+</sup>, 264.1019; found, 264.1013. There is the HRMS spectra of intermediate **8t/9t** (SI, Figure S105); HRMS (TOF ES<sup>+</sup>):  $m/z$  calcd. for C<sub>21</sub>H<sub>21</sub>NNaO<sub>3</sub> [M+Na]<sup>+</sup>, 358.1414; found, 358.1409, which is the HRMS spectrum of target compound **11t** (SI, Figure S106). HRMS (TOF ES<sup>+</sup>):  $m/z$  calcd. for C<sub>17</sub>H<sub>12</sub>NO<sub>2</sub>

$[M+H]^+$ , 262.0863; found, 262.0854, which is the HRMS spectrum of target compound **3t** (SI, Figure S107).

More importantly, the mixture of **1d** (0.1 mmol), **2e** (0.16 mmol), DTBP (0.25 mmol), TEMPO (0.1 mmol), and CuBr (0.015 mmol) in toluene and carried out refluxing for 1 h. Following this, we immediately injected the reaction mixture into the high-pressure liquid chromatography-high-resolution mass spectrometry (HPLC-HRMS) system. Some intermediate molecular ion peaks appeared (ESI, Figures S108–S110). The molecular ion peaks that appeared in the high-resolution mass spectrum were: HRMS (TOF ES<sup>+</sup>):  $m/z$  calcd. for C<sub>26</sub>H<sub>33</sub>N<sub>2</sub>O<sub>4</sub> [M+H]<sup>+</sup>, 437.2435; found, 437.2429, which is the HRMS spectrum of **5t-TEMPO/6t-TEMPO** (SI, Figure S109); HRMS (TOF ES<sup>+</sup>):  $m/z$  calcd. for C<sub>26</sub>H<sub>32</sub>N<sub>2</sub>NaO<sub>4</sub> [M+Na]<sup>+</sup>, 459.2254; found, 459.2261, which is the HRMS spectrum of **5t-TEMPO/6t-TEMPO** (SI, Figure S110).

Based on the molecular ion peaks of intermediates **4t–9t** and **11t** (ESI, Figures S100–S110) and the control experiments (ESI, Schemes S2-S3). We believe there exists ample evidence in support of the proposed mechanism.

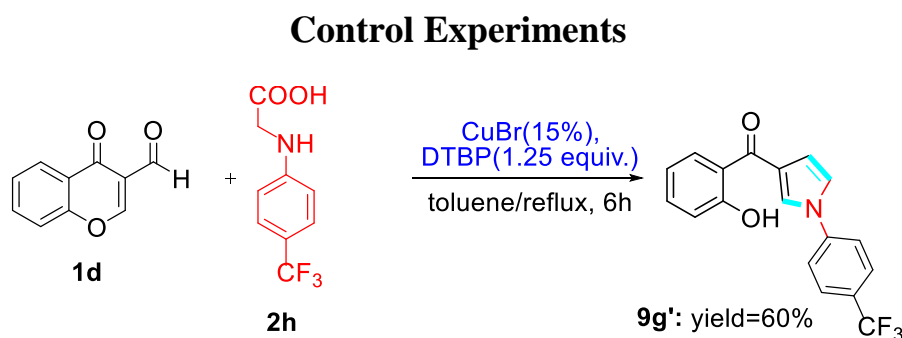

**Scheme S2. Control experiments**

Chromone-3-carboxaldehydes **1d** (0.5 mmol) was charged into a round-bottom flask. Then toluene (3mL), *N*-phenylglycine **2h** (0.8 mmol), CuBr (15%), and DTBP (1.25 equiv.) were added to the mixture. The mixture was stirred at reflux for approximately 6 hours. The mixture was cooled to room temperature. Then the reaction mixture was extracted with ethyl acetate (3×15 mL), washed with water and brine, and then dried over MgSO<sub>4</sub>. The combined organic phase was evaporated under reduced pressure to create the crude product. Finally, the product **9g'** was obtained in the pure form by

column chromatography over silica gel using a mixture of petroleum ether/ethyl acetate (20:1, v/v) as the eluent.

**(2-Hydroxyphenyl)(1-(4-(trifluoromethyl)phenyl)-1H-pyrrol-3-yl)methanone (9g')**

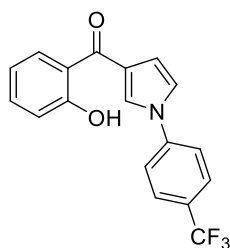

Yellow solid (99 mg, 60%); Mp: 129.5-130.5 °C; IR (KBr): 3447, 1613, 1526, 1486, 1322, 1238, 1160, 1117, 1079, 839, 764, 716, 669  $\text{cm}^{-1}$ ;  $^1\text{H}$  NMR (600 MHz, Acetone- $d_6$ ):  $\delta$  = 6.92 (s, 1H, ArH), 6.93-7.02 (m, 2H, ArH), 7.54-7.58 (m, 2H, ArH), 7.90 (d,  $J$  = 8.5 Hz, 2H, ArH), 7.98 (d,  $J$  = 8.5 Hz, 2H, ArH), 8.14-8.16 (m, 2H, ArH), 12.20 (s, 1H, ArOH);  $^{13}\text{C}$  NMR (150 MHz, Acetone- $d_6$ ):  $\delta$  = 112.8, 117.7, 117.8, 118.9, 118.9, 120.4, 121.1, 121.3, 124.2 (q,  $J_1$  = 270.0 Hz), 125.6, 127.0-127.1 (q,  $J_3$  = 3.0 Hz), 127.0-127.1 (q,  $J_3$  = 3.0 Hz), 128.0 (t,  $J_2$  = 33.0 Hz), 132.0, 135.3, 142.5, 162.5, 193.6;  $^{19}\text{F}$  NMR (564 MHz, Acetone- $d_6$ ):  $\delta$  = -62.9. HRMS (TOF ES $^+$ ):  $m/z$  calcd for  $\text{C}_{18}\text{H}_{13}\text{F}_3\text{NO}_2$  [(M+H) $^+$ ], 332.0893; found, 332.0889.

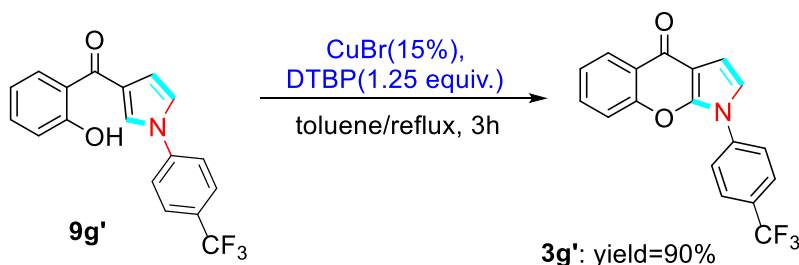

**Scheme S3. Control experiments**

The compound **9g'** (0.2 mmol) was charged into a round-bottom flask. Then toluene (2mL), CuBr (15%), DTBP (1.25 equiv.) were added to the mixture. The mixture was stirred at reflux for approximately 3 hours. The mixture was cooled to room temperature. Then the reaction mixture was extracted with ethyl acetate (2×10 mL), washed with water and brine, and then dried over  $\text{MgSO}_4$ . The combined organic phase was evaporated under reduced pressure to create the crude product. Finally, the product **3g'** was obtained in the pure form by column chromatography over silica gel using a mixture of petroleum ether/ethyl acetate (8:1, v/v) as the eluent.



## Spectroscopic Data of 2 & 3

### (4-Fluorophenyl)glycine (2a)

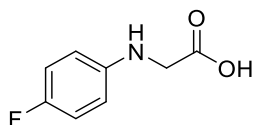

White solid (1.58g, 93%); Mp: 138.3-139.7 °C; <sup>1</sup>H NMR (600 MHz, DMSO-*d*<sub>6</sub>): δ = 3.78 (s, 2H, CH<sub>2</sub>), 6.54-6.56 (m, 2H, ArH), 6.92 (t, *J* = 8.8 Hz, 2H, ArH); <sup>13</sup>C NMR (150 MHz, DMSO-*d*<sub>6</sub>): δ = 45.6, 113.4 (d, *J*<sub>3</sub> = 6.0 Hz), 113.4 (d, *J*<sub>3</sub> = 6.0 Hz), 115.6 (d, *J*<sub>2</sub> = 22.5 Hz), 115.6 (d, *J*<sub>2</sub> = 22.5 Hz), 145.4, 155.0 (d, *J*<sub>1</sub> = 229.5 Hz), 173.1; <sup>19</sup>F NMR (564 MHz, DMSO-*d*<sub>6</sub>): δ = -129.4. HRMS (TOF ES<sup>+</sup>): *m/z* calcd for C<sub>8</sub>H<sub>9</sub>FNO<sub>2</sub> [(M+H)<sup>+</sup>], 170.0612; found, 170.0613.

### (4-Chlorophenyl)glycine (2b)

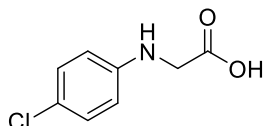

White solid (1.67g, 90%); Mp: 140.5-141.9 °C; <sup>1</sup>H NMR (600 MHz, DMSO-*d*<sub>6</sub>): δ = 3.79 (s, 2H, ArH), 6.57 (d, *J* = 8.4 Hz, 2H, ArH), 7.10 (d, *J* = 8.4 Hz, 2H, ArH); <sup>13</sup>C NMR (150 MHz, DMSO-*d*<sub>6</sub>): δ = 45.1, 114.0, 114.0, 119.9, 129.0, 129.0, 147.7, 172.8. HRMS (TOF ES<sup>+</sup>): *m/z* calcd for C<sub>8</sub>H<sub>9</sub>ClNO<sub>2</sub> [(M+H)<sup>+</sup>], 186.0316; found, 186.0314.

### (3-Fluorophenyl)glycine (2c)

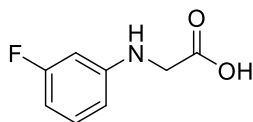

Yellow solid (1.67g, 98%); Mp: 153.2-154.3 °C; <sup>1</sup>H NMR (600 MHz, DMSO-*d*<sub>6</sub>): δ = 3.82 (s, 2H, CH<sub>2</sub>), 6.31-6.35 (m, 2H, ArH), 6.40 (t, *J* = 8.3 Hz, 1H, ArH), 7.06-7.09 (m, 1H, ArH), 12.6 (s, 1H, COOH); <sup>13</sup>C NMR (150 MHz, DMSO-*d*<sub>6</sub>): δ = 45.0, 98.9 (d, *J*<sub>2</sub> = 24.0 Hz), 102.6 (d, *J*<sub>2</sub> = 21.0 Hz), 108.9, 130.6 (d, *J*<sub>3</sub> = 10.5 Hz), 150.8 (d, *J*<sub>3</sub> = 10.5 Hz), 163.9 (d, *J*<sub>1</sub> = 237.0 Hz), 172.8; <sup>19</sup>F NMR (564 MHz, DMSO-*d*<sub>6</sub>): δ = -113.4. HRMS (TOF ES<sup>+</sup>): *m/z* calcd for C<sub>8</sub>H<sub>9</sub>FNO<sub>2</sub> [(M+H)<sup>+</sup>], 170.0612; found, 170.0614.

### (2-Chlorophenyl)glycine (2d)

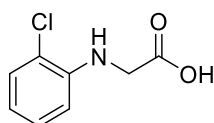

White solid (1.54g, 83%); Mp: 170.8-172.0 °C; <sup>1</sup>H NMR (600 MHz, DMSO-*d*<sub>6</sub>): δ = 3.92 (s, 2H, CH<sub>2</sub>), 5.56 (s, 1H, NH), 6.58-6.64 (m, 2H, ArH), 7.13 (t, *J* = 7.4 Hz,

1H, ArH), 7.27 (d,  $J = 7.8$  Hz, 1H, ArH);  $^{13}\text{C}$  NMR (150 MHz, DMSO- $d_6$ ):  $\delta = 44.9, 111.9, 117.5, 118.3, 128.4, 129.4, 144.1, 172.6$ . HRMS (TOF ES $^+$ ):  $m/z$  calcd for  $\text{C}_8\text{H}_9\text{ClNO}_2$  [(M+H) $^+$ ], 186.0316; found, 186.0313.

#### ***p*-Tolylglycine (2f)**

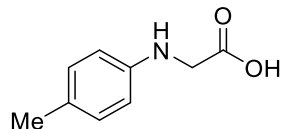

Yellow solid (1.37g, 83%); Mp: 117.5-118.3 °C;  $^1\text{H}$  NMR (600 MHz, DMSO- $d_6$ ):  $\delta = 2.15$  (s, 3H,  $\text{CH}_3$ ), 3.75 (s, 2H,  $\text{CH}_2$ ), 6.47 (d,  $J = 8.0$  Hz, 2H, ArH), 6.90 (d,  $J = 8.0$  Hz, 2H, ArH);  $^{13}\text{C}$  NMR (150 MHz, DMSO- $d_6$ ):  $\delta = 20.5, 45.5, 112.8, 112.8, 125.1, 129.7, 129.7, 146.3, 173.2$ . HRMS (TOF ES $^+$ ):  $m/z$  calcd for  $\text{C}_9\text{H}_{12}\text{NO}_2$  [(M+H) $^+$ ], 166.0863; found, 166.0866.

#### **(4-Methoxyphenyl)glycine (2g)**

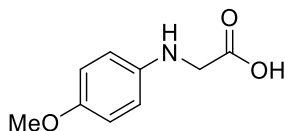

Brown solid (1.54g, 85%); Mp: 225.1-226.0 °C;  $^1\text{H}$  NMR (600 MHz, DMSO- $d_6$ ):  $\delta = 3.64$  (s, 3H,  $\text{OCH}_3$ ), 3.73 (s, 2H,  $\text{CH}_2$ ), 6.52 (d,  $J = 8.3$  Hz, 2H, ArH), 6.72 (d,  $J = 8.3$  Hz, 2H, ArH);  $^{13}\text{C}$  NMR (150 MHz, DMSO- $d_6$ ):  $\delta = 46.1, 55.8, 113.7, 113.7, 115.0, 115.0, 142.9, 152.5, 173.4$ . HRMS (TOF ES $^+$ ):  $m/z$  calcd for  $\text{C}_9\text{H}_{12}\text{NO}_3$  [(M+H) $^+$ ], 182.0812; found, 182.0811.

#### **(4-(Trifluoromethyl)phenyl)glycine (2h)**

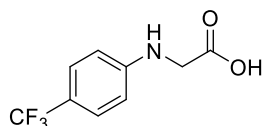

White solid (1.31g, 72%); Mp: 139.9-142.3 °C;  $^1\text{H}$  NMR (600 MHz, DMSO- $d_6$ ):  $\delta = 3.89$  (s, 2H,  $\text{CH}_2$ ), 6.64 (s, 1H, NH), 6.68 (d,  $J = 8.6$  Hz, 2H, ArH), 7.39 (d,  $J = 8.6$  Hz, 2H, ArH), 12.7 (s, 1H, COOH);  $^{13}\text{C}$  NMR (150 MHz, DMSO- $d_6$ ):  $\delta = 44.6, 112.1, 112.1, 116.4$  (q,  $J_2 = 31.5$  Hz), 125.8 (q,  $J_1 = 268.5$  Hz), 126.6 (q,  $J_3 = 4.5$  Hz), 126.6 (q,  $J_3 = 4.5$  Hz), 151.8, 172.5. HRMS (TOF ES $^+$ ):  $m/z$  calcd for  $\text{C}_9\text{H}_9\text{F}_3\text{NO}_2$  [(M+H) $^+$ ], 220.0580; found, 220.0586.

#### **6-Fluoro-1-(4-fluorophenyl)chromeno[2,3-*b*]pyrrol-4(1H)-one (3a)**

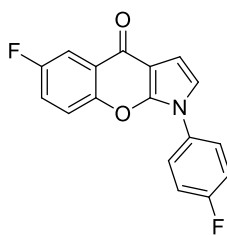

Yellow solid (117mg, 79%); Mp: 117.4-118.2 °C; IR (KBr): 3450, 3106, 1674, 1621, 1549, 1530, 1512, 1472, 1386, 1253, 1145, 836, 784, 775, 646  $\text{cm}^{-1}$ ;  $^1\text{H}$  NMR (600 MHz,  $\text{CDCl}_3$ ):  $\delta$  = 6.80 (d,  $J$  = 3.1 Hz, 1H, ArH), 6.83 (d,  $J$  = 3.4 Hz, 1H, ArH), 7.27 (t,  $J$  = 8.3 Hz, 2H, ArH), 7.31-7.34 (m, 1H, ArH), 7.42-7.44 (m, 1H, ArH), 7.55-7.57 (m, 2H, ArH), 7.99-8.00 (m, 1H, ArH);  $^{13}\text{C}$  NMR (150 MHz,  $\text{CDCl}_3$ ):  $\delta$  = 103.5, 107.1, 111.8 (d,  $J_2$  = 24.0 Hz), 116.7 (d,  $J_2$  = 22.5 Hz), 116.7 (d,  $J_2$  = 22.5 Hz), 118.9, 119.1 (d,  $J_3$  = 7.5 Hz), 120.4 (d,  $J_2$  = 25.5 Hz), 124.7 (d,  $J_3$  = 7.5 Hz), 125.9 (d,  $J_3$  = 7.5 Hz), 125.9 (d,  $J_3$  = 7.5 Hz), 132.2, 148.6, 150.1, 159.3 (d,  $J_1$  = 244.5 Hz), 161.9 (d,  $J_1$  = 247.5 Hz), 172.3. HRMS (TOF  $\text{ES}^+$ ):  $m/z$  calcd for  $\text{C}_{17}\text{H}_{10}\text{F}_2\text{NO}_2$  [(M+H) $^+$ ], 298.0674; found, 298.0668.

### 6-Bromo-1-(4-fluorophenyl)chromeno[2,3-*b*]pyrrol-4(1*H*)-one (3b)

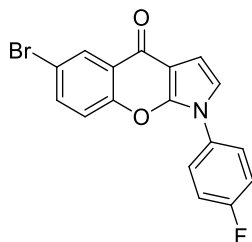

Yellow solid (110mg, 62%); Mp: 173.1-173.9 °C; IR (KBr): 3503, 3114, 1658, 1607, 1527, 1460, 1397, 1334, 1298, 1230, 1127, 1021, 865, 836, 741, 684  $\text{cm}^{-1}$ ;  $^1\text{H}$  NMR (600 MHz,  $\text{CDCl}_3$ ):  $\delta$  = 6.85 (s, 2H, ArH), 6.29 (t,  $J$  = 8.7 Hz, 2H, ArH), 7.36 (d,  $J$  = 8.8 Hz, 1H, ArH), 7.56-7.58 (m, 2H, ArH), 7.72-7.73 (m, 1H, ArH), 8.52 (d,  $J$  = 1.4 Hz, 1H, ArH);  $^{13}\text{C}$  NMR (150 MHz,  $\text{CDCl}_3$ ):  $\delta$  = 103.8, 107.6, 116.8 (d,  $J_2$  = 22.5 Hz), 116.8 (d,  $J_2$  = 22.5 Hz), 117.9, 119.0, 119.3, 125.9 (d,  $J_3$  = 7.5 Hz), 125.9 (d,  $J_3$  = 7.5 Hz), 126.0, 129.5, 132.1, 135.5, 148.3, 152.8, 162.0 (d,  $J_1$  = 247.5 Hz), 172.0,  $^{19}\text{F}$  NMR (564 MHz,  $\text{CDCl}_3$ ):  $\delta$  = -112.7. HRMS (TOF  $\text{ES}^+$ ):  $m/z$  calcd for  $\text{C}_{17}\text{H}_{10}\text{BrFNO}_2$  [(M+H) $^+$ ], 357.9873; found, 357.9870.

### 1-(4-Fluorophenyl)-6-methylchromeno[2,3-*b*]pyrrol-4(1*H*)-one (3c)

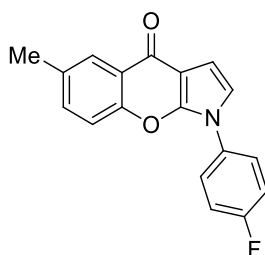

Yellow solid (92mg, 63%); Mp: 131.7-132.4 °C; IR (KBr): 3428, 3112, 2376,

1657, 1618, 1525, 1478, 1406, 1336, 1297, 1230, 1153, 1012, 944, 830, 740, 687  $\text{cm}^{-1}$ ;  $^1\text{H}$  NMR (600 MHz,  $\text{CDCl}_3$ ):  $\delta$  = 2.47 (s, 3H,  $\text{CH}_3$ ), 6.83 (d,  $J$  = 3.4 Hz, 1H, ArH), 6.86 (d,  $J$  = 3.5 Hz, 1H, ArH), 7.26-7.29 (m, 2H, ArH), 7.35 (d,  $J$  = 8.5 Hz, 1H, ArH), 7.44-7.46 (m, 1H, ArH), 7.56-7.59 (m, 1H, ArH), 8.20 (s, 1H, ArH);  $^{13}\text{C}$  NMR (150 MHz,  $\text{CDCl}_3$ ):  $\delta$  = 20.8, 103.8, 107.6, 116.6 (d,  $J_2$  = 22.5 Hz), 116.6 (d,  $J_2$  = 22.5 Hz), 117.1, 118.4, 125.8, 125.8 (d,  $J_3$  = 9.0 Hz), 125.8 (d,  $J_3$  = 9.0 Hz), 126.3, 132.4, 133.8, 134.4, 148.6, 152.3, 161.8 (d,  $J_1$  = 247.5 Hz), 173.6;  $^{19}\text{F}$  NMR (564 MHz,  $\text{CDCl}_3$ ):  $\delta$  = -113.3. HRMS (TOF  $\text{ES}^+$ ):  $m/z$  calcd for  $\text{C}_{18}\text{H}_{13}\text{FNO}_2$  [(M+H) $^+$ ], 294.0925; found, 294.0925.

### 6-Chloro-1-(4-fluorophenyl)-7-methylchromeno[2,3-*b*]pyrrol-4(1*H*)-one (3d)

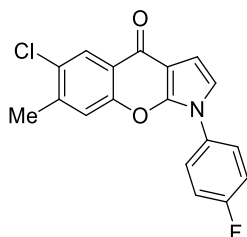

Yellow solid (96mg, 59%); Mp: 128.2-128.9  $^{\circ}\text{C}$ ; IR (KBr): 3432, 3119, 1658, 1619, 1521, 1385, 1385, 1298, 1230, 1154, 907, 840, 739, 666, 622  $\text{cm}^{-1}$ ;  $^1\text{H}$  NMR (600 MHz,  $\text{CDCl}_3$ ):  $\delta$  = 2.46 (s, 3H,  $\text{CH}_3$ ), 6.78-6.80 (m, 2H, ArH), 7.25-7.28 (m, 2H, ArH), 7.31 (s, 1H, ArH), 7.54-7.56 (m, 2H, ArH), 8.27 (s, 1H, ArH);  $^{13}\text{C}$  NMR (150 MHz,  $\text{CDCl}_3$ ):  $\delta$  = 20.5, 103.7, 107.3, 116.7 (d,  $J_2$  = 22.5 Hz), 116.7 (d,  $J_2$  = 22.5 Hz), 118.7, 119.2, 122.4, 125.8 (d,  $J_3$  = 7.5 Hz), 125.8 (d,  $J_3$  = 7.5 Hz), 126.4, 131.0, 132.2, 141.6, 148.3, 152.2, 161.9 (d,  $J_1$  = 247.5 Hz), 172.2. HRMS (TOF  $\text{ES}^+$ ):  $m/z$  calcd for  $\text{C}_{18}\text{H}_{12}\text{ClFNO}_2$  [(M+H) $^+$ ], 328.0535; found, 328.0528.

### 1-(4-Chlorophenyl)-6-fluorochromeno[2,3-*b*]pyrrol-4(1*H*)-one(3e)

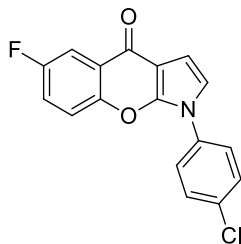

Yellow solid (131mg, 83%); Mp: 140.5-141.7  $^{\circ}\text{C}$ ; IR (KBr): 3464, 3106, 2778, 1671, 1531, 1473, 1330, 1268, 1188, 1139, 1094, 1012, 952, 867, 774, 689  $\text{cm}^{-1}$ ;  $^1\text{H}$  NMR (600 MHz,  $\text{CDCl}_3$ ):  $\delta$  = 6.86 (d,  $J$  = 3.7 Hz, 1H, ArH), 6.87 (d,  $J$  = 3.6 Hz, 1H, ArH), 7.35-7.38 (m, 1H, ArH), 7.45-7.48 (m, 1H, ArH), 7.54-7.757 (m, 4H, ArH), 8.03-8.05 (m, 1H, ArH);  $^{13}\text{C}$  NMR (150 MHz,  $\text{CDCl}_3$ ):  $\delta$  = 103.9, 107.3, 111.9 (d,  $J$  = 24.0 Hz), 118.6, 119.1 (d,  $J$  = 9.0 Hz), 120.5 (d,  $J$  = 25.5 Hz), 124.7 (d,  $J$  = 6.0 Hz), 125.1, 125.1, 130.0, 130.0, 133.8, 134.6, 148.5, 150.1, 159.3 (d,  $J$  = 244.5 Hz), 172.4;  $^{19}\text{F}$  NMR (564 MHz,  $\text{CDCl}_3$ ):  $\delta$  = -116.4. HRMS

(TOF ES<sup>+</sup>):  $m/z$  calcd for C<sub>17</sub>H<sub>10</sub>ClFNO<sub>2</sub> [(M+H)<sup>+</sup>], 314.0379; found, 314.0373.

**6-Chloro-1-(4-chlorophenyl)chromeno[2,3-*b*]pyrrol-4(1*H*)-one (3f)**

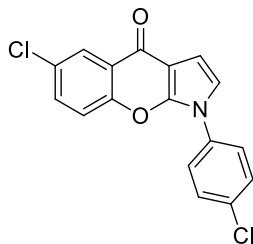

Yellow solid (127mg, 77%); Mp: 145.7-146.6 °C; IR (KBr): 3399, 3113, 1659, 1605, 1527, 1463, 1399, 1331, 1280, 1181, 1098, 1013, 829, 723, 683 cm<sup>-1</sup>; <sup>1</sup>H NMR (600 MHz, CDCl<sub>3</sub>):  $\delta$  = 6.84-6.87 (m, 2H, ArH), 7.42 (d,  $J$  = 8.8 Hz, 1H, ArH), 7.54-7.60 (m, 5H, ArH), 8.35 (s, 1H, Ar H); <sup>13</sup>C NMR (150 MHz, CDCl<sub>3</sub>):  $\delta$  = 104.0, 107.7, 118.7, 119.0, 124.5, 125.1, 125.1, 126.3, 130.0, 130.0, 130.6, 132.8, 133.9, 134.6, 148.3, 152.3, 172.1. HRMS (TOF ES<sup>+</sup>):  $m/z$  calcd for C<sub>17</sub>H<sub>10</sub>Cl<sub>2</sub>NO<sub>2</sub> [(M+H)<sup>+</sup>], 330.0083; found, 330.0084.

**1-(4-Chlorophenyl)chromeno[2,3-*b*]pyrrol-4(1*H*)-one (3g)**

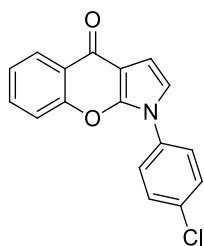

Yellow solid (106mg, 72%); Mp: 158.2-159.2 °C; IR (KBr): 3411, 3128, 1667, 1612, 1542, 1524, 1508, 1493, 1459, 1257, 1234, 1175, 1093, 1009, 964, 828, 739, 690 cm<sup>-1</sup>; <sup>1</sup>H NMR (600 MHz, CDCl<sub>3</sub>):  $\delta$  = 6.85 (d,  $J$  = 3.7 Hz, 1H, ArH), 6.87 (d,  $J$  = 3.6 Hz, 1H, ArH), 7.44 (d,  $J$  = 7.4 Hz, 1H, ArH), 7.47 (d,  $J$  = 8.4 Hz, 1H, ArH), 7.56 (s, 4H, ArH), 7.65 (s, 1H, ArH), 8.41 (d,  $J$  = 7.8 Hz, 1H, ArH); <sup>13</sup>C NMR (150 MHz, CDCl<sub>3</sub>):  $\delta$  = 104.1, 107.8, 117.4, 118.2, 123.3, 124.7, 125.0, 125.0, 126.8, 129.9, 129.9, 132.7, 133.6, 134.8, 148.3, 154.1, 173.4. HRMS (TOF ES<sup>+</sup>):  $m/z$  calcd for C<sub>17</sub>H<sub>11</sub>ClNO<sub>2</sub> [(M+H)<sup>+</sup>], 296.0473; found, 296.0468.

**1-(4-Chlorophenyl)-6-methylchromeno[2,3-*b*]pyrrol-4(1*H*)-one (3h)**

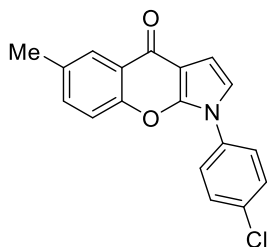

Yellow solid (108mg, 70%); Mp: 130.7-131.2 °C; IR (KBr): 3477, 3109, 1658, 1619, 1525, 1333, 1293, 1205, 1097, 1016, 946, 830, 807, 739, 689 cm<sup>-1</sup>; <sup>1</sup>H

NMR (600 MHz, CDCl<sub>3</sub>):  $\delta$  = 2.49 (s, 3H, CH<sub>3</sub>), 6.84 (d,  $J$  = 3.5 Hz, 1H, ArH), 6.86 (d,  $J$  = 3.4 Hz, 1H, ArH), 7.36 (d,  $J$  = 8.5 Hz, 1H, ArH), 7.46 (d,  $J$  = 8.5 Hz, 1H, ArH), 7.55 (s, 4H, ArH), 8.19 (s, 1H, ArH); <sup>13</sup>C NMR (150 MHz, CDCl<sub>3</sub>):  $\delta$  = 20.8, 104.0, 107.8, 117.1, 118.1, 123.0, 124.9, 124.9, 126.3, 130.0, 130.0, 133.5, 133.8, 134.5, 134.8, 148.5, 152.3, 173.6. HRMS (TOF ES<sup>+</sup>):  $m/z$  calcd for C<sub>18</sub>H<sub>13</sub>ClNO<sub>2</sub> [(M+H)<sup>+</sup>], 310.0629; found, 310.0623.

**6-Chloro-1-(4-chlorophenyl)-7-methylchromeno[2,3-*b*]pyrrol-4(1*H*)-one (3i)**

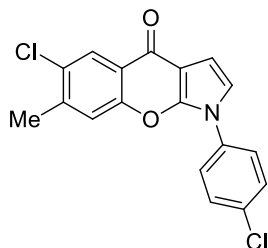

Yellow solid (127mg, 74%); Mp: 241.9-242.4 °C; IR (KBr): 3422, 1659, 1615, 1527, 1342, 1156, 848, 621, 573 cm<sup>-1</sup>; <sup>1</sup>H NMR (600 MHz, CDCl<sub>3</sub>):  $\delta$  = 2.51 (s, 3H, CH<sub>3</sub>), 6.86 (s, 2H, ArH), 7.37 (s, 1H, ArH), 7.54-7.57 (m, 4H, ArH), 8.35 (s, 1H, ArH); <sup>13</sup>C NMR (150 MHz, CDCl<sub>3</sub>):  $\delta$  = 20.6, 104.1, 107.6, 118.4, 119.3, 122.5, 125.1, 125.1, 126.6, 130.0, 130.0, 131.2, 133.8, 134.7, 141.8, 148.3, 152.3, 172.3. HRMS (TOF ES<sup>+</sup>):  $m/z$  calcd for C<sub>18</sub>H<sub>12</sub>Cl<sub>2</sub>NO<sub>2</sub> [(M+H)<sup>+</sup>], 344.0240; found, 344.0236.

**6-Chloro-1-(3-fluorophenyl)chromeno[2,3-*b*]pyrrol-4(1*H*)-one (3j)**

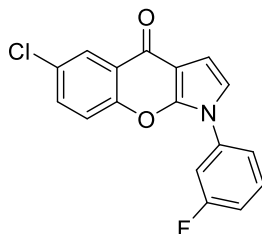

Yellow solid (96mg, 61%); Mp: 155.4-156.4 °C; IR (KBr): 3442, 3117, 1659, 1610, 1527, 1461, 1400, 1327, 1283, 1204, 1126, 854, 814, 779, 683 cm<sup>-1</sup>; <sup>1</sup>H NMR (500 MHz, CDCl<sub>3</sub>):  $\delta$  = 6.86 (d,  $J$  = 3.6 Hz, 1H, ArH), 6.89 (d,  $J$  = 3.6 Hz, 1H, ArH), 7.16-7.19 (m, 1H, ArH), 7.35-7.40 (m, 2H, ArH), 7.46 (d,  $J$  = 8.9 Hz, 1H, ArH), 7.53-7.61 (m, 2H, ArH), 8.36 (d,  $J$  = 2.3 Hz, 1H, ArH); <sup>13</sup>C NMR (125 MHz, CDCl<sub>3</sub>):  $\delta$  = 104.2, 107.8, 111.3 (d,  $J_2$  = 25.0 Hz), 115.0 (d,  $J_2$  = 21.3 Hz), 118.6, 119.1, 119.3 (d,  $J_4$  = 3.8 Hz), 124.5, 126.3, 130.6, 131.1 (d,  $J_3$  = 8.8 Hz), 132.8, 137.4 (d,  $J_3$  = 10.0 Hz), 148.3, 152.3, 163.1 (d,  $J_1$  = 246.3 Hz), 172.1; <sup>19</sup>F NMR (470 MHz, CDCl<sub>3</sub>):  $\delta$  = -109.8. HRMS (TOF ES<sup>+</sup>):  $m/z$  calcd for C<sub>17</sub>H<sub>10</sub>FCINO<sub>2</sub> [(M+H)<sup>+</sup>], 314.0379; found, 314.0372.

**1-(3-Fluorophenyl)chromeno[2,3-*b*]pyrrol-4(1*H*)-one (3k)**

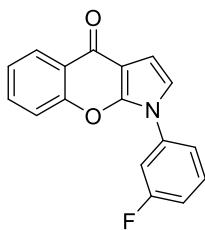

Yellow solid (84mg, 60%); Mp: 108.9-109.6 °C; IR (KBr): 3443, 3120, 1661, 1608, 1526, 1461, 1328, 1286, 1205, 1125, 854, 814, 777, 714, 682 cm<sup>-1</sup>; <sup>1</sup>H NMR (600 MHz, CDCl<sub>3</sub>): δ = 6.88 (t, *J* = 3.4 Hz, 1H, ArH), 6.90 (d, *J* = 3.5 Hz, 1H, ArH), 7.18 (t, *J* = 8.1 Hz, 1H, ArH), 7.38-7.50 (m, 3H, ArH), 7.53 (t, *J* = 7.9 Hz, 1H, ArH), 7.57 (d, *J* = 7.9 Hz, 1H, ArH), 7.67 (t, *J* = 7.3 Hz, 1H, ArH), 8.42 (d, *J* = 7.9 Hz, 1H, ArH); <sup>13</sup>C NMR (150 MHz, CDCl<sub>3</sub>): δ = 104.2, 107.9, 111.2 (d, *J*<sub>2</sub> = 25.5 Hz), 114.7 (d, *J*<sub>2</sub> = 21.0 Hz), 117.4, 118.1, 119.1 (d, *J*<sub>4</sub> = 3.0 Hz), 123.4, 124.7, 126.8, 131.1 (d, *J*<sub>3</sub> = 9.0 Hz), 132.8, 137.6 (d, *J*<sub>3</sub> = 10.5 Hz), 148.3, 154.1, 163.1 (d, *J*<sub>1</sub> = 246.0 Hz), 173.4; <sup>19</sup>F NMR (564 MHz, CDCl<sub>3</sub>): δ = -110.0. HRMS (TOF ES<sup>+</sup>): *m/z* calcd for C<sub>17</sub>H<sub>11</sub>FNO<sub>2</sub> [(M+H)<sup>+</sup>], 280.0768; found, 280.0766.

### 1-(3-Fluorophenyl)-6-methylchromeno[2,3-*b*]pyrrol-4(1*H*)-one (31)

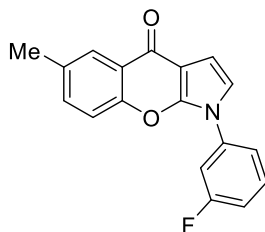

Yellow solid (92mg, 63%); Mp: 119.7-120.5 °C; IR (KBr): 3455, 3112, 1659, 1611, 1525, 1400, 1339, 1273, 1201, 1125, 1001, 889, 854, 767, 686, 644 cm<sup>-1</sup>; <sup>1</sup>H NMR (600 MHz, CDCl<sub>3</sub>): δ = 2.49 (s, 3H, CH<sub>3</sub>), 6.87 (d, *J* = 3.5 Hz, 1H, ArH), 6.88 (d, *J* = 3.5 Hz, 1H, ArH), 7.15-7.18 (m, 1H, ArH), 7.38-7.42 (m, 3H, ArH), 7.47 (d, *J* = 8.3 Hz, 1H, ArH), 7.53-7.56 (m, 1H, ArH), 8.19 (s, 1H, ArH); <sup>13</sup>C NMR (150 MHz, CDCl<sub>3</sub>): δ = 20.8, 104.2, 107.9, 111.1 (d, *J*<sub>2</sub> = 25.5 Hz), 114.6 (d, *J*<sub>2</sub> = 21.0 Hz), 117.2, 117.9, 119.0 (d, *J*<sub>4</sub> = 3.0 Hz), 123.0, 126.3, 131.0 (d, *J*<sub>3</sub> = 9.0 Hz), 133.9, 134.5, 137.7 (d, *J*<sub>3</sub> = 9.0 Hz), 148.4, 152.3, 163.1 (d, *J*<sub>1</sub> = 246.0 Hz), 173.6; <sup>19</sup>F NMR (564 MHz, CDCl<sub>3</sub>): δ = -110.0. HRMS (TOF ES<sup>+</sup>): *m/z* calcd for C<sub>18</sub>H<sub>13</sub>FNO<sub>2</sub> [(M+H)<sup>+</sup>], 294.0925; found, 294.0920.

### 1-(2-Chlorophenyl)-6-fluorochromeno[2,3-*b*]pyrrol-4(1*H*)-one (3m)

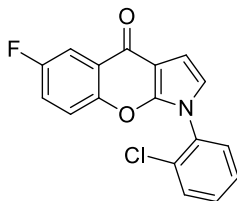

Yellow solid (100mg, 64%); Mp: 88.2-89.4 °C; IR (KBr): 3447, 3106, 1666, 1519, 1477, 1282, 1189, 1139, 824, 772, 720, 685 cm<sup>-1</sup>; <sup>1</sup>H NMR (500 MHz, CDCl<sub>3</sub>): δ = 6.73 (d, *J* = 3.7 Hz, 1H, ArH), 6.86 (d, *J* = 3.7 Hz, 1H, ArH), 7.30-7.34 (m, 1H, ArH), 7.37-7.40 (m, 1H, ArH), 7.48-7.53 (m, 3H, ArH), 7.63-7.65 (m, 1H, ArH), 8.04-8.06 (m, 1H, ArH); <sup>13</sup>C NMR (150 MHz, CDCl<sub>3</sub>): δ = 103.4, 106.6, 111.9 (d, *J* = 24.0 Hz), 119.1 (d, *J* = 7.5 Hz), 120.0, 120.3 (d, *J* = 25.5 Hz), 124.9, 127.9, 129.2, 130.6, 130.9, 132.0, 133.5, 149.5, 150.2, 159.3 (d, *J* = 243.0 Hz), 172.5; <sup>19</sup>F NMR (564 MHz, CDCl<sub>3</sub>): δ = -116.8. HRMS (TOF ES<sup>+</sup>): *m/z* calcd for C<sub>17</sub>H<sub>10</sub>FCINO<sub>2</sub> [(M+H)<sup>+</sup>], 314.0379; found, 314.0375.

### 6-Chloro-1-(2-chlorophenyl)chromeno[2,3-*b*]pyrrol-4(1*H*)-one (3n)

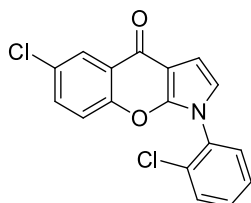

Yellow solid (103mg, 63%); Mp: 127.4-128.6 °C; IR (KBr): 3445, 3116, 1663, 1514, 1455, 1290, 1172, 1134, 827, 775, 712, 689 cm<sup>-1</sup>; <sup>1</sup>H NMR (600 MHz, CDCl<sub>3</sub>): δ = 6.75 (d, *J* = 2.9 Hz, 1H, ArH), 6.88 (d, *J* = 2.9 Hz, 1H, ArH), 7.37 (t, *J* = 8.8 Hz, 1H, ArH), 7.49-7.57 (m, 4H, ArH), 7.64 (t, *J* = 7.8 Hz, 1H, ArH), 8.55 (s, 1H, ArH); <sup>13</sup>C NMR (150 MHz, CDCl<sub>3</sub>): δ = 103.5, 106.9, 119.0, 120.0, 126.3, 127.9, 129.1, 129.1, 130.4, 130.6, 130.9, 132.0, 132.6, 133.4, 149.3, 152.5, 172.2. HRMS (TOF ES<sup>+</sup>): *m/z* calcd for C<sub>17</sub>H<sub>10</sub>Cl<sub>2</sub>NO<sub>2</sub> [(M+H)<sup>+</sup>], 330.0083; found, 330.0081.

### 1-(2-Chlorophenyl)chromeno[2,3-*b*]pyrrol-4(1*H*)-one (3o)

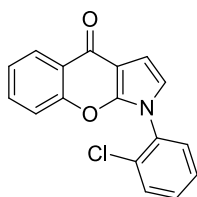

Yellow solid (88mg, 60%); Mp: 147.6-148.6 °C; IR (KBr): 3449, 3102, 1668, 1516, 1434, 1284, 1169, 1103, 848, 766, 703, 684 cm<sup>-1</sup>; <sup>1</sup>H NMR (600 MHz, CDCl<sub>3</sub>): δ = 6.74 (s, 1H, ArH), 6.89 (s, 1H, ArH), 7.30-7.49 (m, 2H, ArH), 7.50-7.61 (m, 3H, ArH), 7.62-7.66 (m, 2H, ArH), 8.43 (d, *J* = 7.8 Hz, 1H, ArH); <sup>13</sup>C NMR (150 MHz, CDCl<sub>3</sub>): δ = 103.5, 107.0, 117.4, 119.6, 123.5, 124.5, 126.8, 127.9, 129.2, 130.5, 130.8, 132.0, 132.5, 133.6, 149.4, 154.2, 173.5. HRMS (TOF ES<sup>+</sup>): *m/z* calcd for C<sub>17</sub>H<sub>11</sub>ClNO<sub>2</sub> [(M+H)<sup>+</sup>], 296.0473; found, 296.0472.

### 6-Chloro-1-(2-chlorophenyl)-7-methylchromeno[2,3-*b*]pyrrol-4(1*H*)-one (3p)



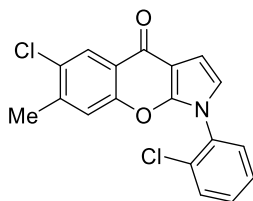

Yellow solid (122mg, 71%); Mp: 121.3-122.8 °C; IR (KBr): 3401, 3101, 2382, 1660, 1618, 1518, 1382, 1238, 1145, 901, 747, 633  $\text{cm}^{-1}$ ;  $^1\text{H}$  NMR (600 MHz,  $\text{CDCl}_3$ ):  $\delta$  = 3.47 (s, 3H,  $\text{CH}_3$ ), 6.73 (s, 1H, ArH), 6.87 (s, 1H, ArH), 7.29 (d,  $J$  = 8.5 Hz, 1H, ArH), 7.48-7.53 (m, 3H, ArH), 7.64 (d,  $J$  = 7.4 Hz, 1H, ArH), 8.35 (s, 1H, ArH);  $^{13}\text{C}$  NMR (150 MHz,  $\text{CDCl}_3$ ):  $\delta$  = 20.5, 103.5, 106.8, 119.3, 119.8, 126.5, 127.9, 129.2, 130.6, 130.8, 130.8, 131.0, 132.0, 133.5, 141.5, 149.2, 152.4, 172.4. HRMS (TOF  $\text{ES}^+$ ):  $m/z$  calcd for  $\text{C}_{18}\text{H}_{12}\text{Cl}_2\text{NO}_2$  [(M+H) $^+$ ], 344.0240; found, 344.0235.

### 6-Fluoro-1-phenylchromeno[2,3-*b*]pyrrol-4(1*H*)-one (3q)

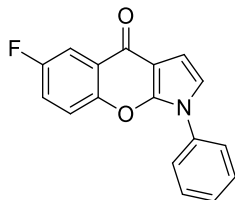

Yellow solid (123mg, 88%); Mp: 173.7-174.8 °C; IR (KBr): 3422, 2360, 1658, 1508, 1453, 1265, 1130, 870, 801, 763, 694  $\text{cm}^{-1}$ ;  $^1\text{H}$  NMR (600 MHz,  $\text{CDCl}_3$  + Acetone- $d_6$ ):  $\delta$  = 6.73 (d,  $J$  = 3.5 Hz, 1H, ArH), 7.13 (d,  $J$  = 3.5 Hz, 1H, ArH), 7.49-7.52 (m, 2H, ArH), 7.61-7.65 (m, 3H, ArH), 7.74 (d,  $J$  = 7.9 Hz, 2H, ArH), 7.89-7.92 (m, 1H, ArH);  $^{13}\text{C}$  NMR (150 MHz,  $\text{CDCl}_3$  + Acetone- $d_6$ ):  $\delta$  = 102.8, 107.0, 110.9 (d,  $J_2$  = 24.0 Hz), 119.0, 119.2, 119.9 (d,  $J_3$  = 7.5 Hz), 120.4 (d,  $J_2$  = 25.5 Hz), 123.8, 124.7 (d,  $J_3$  = 6.0 Hz), 127.9, 129.7, 130.0, 136.2, 148.5, 150.3, 159.2 (d,  $J_1$  = 241.5 Hz), 171.5. HRMS (TOF  $\text{ES}^+$ ):  $m/z$  calcd for  $\text{C}_{17}\text{H}_{11}\text{FNO}_2$  [(M+H) $^+$ ], 280.0768; found, 280.0770.

### 6-Chloro-1-phenylchromeno[2,3-*b*]pyrrol-4(1*H*)-one (3r)

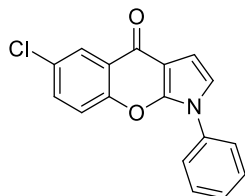

Yellow solid (117mg, 79%); Mp: 209.3-210.4 °C; IR (KBr): 3115, 3069, 1663, 1605, 1532, 1460, 1400, 1271, 1180, 1128, 817, 738, 688, 646  $\text{cm}^{-1}$ ;  $^1\text{H}$  NMR (600 MHz,  $\text{CDCl}_3$ ):  $\delta$  = 6.85 (d,  $J$  = 2.7 Hz, 1H, ArH), 6.90 (d,  $J$  = 2.8 Hz, 1H, ArH), 7.42 (d,  $J$  = 8.8 Hz, 1H, ArH), 7.48 (t,  $J$  = 4.1 Hz, 1H, ArH), 7.56-7.59 (m, 5H, ArH), 8.36 (s, 1H, ArH);  $^{13}\text{C}$  NMR (150 MHz,  $\text{CDCl}_3$ ):  $\delta$  = 103.7, 107.6,

119.0, 119.1, 123.9, 123.9, 123.9, 126.3, 128.0, 129.8, 129.8, 130.4, 132.6, 136.1, 148.4, 152.4, 172.1. HRMS (TOF ES<sup>+</sup>): *m/z* calcd for C<sub>17</sub>H<sub>11</sub>ClNO<sub>2</sub> [(M+H)<sup>+</sup>], 296.0473; found, 296.0471.

### 6-Bromo-1-phenylchromeno[2,3-*b*]pyrrol-4(1*H*)-one (3s)

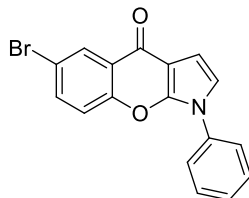

Yellow solid (137mg, 81%); Mp: 215.5-216.8 °C; IR (KBr): 3447, 3118, 2665, 1663, 1602, 1529, 1460, 1399, 1277, 1124, 1064, 860, 743, 690 cm<sup>-1</sup>; <sup>1</sup>H NMR (600 MHz, CDCl<sub>3</sub>): δ = 6.84 (s, 1H, ArH), 6.89 (s, 1H, ArH), 7.36 (d, *J* = 8.6 Hz, 1H, ArH), 7.48 (s, 1H, ArH), 7.59 (s, 4H, ArH), 7.70 (s, 1H, ArH), 8.50 (s, 1H, ArH); <sup>13</sup>C NMR (150 MHz, CDCl<sub>3</sub>): δ = 103.7, 107.6, 117.8, 119.0, 119.3, 123.9, 123.9, 124.8, 128.0, 129.4, 129.8, 129.8, 135.4, 136.1, 148.3, 152.8, 172.0. HRMS (TOF ES<sup>+</sup>): *m/z* calcd for C<sub>17</sub>H<sub>11</sub>BrNO<sub>2</sub> [(M+H)<sup>+</sup>], 339.9968; found, 339.9963.

### 1-Phenylchromeno[2,3-*b*]pyrrol-4(1*H*)-one (3t)

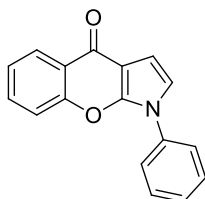

Yellow solid (106mg, 81%); Mp: 117.1-118.2 °C; IR (KBr): 3447, 3102, 1668, 1613, 1541, 1505, 1459, 1312, 1295, 1122, 1098, 1029, 904, 749, 686, 644 cm<sup>-1</sup>; <sup>1</sup>H NMR (600 MHz, Acetone-*d*<sub>6</sub>): δ = 6.74 (d, *J* = 3.7 Hz, 1H, ArH), 7.17 (d, *J* = 3.7 Hz, 1H, ArH), 7.48-7.53 (m, 2H, ArH), 7.59 (d, *J* = 8.3 Hz, 1H, ArH), 7.65 (t, *J* = 8.0 Hz, 2H, ArH), 7.75 (t, *J* = 8.3 Hz, 1H, ArH), 7.79 (d, *J* = 7.9 Hz, 2H, ArH), 8.30 (d, *J* = 7.9 Hz, 1H, ArH); <sup>13</sup>C NMR (150 MHz, Acetone-*d*<sub>6</sub>): δ = 102.9, 107.4, 117.7, 118.9, 123.4, 123.9, 123.9, 124.5, 126.1, 127.8, 129.7, 129.7, 132.8, 136.4, 148.2, 154.2, 172.2. HRMS (TOF ES<sup>+</sup>): *m/z* calcd for C<sub>17</sub>H<sub>12</sub>NO<sub>2</sub> [(M+H)<sup>+</sup>], 262.0863; found, 262.0860.

### 6-Methyl-1-phenylchromeno[2,3-*b*]pyrrol-4(1*H*)-one (3u)

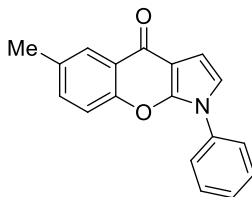

Yellow solid (89mg, 65%); Mp: 134.0-135.4 °C; IR (KBr): 3393, 3111, 1664, 1606, 1531, 1204, 804, 747, 695, 645 cm<sup>-1</sup>; <sup>1</sup>H NMR (600 MHz, CDCl<sub>3</sub>): δ = 6.88 (d, *J* = 4.2 Hz, 2H, ArH), 7.37 (d, *J* = 8.3 Hz, 1H, ArH), 7.44 (s, 1H, ArH), 7.46 (d, *J* = 8.3 Hz, 1H, ArH), 7.56-7.61 (m, 4H, ArH), 8.20 (s, 1H, ArH); <sup>13</sup>C NMR (150 MHz, CDCl<sub>3</sub>): δ = 20.8, 103.7, 107.7, 117.1, 118.4, 123.0, 123.7, 123.7, 126.3, 127.7, 129.7, 129.7, 133.7, 134.3, 136.4, 148.6, 152.4, 173.7. HRMS (TOF ES<sup>+</sup>): *m/z* calcd for C<sub>18</sub>H<sub>14</sub>NO<sub>2</sub> [(M+H)<sup>+</sup>], 276.1019; found, 276.1016.

### 6-Methoxy-1-phenylchromeno[2,3-*b*]pyrrol-4(1*H*)-one (3v)

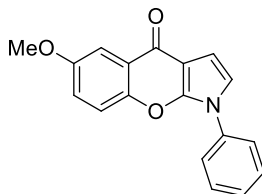

Yellow solid (80mg, 55%); Mp: 112.6-113.3 °C; IR (KBr): 3438, 3072, 1663, 1608, 1513, 1505, 1433, 1337, 1208, 1145, 1100, 1019, 976, 826, 735 cm<sup>-1</sup>; <sup>1</sup>H NMR (600 MHz, CDCl<sub>3</sub>): δ = 3.84 (s, 3H, CH<sub>3</sub>), 6.77 (d, *J* = 3.4 Hz, 1H, ArH), 6.79 (d, *J* = 3.4 Hz, 1H, ArH), 7.12-7.14 (m, 1H, ArH), 7.30 (d, *J* = 9.1 Hz, 1H, ArH), 7.36 (t, *J* = 7.1 Hz, 1H, ArH), 7.46-7.51 (m, 4H, ArH), 7.71 (d, *J* = 2.8 Hz, 1H, ArH); <sup>13</sup>C NMR (150 MHz, CDCl<sub>3</sub>): δ = 54.9, 102.5, 105.7, 106.4, 117.5, 117.6, 121.0, 122.7, 122.7, 122.7, 126.7, 128.7, 128.7, 135.3, 147.6, 147.7, 155.5, 172.4. HRMS (TOF ES<sup>+</sup>): *m/z* calcd for C<sub>18</sub>H<sub>14</sub>NO<sub>3</sub> [(M+H)<sup>+</sup>], 292.0968; found, 292.0968.

### 6,8-Dichloro-1-phenylchromeno[2,3-*b*]pyrrol-4(1*H*)-one (3w)

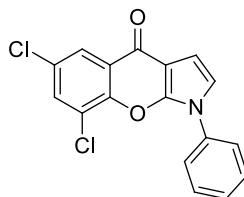

Yellow solid (127mg, 77%); Mp: 217.4-218.5 °C; IR (KBr): 3399, 3124, 2343, 1664, 1597, 1533, 1455, 1416, 1310, 1215, 1180, 1109, 947, 871, 748, 689, 607 cm<sup>-1</sup>; <sup>1</sup>H NMR (600 MHz, CDCl<sub>3</sub> + DMSO-*d*<sub>6</sub>): δ = 6.71 (d, *J* = 2.8 Hz, 1H, ArH), 6.89 (d, *J* = 2.5 Hz, 1H, ArH), 7.35 (t, *J* = 7.1 Hz, 1H, ArH), 7.47 (t, *J* = 7.5 Hz, 2H, ArH), 7.57 (t, *J* = 8.0 Hz, 3H, ArH), 8.12 (s, 1H, ArH); <sup>13</sup>C NMR (150 MHz, CDCl<sub>3</sub> + DMSO-*d*<sub>6</sub>): δ = 103.6, 107.4, 119.1, 123.0, 123.4, 123.4, 124.8, 125.4, 127.9, 129.7, 129.7, 129.9, 132.6, 135.8, 147.7, 148.3, 171.1. HRMS (TOF ES<sup>+</sup>): *m/z* calcd for C<sub>17</sub>H<sub>10</sub>Cl<sub>2</sub>NO<sub>2</sub> [(M+H)<sup>+</sup>], 330.0083; found, 330.0081.

### (6-Chloro-7-methyl-1-phenylchromeno[2,3-*b*]pyrrol-4(1*H*)-one (3x)

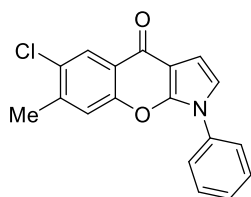

Yellow solid (124mg, 80%); Mp: 191.7-192.4 °C; IR (KBr): 3433, 3129, 1656, 1621, 1520, 1454, 1385, 1269, 1152, 902, 744, 685 cm<sup>-1</sup>; <sup>1</sup>H NMR (500 MHz, CDCl<sub>3</sub>): δ = 2.48 (s, 3H, CH<sub>3</sub>), 6.84 (d, *J* = 3.7 Hz, 1H, ArH), 6.87 (d, *J* = 3.7 Hz, 1H, ArH), 7.36 (s, 1H, ArH), 7.45-7.48 (m, 1H, ArH), 7.57-7.59 (m, 4H, ArH), 8.33 (s, 1H, ArH); <sup>13</sup>C NMR (150 MHz, CDCl<sub>3</sub>): δ = 20.6, 103.6, 107.5, 118.7, 119.3, 122.5, 123.8, 123.8, 126.4, 127.9, 129.7, 129.7, 131.0, 136.2, 141.6, 148.3, 152.2, 172.3. HRMS (TOF ES<sup>+</sup>): *m/z* calcd for C<sub>18</sub>H<sub>13</sub>ClNO<sub>2</sub> [(M+H)<sup>+</sup>], 310.0629; found, 310.0625.

### 6-Chloro-1-(*p*-tolyl)chromeno[2,3-*b*]pyrrol-4(1*H*)-one (3y)

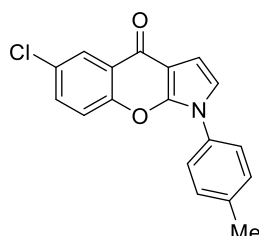

Yellow solid (126 mg, 82%); Mp: 124.1-125.4 °C; IR (KBr): 3437, 3077, 1657, 1604, 1522, 1456, 1398, 1313, 1268, 1172, 1124, 972, 829, 720, 683, 650 cm<sup>-1</sup>; <sup>1</sup>H NMR (600 MHz, CDCl<sub>3</sub>): δ = 2.46 (s, 3H, CH<sub>3</sub>), 6.80 (d, *J* = 3.7 Hz, 1H, ArH), 6.84 (d, *J* = 3.7 Hz, 1H, ArH), 7.36 (d, *J* = 8.2 Hz, 2H, ArH), 7.37 (d, *J* = 8.9 Hz, 1H, ArH), 7.44 (d, *J* = 8.3 Hz, 2H, ArH), 7.53-7.55 (m, 1H, ArH), 8.33 (d, *J* = 2.6 Hz, 1H, ArH); <sup>13</sup>C NMR (150 MHz, CDCl<sub>3</sub>): δ = 21.1, 103.4, 107.5, 119.0, 119.1, 123.8, 123.8, 123.8, 124.5, 126.2, 130.3, 130.3, 132.6, 133.5, 138.1, 148.4, 152.4, 172.1. HRMS (TOF ES<sup>+</sup>): *m/z* calcd for C<sub>18</sub>H<sub>13</sub>ClNO<sub>2</sub> [(M+H)<sup>+</sup>], 310.0629; found, 310.0625.

### 6-Bromo-1-(*p*-tolyl)chromeno[2,3-*b*]pyrrol-4(1*H*)-one (3z)

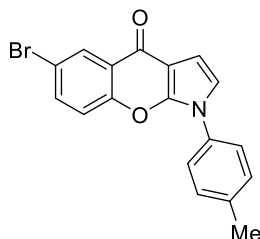

Yellow solid (141mg, 80%); Mp: 122.6-123.4 °C; IR (KBr): 3473, 3081, 1659, 1601, 1522, 1454, 1393, 1268, 1169, 1124, 1065, 972, 829, 720, 681 cm<sup>-1</sup>; <sup>1</sup>H NMR (600 MHz, CDCl<sub>3</sub>): δ = 2.48 (s, 3H, CH<sub>3</sub>), 6.84 (d, *J* = 3.6 Hz, 1H, ArH), 6.87 (d, *J* = 3.6 Hz, 1H, ArH), 7.35-7.39 (m, 3H, ArH), 7.46 (d, *J* = 8.2 Hz, 2H,

ArH), 7.70-7.72 (m, 1H, ArH), 8.53 (d,  $J = 2.2$  Hz, 1H, ArH);  $^{13}\text{C}$  NMR (150 MHz,  $\text{CDCl}_3$ ):  $\delta = 21.1, 103.5, 107.5, 117.8, 119.1, 119.3, 123.8, 123.8, 124.9, 129.4, 130.3, 130.3, 133.5, 135.4, 138.2, 148.4, 152.9, 172.0$ . HRMS (TOF  $\text{ES}^+$ ):  $m/z$  calcd for  $\text{C}_{18}\text{H}_{13}\text{BrNO}_2$  [(M+H) $^+$ ], 354.0124; found, 354.0119.

#### 6-Methyl-1-(*p*-tolyl)chromeno[2,3-*b*]pyrrol-4(1*H*)-one (3a')

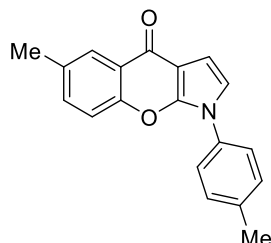

Yellow solid (88mg, 61%); Mp: 79.4-80.6 °C; IR (KBr): 3444, 1665, 1618, 1520, 1475, 1285, 1203, 1120, 943, 809, 736, 685  $\text{cm}^{-1}$ ;  $^1\text{H}$  NMR (600 MHz,  $\text{CDCl}_3$ ):  $\delta = 2.37$  (s, 3H,  $\text{CH}_3$ ), 2.38 (s, 3H,  $\text{CH}_3$ ), 6.75 (s, 2H, ArH), 7.25-7.38 (m, 6H, ArH), 8.10 (s, 1H, ArH);  $^{13}\text{C}$  NMR (150 MHz,  $\text{CDCl}_3$ ):  $\delta = 20.8, 21.1, 103.4, 107.6, 117.1, 118.5, 123.0, 123.7, 123.7, 126.3, 130.2, 130.2, 133.6, 133.8, 134.2, 137.8, 148.6, 152.4, 173.7$ . HRMS (TOF  $\text{ES}^+$ ):  $m/z$  calcd for  $\text{C}_{19}\text{H}_{16}\text{NO}_2$  [(M+H) $^+$ ], 290.1176; found, 290.1172.

#### 6,8-Dichloro-1-(*p*-tolyl)chromeno[2,3-*b*]pyrrol-4(1*H*)-one (3b')

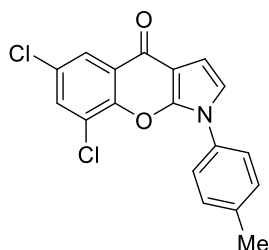

Yellow solid (127mg, 74%); Mp: 154.4-155.4 °C; IR (KBr): 3433, 3116, 1665, 1595, 1535, 1535, 1447, 1416, 1335, 1308, 1178, 1114, 945, 871, 809, 742, 720, 653  $\text{cm}^{-1}$ ;  $^1\text{H}$  NMR (600 MHz,  $\text{CDCl}_3$ ):  $\delta = 2.47$  (s, 3H,  $\text{CH}_3$ ), 6.84 (d,  $J = 3.6$  Hz, 1H, ArH), 6.95 (d,  $J = 3.6$  Hz, 1H, ArH), 7.38 (d,  $J = 8.0$  Hz, 2H, ArH), 7.55 (d,  $J = 8.1$  Hz, 2H, ArH), 7.68 (d,  $J = 2.2$  Hz, 1H, ArH), 8.28 (d,  $J = 2.3$  Hz, 1H, ArH);  $^{13}\text{C}$  NMR (150 MHz,  $\text{CDCl}_3$ ):  $\delta = 21.1, 103.6, 107.4, 119.1, 123.0, 123.0, 123.4, 125.0, 125.5, 130.0, 130.3, 130.3, 132.6, 133.4, 137.9, 147.8, 148.4, 171.3$ . HRMS (TOF  $\text{ES}^+$ ):  $m/z$  calcd for  $\text{C}_{18}\text{H}_{12}\text{Cl}_2\text{NO}_2$  [(M+H) $^+$ ], 344.0240; found, 344.0238.

#### 6-Fluoro-1-(4-methoxyphenyl)chromeno[2,3-*b*]pyrrol-4(1*H*)-one (3c')

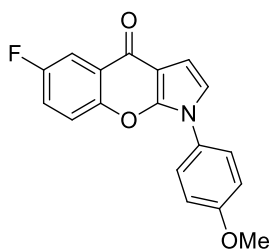

Yellow solid (122mg, 79%); Mp: 116.3-116.8 °C; IR (KBr): 3473, 3069, 1666, 1623, 1532, 1472, 1307, 1252, 1180, 1136, 1022, 884, 831, 765, 635  $\text{cm}^{-1}$ ;  $^1\text{H}$  NMR (600 MHz,  $\text{CDCl}_3$ ):  $\delta$  = 3.91 (s, 3H,  $\text{CH}_3$ ), 6.82 (d,  $J$  = 2.5 Hz, 2H, ArH), 7.08 (d,  $J$  = 8.7 Hz, 2H, ArH), 7.35 (d,  $J$  = 7.0 Hz, 1H, ArH), 7.43-7.49 (m, 3H, ArH), 8.04-8.05 (m, 1H, ArH);  $^{13}\text{C}$  NMR (150 MHz,  $\text{CDCl}_3$ ):  $\delta$  = 55.6, 103.0, 107.0, 111.9 (d,  $J$  = 22.5 Hz), 114.9, 114.9, 119.1 (d,  $J$  = 9.0 Hz), 119.3, 120.3 (d,  $J$  = 25.5 Hz), 124.7, 125.5, 125.5, 129.0, 148.7, 150.1, 159.2 (d,  $J$  = 243 Hz), 159.3, 172.5;  $^{19}\text{F}$  NMR (564 MHz,  $\text{CDCl}_3$ ):  $\delta$  = -116.9. HRMS (TOF  $\text{ES}^+$ ):  $m/z$  calcd for  $\text{C}_{18}\text{H}_{13}\text{FNO}_3$  [(M+H) $^+$ ], 310.0874; found, 310.0870.

#### 6-Chloro-1-(4-methoxyphenyl)chromeno[2,3-*b*]pyrrol-4(1*H*)-one (3d')

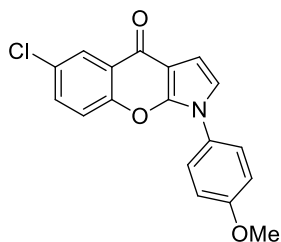

Yellow solid (137mg, 84%); Mp: 108.4-109.7 °C; IR (KBr): 3449, 1651, 1604, 1522, 1462, 1307, 1251, 1184, 1112, 1021, 891, 830, 720, 658  $\text{cm}^{-1}$ ;  $^1\text{H}$  NMR (600 MHz,  $\text{CDCl}_3$ ):  $\delta$  = 3.91 (s, 3H,  $\text{OCH}_3$ ), 6.82 (s, 2H, ArH), 7.08 (d,  $J$  = 8.2 Hz, 2H, ArH), 7.40 (d,  $J$  = 8.8 Hz, 1H, ArH), 7.48 (d,  $J$  = 8.2 Hz, 2H, ArH), 7.56 (d,  $J$  = 8.8 Hz, 1H, ArH), 8.35 (s, 1H, ArH);  $^{13}\text{C}$  NMR (150 MHz,  $\text{CDCl}_3$ ):  $\delta$  = 55.6, 103.2, 107.3, 114.9, 114.9, 119.0, 119.4, 124.5, 125.5, 125.5, 126.2, 128.9, 130.3, 132.5, 148.5, 152.4, 159.3, 172.1. HRMS (TOF  $\text{ES}^+$ ):  $m/z$  calcd for  $\text{C}_{18}\text{H}_{13}\text{ClNO}_3$  [(M+H) $^+$ ], 326.0578; found, 326.0574.

#### 1-(4-Methoxyphenyl)chromeno[2,3-*b*]pyrrol-4(1*H*)-one (3e')

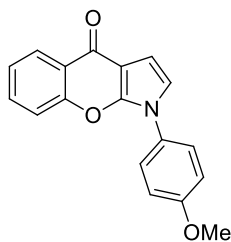

Yellow solid (99mg, 68%); Mp: 102.3-103.4 °C; IR (KBr): 3418, 3118, 1661, 1610, 1527, 1508, 1459, 1355, 1251, 1176, 1106, 1020, 955, 830, 755  $\text{cm}^{-1}$ ;  $^1\text{H}$  NMR (600 MHz,  $\text{CDCl}_3$ ):  $\delta$  = 3.92 (s, 3H,  $\text{CH}_3$ ), 6.83 (d,  $J$  = 3.4 Hz, 1H, ArH),

6.86 (d,  $J = 3.4$  Hz, 1H, ArH), 7.09 (d,  $J = 8.7$  Hz, 2H, ArH), 7.42-7.47 (m, 2H, ArH), 7.50 (d,  $J = 8.7$  Hz, 2H, ArH), 7.64 (t,  $J = 7.3$  Hz, 1H, ArH), 8.43 (d,  $J = 7.8$  Hz, 1H, ArH);  $^{13}\text{C}$  NMR (150 MHz,  $\text{CDCl}_3$ ):  $\delta = 55.6, 103.2, 107.4, 114.8, 114.8, 117.4, 118.9, 123.4, 124.4, 125.5, 125.5, 126.8, 129.2, 132.5, 148.6, 154.1, 159.2, 173.5$ . HRMS (TOF  $\text{ES}^+$ ):  $m/z$  calcd for  $\text{C}_{18}\text{H}_{14}\text{NO}_3$  [(M+H) $^+$ ], 292.0968; found, 292.0966.

#### 1-(4-Methoxyphenyl)-6-methylchromeno[2,3-*b*]pyrrol-4(1*H*)-one (3f')

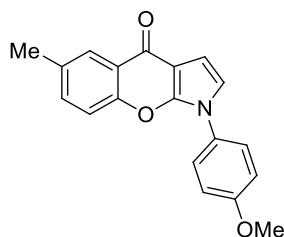

Yellow solid (111mg, 73%); Mp: 84.2-85.3 °C; IR (KBr): 3426, 1649, 1613, 1521, 1475, 1307, 1249, 1183, 1117, 1028, 835, 720, 681, 639  $\text{cm}^{-1}$ ;  $^1\text{H}$  NMR (500 MHz,  $\text{CDCl}_3$ ):  $\delta = 2.46$  (s, 3H,  $\text{CH}_3$ ), 3.89 (s, 3H,  $\text{OCH}_3$ ), 6.79 (d,  $J = 3.7$  Hz, 1H, ArH), 6.82 (d,  $J = 3.7$  Hz, 1H, ArH), 7.04-7.07 (m, 2H, ArH), 7.32 (d,  $J = 8.5$  Hz, 1H, ArH), 7.40-7.42 (m, 1H, ArH), 7.45-7.48 (m, 2H, ArH), 8.18 (d,  $J = 1.2$  Hz, 1H, ArH);  $^{13}\text{C}$  NMR (150 MHz,  $\text{CDCl}_3$ ):  $\delta = 20.8, 55.6, 103.2, 107.4, 114.8, 114.8, 117.1, 118.8, 123.0, 125.4, 125.4, 126.3, 129.2, 133.6, 134.2, 148.7, 152.4, 159.1, 173.6$ . HRMS (TOF  $\text{ES}^+$ ):  $m/z$  calcd for  $\text{C}_{19}\text{H}_{16}\text{NO}_3$  [(M+H) $^+$ ], 306.1125; found, 306.1121.

#### 1-(4-(Trifluoromethyl)phenyl)chromeno[2,3-*b*]pyrrol-4(1*H*)-one (3g')

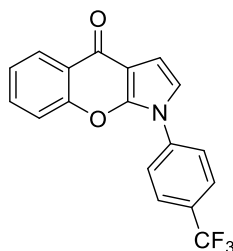

Yellow solid (118 mg, 72%); Mp: 167.8-168.9 °C; IR (KBr): 3446, 1659, 1611, 1518, 1456, 1328, 1163, 1108, 1067, 1018, 843, 764, 686  $\text{cm}^{-1}$ ;  $^1\text{H}$  NMR (600 MHz,  $\text{CDCl}_3$ ):  $\delta = 6.90$  (d,  $J = 3.7$  Hz, 1H, ArH), 6.92 (d,  $J = 3.7$  Hz, 1H, ArH), 7.43-7.45 (m, 1H, ArH), 7.47-7.49 (m, 1H, ArH), 7.65-7.68 (m, 1H, ArH), 7.76 (d,  $J = 8.4$  Hz, 2H, ArH), 7.85 (d,  $J = 8.4$  Hz, 2H, ArH), 8.40-8.41 (m, 1H, ArH);  $^{13}\text{C}$  NMR (150 MHz,  $\text{CDCl}_3$ ):  $\delta = 104.6, 108.1, 117.4, 117.9, 123.7$  (q,  $J_1 = 271.5$  Hz), 123.4, 123.6, 123.6, 124.8, 126.9-127.0 (m,  $J_3 = 4.5$  Hz), 126.9-127.0 (q,  $J_3 = 4.5$  Hz), 127.1, 129.4-130.1 (q,  $J_2 = 33.0$  Hz), 132.9, 139.2, 148.4, 154.1, 173.4;  $^{19}\text{F}$  NMR (564 MHz,  $\text{CDCl}_3$ ):  $\delta = -62.5$ . HRMS (TOF  $\text{ES}^+$ ):  $m/z$  calcd for  $\text{C}_{18}\text{H}_{11}\text{F}_3\text{NO}_2$  [(M+H) $^+$ ], 330.0736; found, 330.0740.

### 1-Benzyl-6-chlorochromeno[2,3-*b*]pyrrol-4(1*H*)-one (3h')

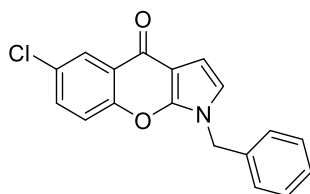

Yellow solid (117mg, 76%); Mp: 95.6-96.1 °C; IR (KBr): 3467, 3117, 2370, 1651, 1609, 1542, 1500, 1460, 1351, 1278, 1212, 1180, 1121, 1082, 905, 822, 738, 697  $\text{cm}^{-1}$ ;  $^1\text{H}$  NMR (500 MHz,  $\text{CDCl}_3$ ):  $\delta$  = 5.26 (s, 2H,  $\text{CH}_2$ ), 6.60 (d,  $J$  = 3.4 Hz, 1H, ArH), 6.71 (d,  $J$  = 3.3 Hz, 1H, ArH), 7.24 (d,  $J$  = 7.2 Hz, 2H, ArH), 7.35-7.44 (m, 4H, ArH), 7.56 (t,  $J$  = 7.4 Hz, 1H, ArH), 8.36 (s, 1H, ArH);  $^{13}\text{C}$  NMR (125 MHz,  $\text{CDCl}_3$ ):  $\delta$  = 48.7, 102.8, 106.6, 118.6, 118.9, 124.6, 126.3, 127.4, 127.4, 128.4, 129.1, 129.1, 130.2, 132.4, 135.5, 149.2, 152.3, 171.9. HRMS (TOF  $\text{ES}^+$ ):  $m/z$  calcd for  $\text{C}_{18}\text{H}_{13}\text{ClNO}_2$  [( $\text{M}+\text{H}$ ) $^+$ ], 310.0629; found, 310.0623.

### 1-Benzylchromeno[2,3-*b*]pyrrol-4(1*H*)-one (3i')

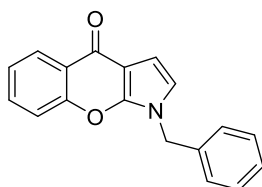

Yellow solid (97mg, 71%); Mp: 64.4-65.1 °C; IR (KBr): 3445, 3121, 1648, 1614, 1544, 1502, 1350, 1288, 1205, 1105, 917, 869, 756, 696, 611  $\text{cm}^{-1}$ ;  $^1\text{H}$  NMR (500 MHz,  $\text{CDCl}_3$ ):  $\delta$  = 5.27 (s, 2H,  $\text{CH}_2$ ), 6.59 (s, 1H, ArH), 6.74 (s, 1H, ArH), 7.25 (d,  $J$  = 7.3 Hz, 2H, ArH), 7.34-7.43 (m, 4H, ArH), 7.49 (d,  $J$  = 8.4 Hz, 1H, ArH), 7.64 (t,  $J$  = 7.6 Hz, 1H, ArH), 8.42 (d,  $J$  = 7.9 Hz, 1H, ArH);  $^{13}\text{C}$  NMR (125 MHz,  $\text{CDCl}_3$ ):  $\delta$  = 48.6, 102.8, 106.7, 117.2, 118.2, 123.4, 124.4, 126.9, 127.4, 127.4, 128.3, 128.9, 129.0, 132.4, 135.7, 149.3, 154.0, 173.3. HRMS (TOF  $\text{ES}^+$ ):  $m/z$  calcd for  $\text{C}_{18}\text{H}_{14}\text{NO}_2$  [( $\text{M}+\text{H}$ ) $^+$ ], 276.1019; found, 276.1025.

### 1-Benzyl-6-methylchromeno[2,3-*b*]pyrrol-4(1*H*)-one (3j')

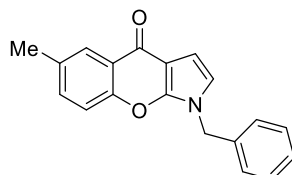

Yellow solid (92mg, 64%); Mp: 86.7-87.3 °C; IR (KBr): 3436, 3028, 1653, 1614, 1538, 1499, 1285, 1206, 1115, 820, 761, 701, 601  $\text{cm}^{-1}$ ;  $^1\text{H}$  NMR (500 MHz,  $\text{CDCl}_3$ ):  $\delta$  = 2.48 (s, 3H,  $\text{CH}_3$ ), 5.26 (s, 2H,  $\text{CH}_2$ ), 6.57 (s, 1H, ArH), 6.74 (s, 1H, ArH), 7.26 (d,  $J$  = 14.1 Hz, 2H, ArH), 7.37-7.44 (m, 5H, ArH), 8.20 (s, 1H, ArH);  $^{13}\text{C}$  NMR (125 MHz,  $\text{CDCl}_3$ ):  $\delta$  = 20.9, 48.6, 102.8, 106.6, 117.0, 118.1, 123.0, 126.4, 127.4, 127.4, 128.3, 129.0, 129.0, 133.5, 134.2, 135.8, 149.5, 152.3, 173.5.



HRMS (TOF ES<sup>+</sup>):  $m/z$  calcd for C<sub>19</sub>H<sub>16</sub>NO<sub>2</sub> [(M+H)<sup>+</sup>], 290.1176; found, 290.1181.

### X-ray Structure and Data<sup>2</sup> of 3d'

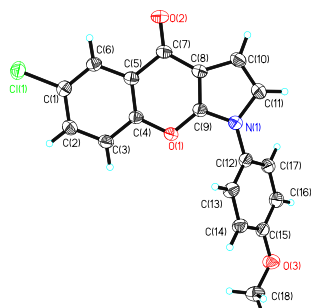

**Figure S1.** X-Ray crystal structure of **3d'**, ellipsoids is drawn at the 30% probability level.

**Table S1.** Crystal data and structure refinement for **3d'**

|                                   |                                                   |                  |
|-----------------------------------|---------------------------------------------------|------------------|
| Identification code               | 1                                                 |                  |
| Empirical formula                 | C <sub>18</sub> H <sub>12</sub> ClNO <sub>3</sub> |                  |
| Formula weight                    | 325.74                                            |                  |
| Temperature                       | 301(2) K                                          |                  |
| Crystal system                    | Monoclinic                                        |                  |
| Space group                       | P2(1)/c                                           |                  |
| Unit cell dimensions              | a = 15.6982(9) Å                                  | α = 90 °         |
|                                   | b = 12.4059(8) Å                                  | β = 100.261(2) ° |
|                                   | c = 7.6199(5) Å                                   | γ = 90 °         |
| Volume                            | 1460.24(16) Å <sup>3</sup>                        |                  |
| Z                                 | 4                                                 |                  |
| Density (calculated)              | 1.482 g/cm <sup>3</sup>                           |                  |
| Absorption coefficient            | 0.277 mm <sup>-1</sup>                            |                  |
| F(000)                            | 672                                               |                  |
| Theta range for data collection   | 2.105 to 25.139 °                                 |                  |
| Index ranges                      | -18 ≤ h ≤ 18, -14 ≤ k ≤ 14, -9 ≤ l ≤ 9            |                  |
| Reflections collected             | 33858                                             |                  |
| Reflections unique                | 2607 [R(int) = 0.0984, R(sigma) = 0.0549]         |                  |
| Refinement method                 | Full-matrix least-squares on F <sup>2</sup>       |                  |
| Data / restraints / parameters    | 2607 / 0 / 209                                    |                  |
| Goodness-of-fit on F <sup>2</sup> | 1.091                                             |                  |
| Final R indexes [I ≥ 2σ(I)]       | R <sub>1</sub> = 0.0437, wR <sub>2</sub> = 0.1133 |                  |
| Final R indexes (all data)        | R <sub>1</sub> = 0.0635, wR <sub>2</sub> = 0.1412 |                  |
| Extinction coefficient            | n/a                                               |                  |
| Largest diff. peak and hole       | 0.189 and -0.248 e.Å <sup>-3</sup>                |                  |

**Table S2. Bond Lengths for 3d'**

| Atom  | Atom  | Length/Å | Atom  | Atom   | Length/Å |
|-------|-------|----------|-------|--------|----------|
| Cl(1) | C(1)  | 1.736(2) | C(7)  | C(8)   | 1.432(3) |
| N(1)  | C(9)  | 1.355(3) | C(8)  | C(9)   | 1.372(3) |
| N(1)  | C(11) | 1.397(3) | C(8)  | C(10)  | 1.430(3) |
| N(1)  | C(12) | 1.430(3) | C(10) | C(11)  | 1.343(4) |
| O(1)  | C(9)  | 1.345(3) | C(10) | H(10)  | 0.9300   |
| O(1)  | C(4)  | 1.383(3) | C(11) | H(11)  | 0.9300   |
| O(2)  | C(7)  | 1.234(3) | C(12) | C(13)  | 1.373(3) |
| O(3)  | C(15) | 1.369(3) | C(12) | C(17)  | 1.382(3) |
| O(3)  | C(18) | 1.422(3) | C(13) | C(14)  | 1.391(3) |
| C(1)  | C(6)  | 1.367(3) | C(13) | H(13)  | 0.9300   |
| C(1)  | C(2)  | 1.392(3) | C(14) | C(15)  | 1.375(3) |
| C(2)  | C(3)  | 1.373(3) | C(14) | H(14)  | 0.9300   |
| C(2)  | H(2)  | 0.9300   | C(15) | C(16)  | 1.384(4) |
| C(3)  | C(4)  | 1.386(3) | C(16) | C(17)  | 1.373(4) |
| C(3)  | H(3)  | 0.9300   | C(16) | H(16)  | 0.9300   |
| C(4)  | C(5)  | 1.389(3) | C(17) | H(17)  | 0.9300   |
| C(5)  | C(6)  | 1.401(3) | C(18) | H(18A) | 0.9600   |
| C(5)  | C(7)  | 1.484(3) | C(18) | H(18B) | 0.9600   |
| C(6)  | H(6)  | 0.9300   | C(18) | H(18C) | 0.9600   |

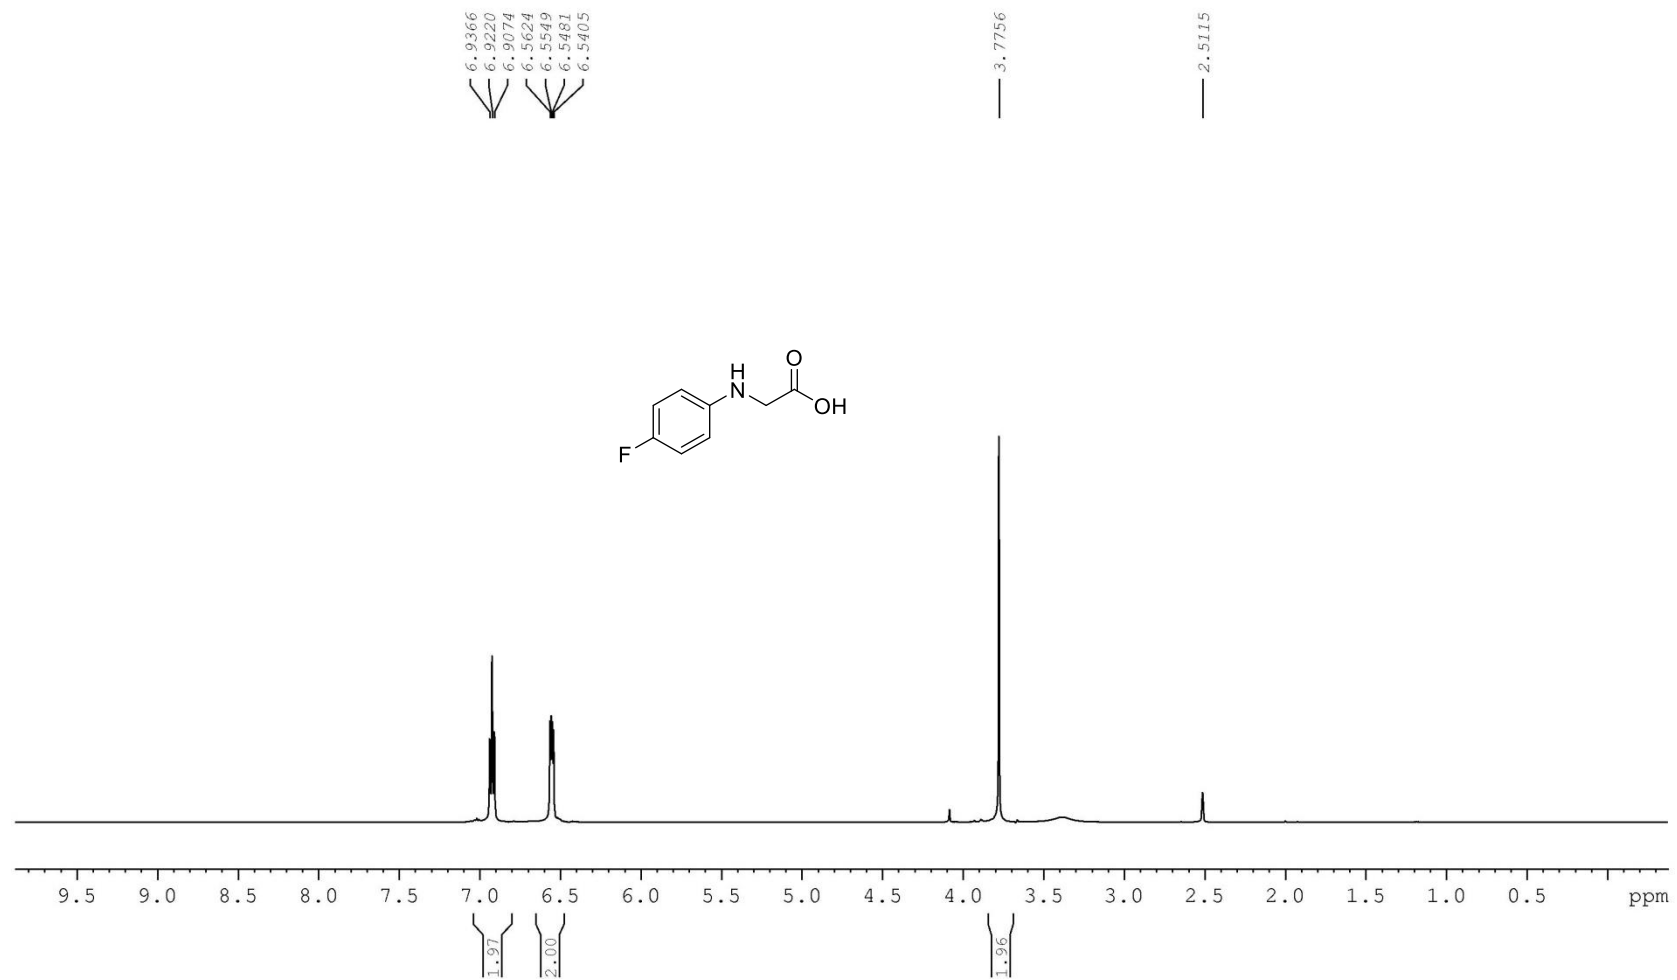

**Figure S2.** <sup>1</sup>H NMR (600 MHz, DMSO-*d*<sub>6</sub>) spectra of compound 2a

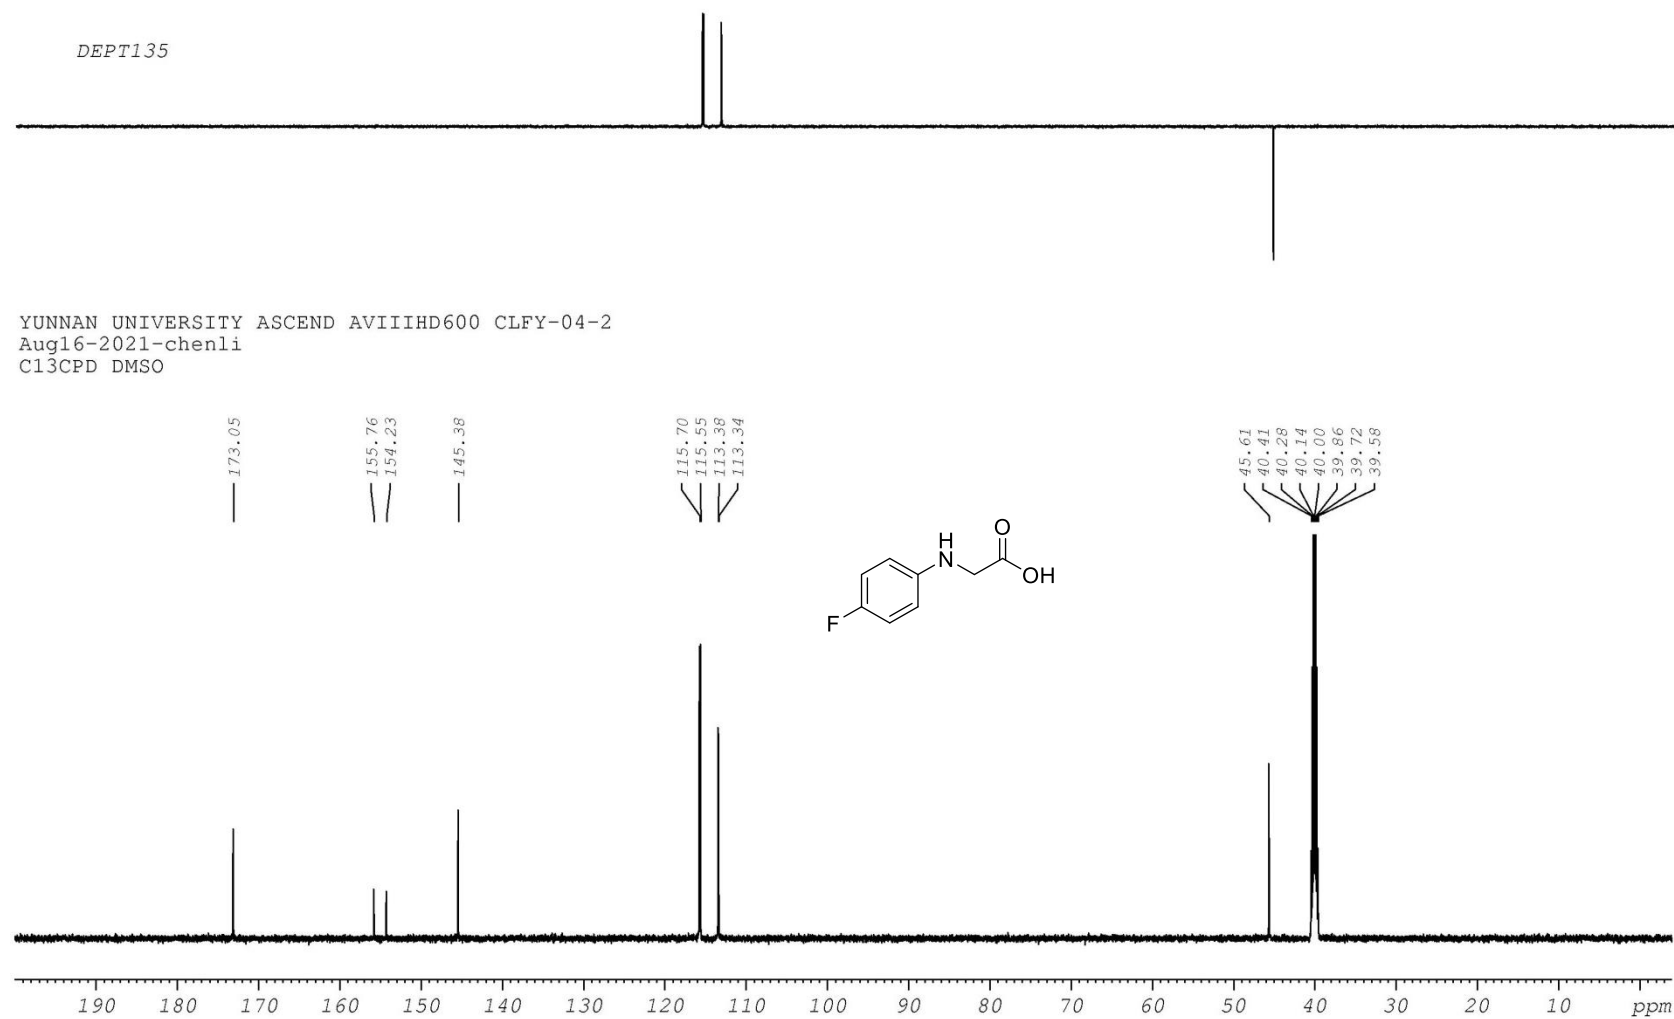

Figure S3.  $^{13}\text{C}$  NMR (150 MHz,  $\text{DMSO-}d_6$ ) spectra of compound 2a

YUNNAN UNIVERSITY ASCEND AVIIIHD600 CLFY-04-2  
Aug16-2021-chenli  
F19CPD DMSO

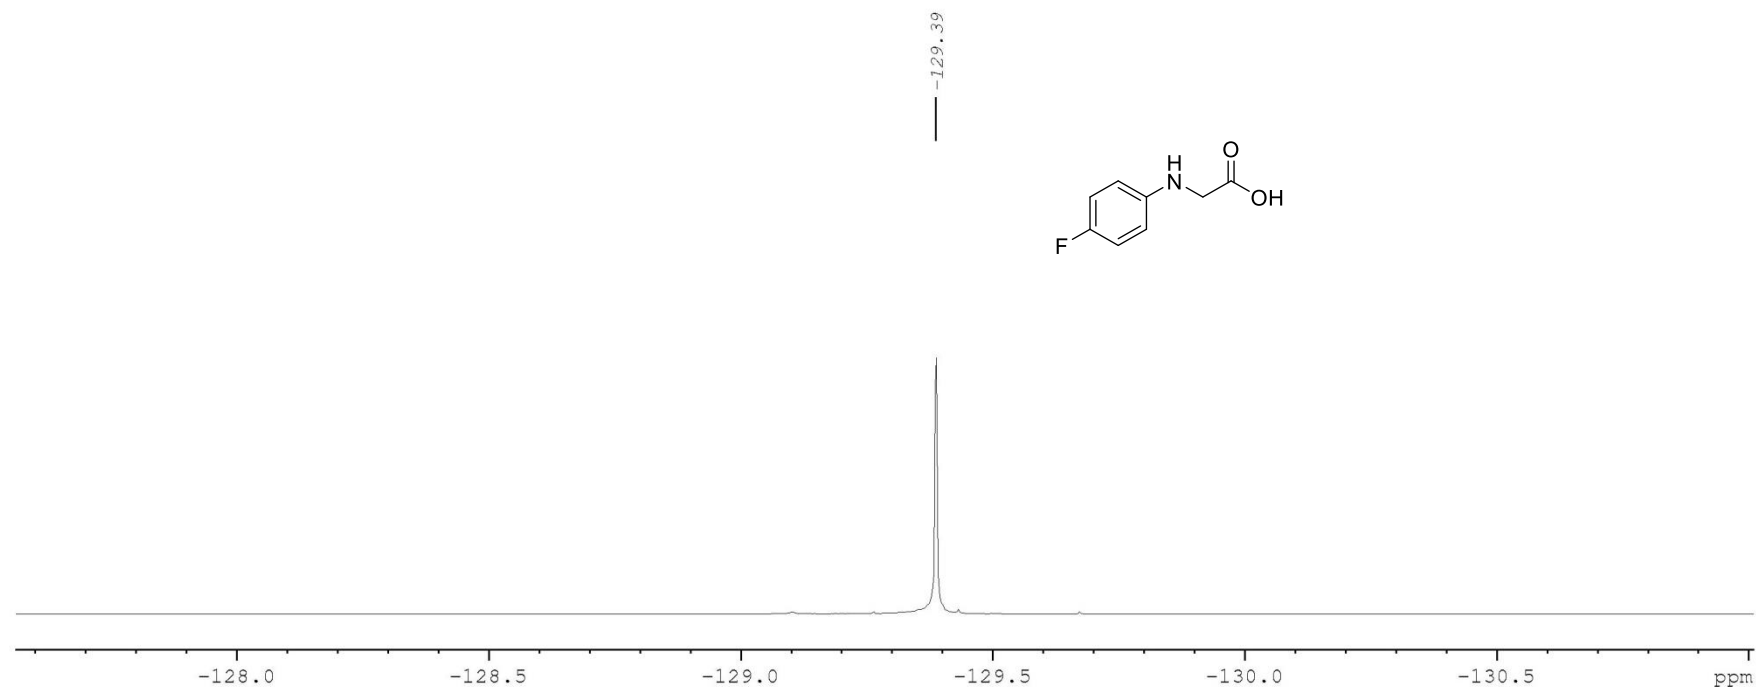

**Figure S4.**  $^{19}\text{F}$  NMR (564 MHz,  $\text{DMSO-}d_6$ ) spectra of compound **2a**

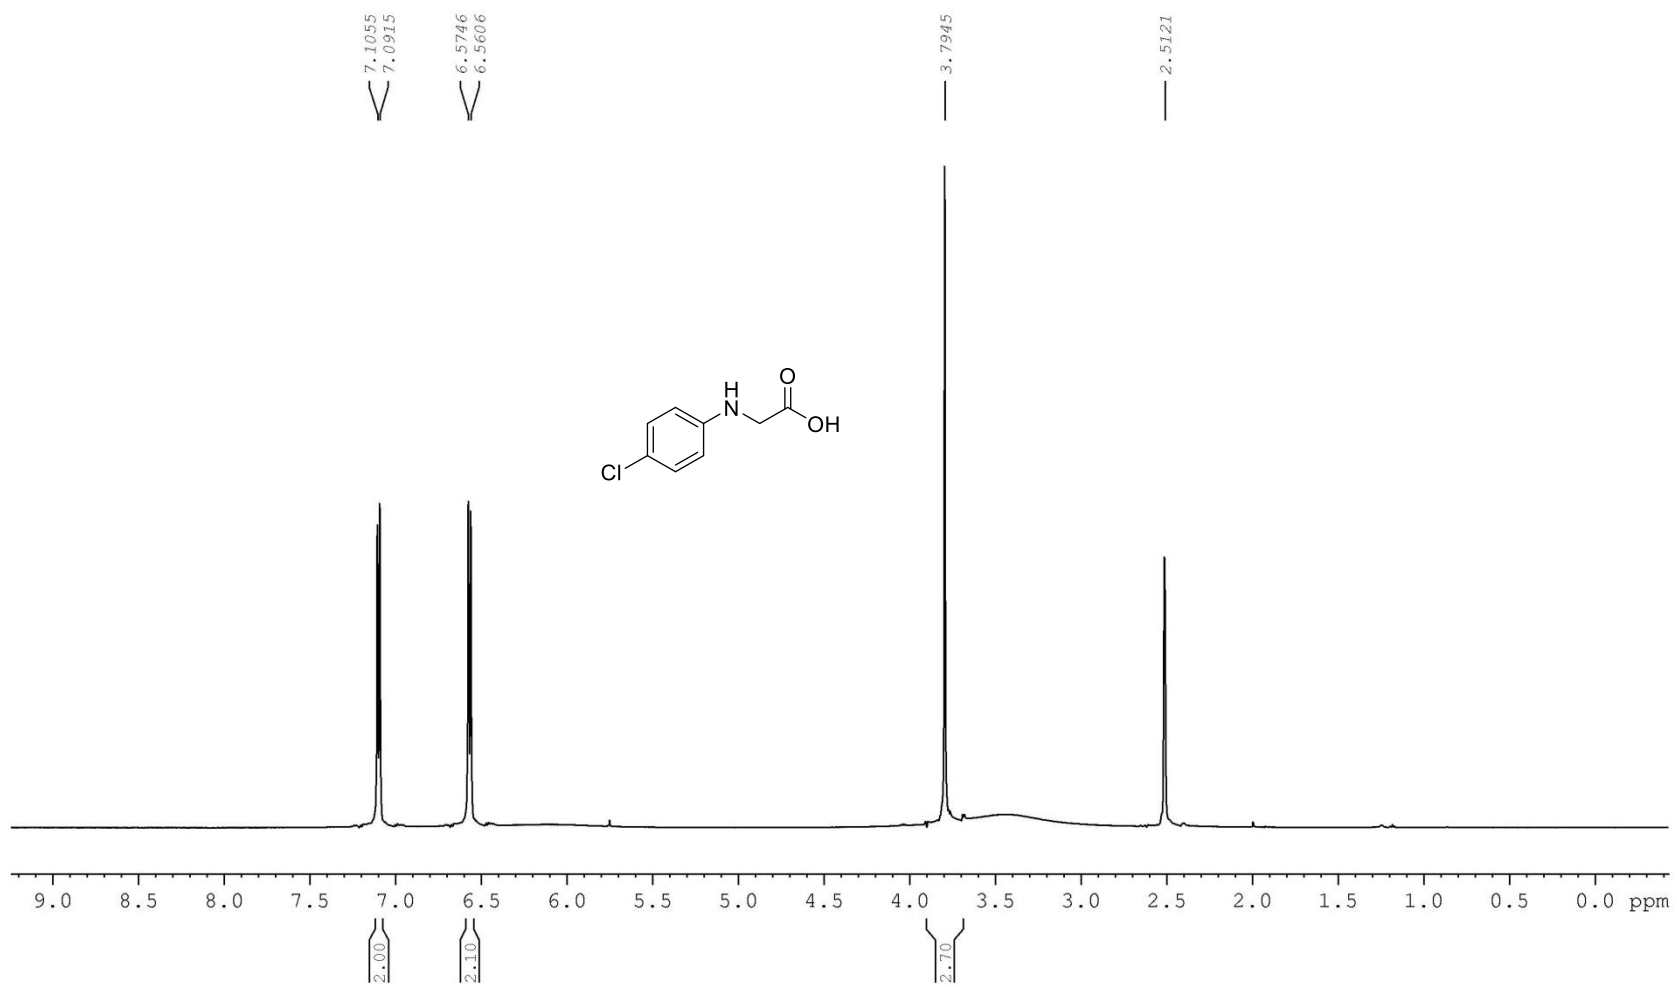

**Figure S5.** <sup>1</sup>H NMR (600 MHz, DMSO-*d*<sub>6</sub>) spectra of compound **2b**

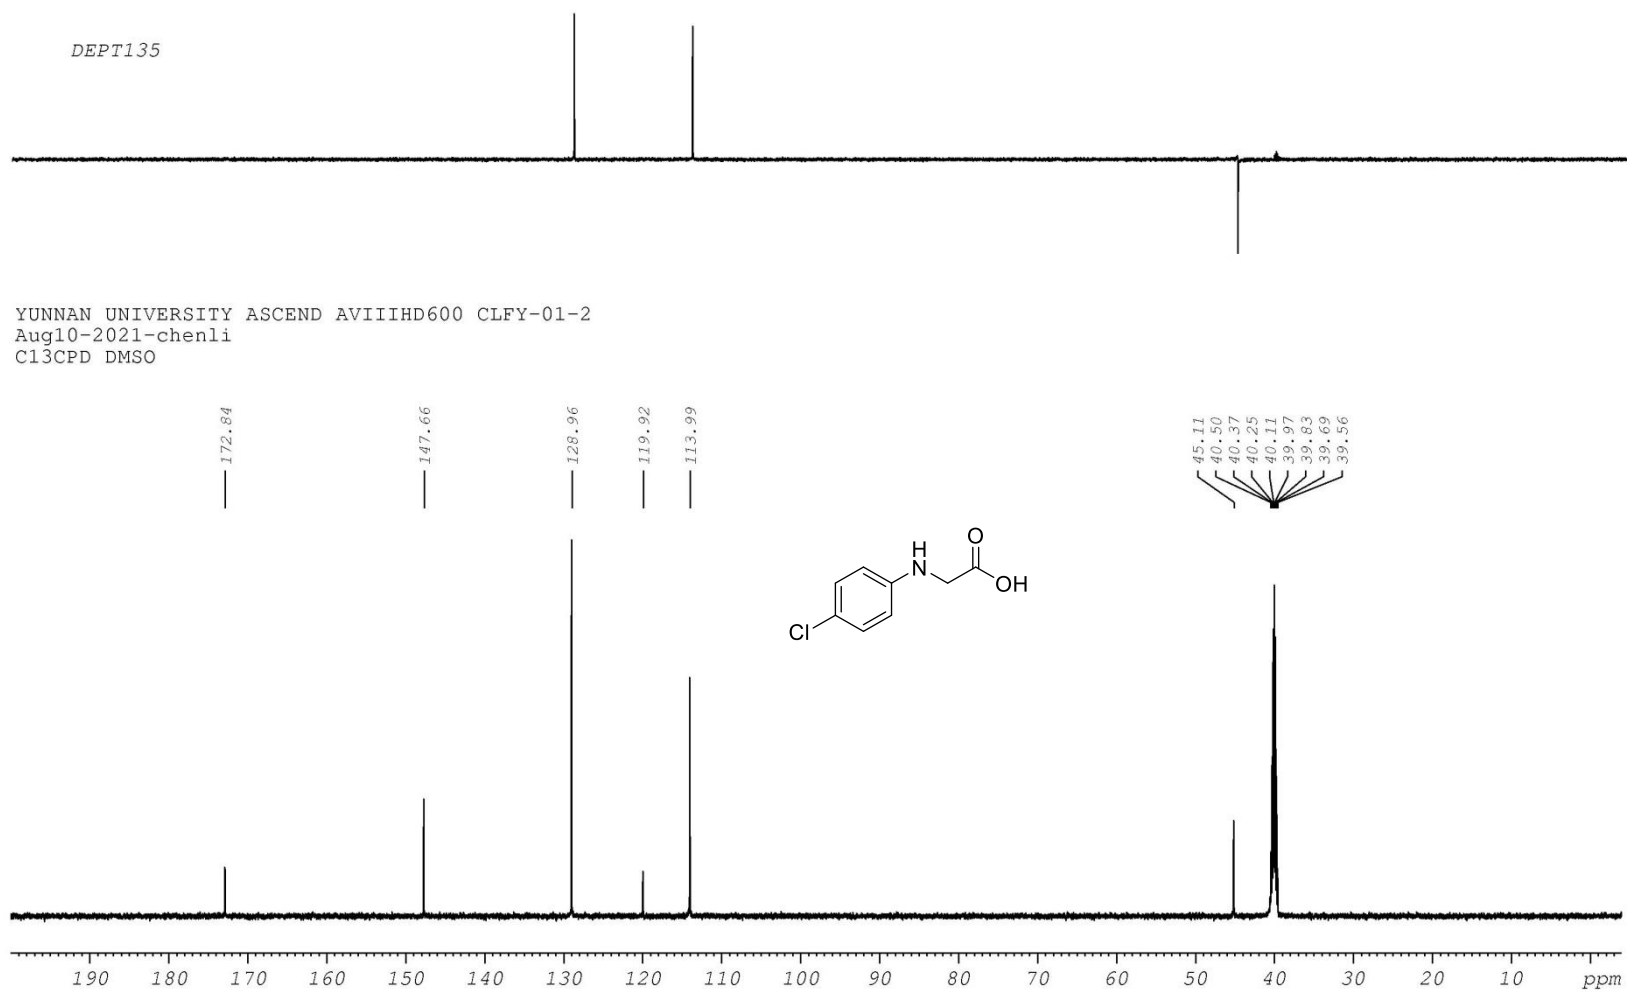

Figure S6.  $^{13}\text{C}$  NMR (150 MHz,  $\text{DMSO-}d_6$ ) spectra of compound **2b**

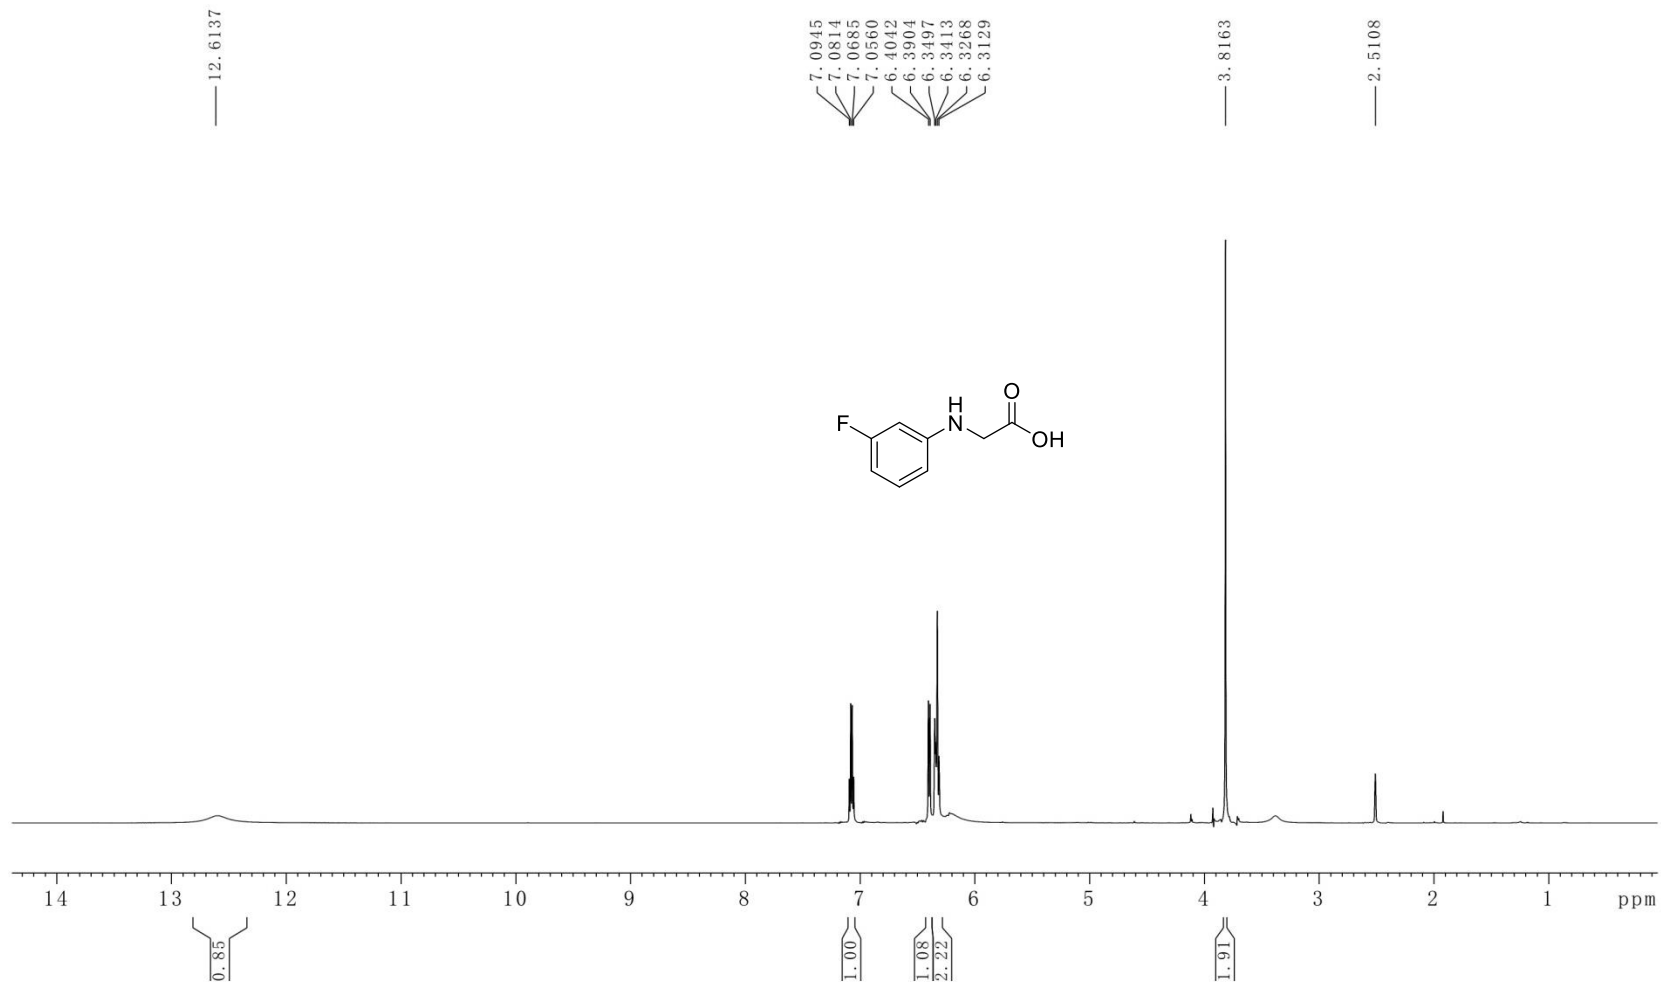

**Figure S7.** <sup>1</sup>H NMR (600 MHz, DMSO-*d*<sub>6</sub>) spectra of compound **2c**



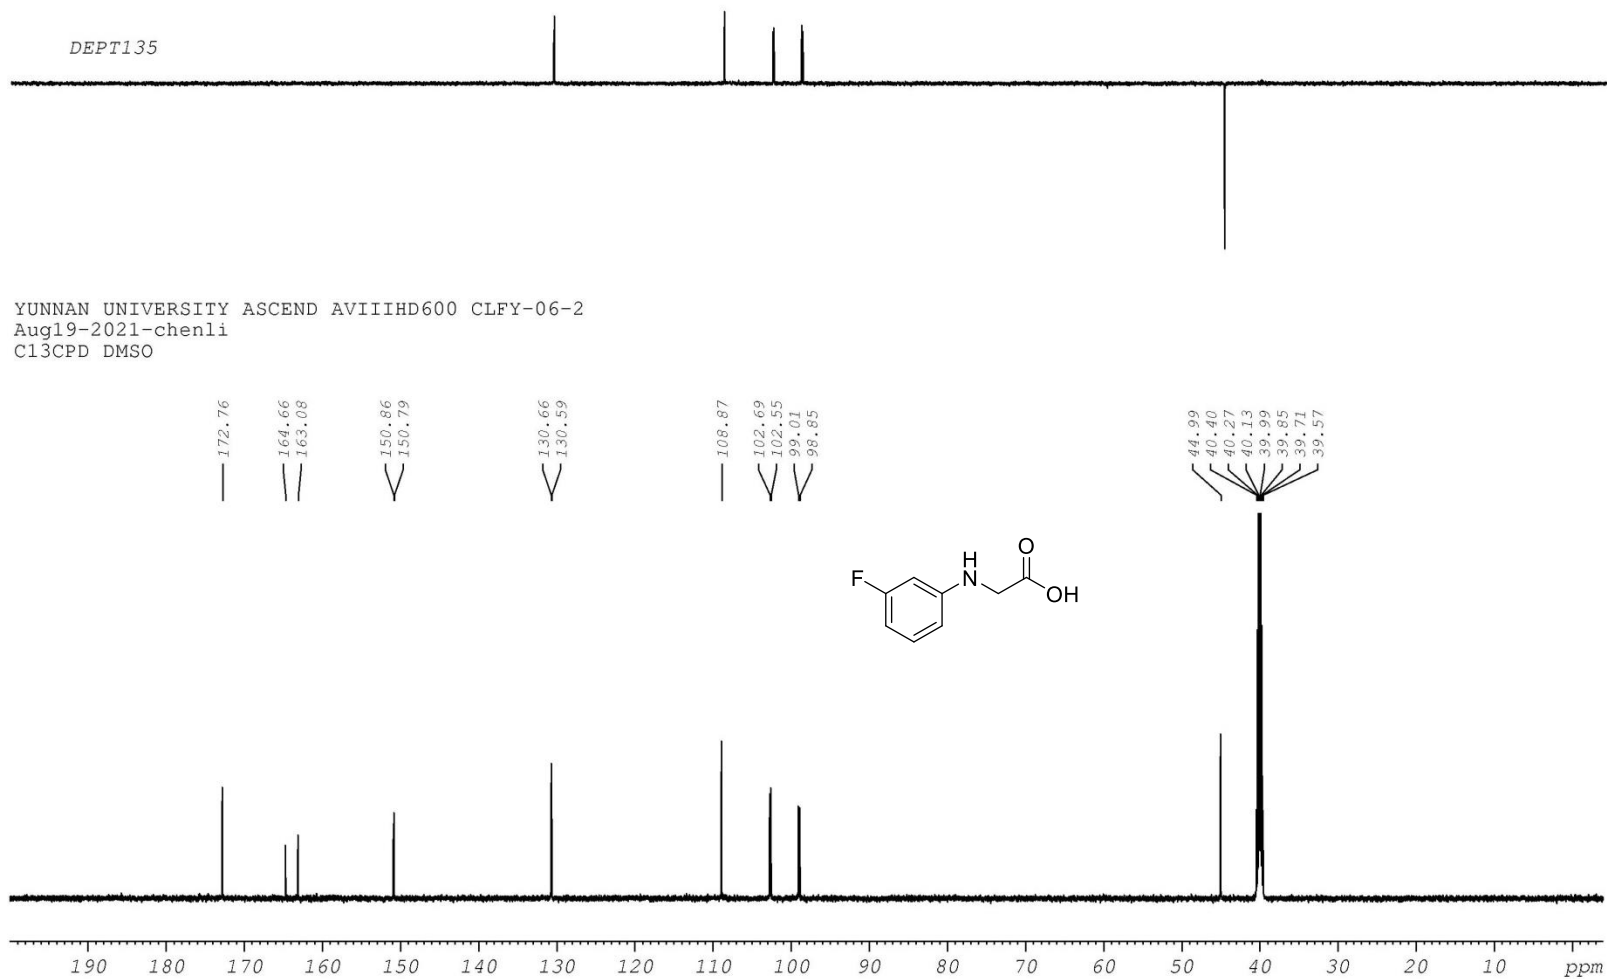

Figure S8.  $^{13}\text{C}$  NMR (150 MHz,  $\text{DMSO-}d_6$ ) spectra of compound **2c**

F19CPD DMSO

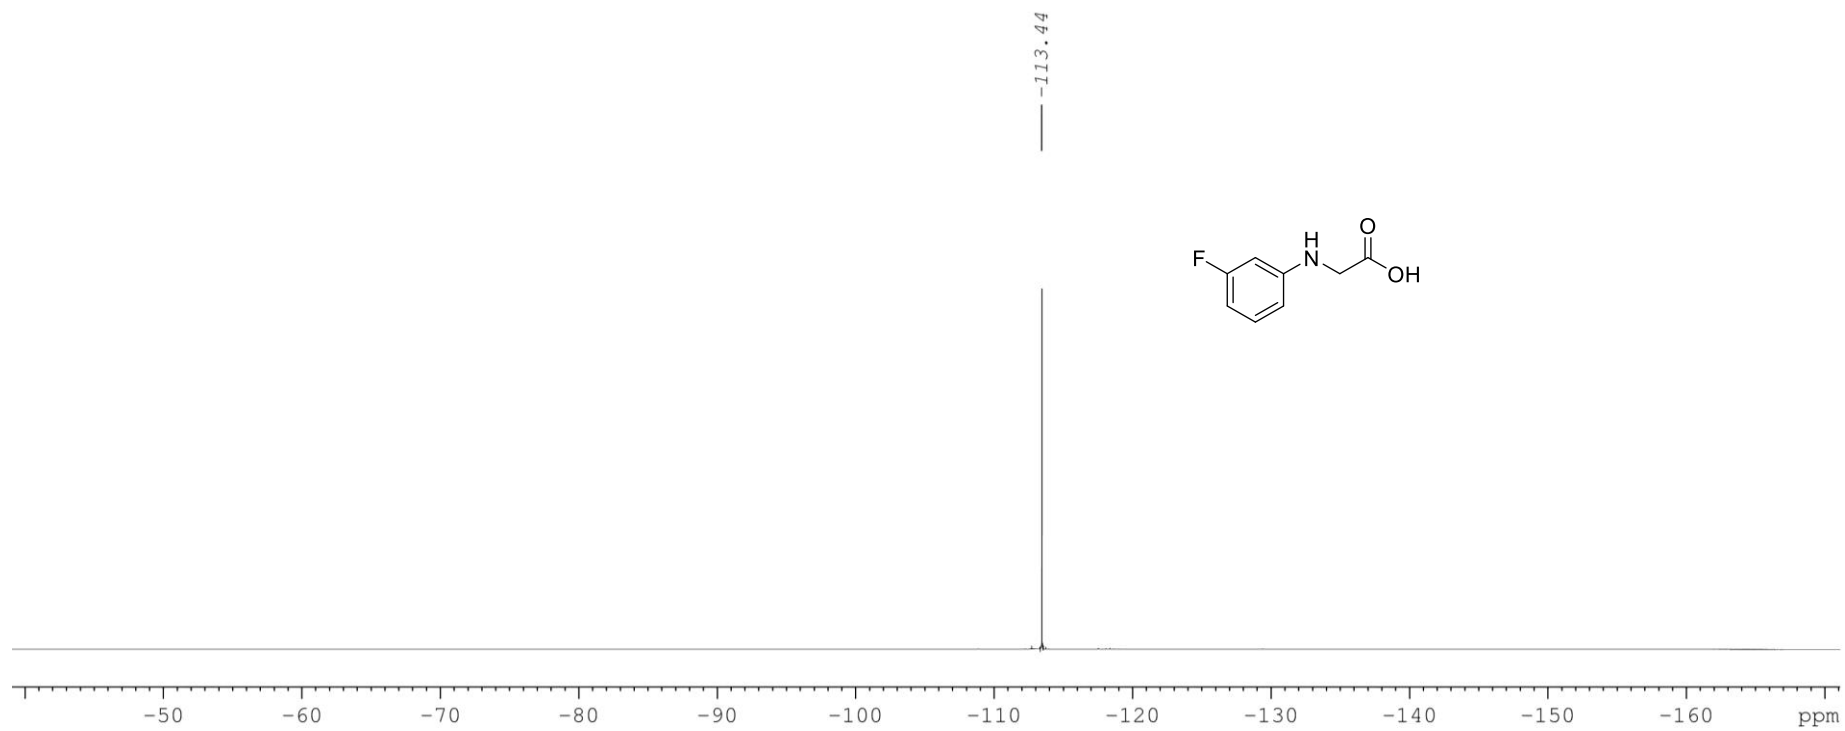

**Figure S9.**  $^{19}\text{F}$  NMR (564 MHz,  $\text{DMSO-}d_6$ ) spectra of compound **2c**

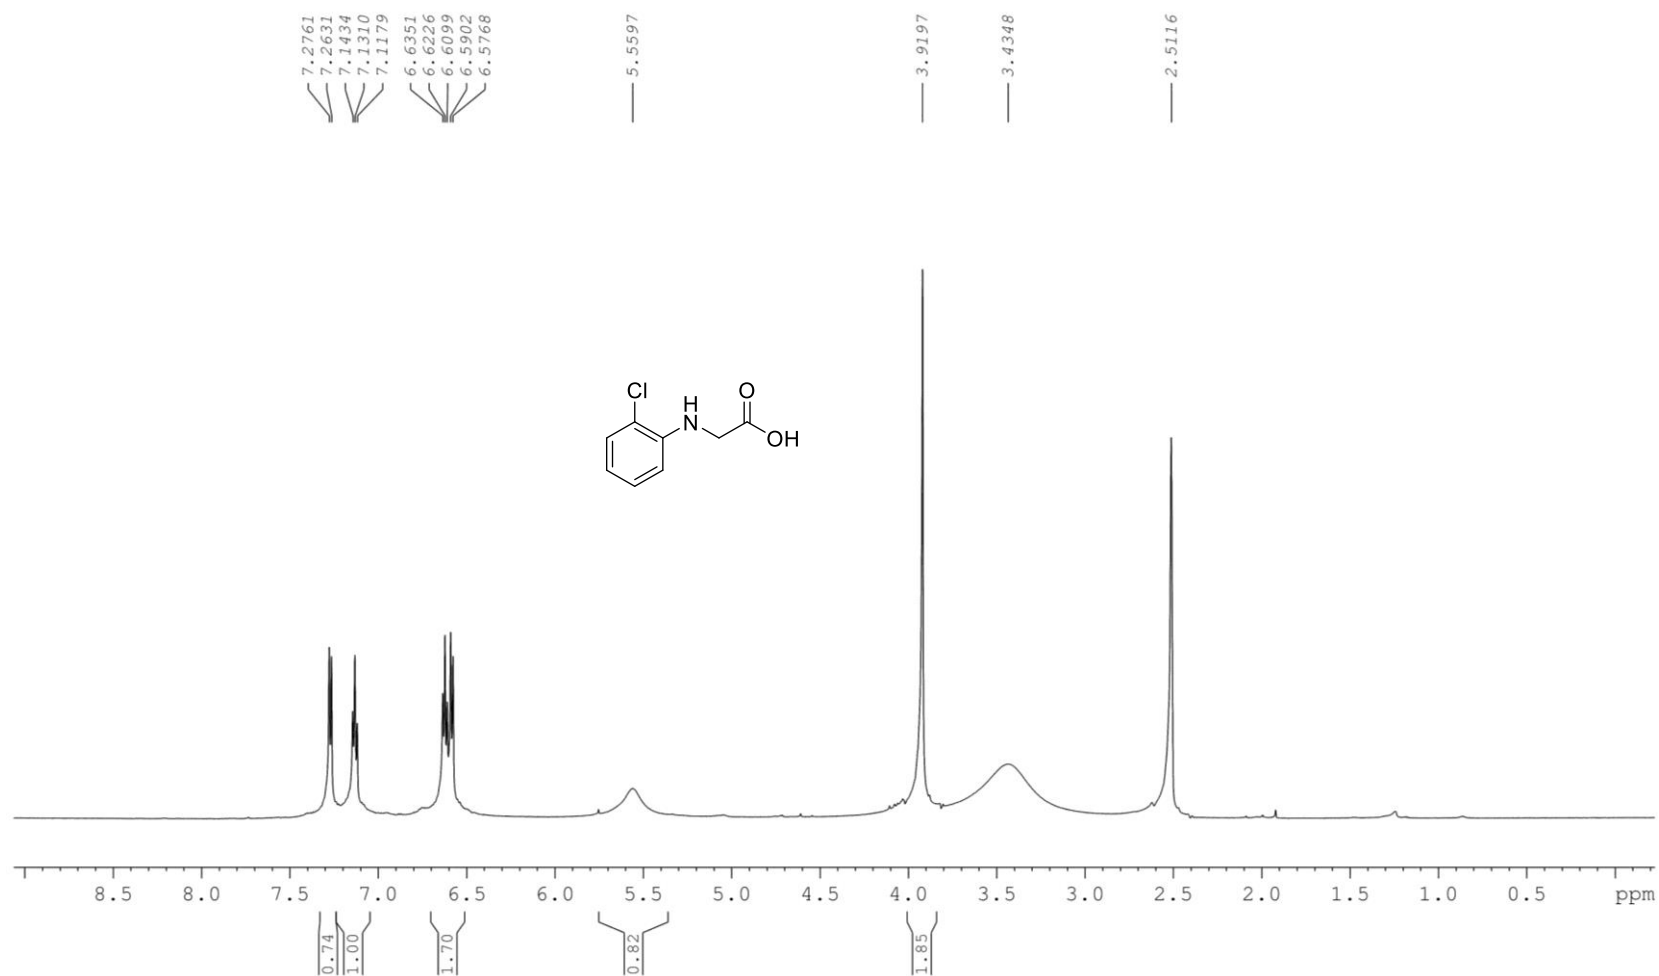

**Figure S10.** <sup>1</sup>H NMR (600 MHz, DMSO-*d*<sub>6</sub>) spectra of compound **2d**

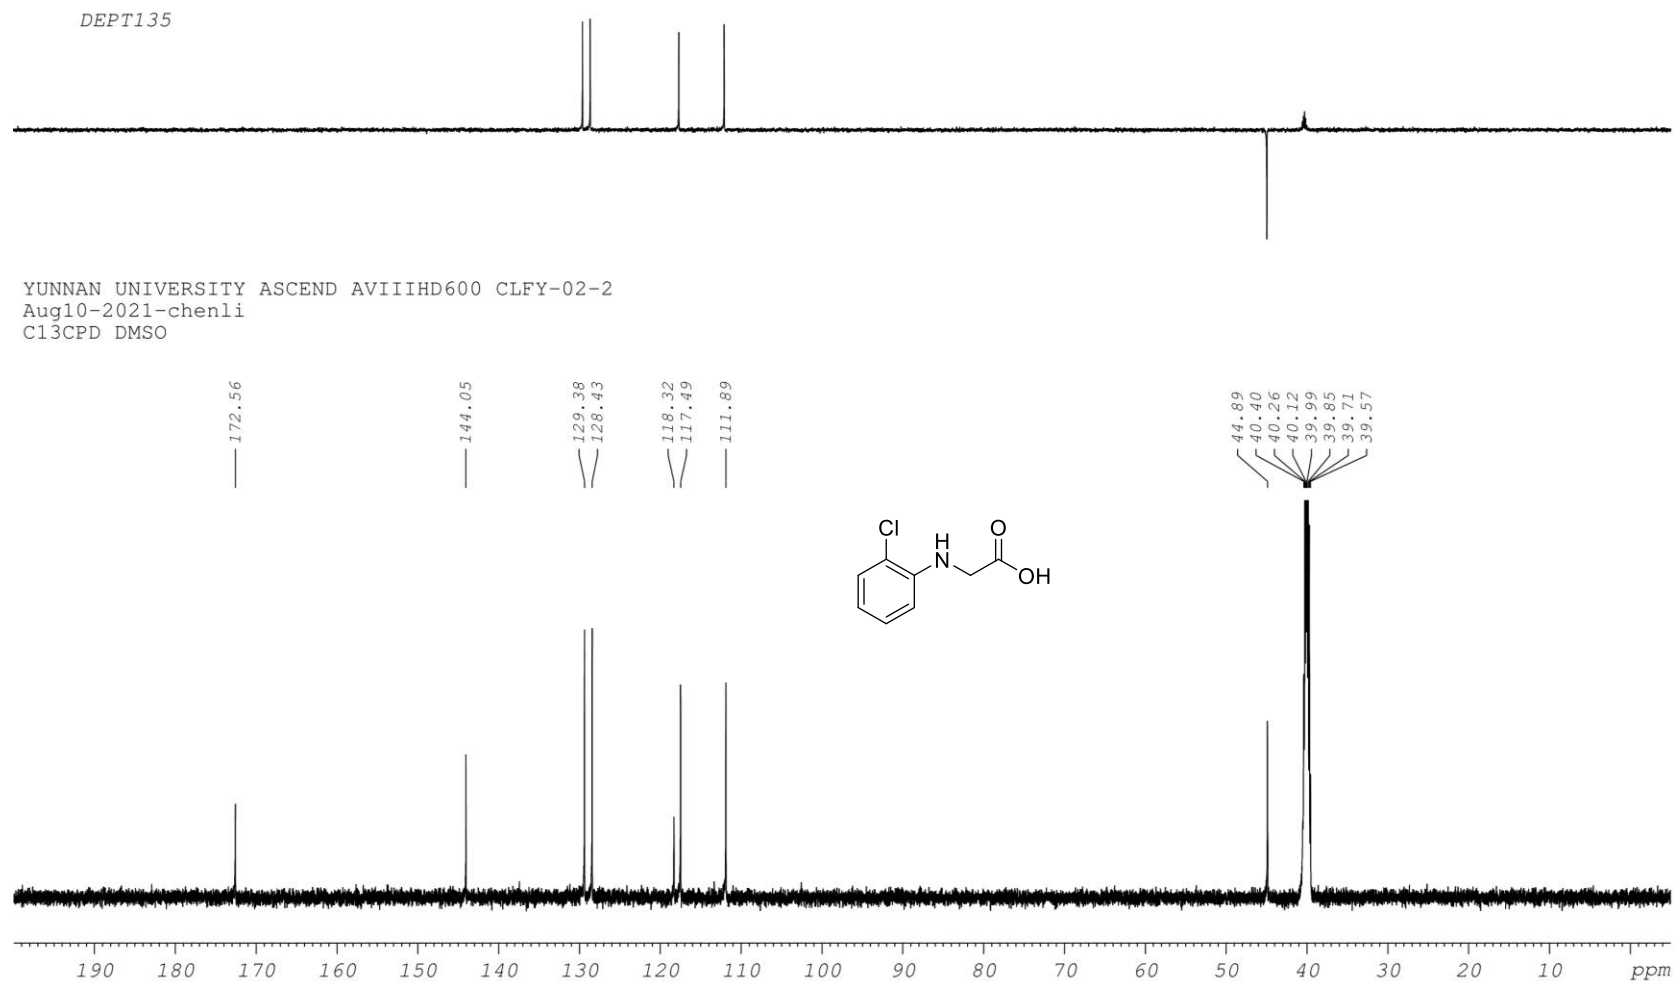

Figure S11.  $^{13}\text{C}$  NMR (150 MHz,  $\text{DMSO-}d_6$ ) spectra of compound **2d**

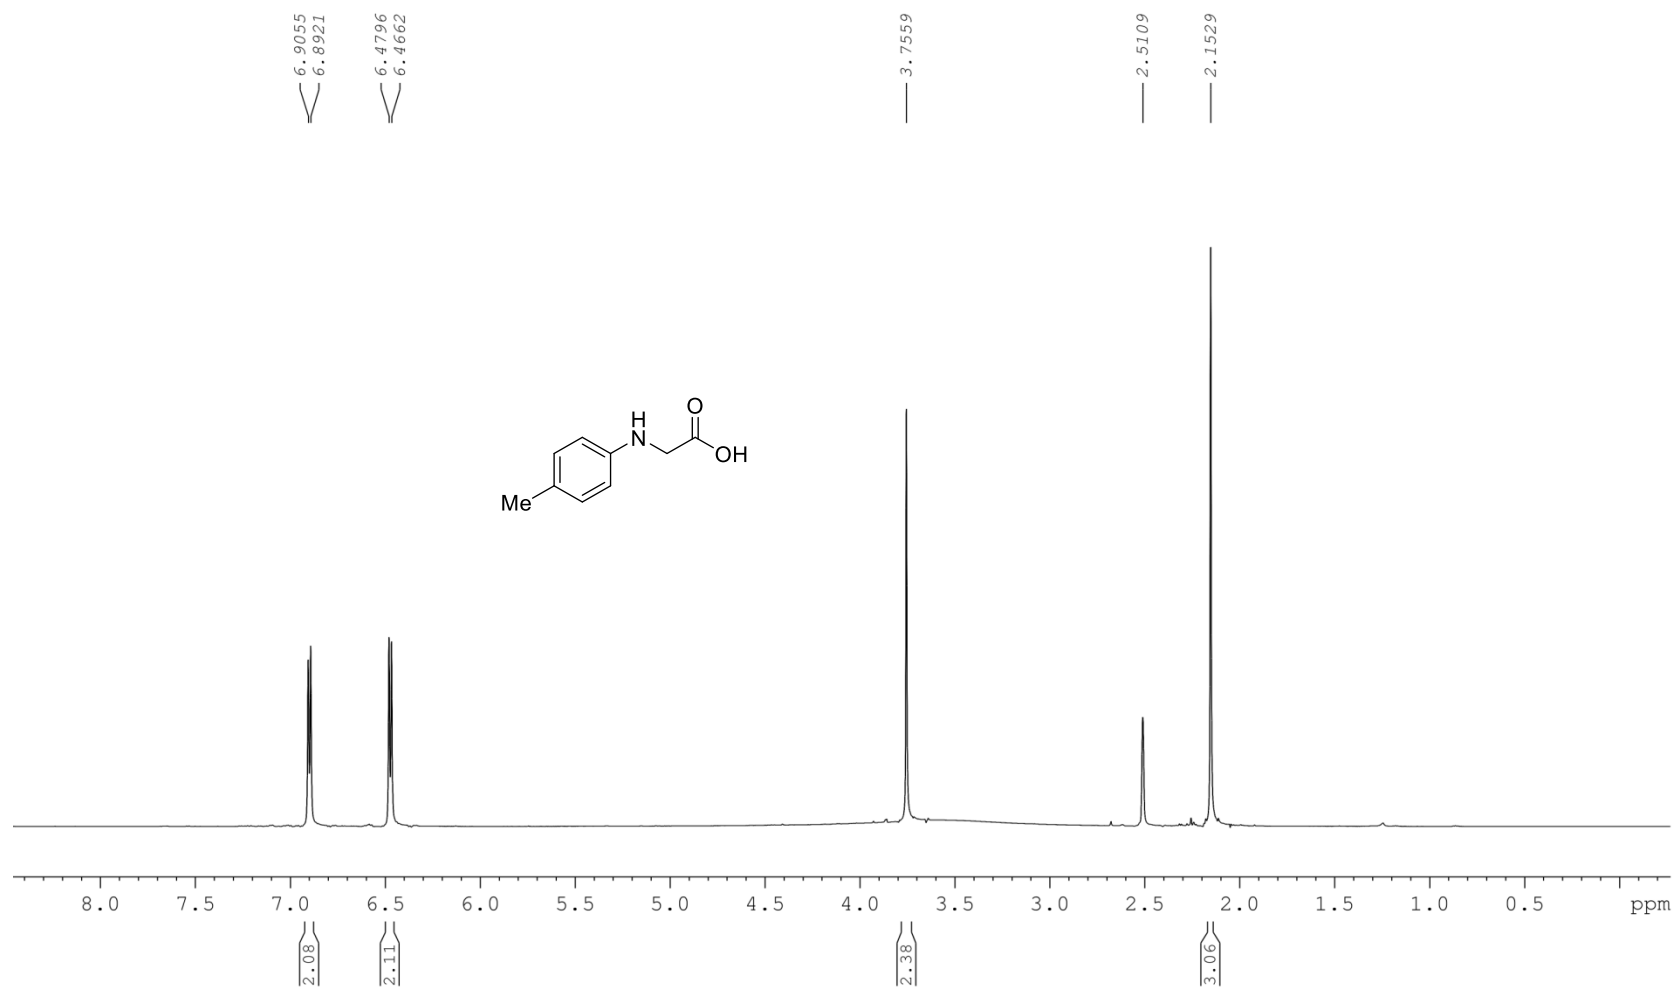

**Figure S12.**  $^1\text{H}$  NMR (600 MHz,  $\text{DMSO-}d_6$ ) spectra of compound **2f**

DEPT135

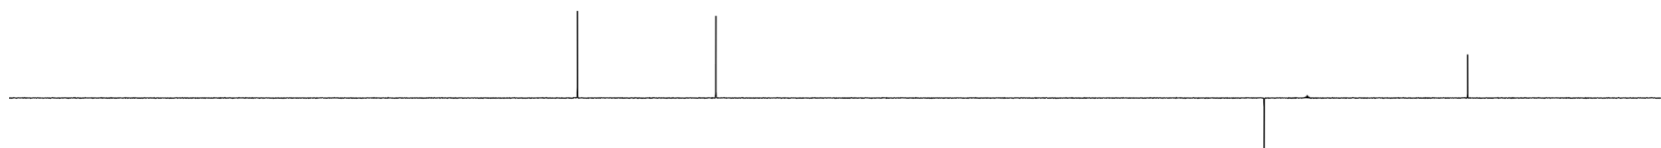

YUNNAN UNIVERSITY ASCEND AVIIIHD600 CLFY-05-2  
Aug16-2021-chenli  
C13CPD DMSO

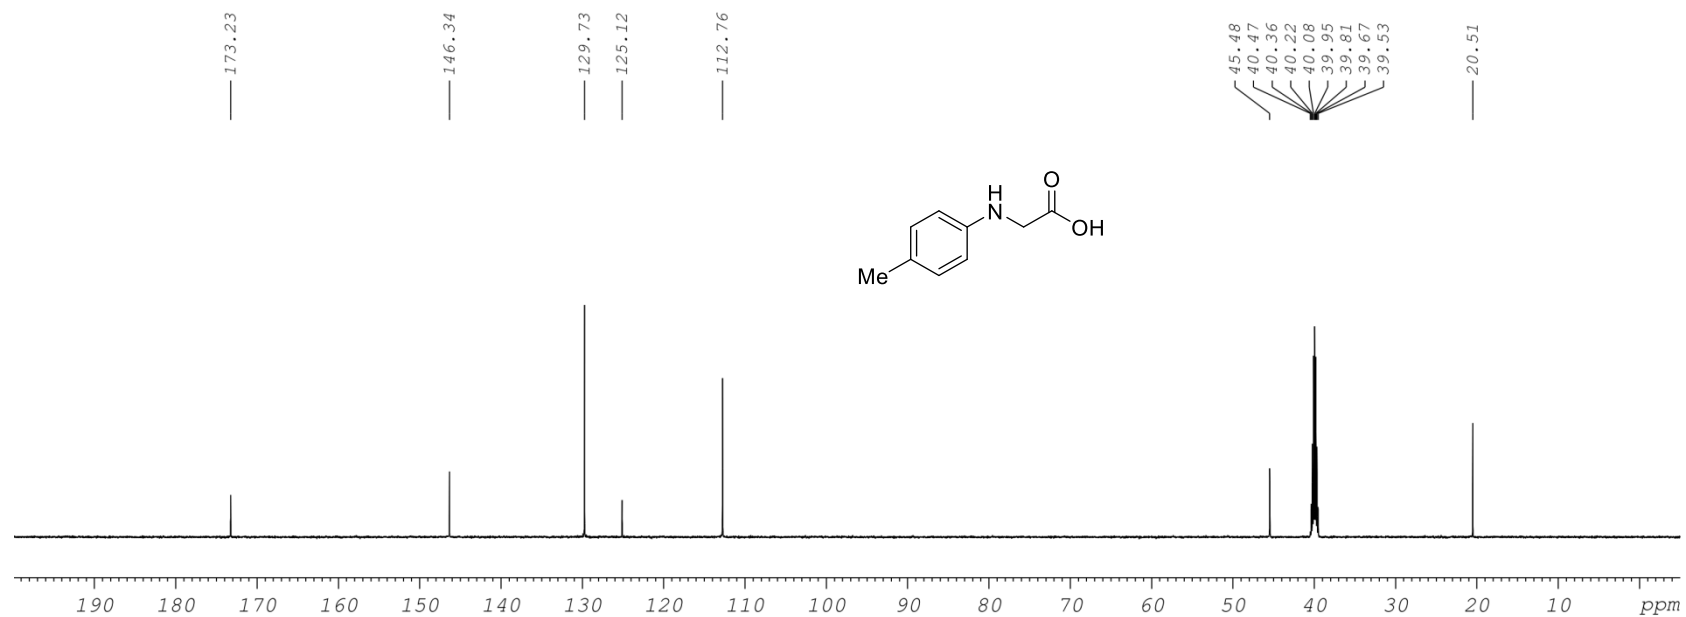

Figure S13.  $^{13}\text{C}$  NMR (150 MHz,  $\text{DMSO-}d_6$ ) spectra of compound **2f**

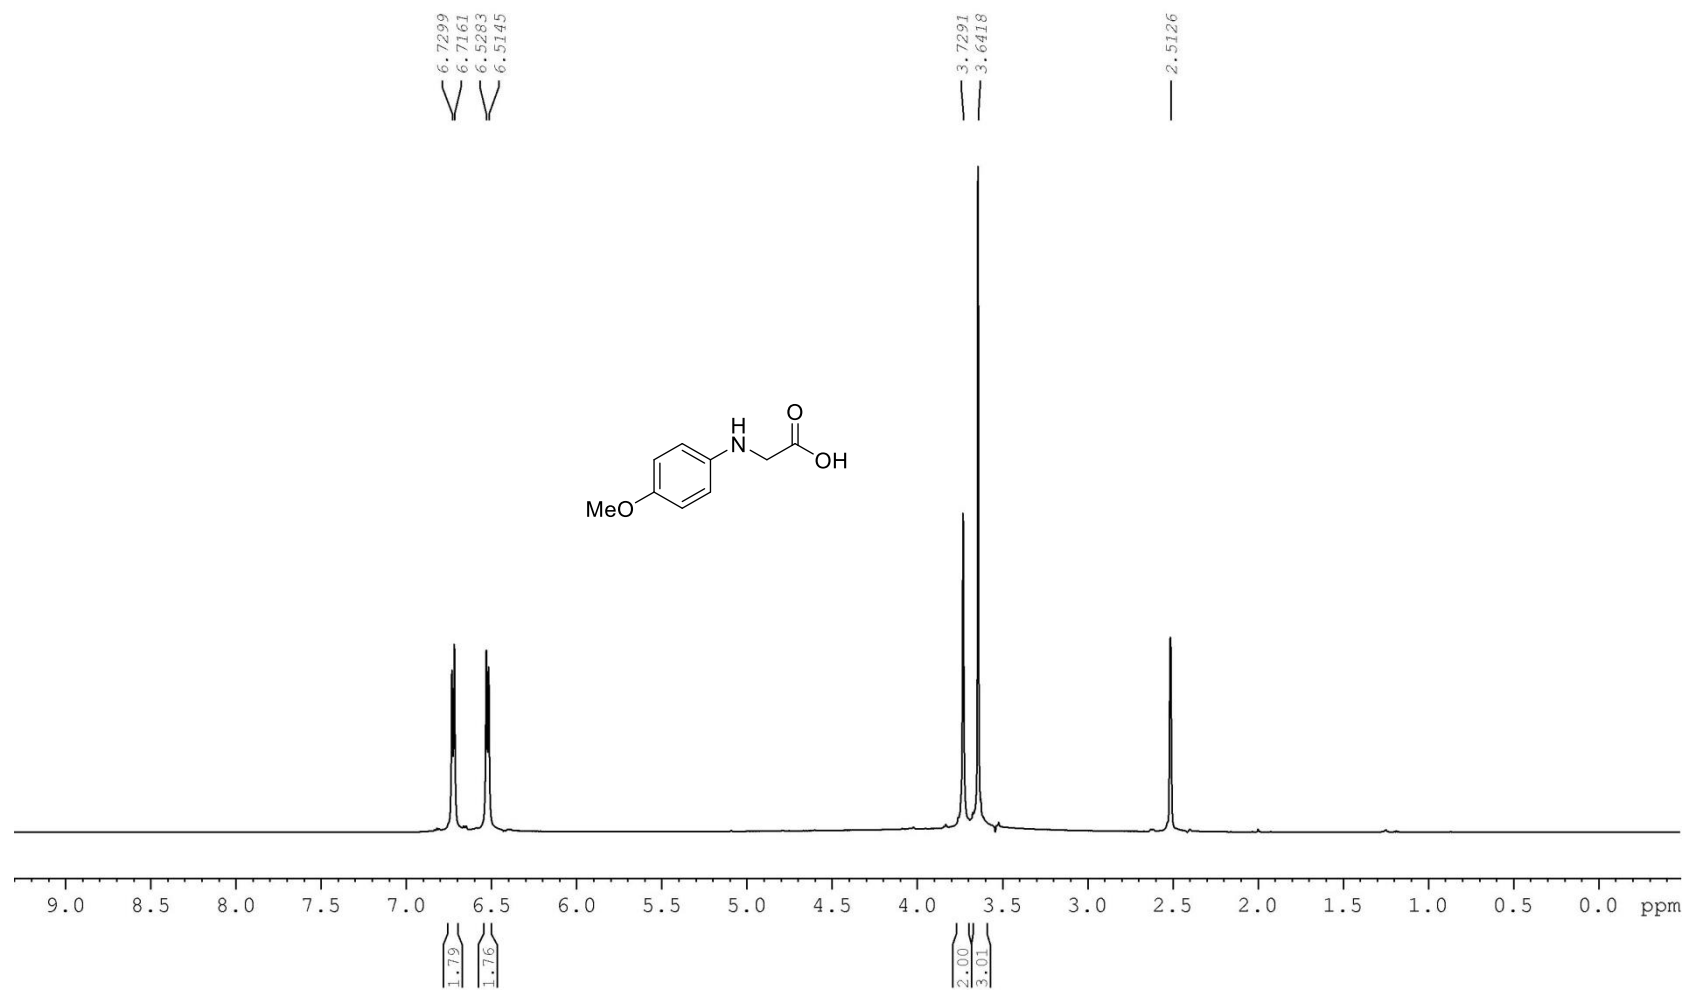

**Figure S14.** <sup>1</sup>H NMR (600 MHz, DMSO-*d*<sub>6</sub>) spectra of compound **2g**

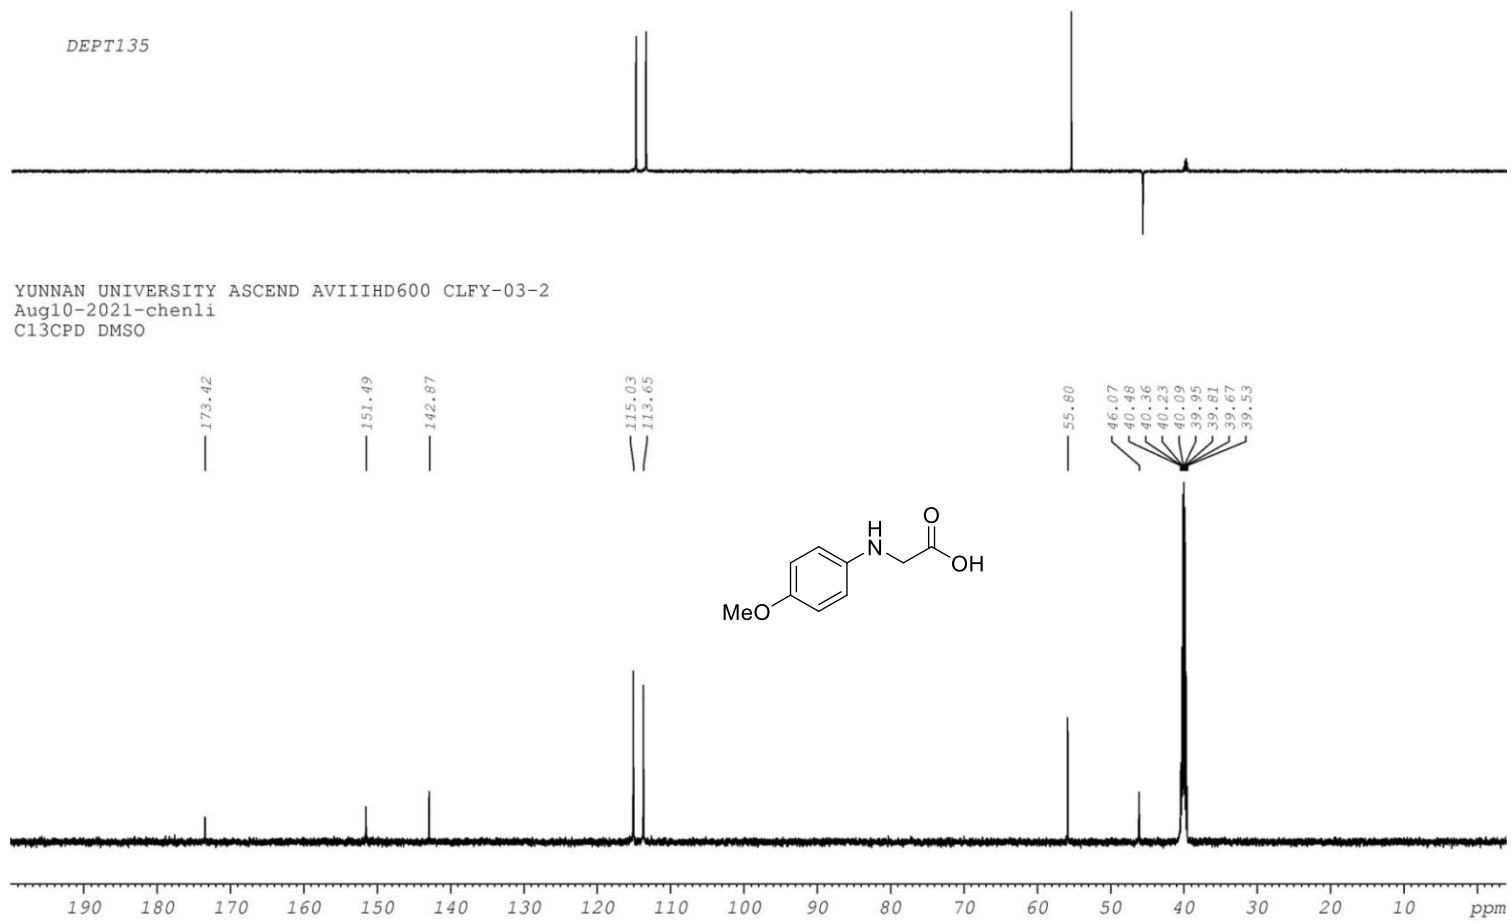

**Figure S15.**  $^{13}\text{C}$  NMR (150 MHz,  $\text{DMSO-}d_6$ ) spectra of compound **2g**



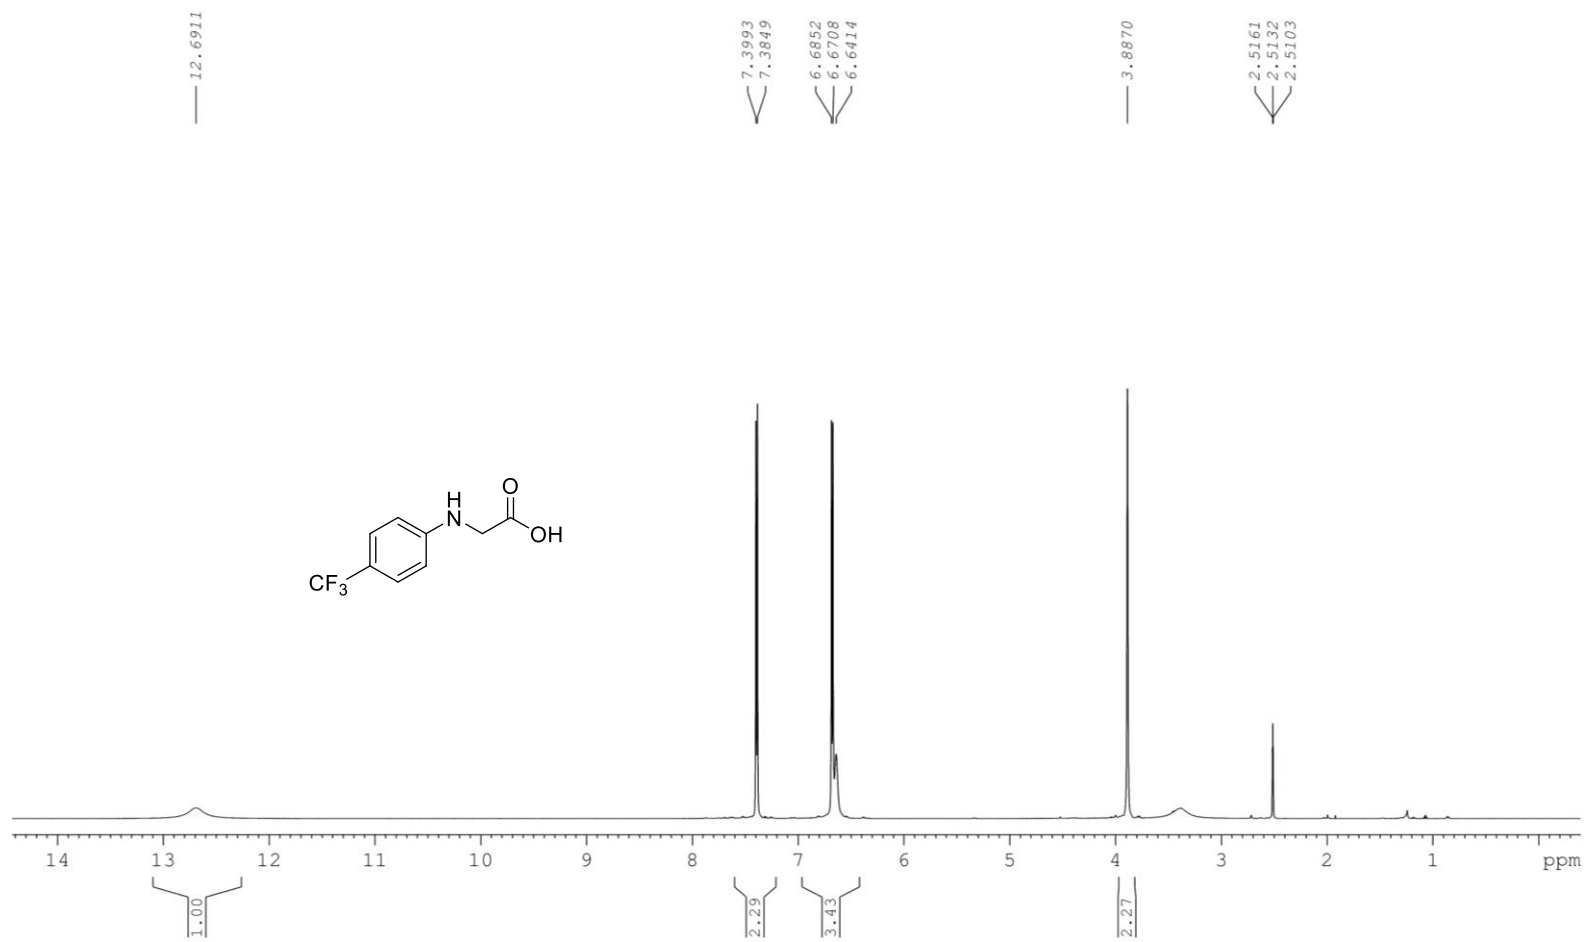

**Figure S16.** <sup>1</sup>H NMR (600 MHz, DMSO-*d*<sub>6</sub>) spectra of compound **2h**

DEPT135

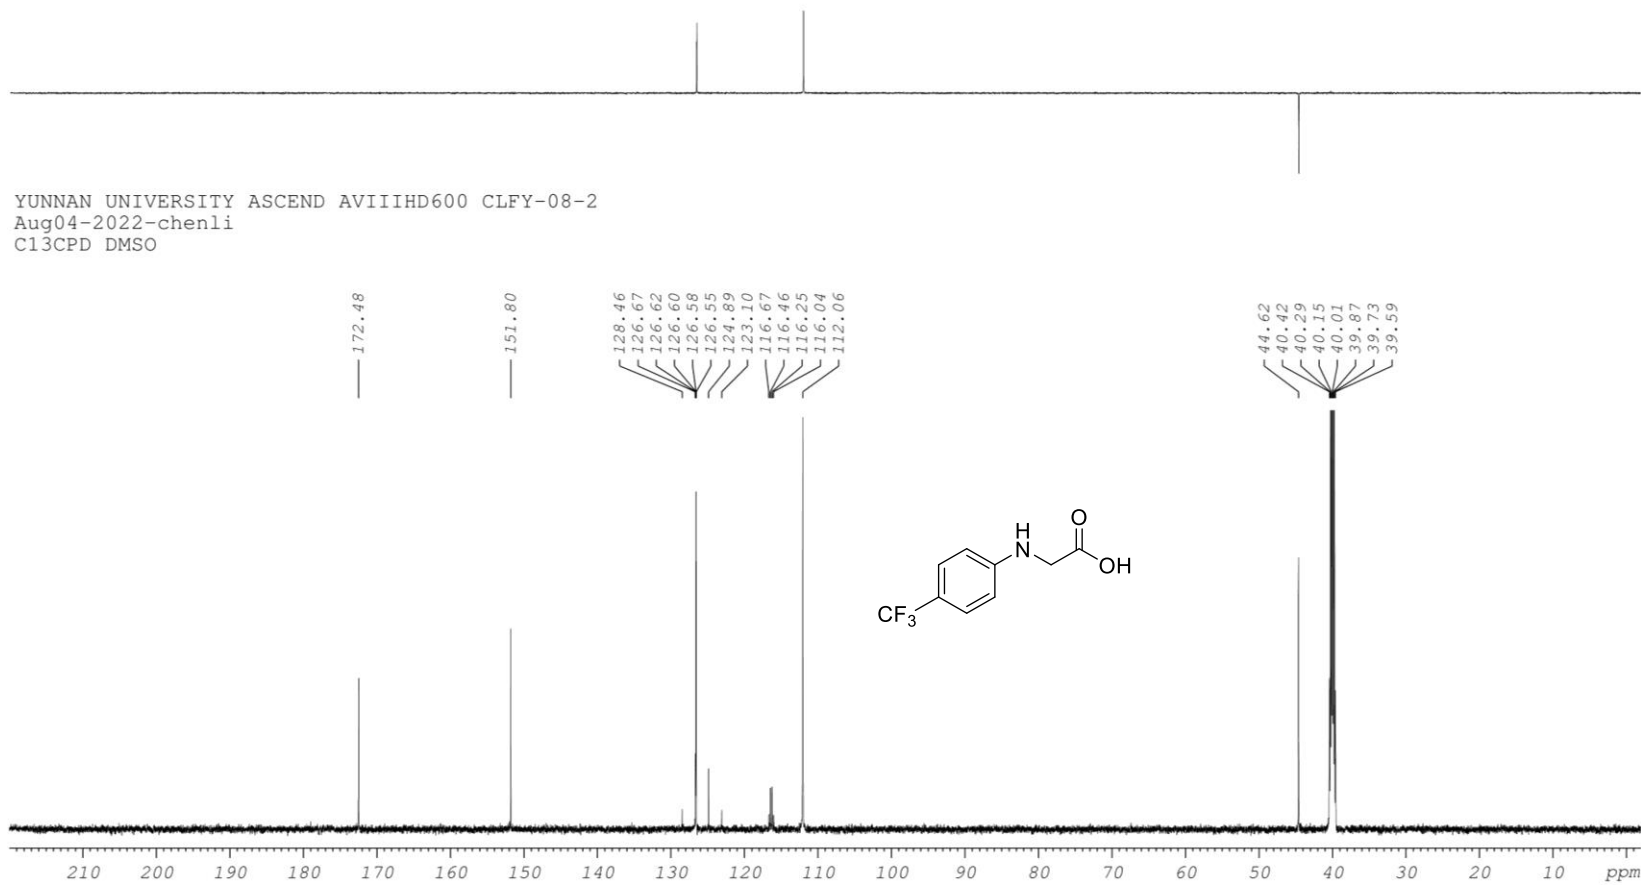

Figure S17.  $^{13}\text{C}$  NMR (150 MHz,  $\text{DMSO-}d_6$ ) spectra of compound **2h**

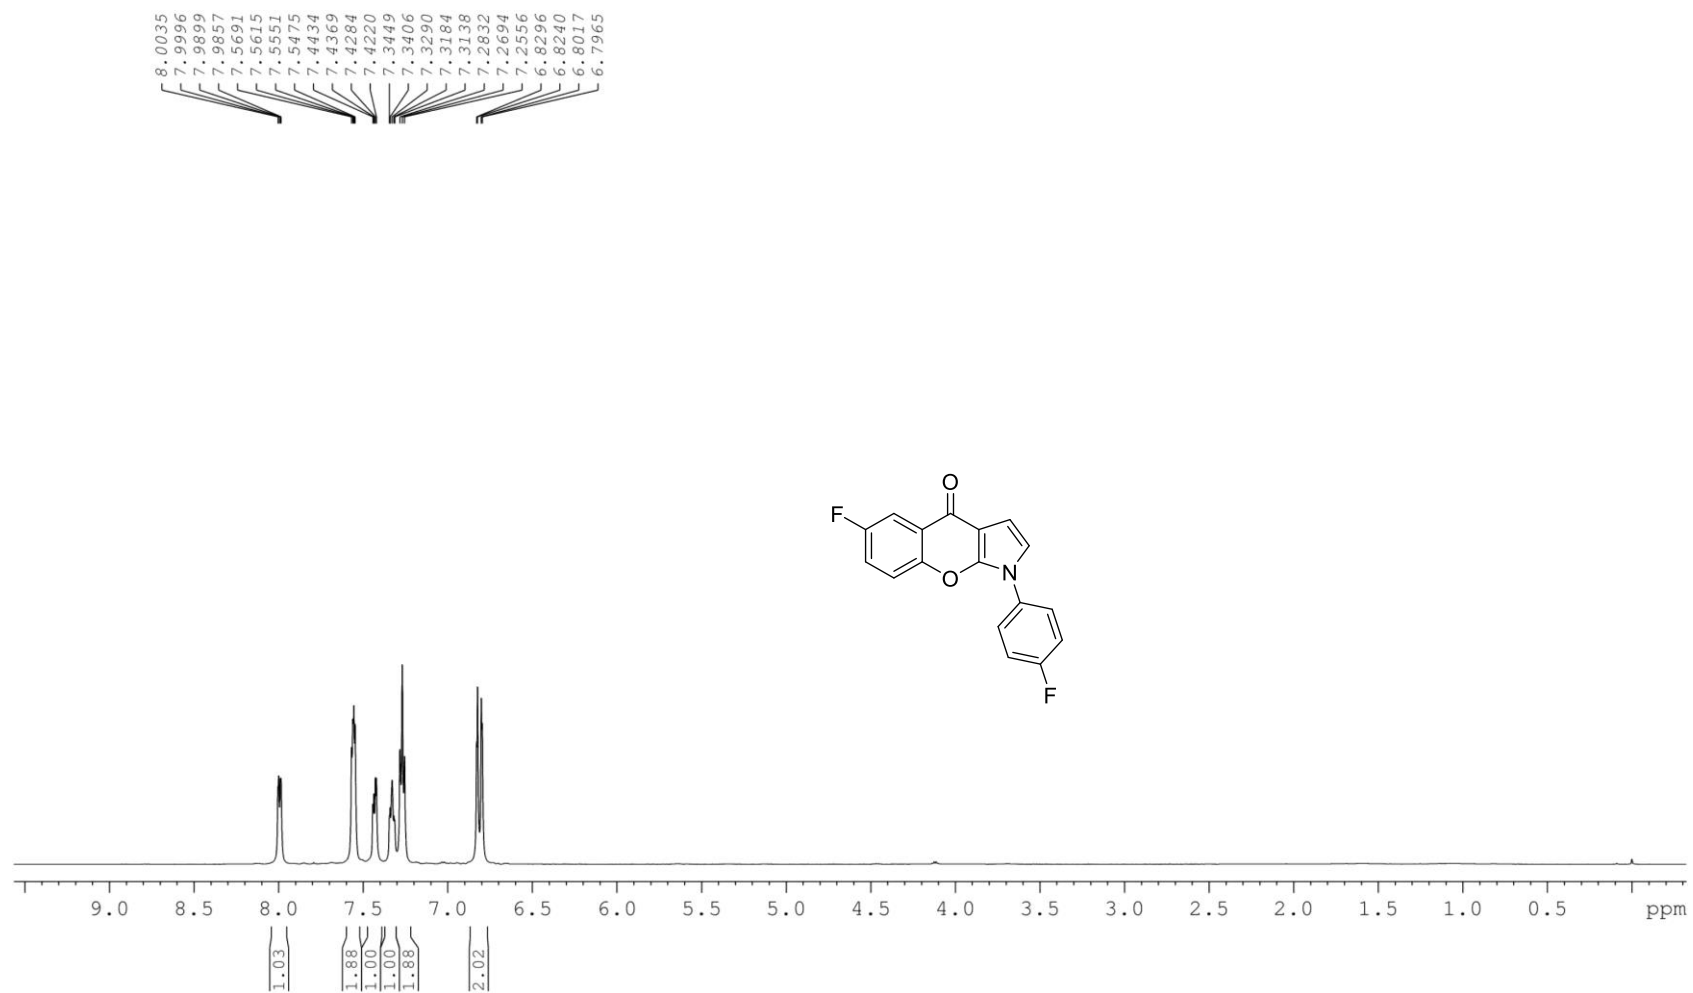

Figure S18.  $^1\text{H}$  NMR (600 MHz,  $\text{CDCl}_3$ ) spectra of compound 3a

DEPT135

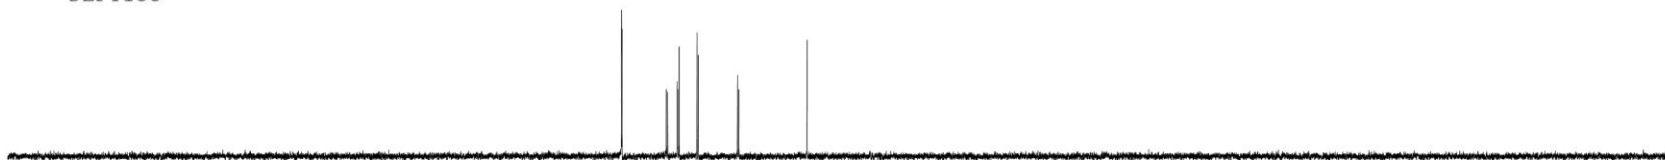

YUNNAN UNIVERSITY ASCEND AVIIIHD600 CLF-23-2  
Jul28-2022-chenli  
C13CPD CDCl3

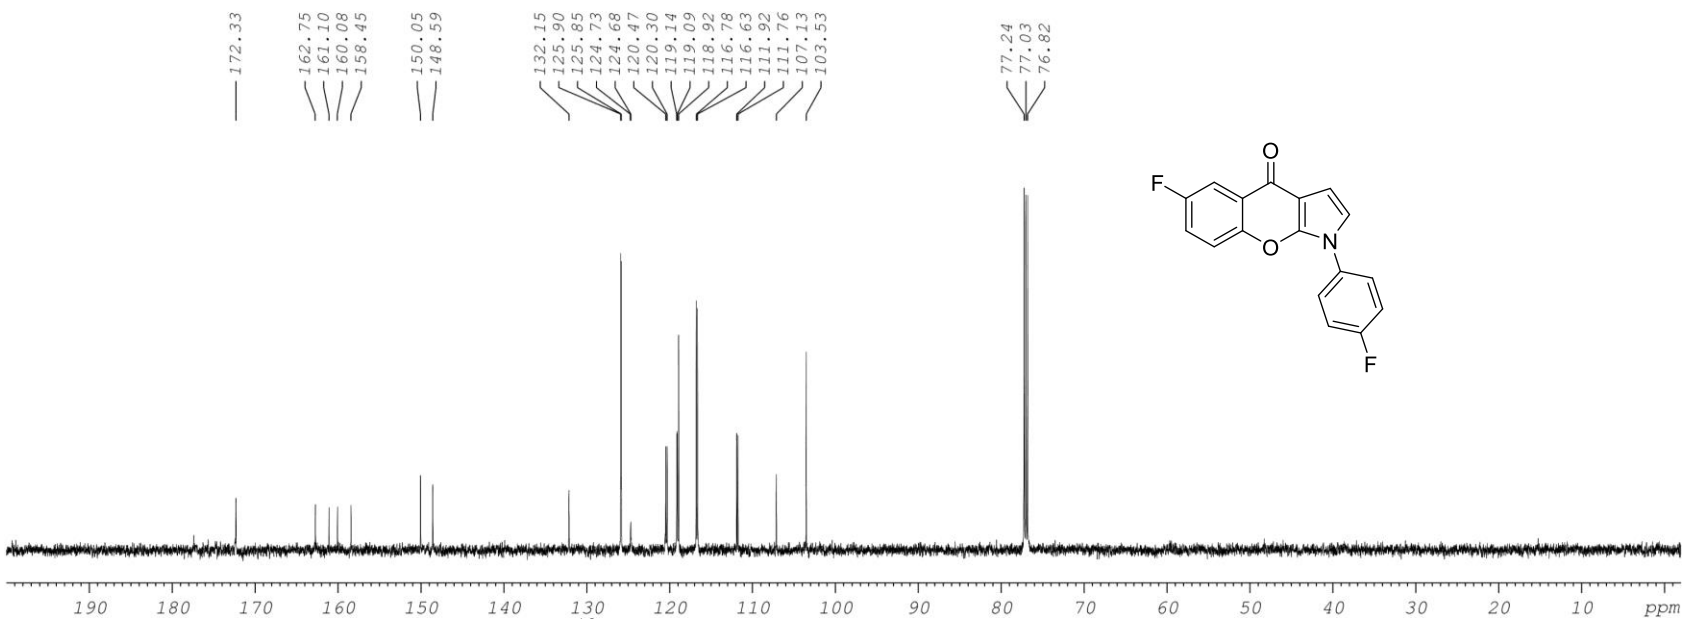

Figure S19.  $^{13}\text{C}$  NMR (150 MHz,  $\text{CDCl}_3$ ) spectra of compound 3a

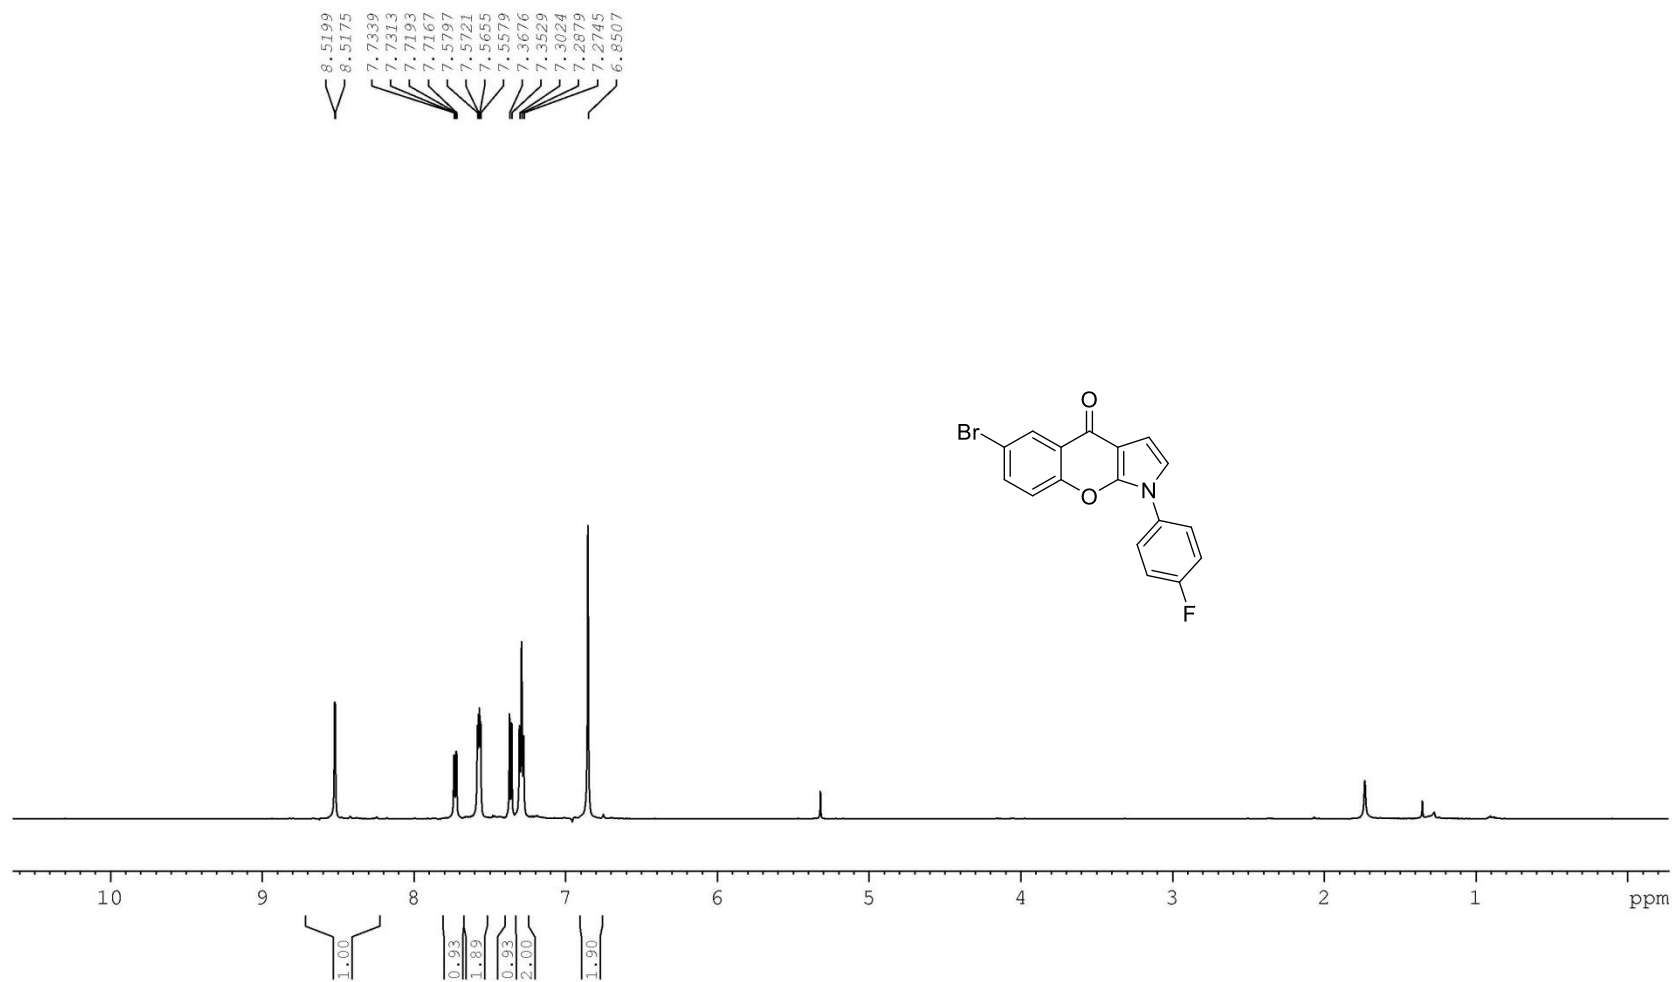

**Figure S20.** <sup>1</sup>H NMR (600 MHz, CDCl<sub>3</sub>) spectra of compound **3b**

DEPT135

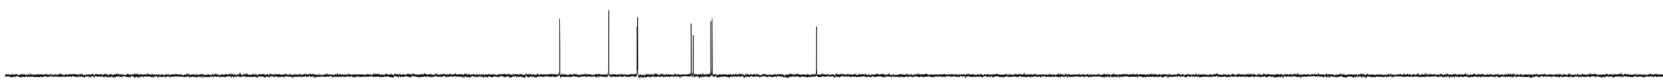

YUNNAN UNIVERSITY ASCEND AVIIIHD600 CLF-24-2  
Aug19-2021-chenli  
C13CPD CDCl3

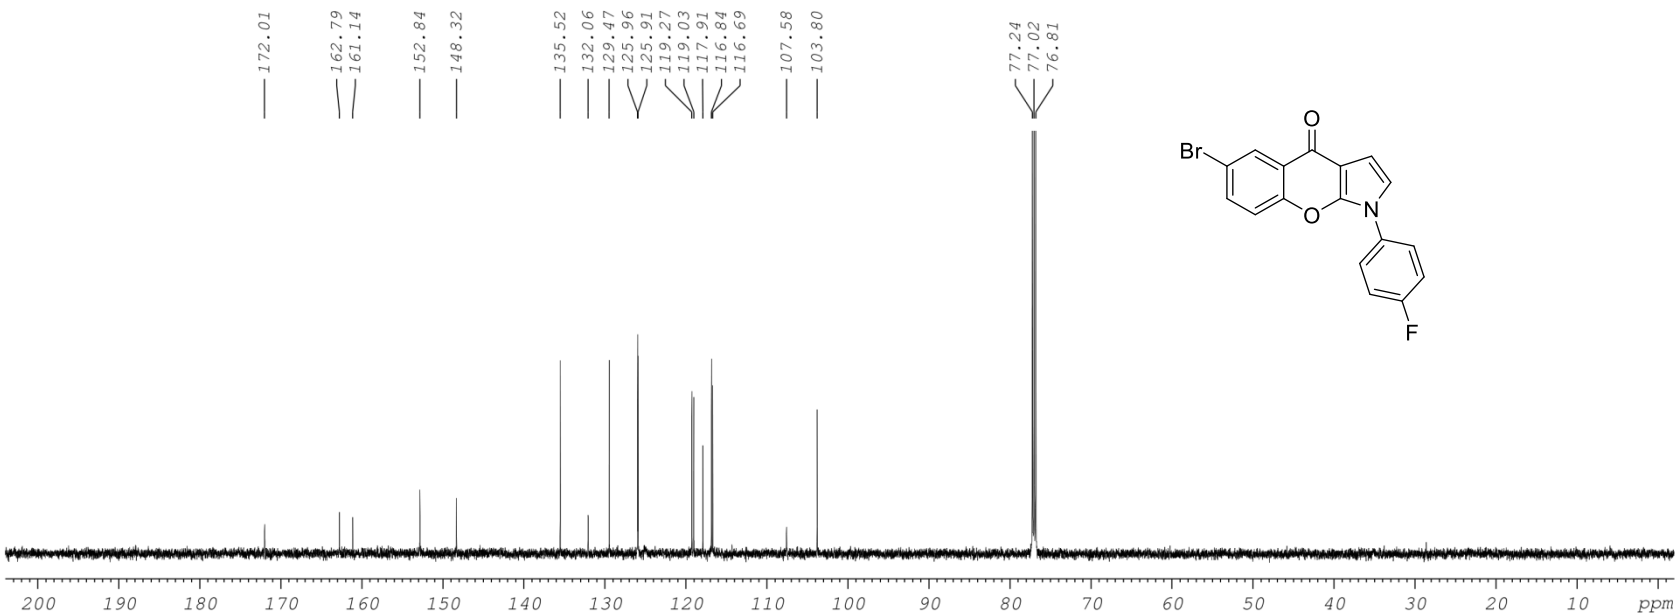

Figure S21.  $^{13}\text{C}$  NMR (150 MHz,  $\text{CDCl}_3$ ) spectra of compound **3b**

F19CPD CDC13

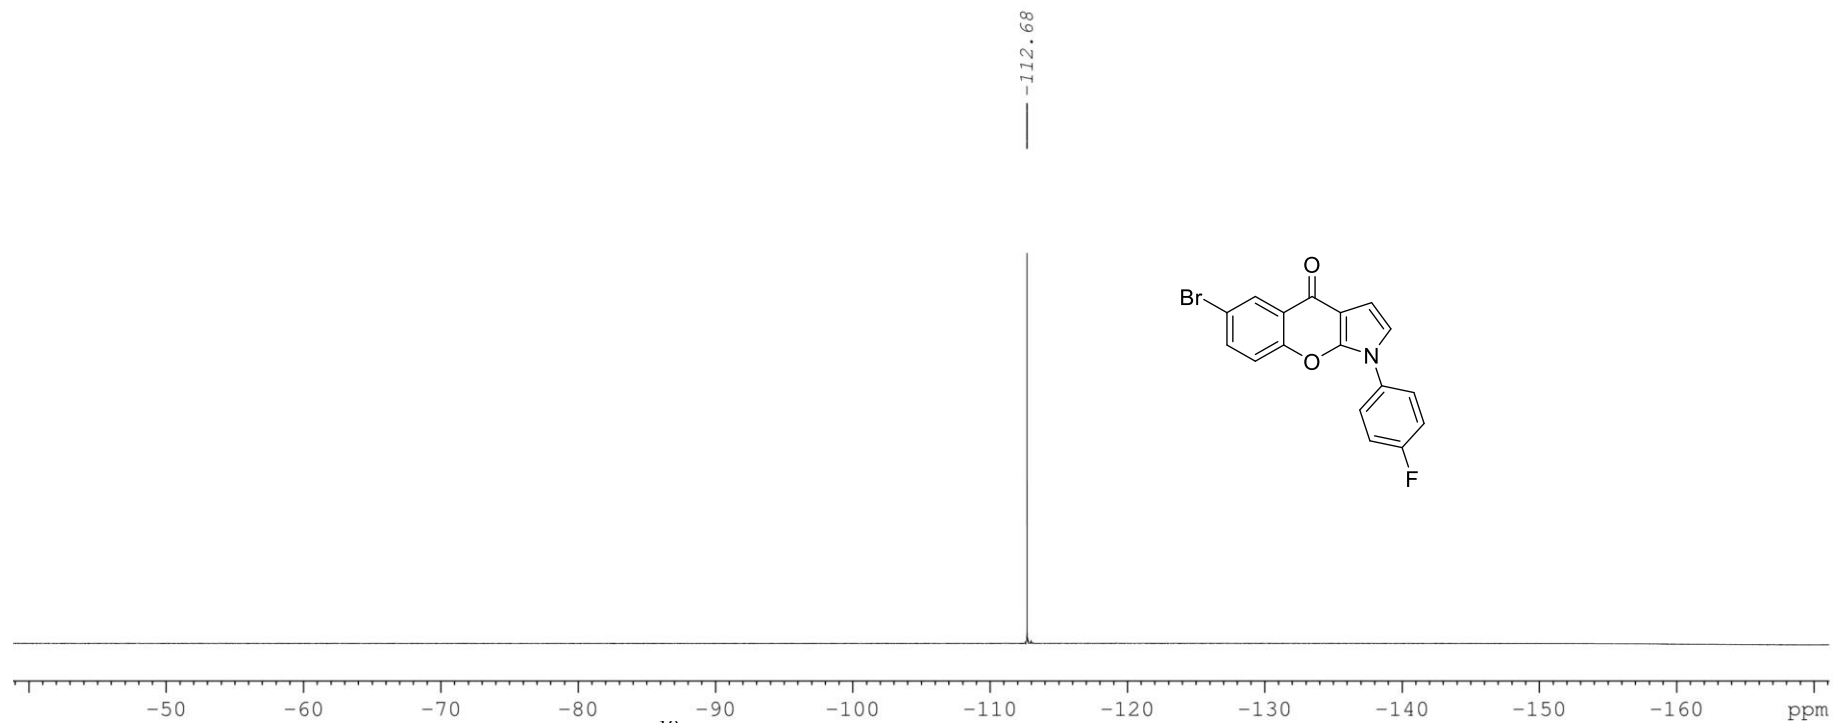

**Figure S22.**  $^{19}\text{F}$  NMR (564 MHz,  $\text{CDCl}_3$ ) spectra of compound **3b**

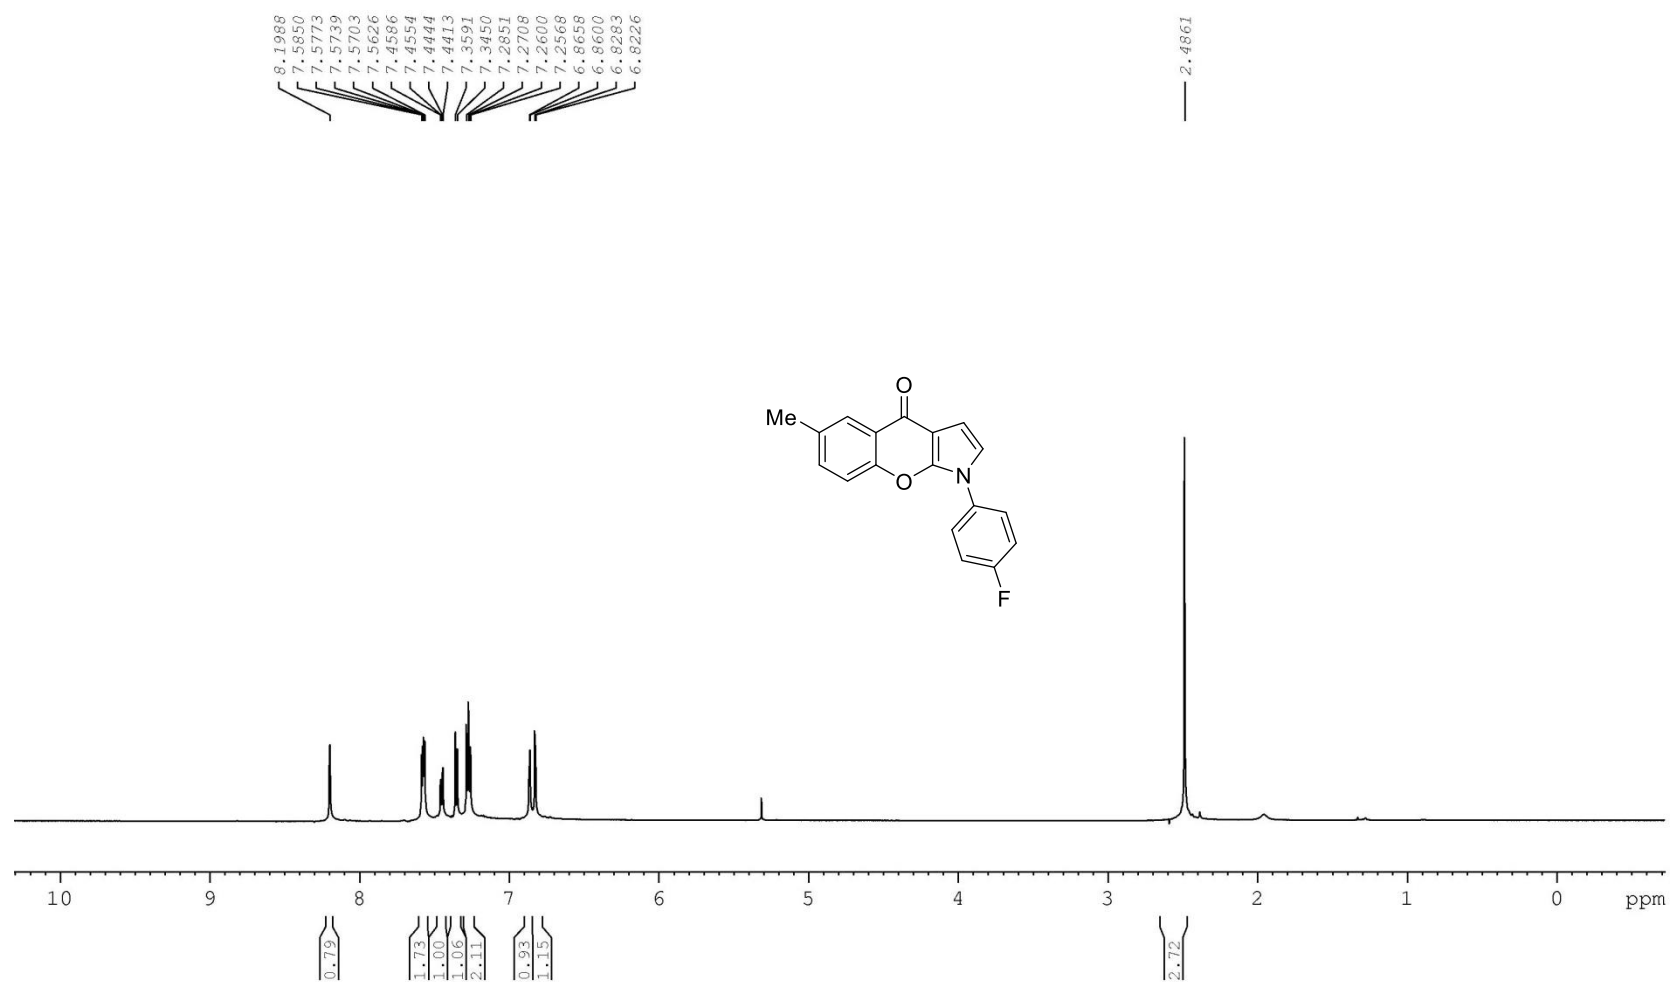

**Figure S23.** <sup>1</sup>H NMR (600 MHz, CDCl<sub>3</sub>) spectra of compound **3c**



DEPT135

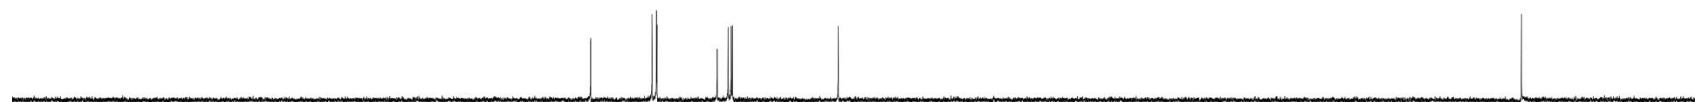

YUNNAN UNIVERSITY ASCEND AVIIIHD600 CLF-26-2  
Aug19-2021-chenli  
C13CPD CDC13

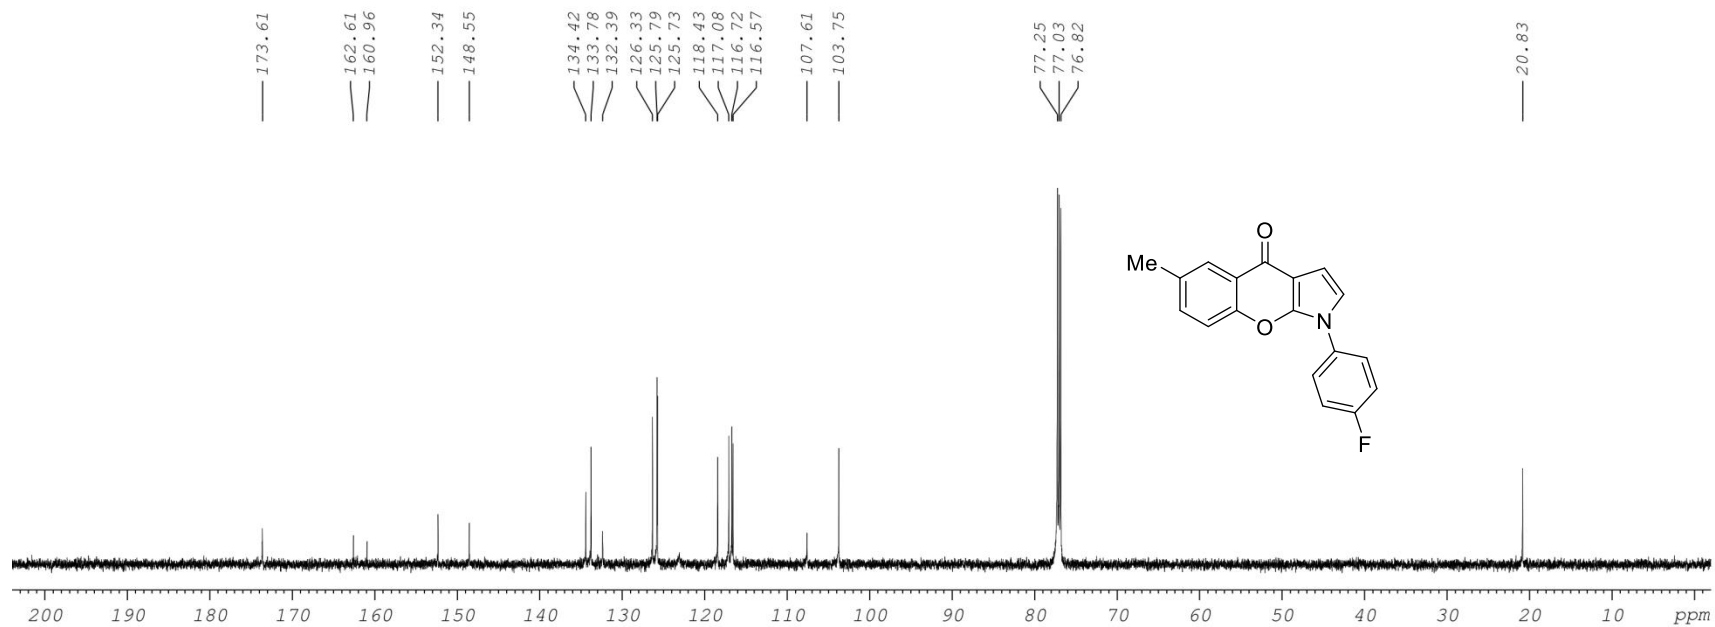

Figure S24.  $^{13}\text{C}$  NMR (150 MHz,  $\text{CDCl}_3$ ) spectra of compound 3c

YUNNAN UNIVERSITY ASCEND AVIIIHD600 CLF-26-2  
Aug19-2021-chenli  
F19CPD CDCl3

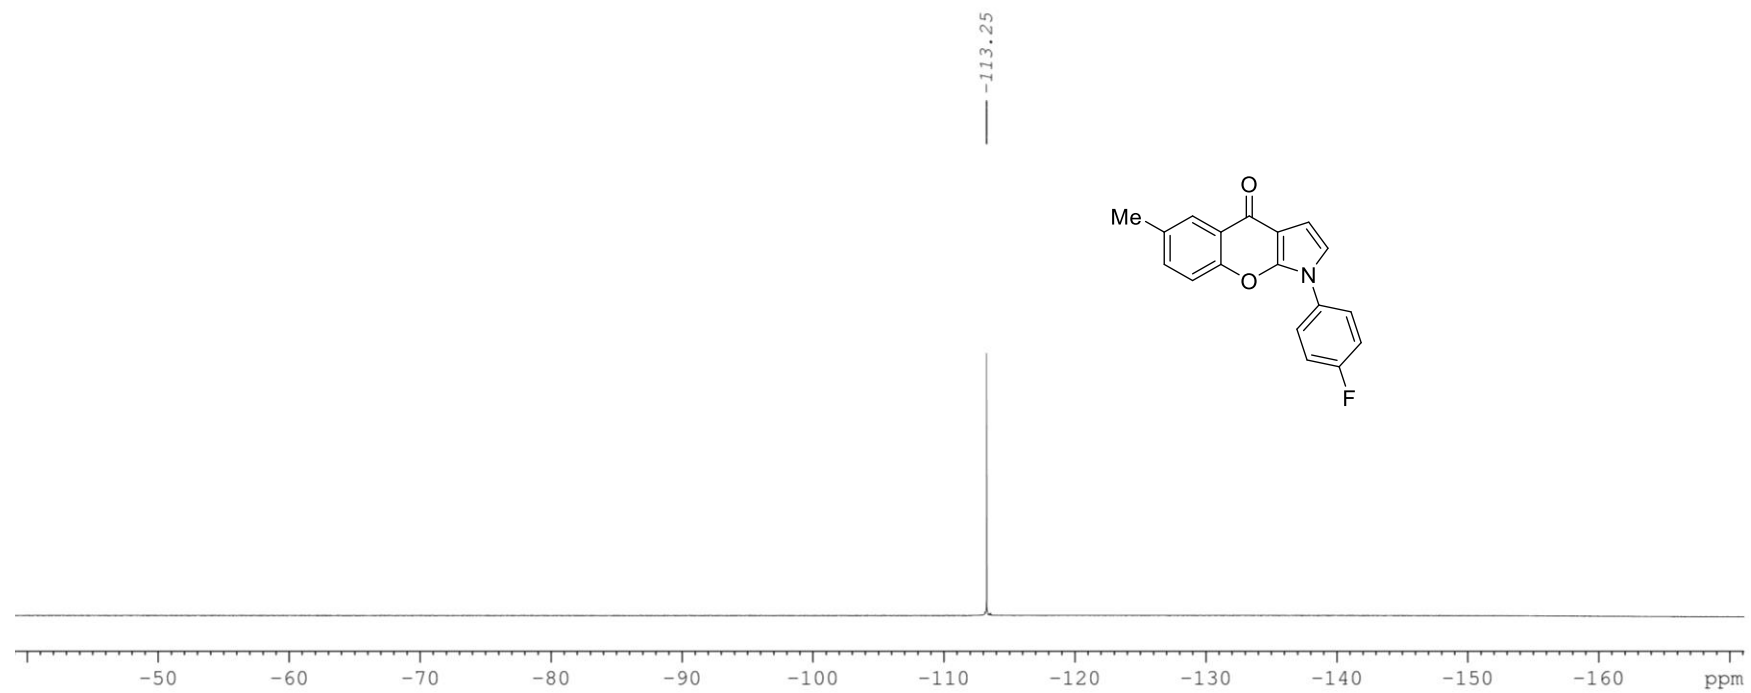

**Figure S25.**  $^{19}\text{F}$  NMR (564 MHz,  $\text{CDCl}_3$ ) spectra of compound **3c**

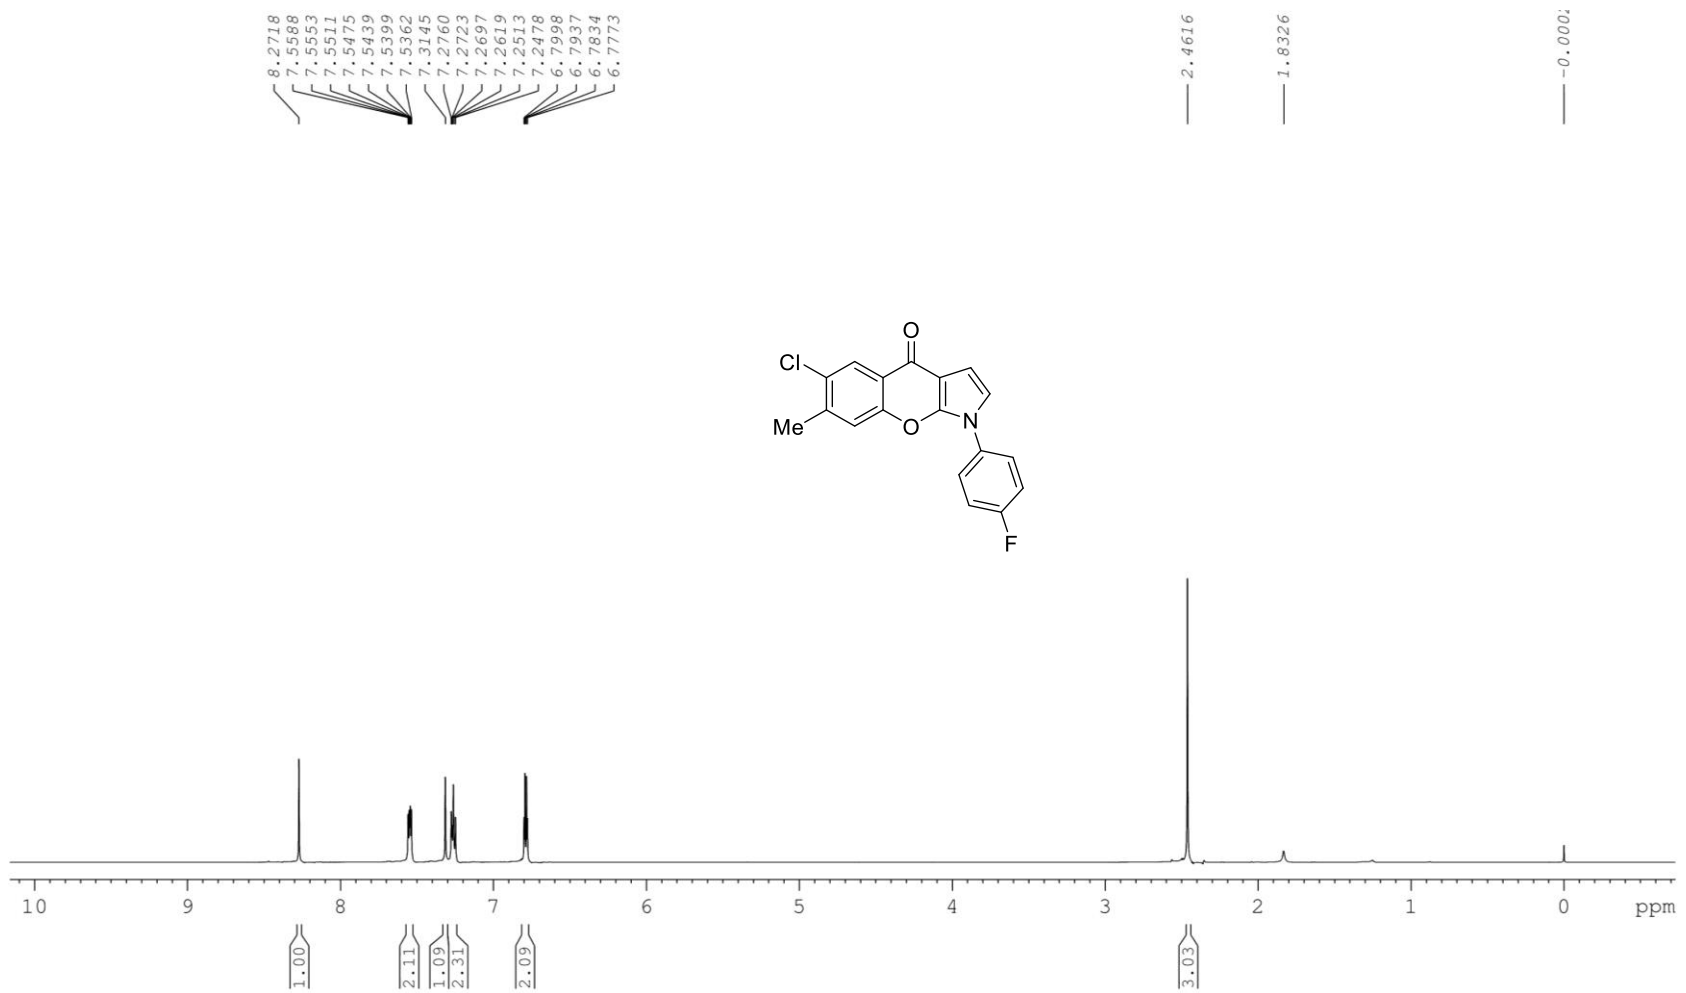

Figure S26. <sup>1</sup>H NMR (600 MHz, CDCl<sub>3</sub>) spectra of compound 3d

DEPT135

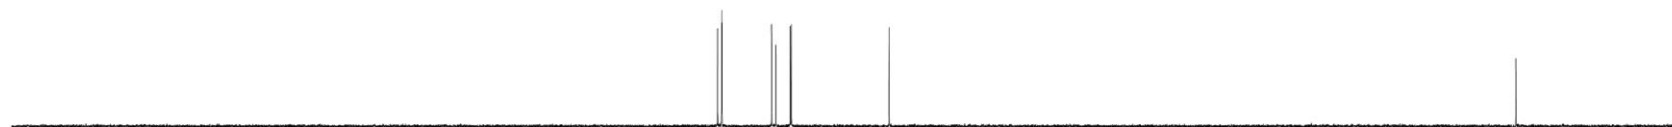

YUNNAN UNIVERSITY ASCEND AVIIIHD600 CLF-25-2  
Aug05-2022-chenli  
C13CPD CDC13

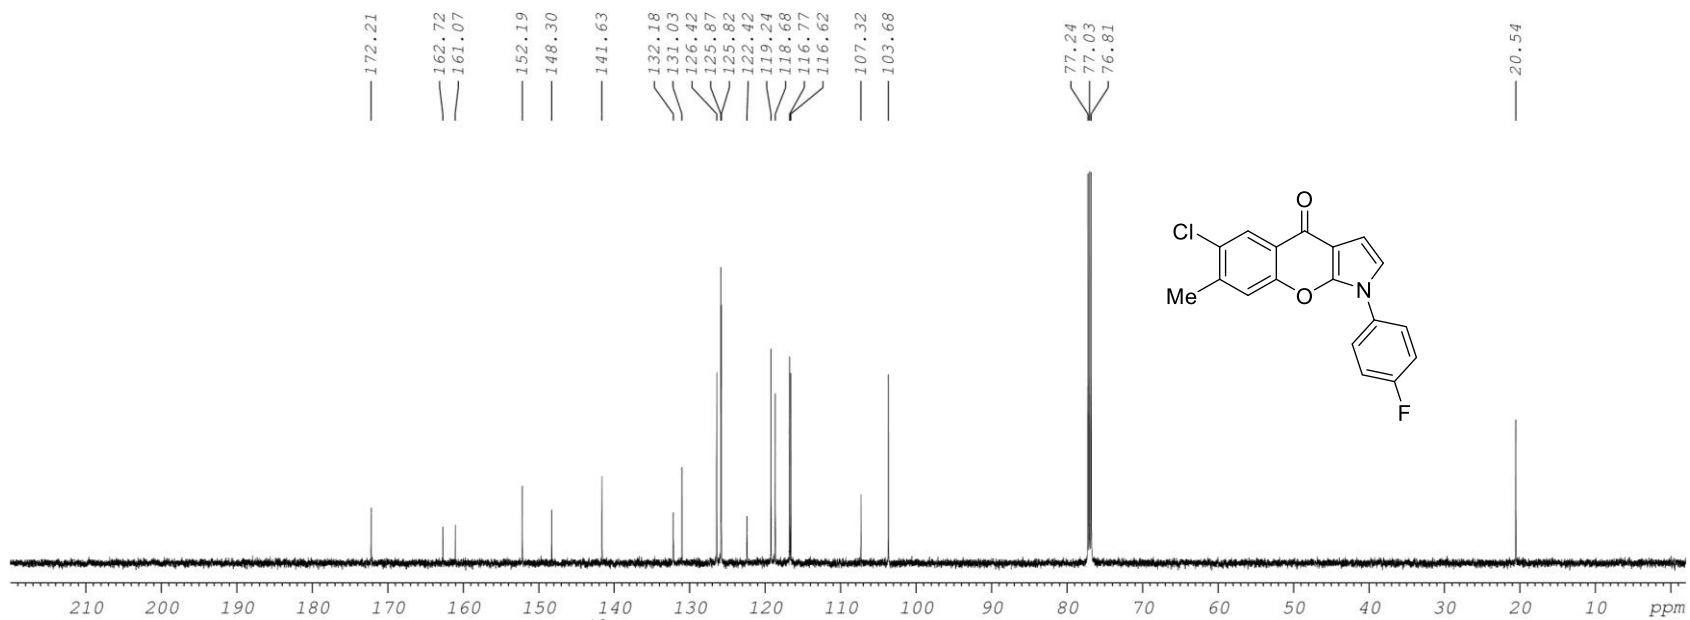

Figure S27.  $^{13}\text{C}$  NMR (150 MHz,  $\text{CDCl}_3$ ) spectra of compound 3d

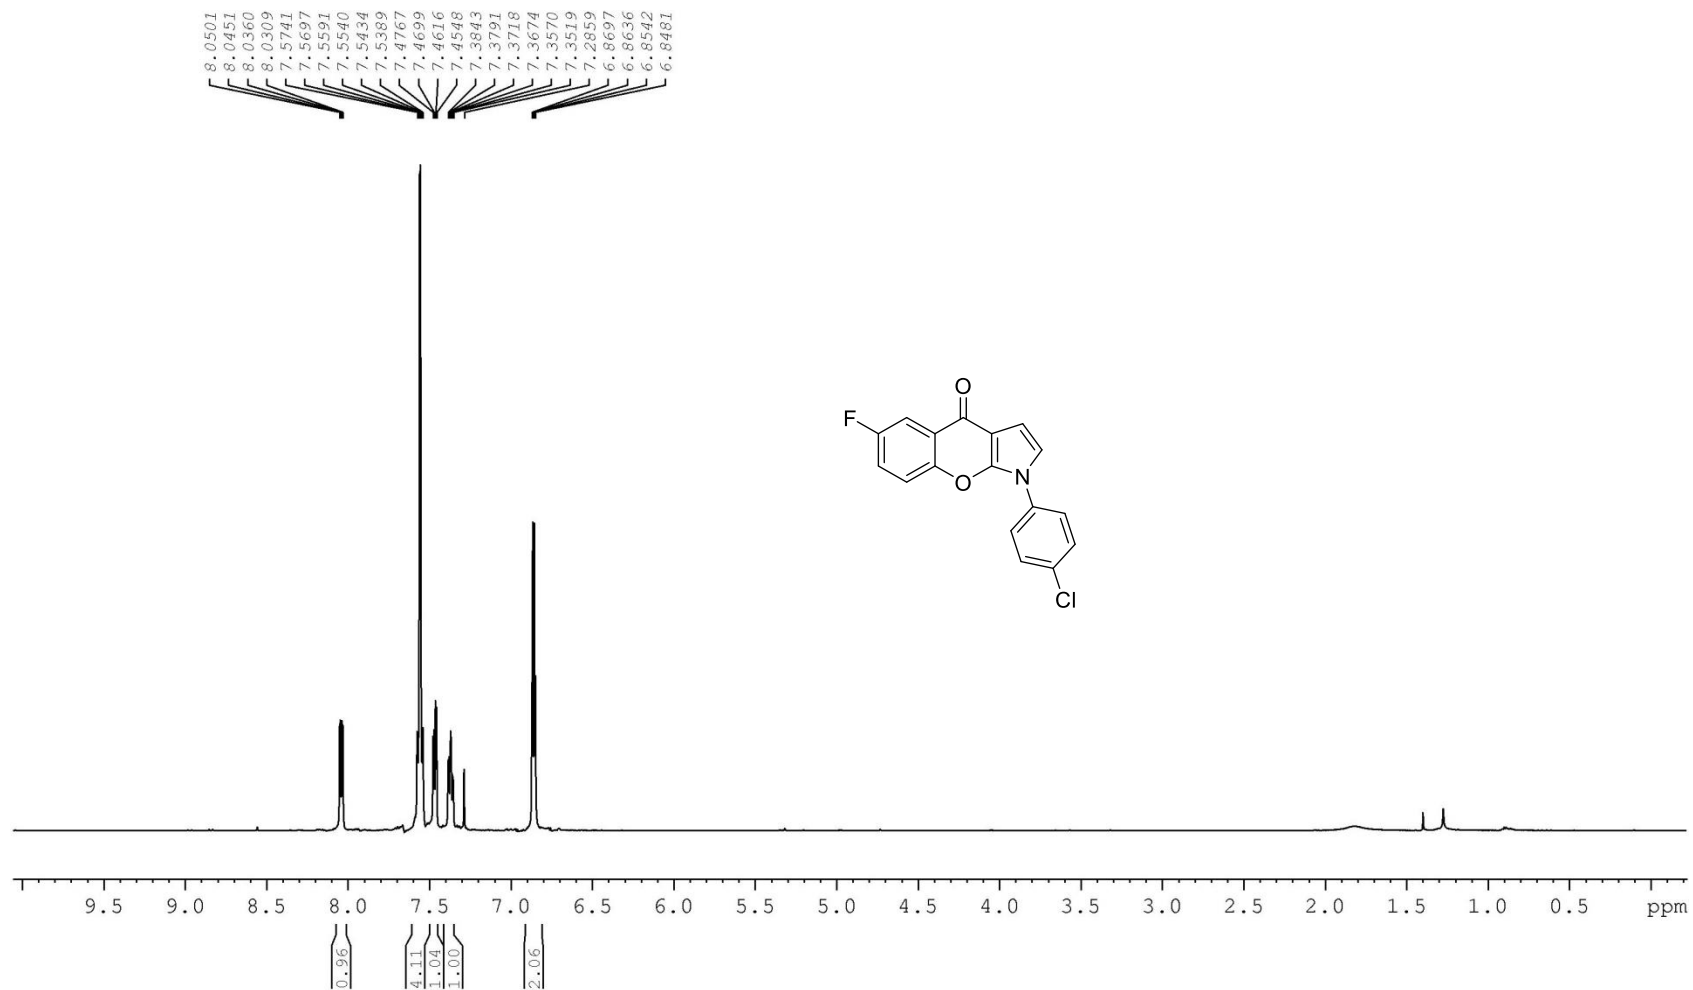

**Figure S28.**  $^1\text{H}$  NMR (600 MHz,  $\text{CDCl}_3$ ) spectra of compound **3e**

DEPT135

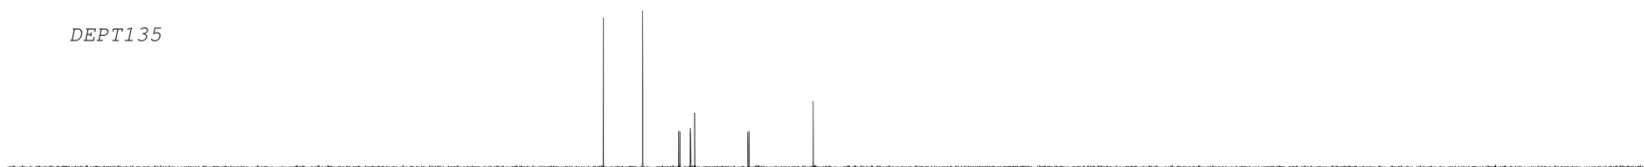

YUNNAN UNIVERSITY ASCEND AVIIIHD600 CLF-11  
Aug10-2021-chenli  
C13CPD CDC13

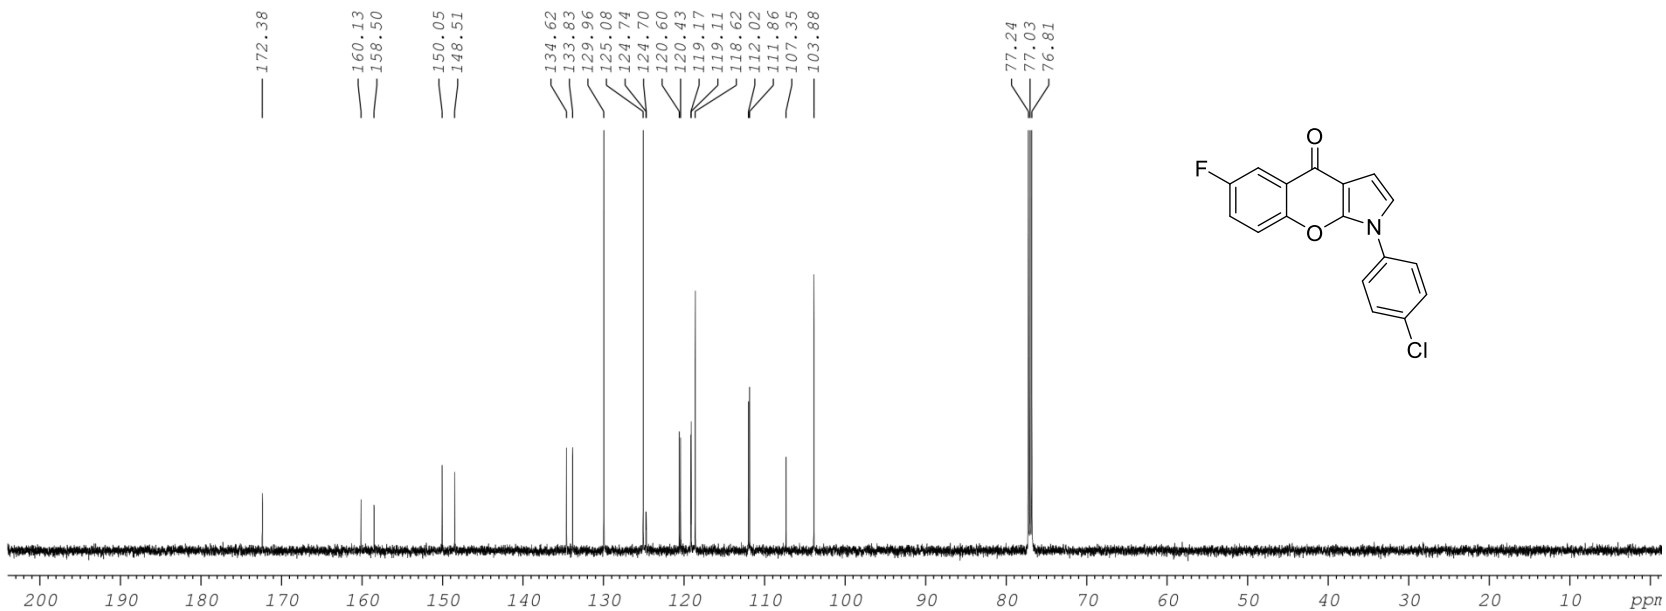

Figure S29.  $^{13}\text{C}$  NMR (150 MHz,  $\text{CDCl}_3$ ) spectra of compound **3e**

YUNNAN UNIVERSITY ASCEND AVIIIHD600 CLF-11  
Aug10-2021-chenli  
F19CPD CDCl3

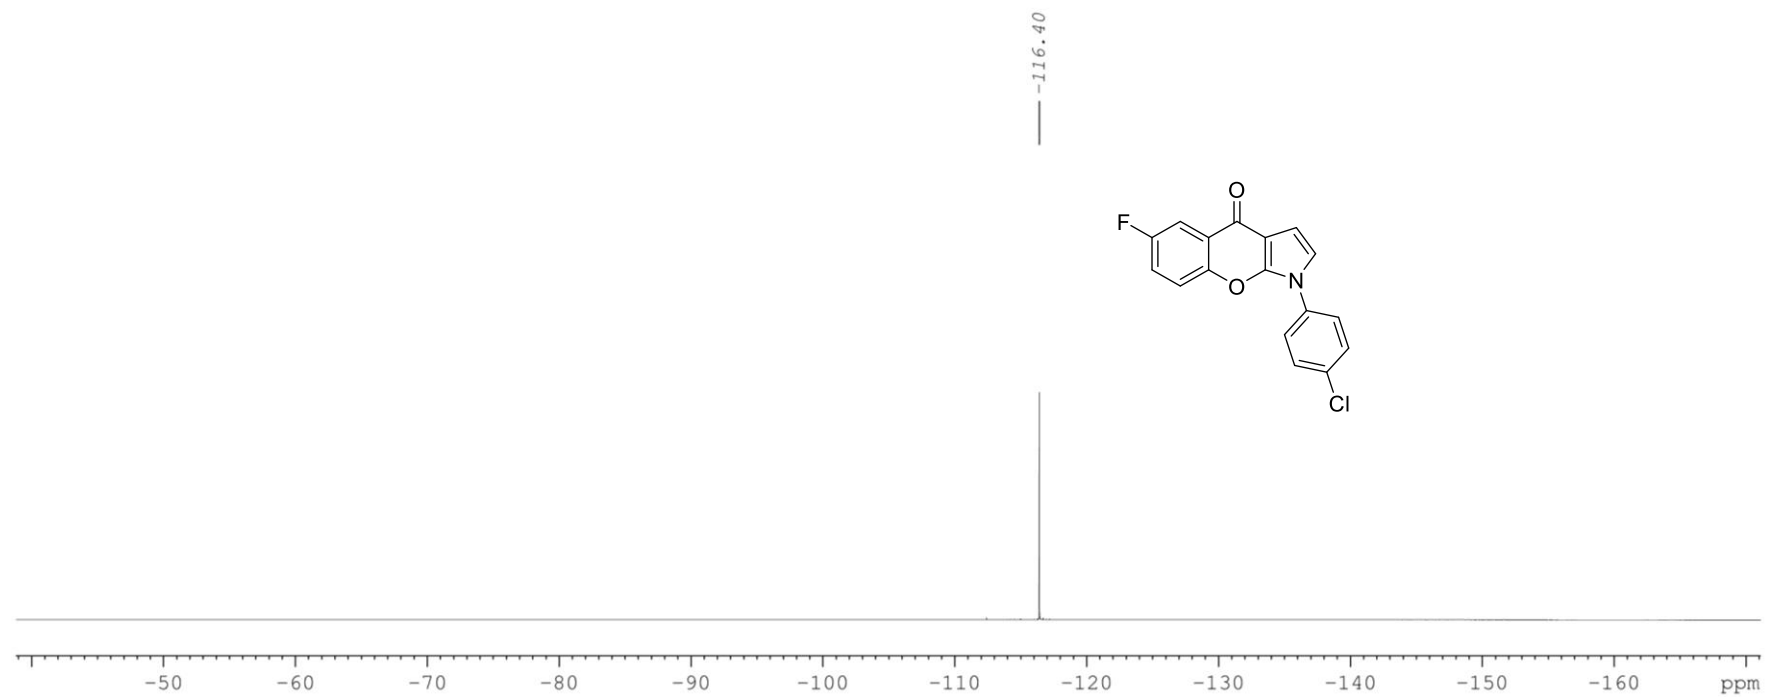

**Figure S30.**  $^{19}\text{F}$  NMR (564 MHz,  $\text{CDCl}_3$ ) spectra of compound **3e**

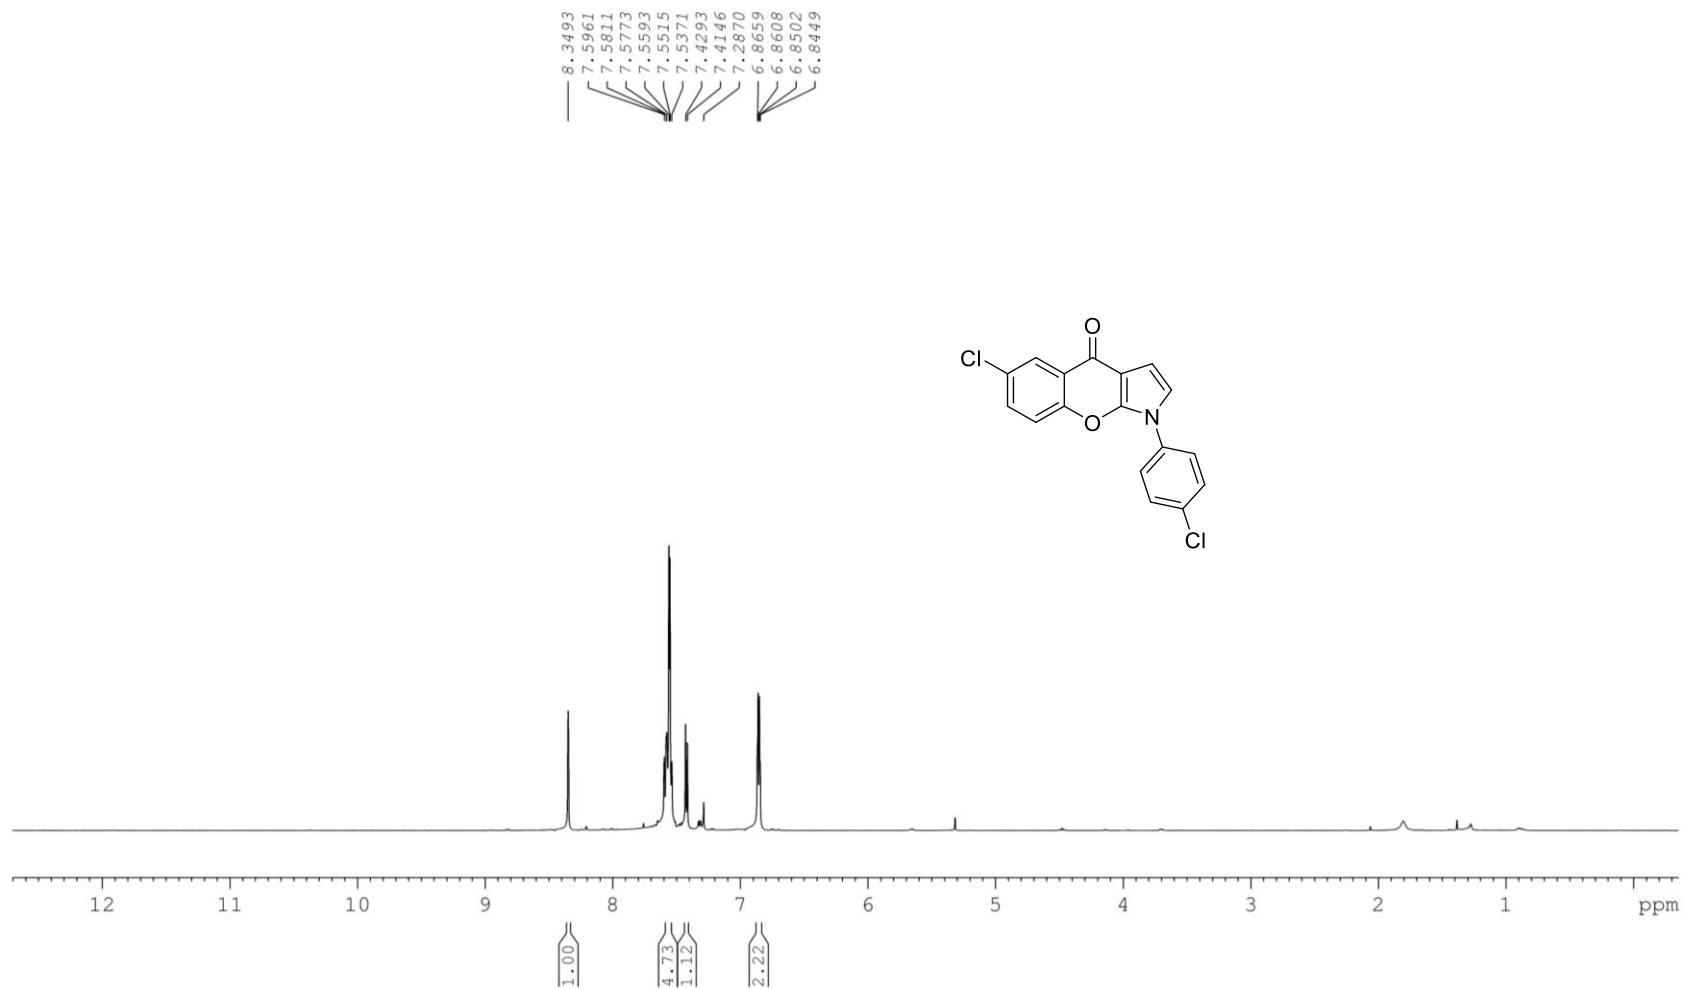

**Figure S31.** <sup>1</sup>H NMR (600 MHz, CDCl<sub>3</sub>) spectra of compound **3f**



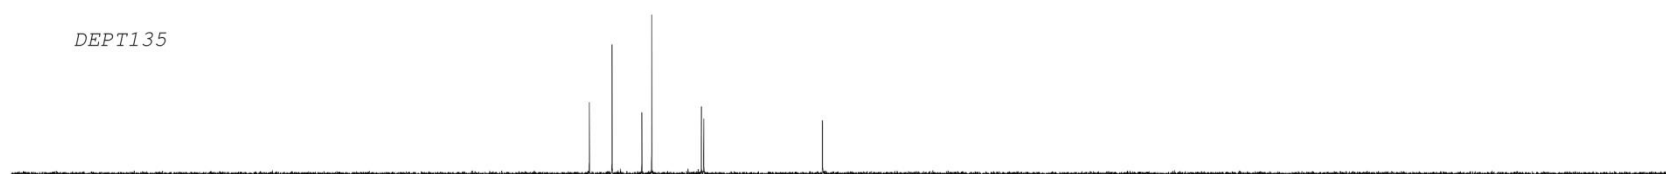

YUNNAN UNIVERSITY ASCEND AVIIIHD600 CHF-13  
Aug16-2021-chenli  
C13CPD CDC13

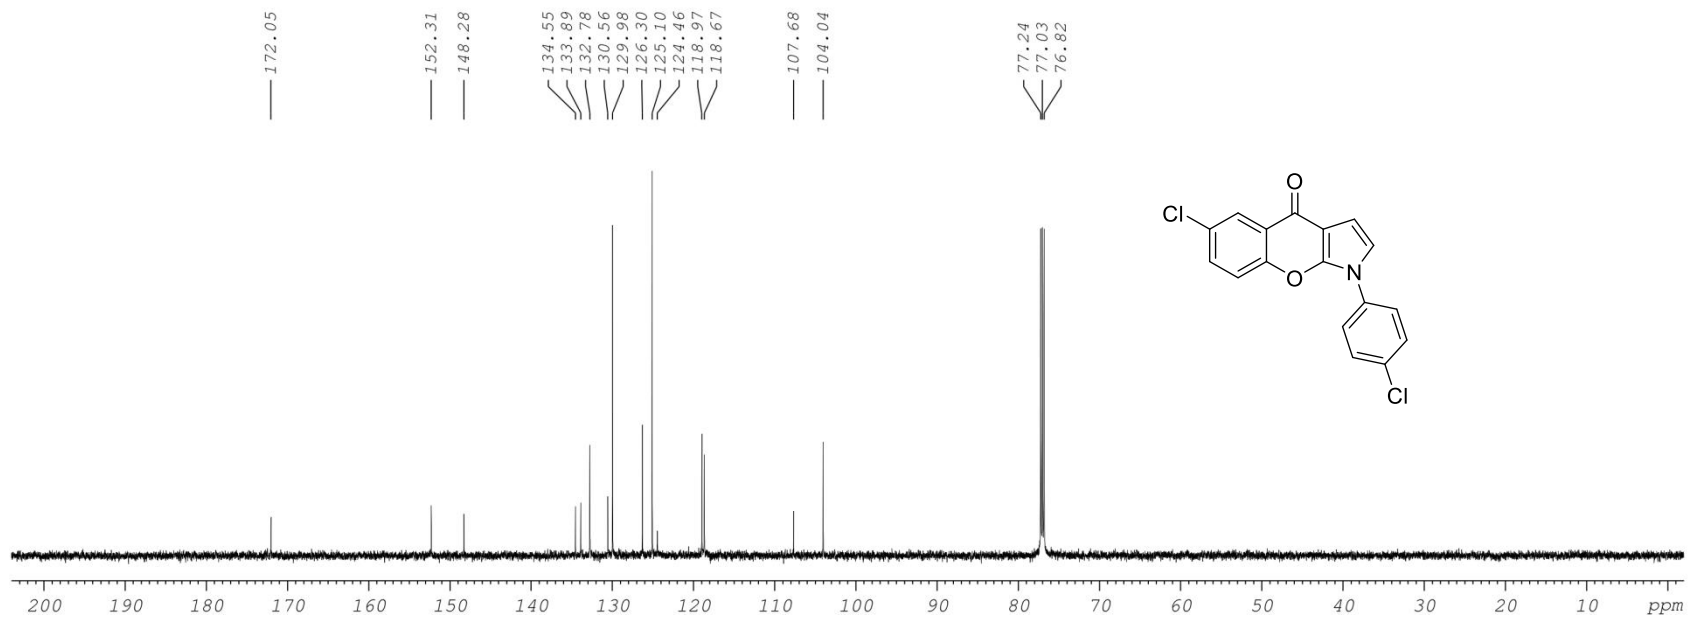

Figure S32.  $^{13}\text{C}$  NMR (150 MHz,  $\text{CDCl}_3$ ) spectra of compound **3f**

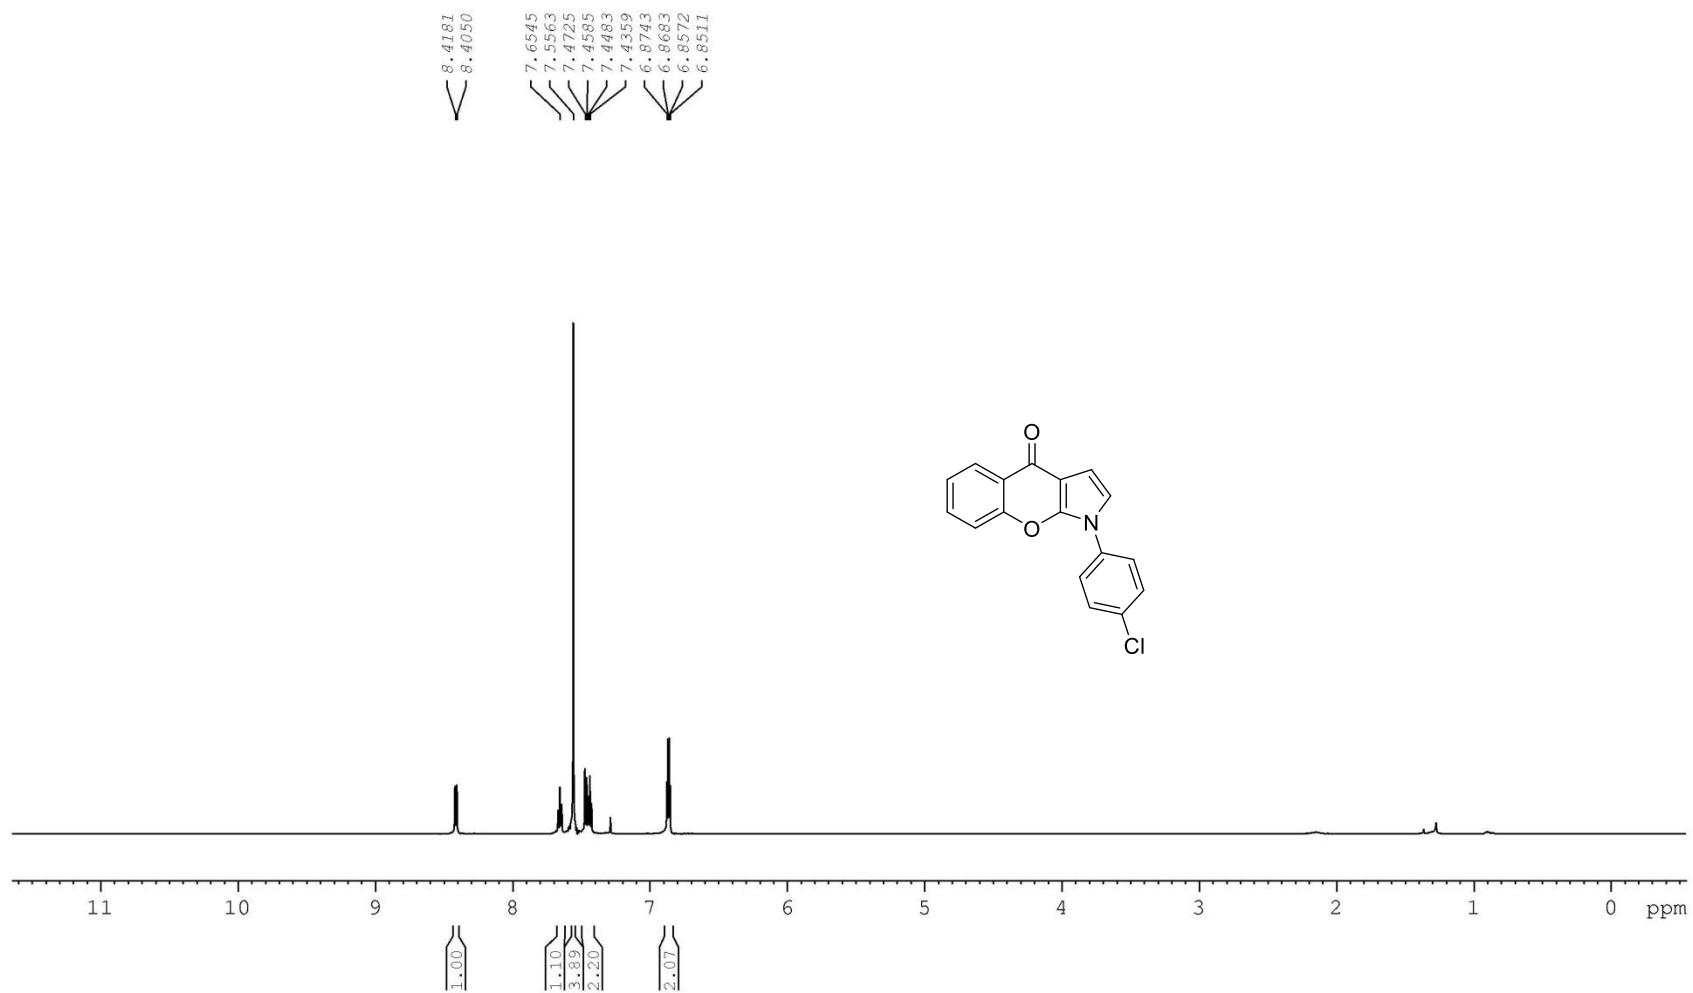

Figure S33.  $^1\text{H}$  NMR (600 MHz,  $\text{CDCl}_3$ ) spectra of compound 3g

DEPT135

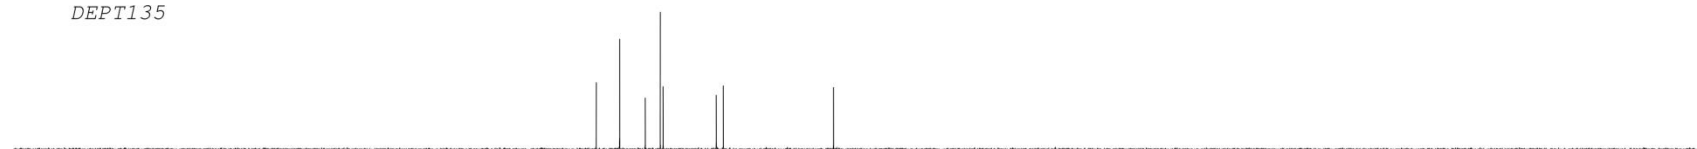

YUNNAN UNIVERSITY ASCEND AVIIIHD600 CLF-10-2  
Jul27-2021-yanshengjiao  
C13CPD CDC13

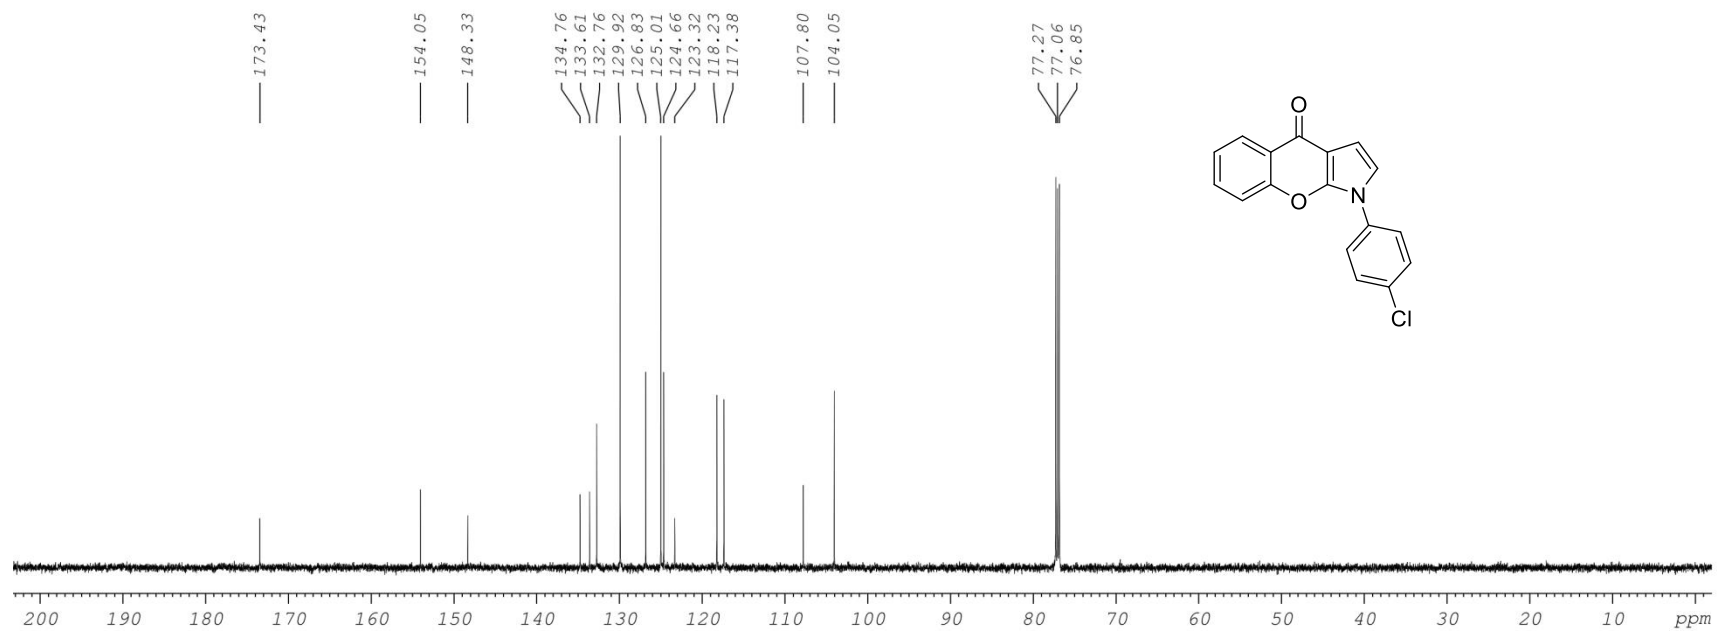

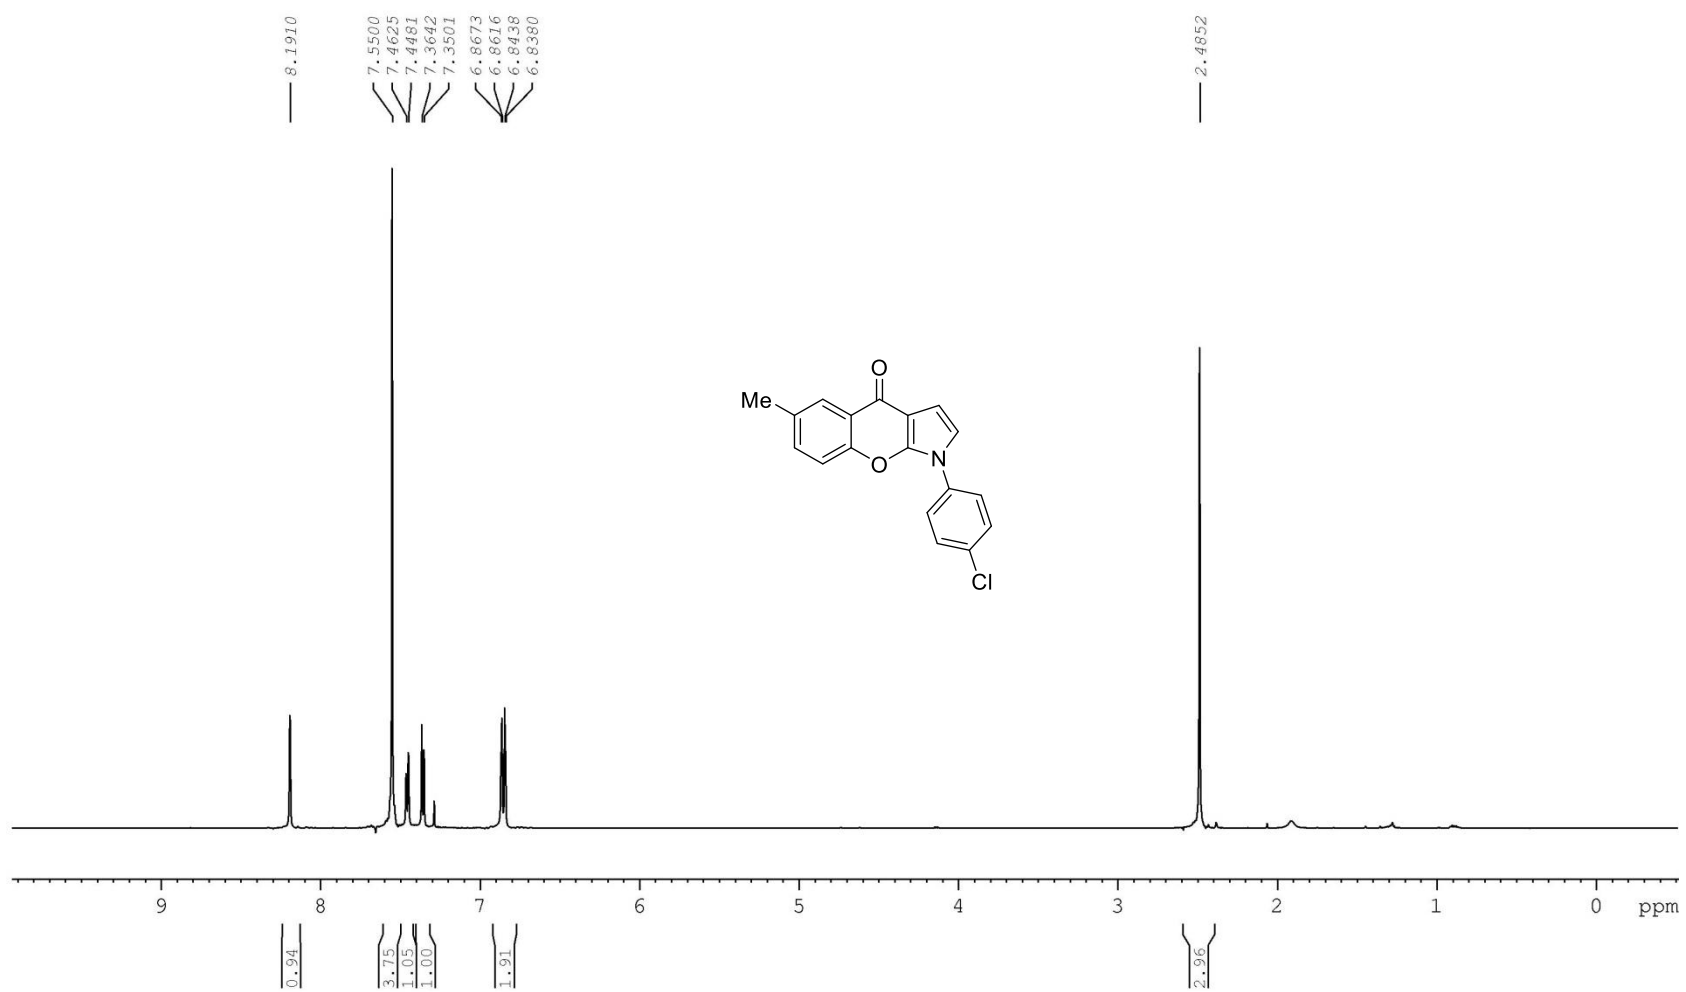

**Figure S35.**  $^1\text{H NMR}$  (600 MHz,  $\text{CDCl}_3$ ) spectra of compound **3h**

DEPT135

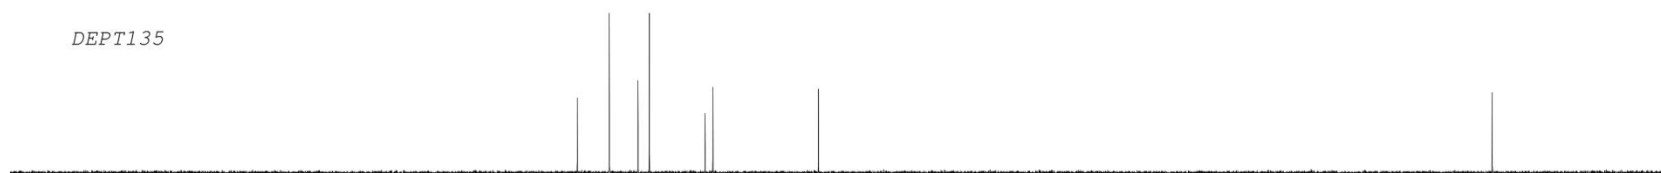

YUNNAN UNIVERSITY ASCEND AVIIIHD600 CLF-12  
Aug10-2021-chenli  
C13CPD CDC13

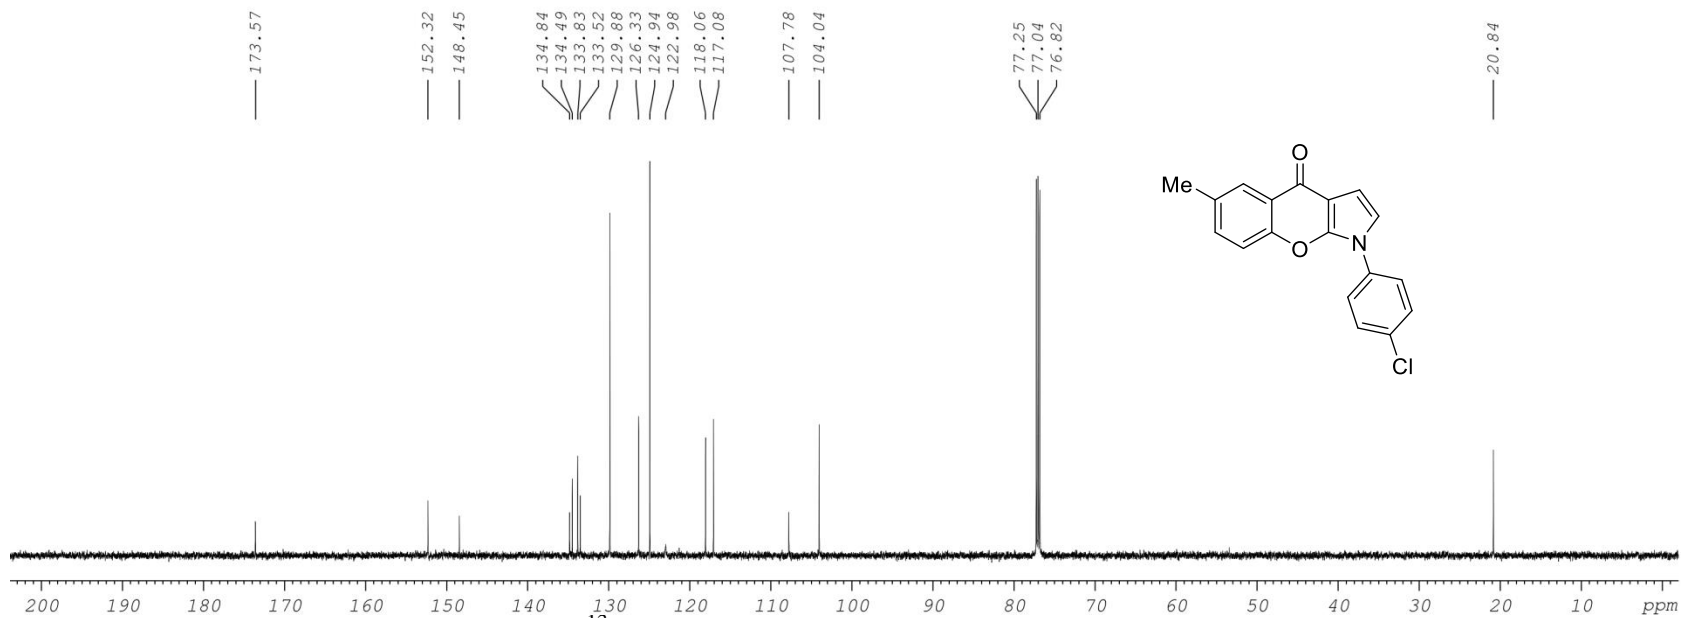

Figure S36.  $^{13}\text{C}$  NMR (150 MHz,  $\text{CDCl}_3$ ) spectra of compound 3h

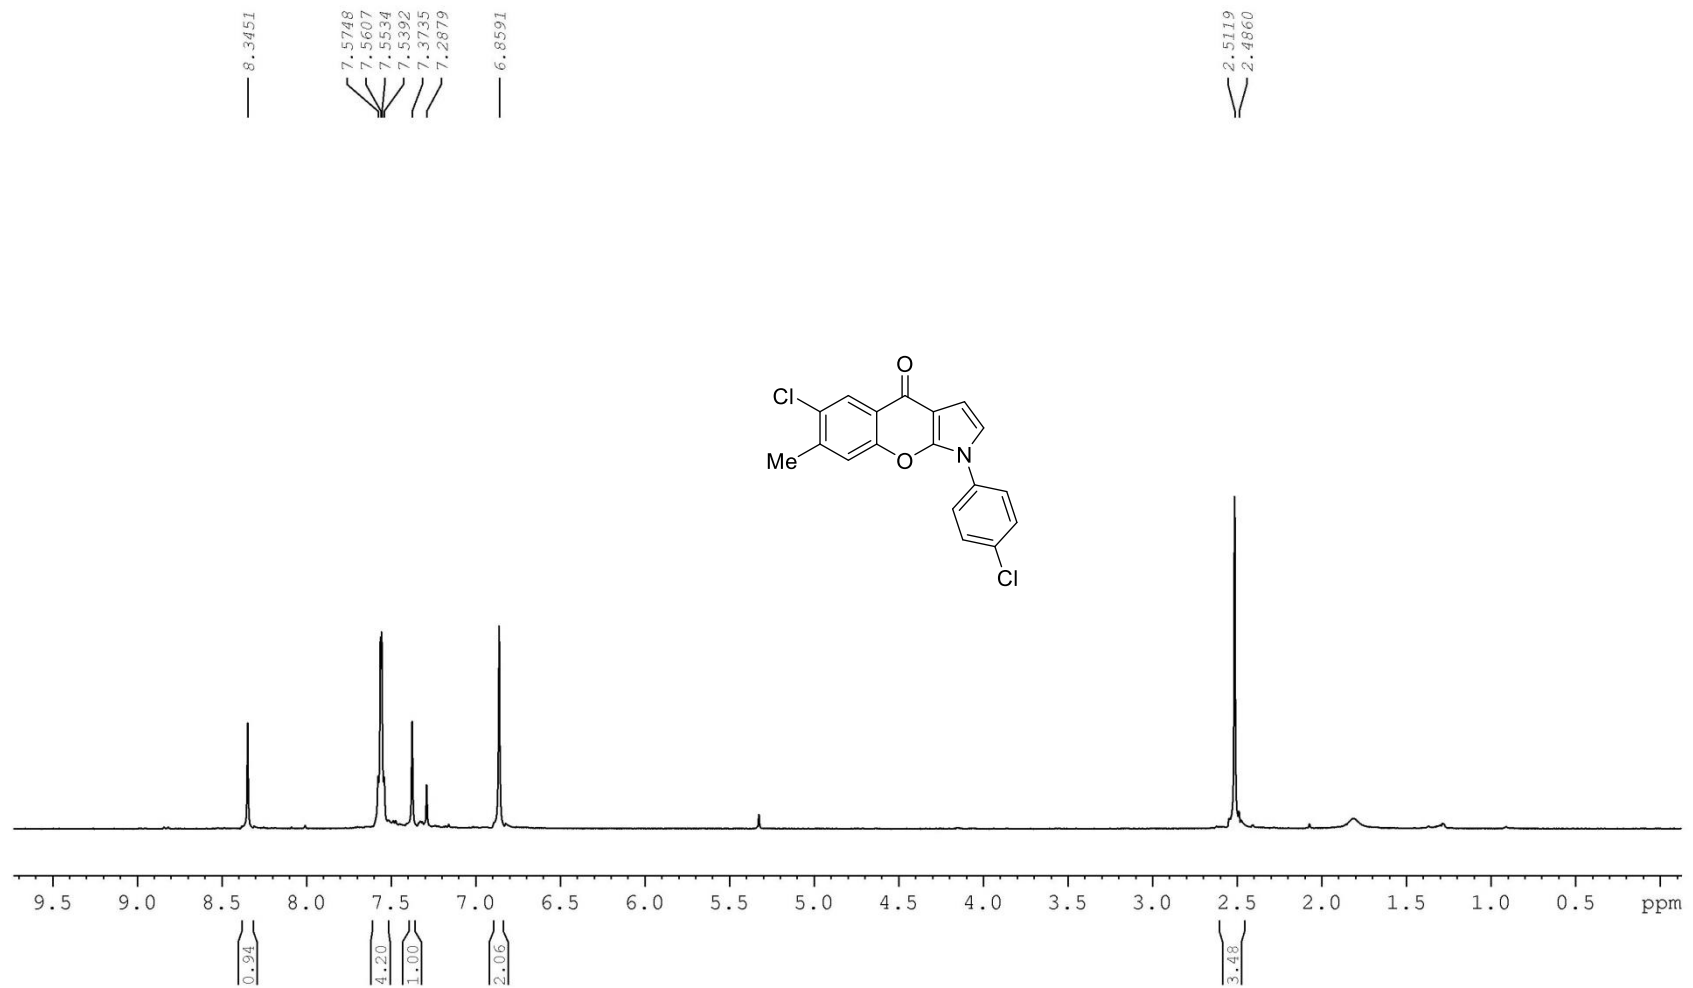

**Figure S37.** <sup>1</sup>H NMR (600 MHz, CDCl<sub>3</sub>) spectra of compound **3i**

DEPT135

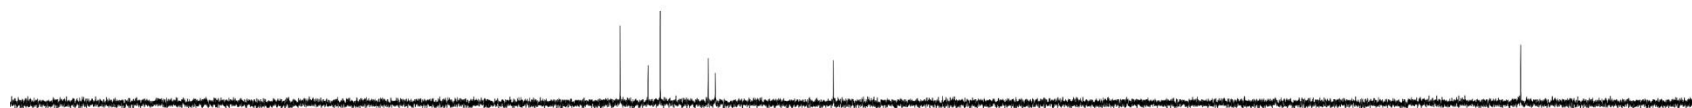

YUNNAN UNIVERSITY ASCEND AVIIIHD600 CLF-09-2  
Jul21-2021-chenli  
C13CPD CDC13

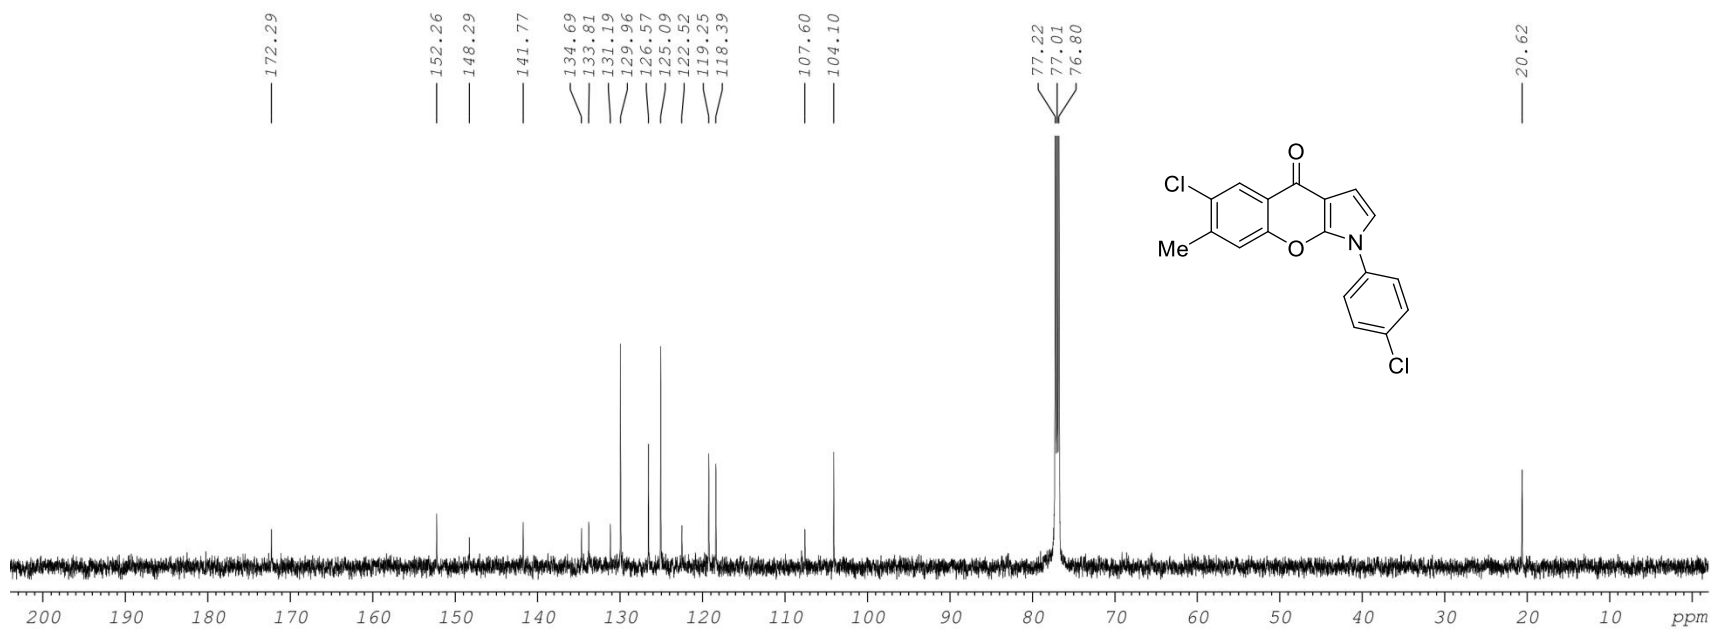

Figure S38.  $^{13}\text{C}$  NMR (150 MHz,  $\text{CDCl}_3$ ) spectra of compound **3i**

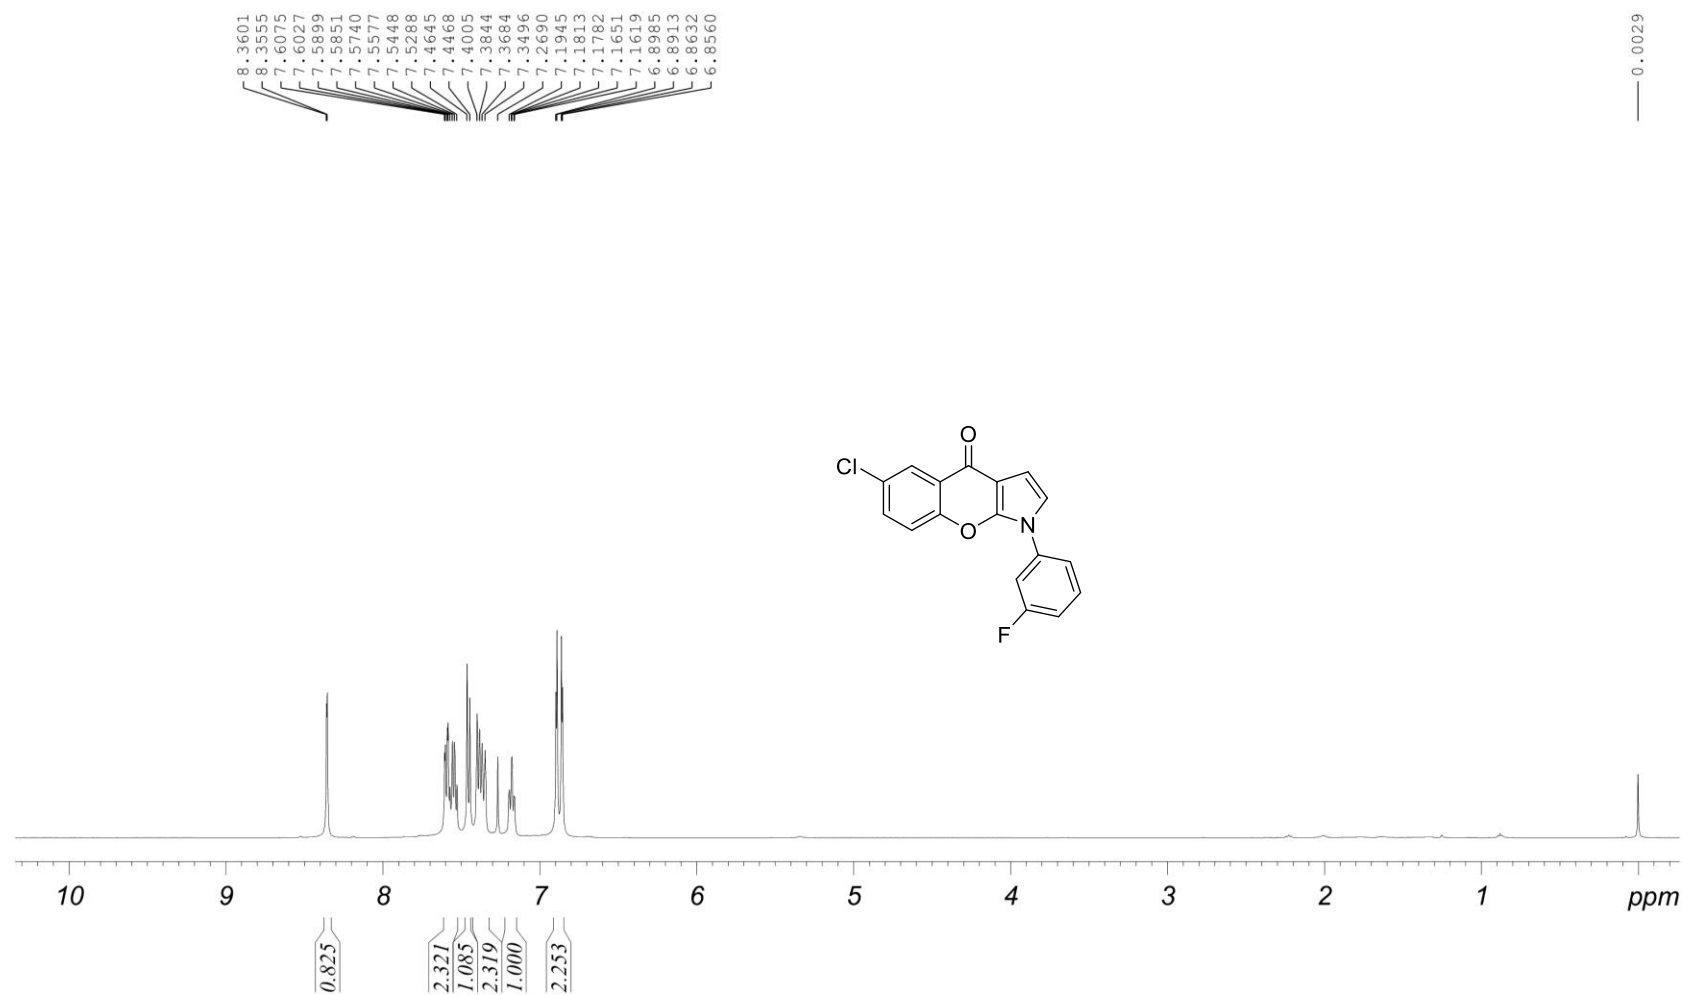

**Figure S39.**  $^1\text{H}$  NMR (500 MHz,  $\text{CDCl}_3$ ) spectra of compound **3j**



DEPT135

YunNan University AVANCEHDIII 500M CLF-31-2  
Aug02-2022-chenli  
C13CPD CDC13

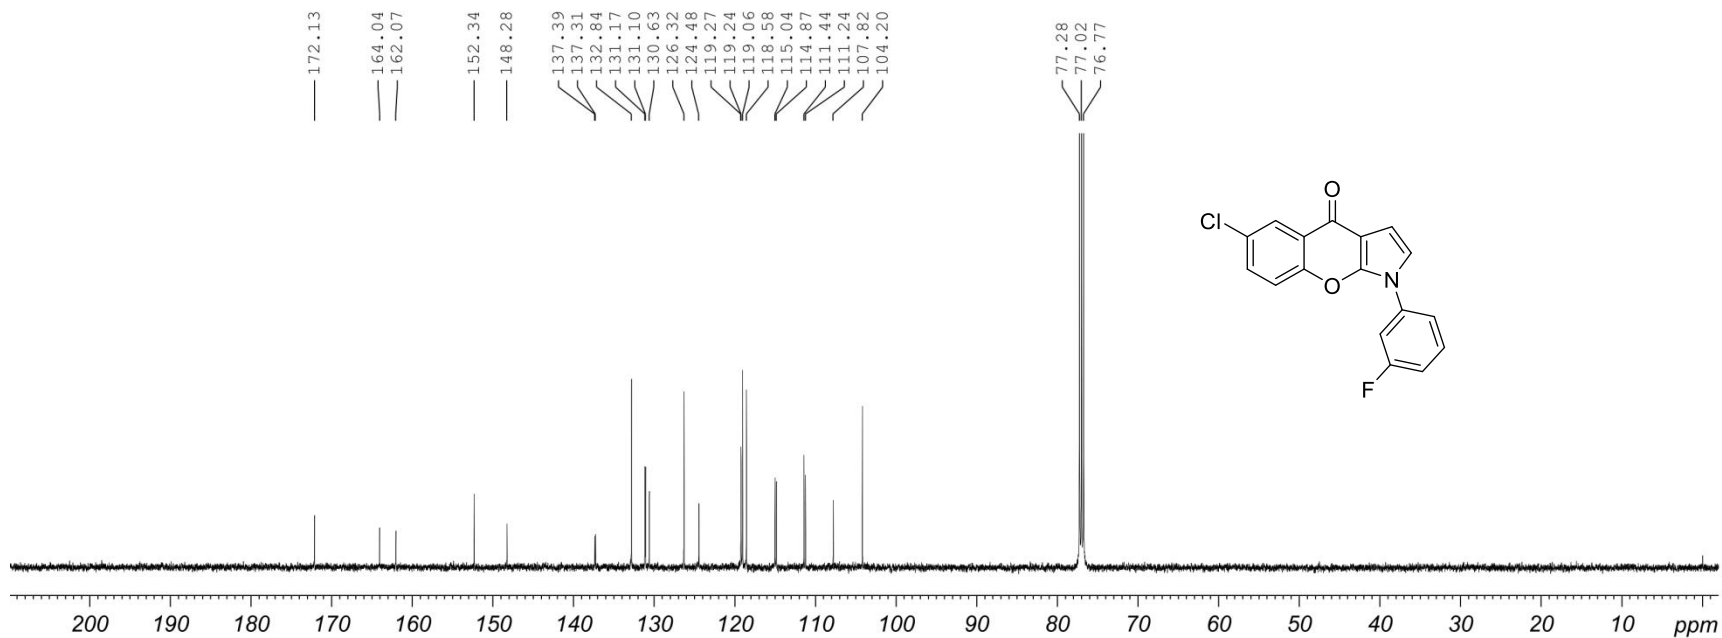

Figure S40.  $^{13}\text{C}$  NMR (125 MHz,  $\text{CDCl}_3$ ) spectra of compound **3j**

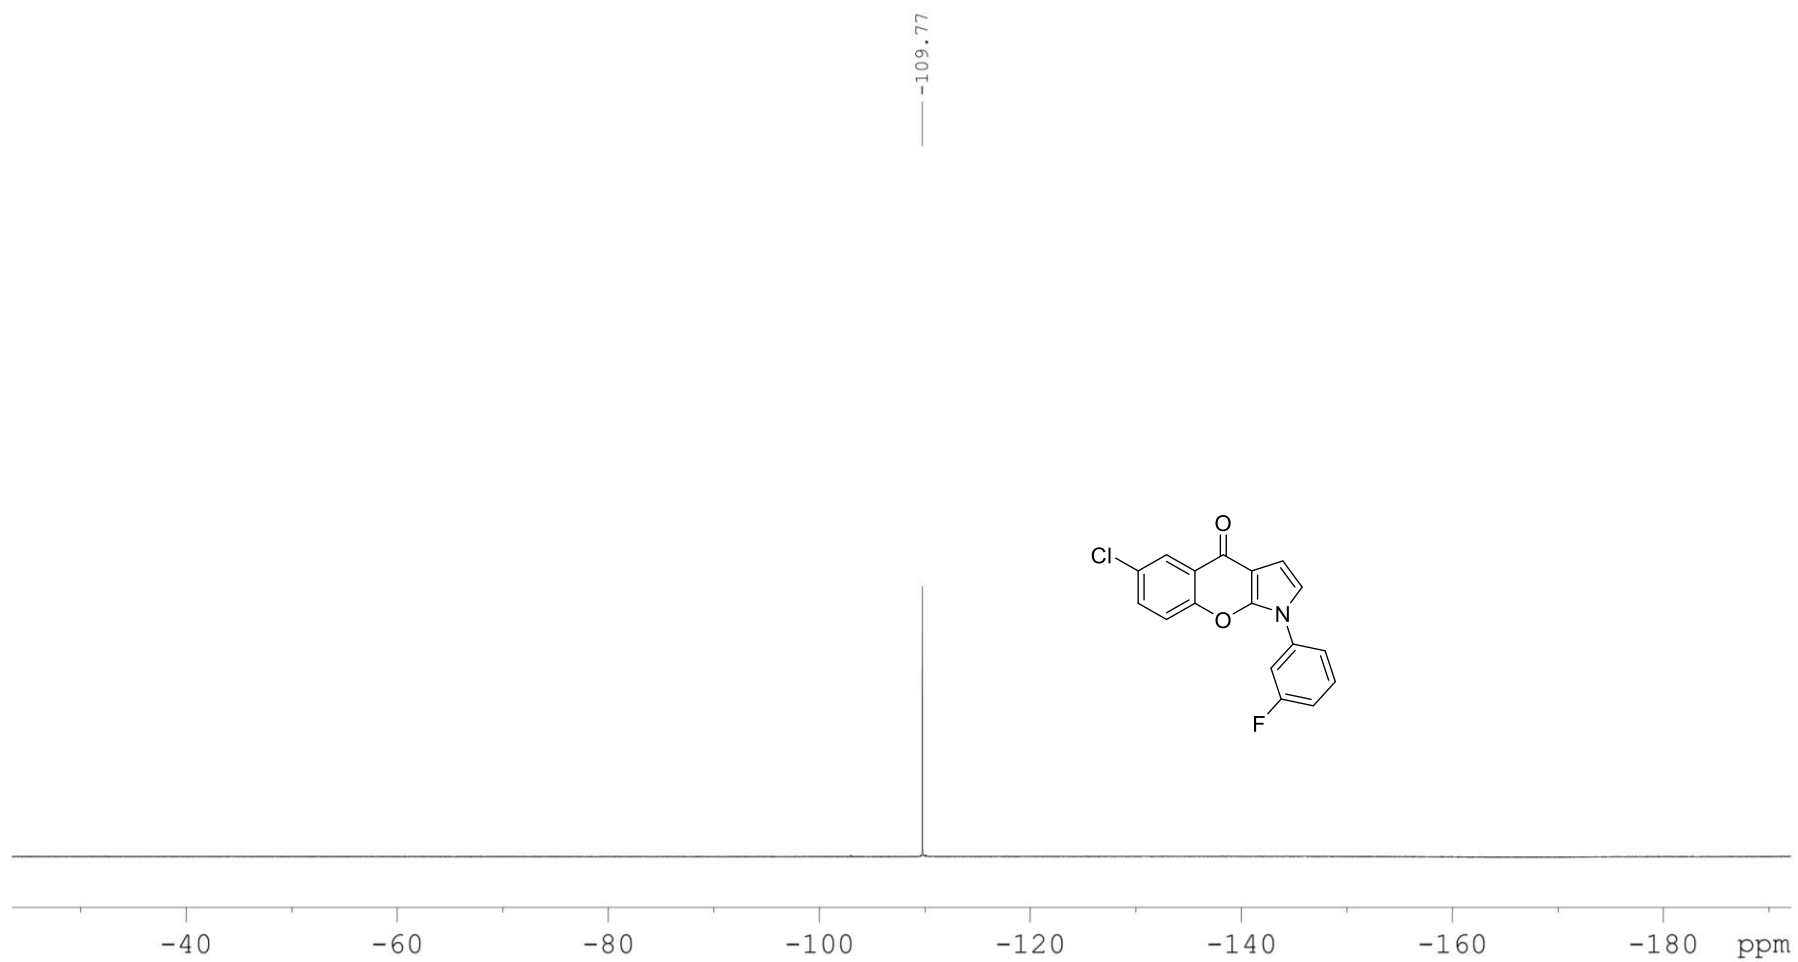

**Figure S41.**  $^{19}\text{F}$  NMR (470 MHz,  $\text{CDCl}_3$ ) spectra of compound **3j**

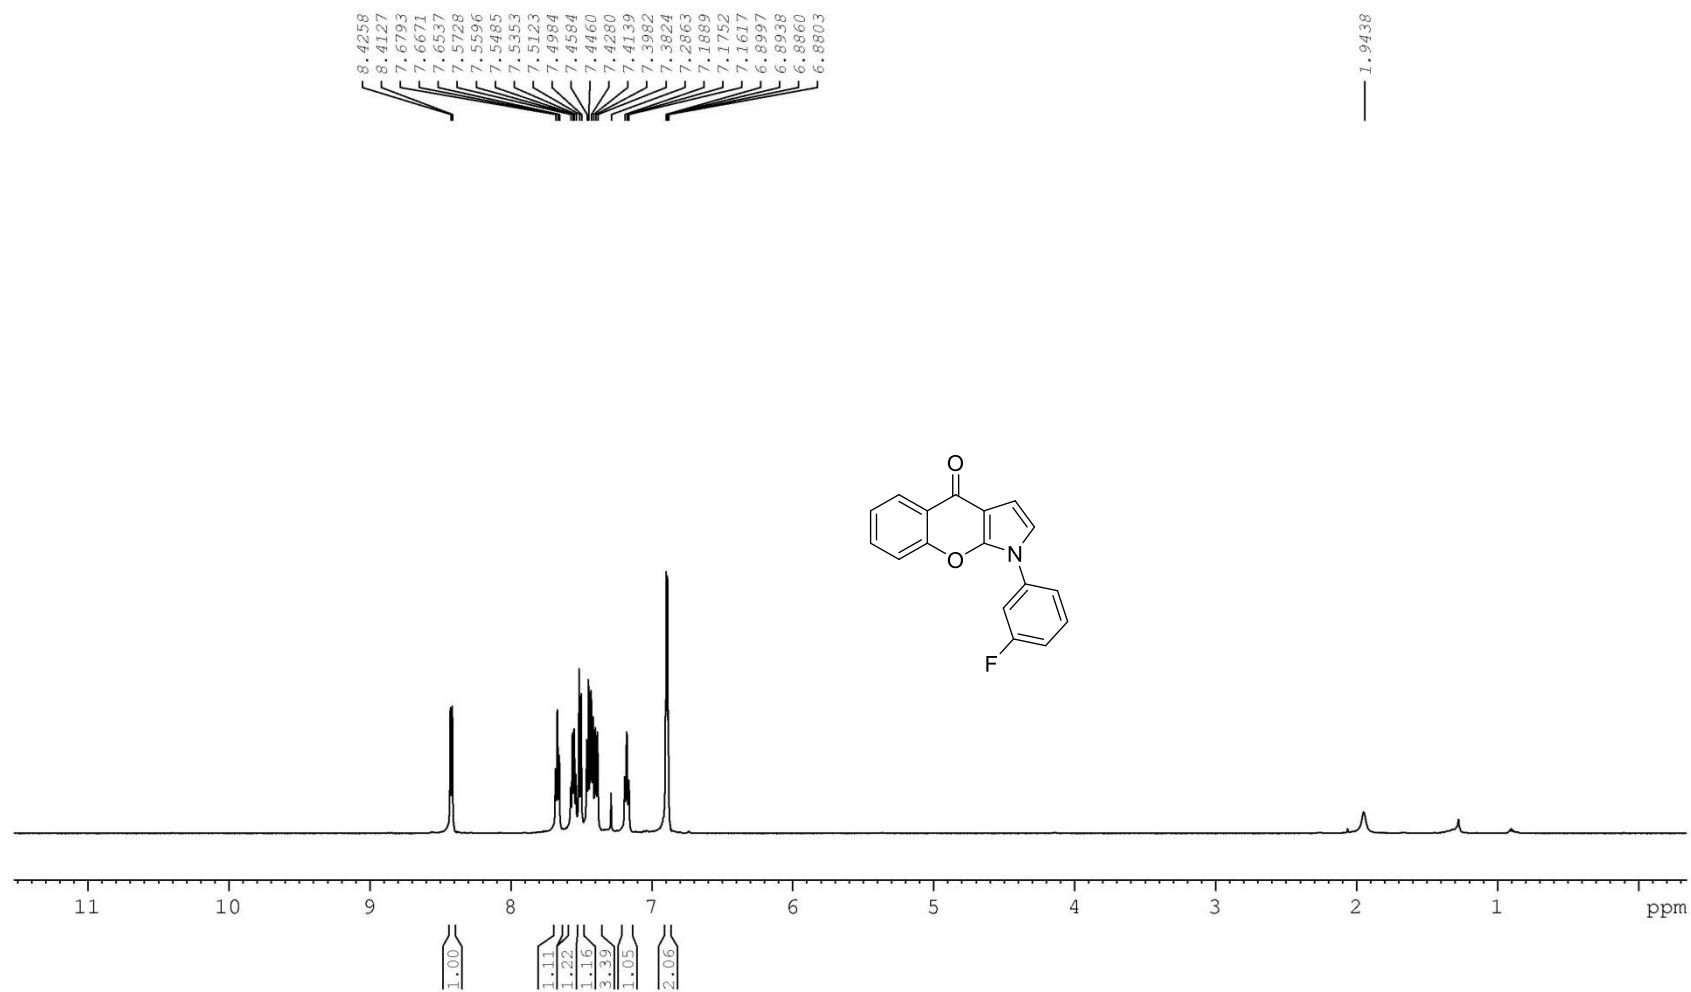

**Figure S42.**  $^1\text{H}$  NMR (600 MHz,  $\text{CDCl}_3$ ) spectra of compound **3k**

DEPT135

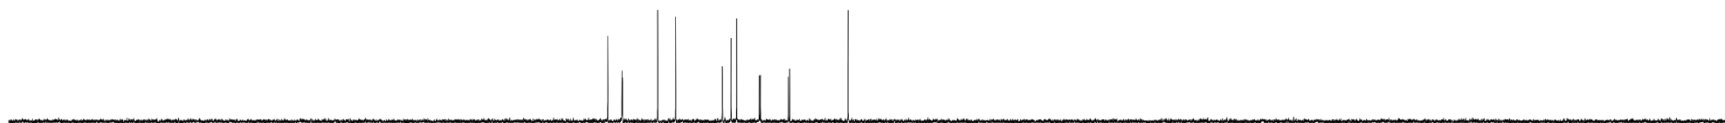

YUNNAN UNIVERSITY ASCEND AVIIIHD600 CLF-32-2  
Aug21-2021-chenli  
C13CPD CDC13

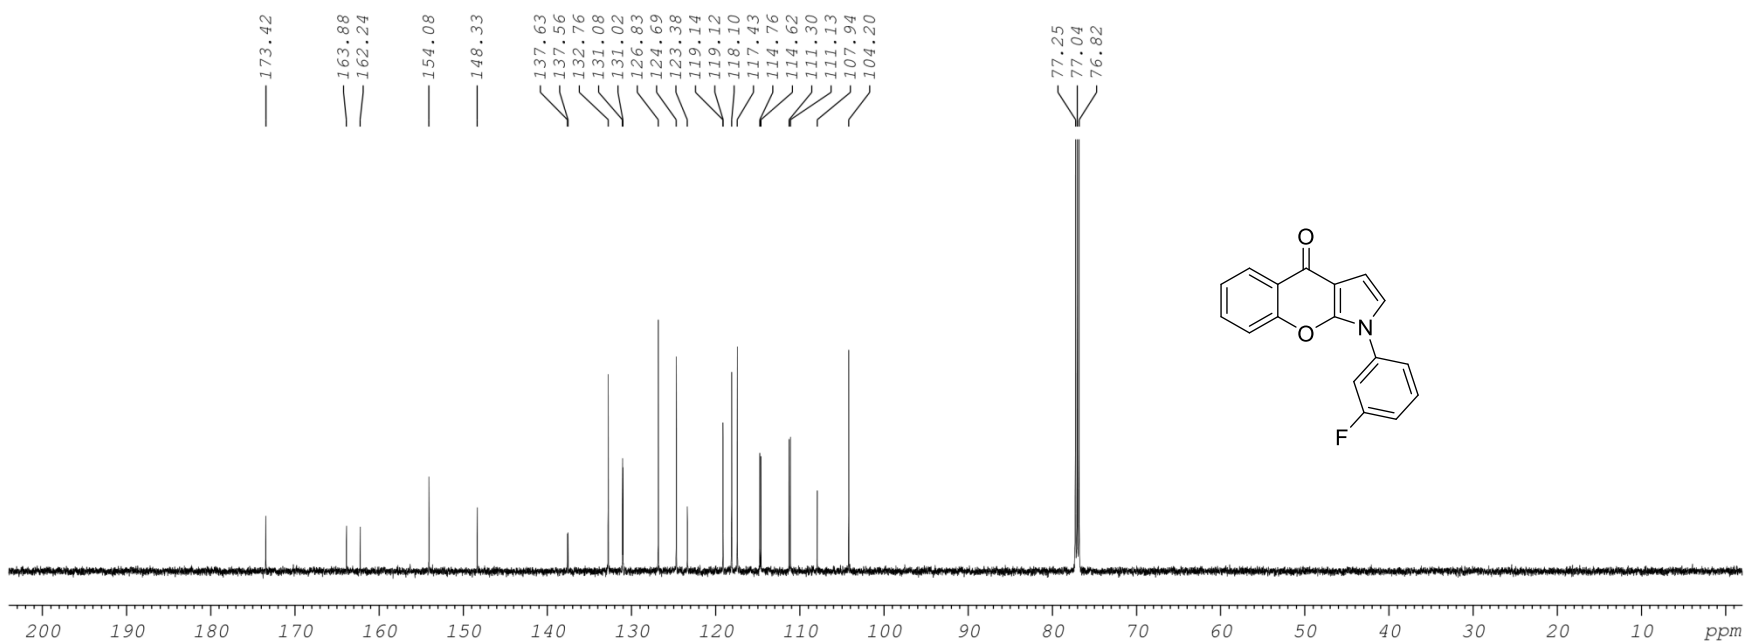

Figure S43.  $^{13}\text{C}$  NMR (150 MHz,  $\text{CDCl}_3$ ) spectra of compound 3k

YUNNAN UNIVERSITY ASCEND AVIIIHD600 CLF-32-2  
Aug21-2021-chenli  
F19CPD CDCl3

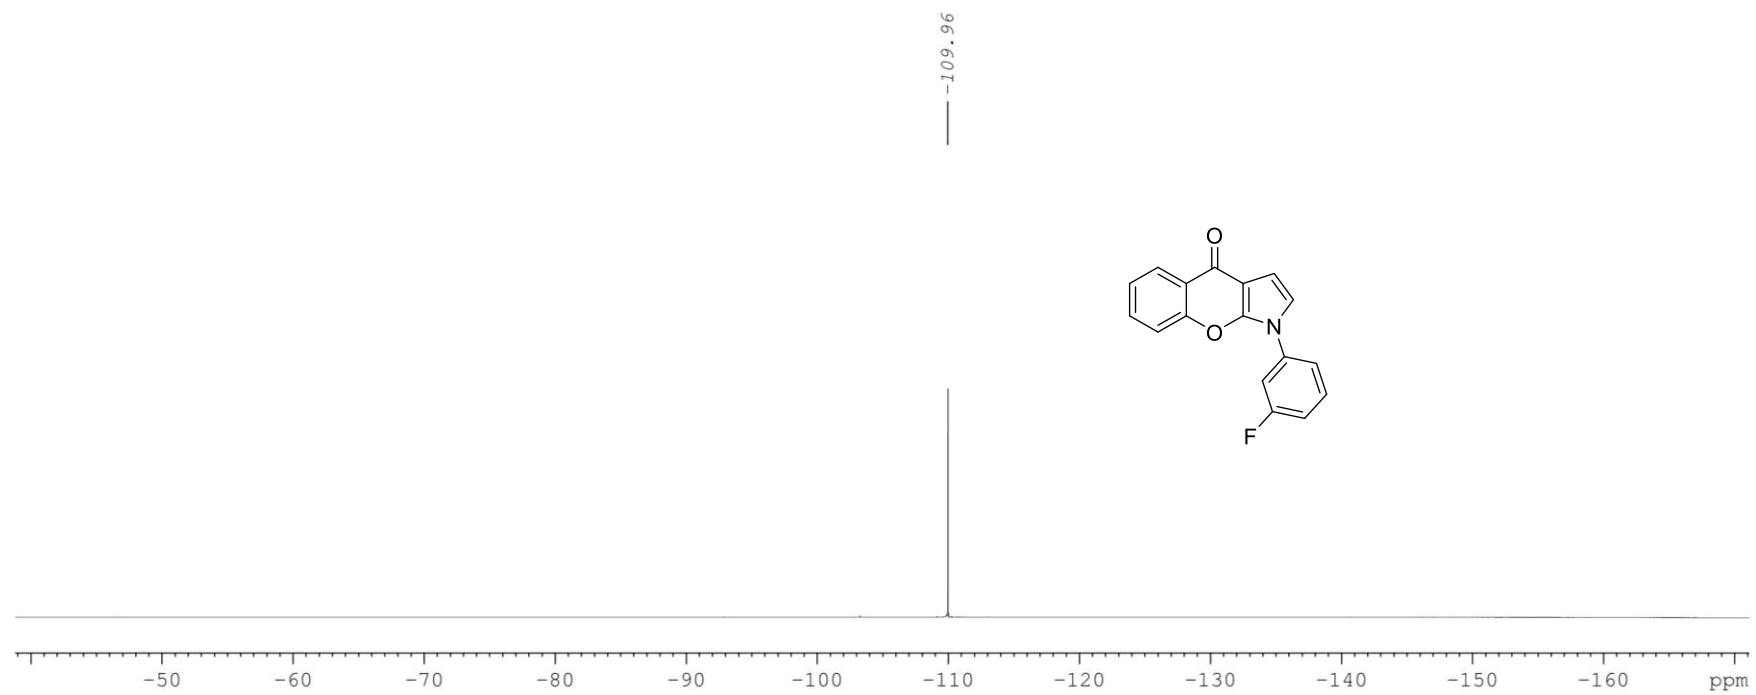

**Figure S44.**  $^{19}\text{F}$  NMR (564 MHz,  $\text{CDCl}_3$ ) spectra of compound **3k**

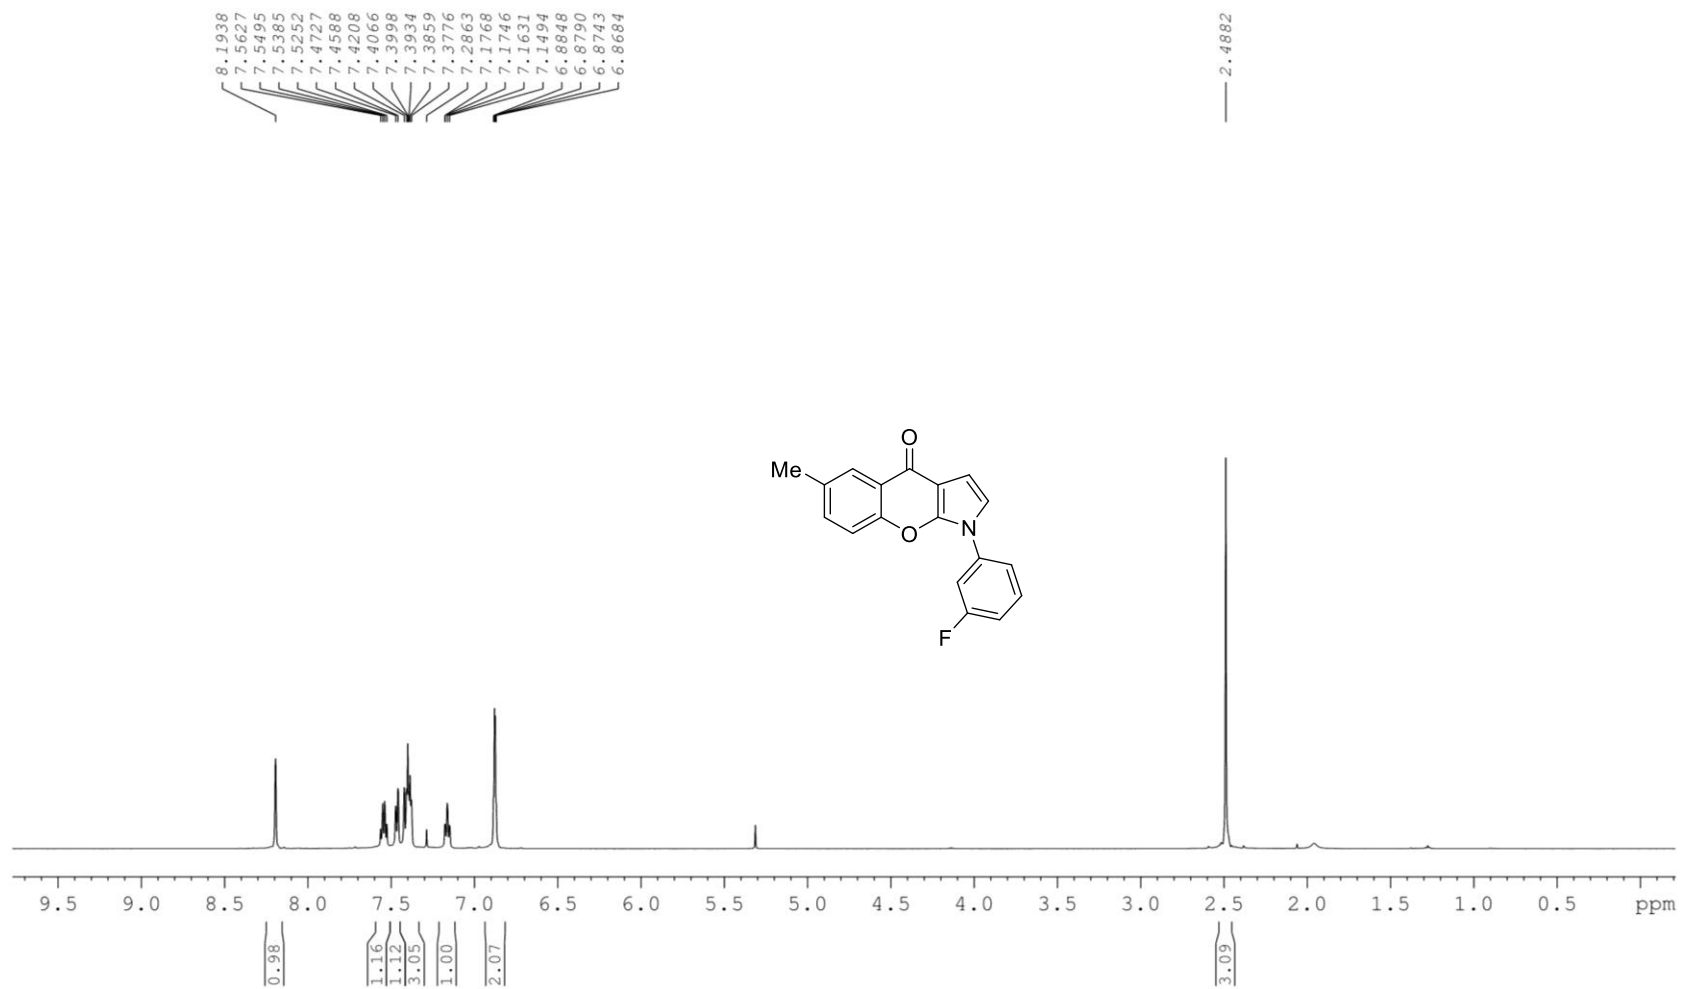

**Figure S45.**  $^1\text{H}$  NMR (600 MHz,  $\text{CDCl}_3$ ) spectra of compound **3l**

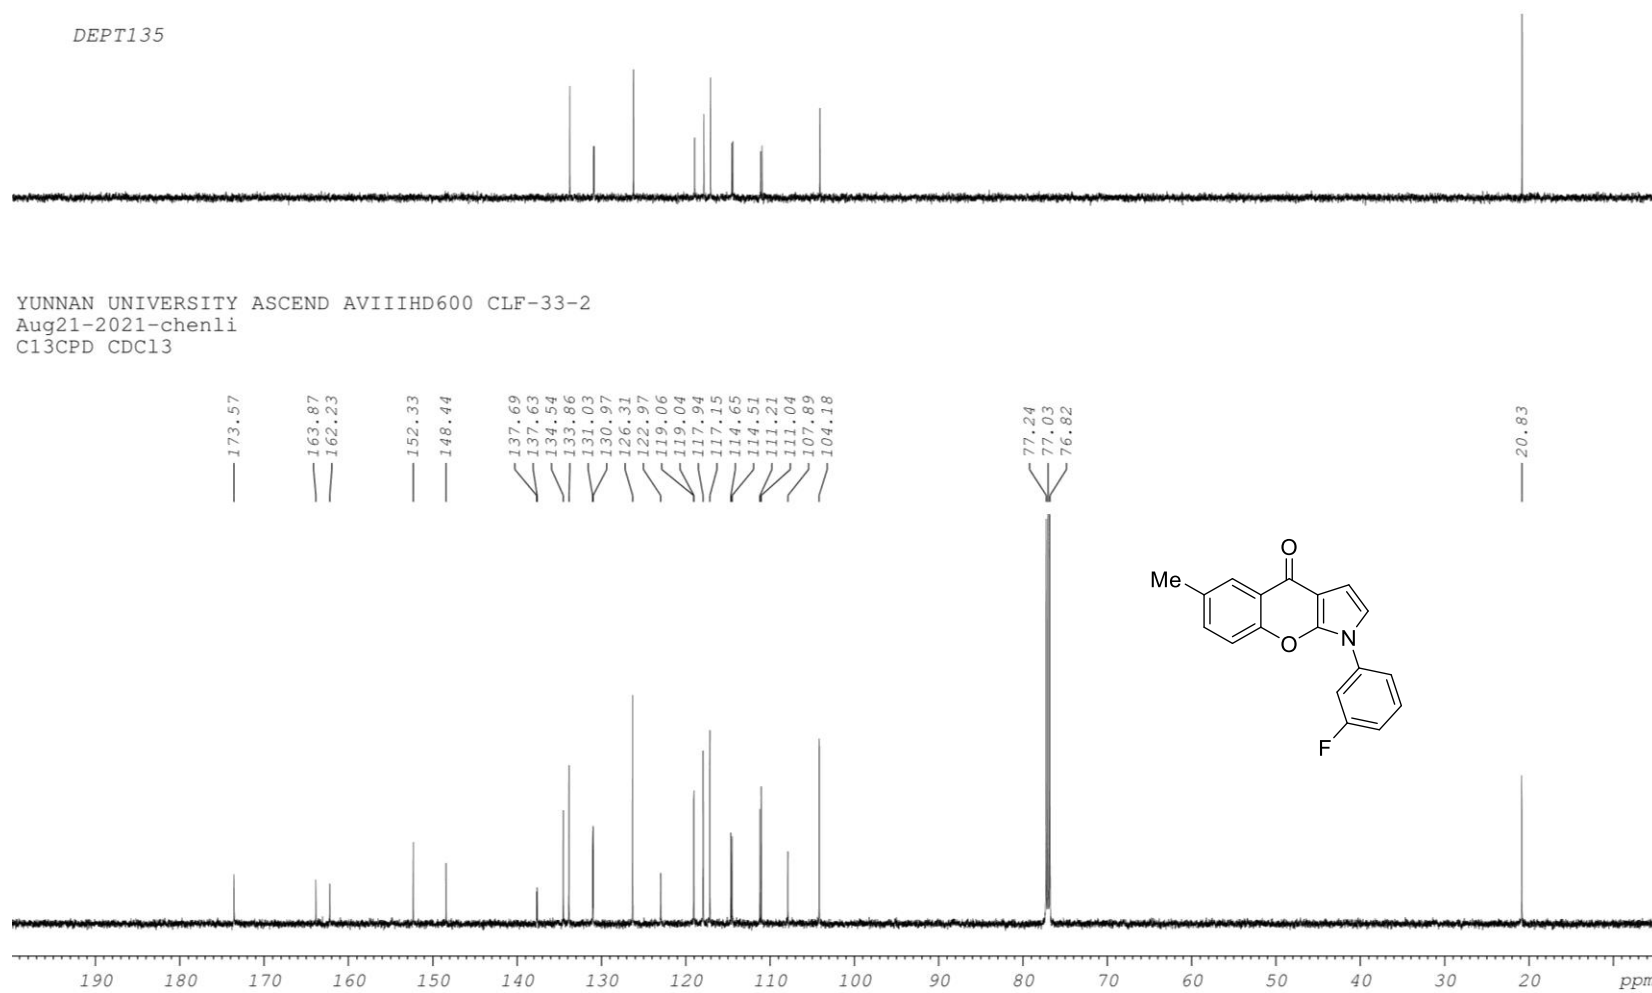

Figure S46. <sup>13</sup>C NMR (150 MHz, CDCl<sub>3</sub>) spectra of compound **31**

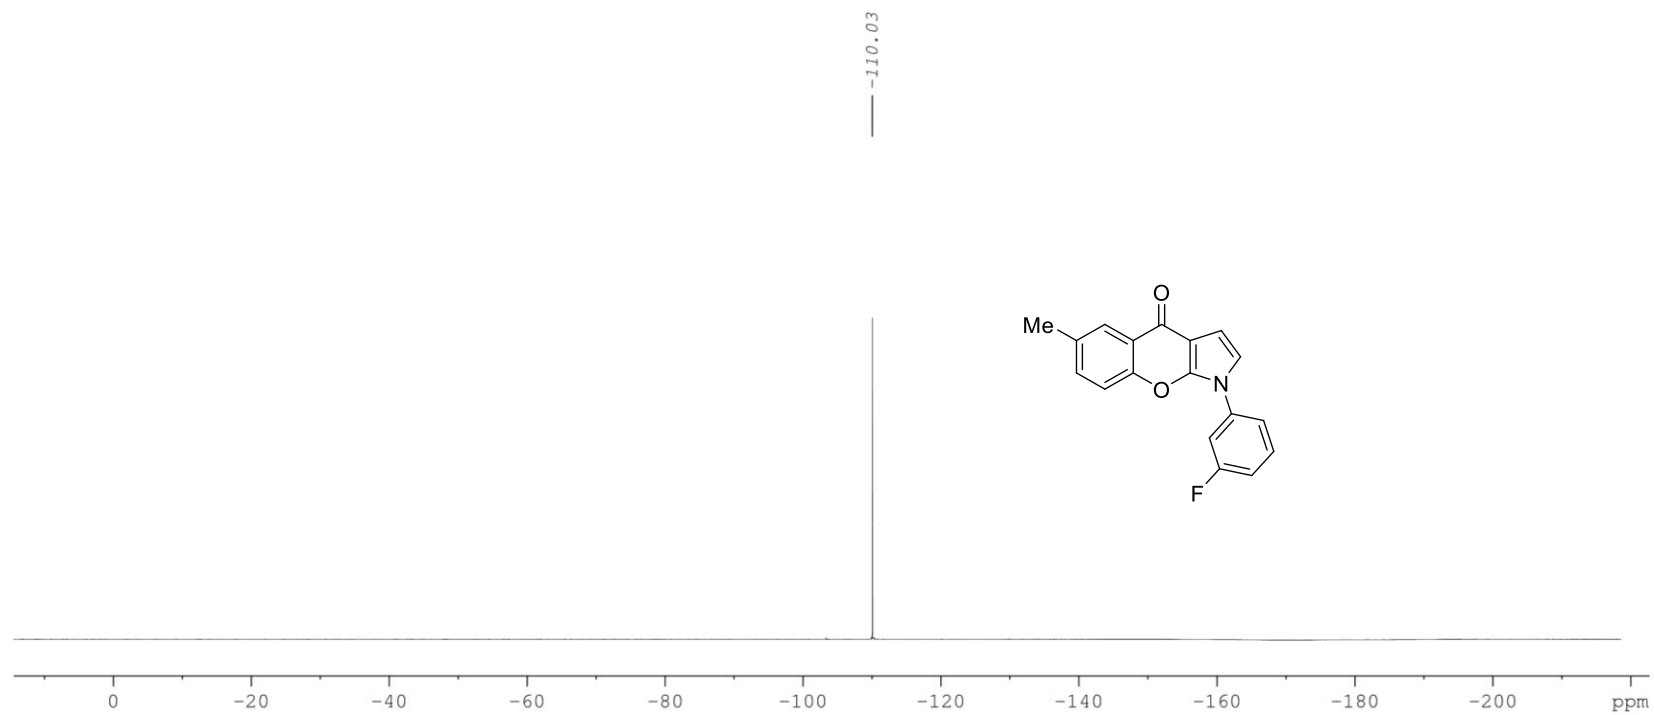

**Figure S47.**  $^{19}\text{F}$  NMR (564 MHz,  $\text{CDCl}_3$ ) spectra of compound **31**



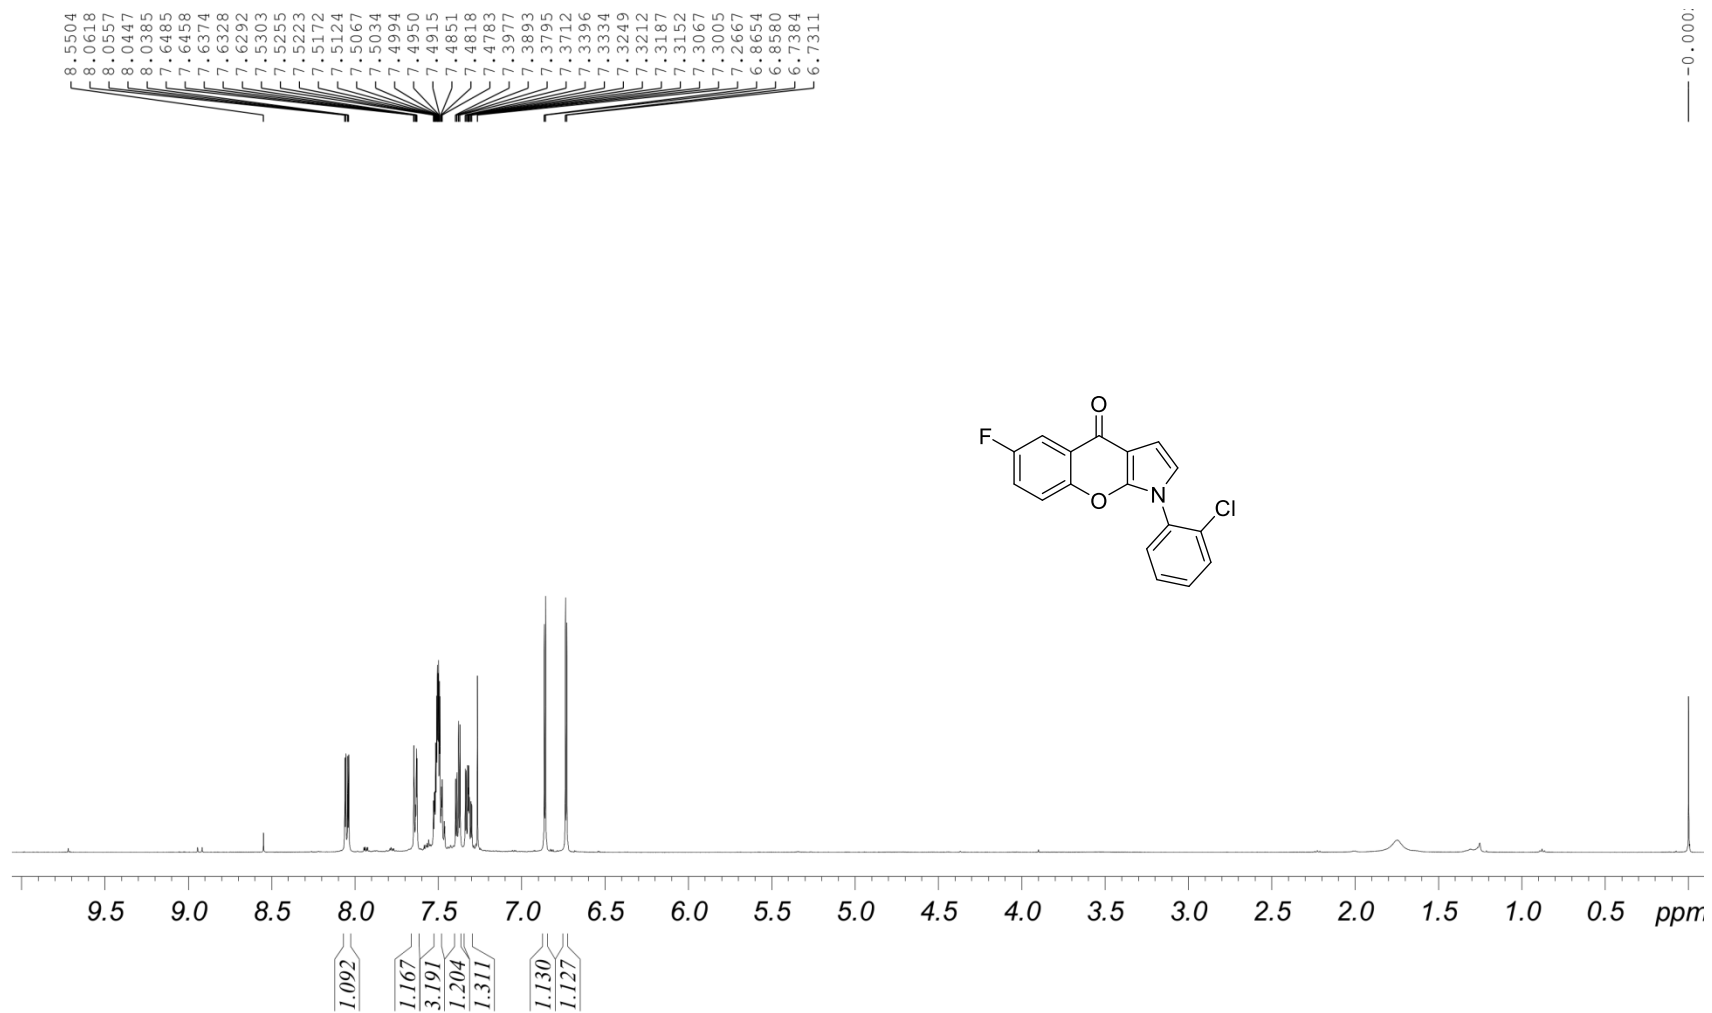

**Figure S48.**  $^1\text{H}$  NMR (500 MHz,  $\text{CDCl}_3$ ) spectra of compound **3m**

DEPT135

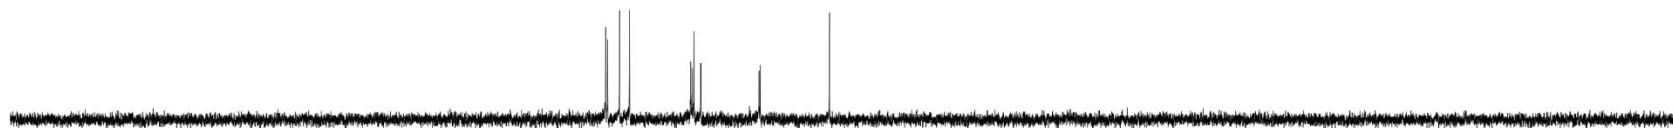

YUNNAN UNIVERSITY ASCEND AVIIIHD600 CLF-17-2  
Aug09-2021-chenli  
C13CPD CDC13

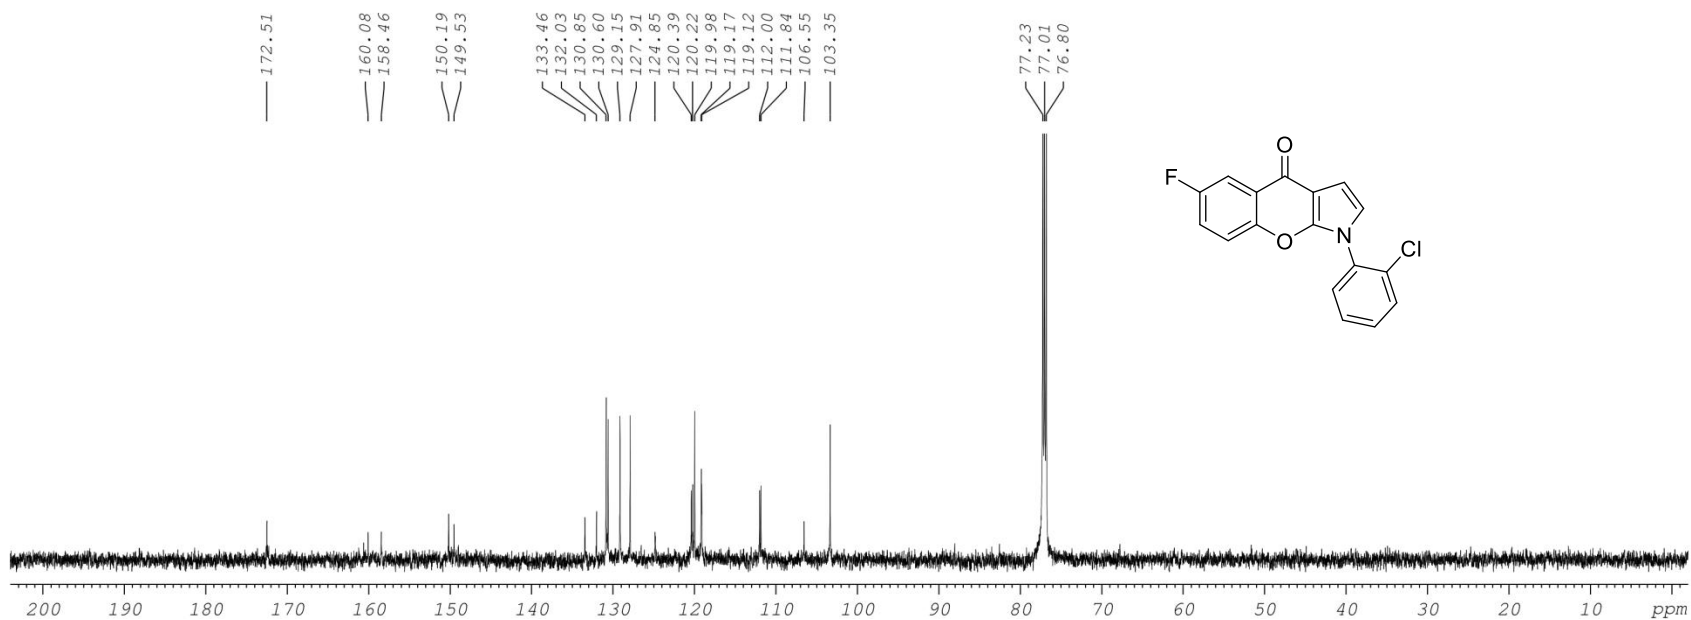

Figure S49.  $^{13}\text{C}$  NMR (150 MHz,  $\text{CDCl}_3$ ) spectra of compound 3m

YUNNAN UNIVERSITY ASCEND AVIIIHD600 CLF-17-2  
Aug09-2021-chenli  
F19CPD CDCl3

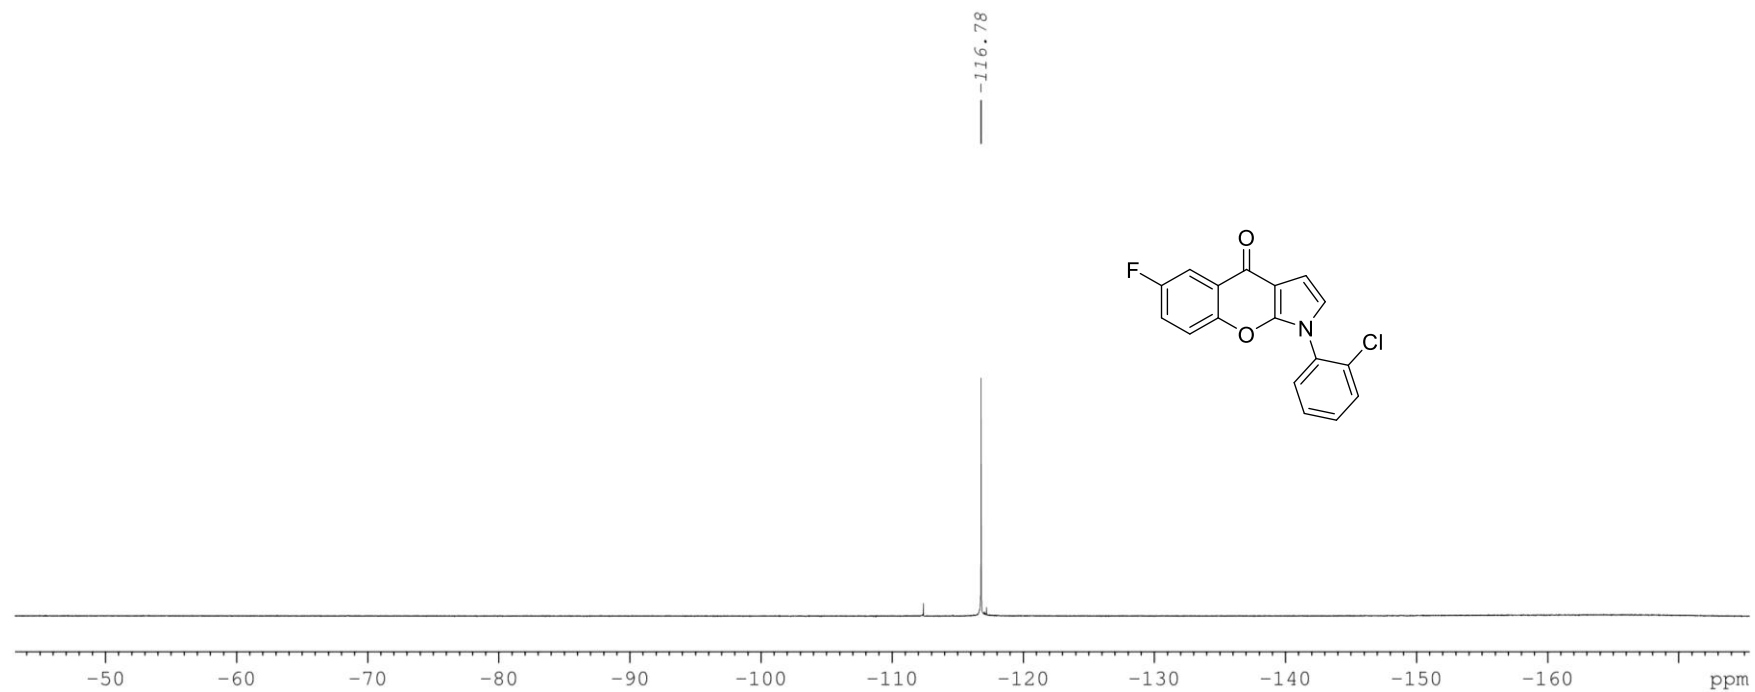

**Figure S50.**  $^{19}\text{F}$  NMR (564 MHz,  $\text{CDCl}_3$ ) spectra of compound **3m**

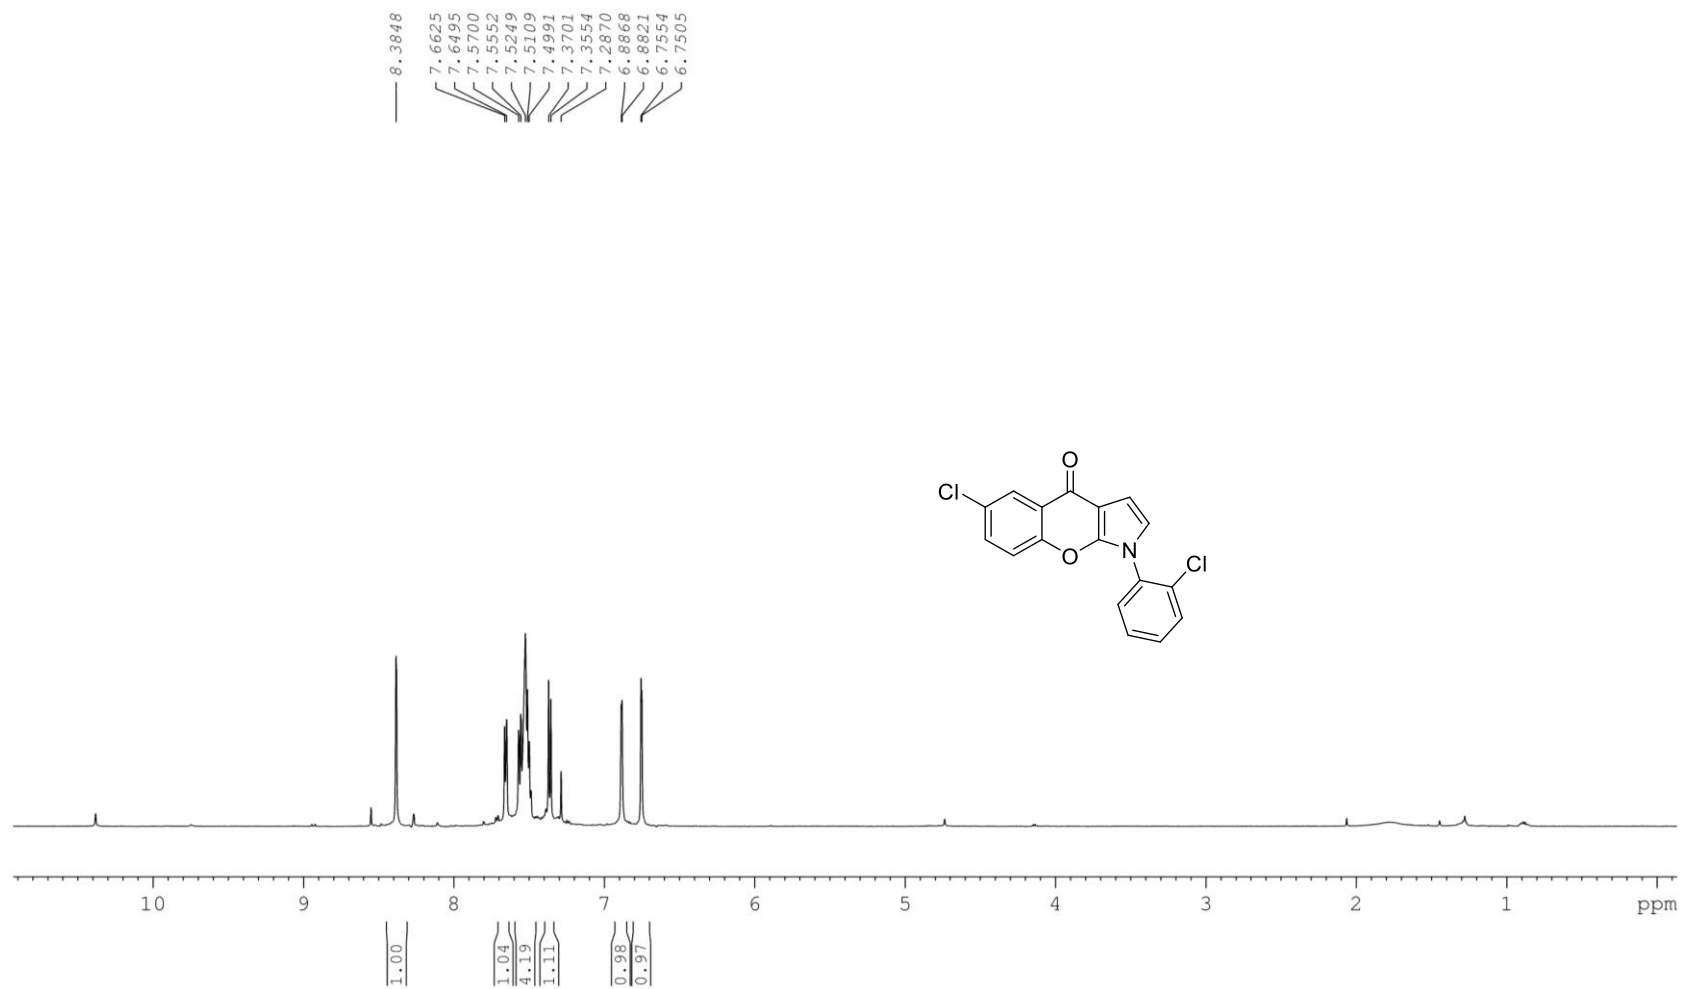

**Figure S51.** <sup>1</sup>H NMR (600 MHz, CDCl<sub>3</sub>) spectra of compound **3n**

DEPT135

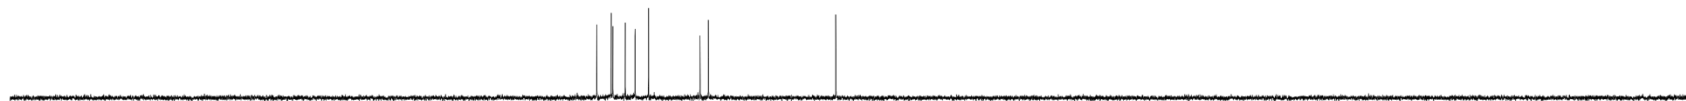

YUNNAN UNIVERSITY ASCEND AVIIIHD600 CLF-18-2  
Aug09-2021-chenli  
C13CPD CDC13

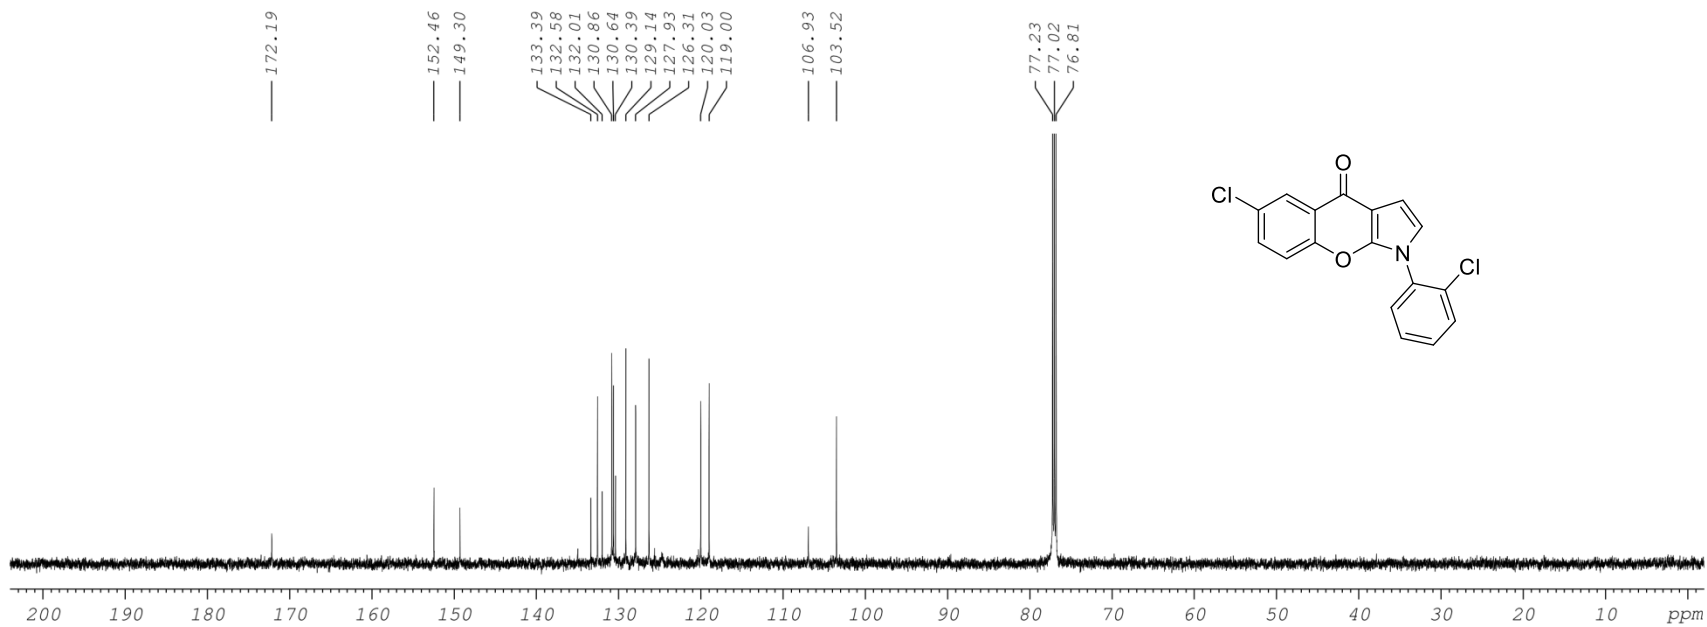

Figure S52.  $^{13}\text{C}$  NMR (150 MHz,  $\text{CDCl}_3$ ) spectra of compound **3n**

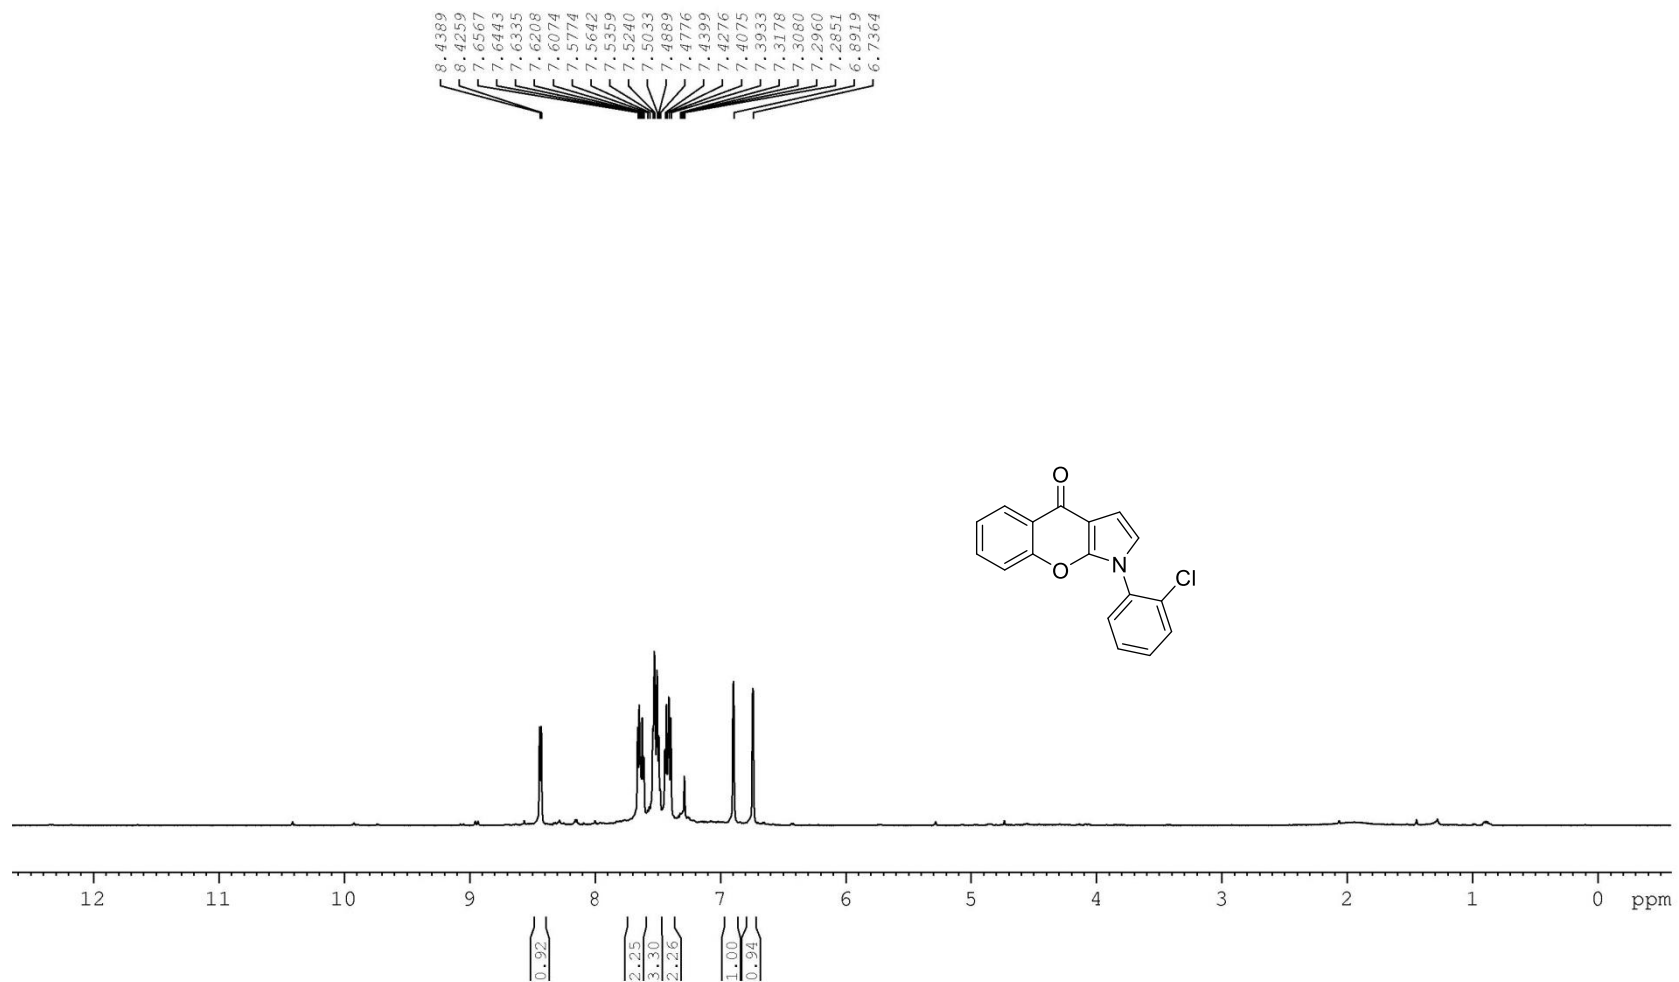

**Figure S53.**  $^1\text{H}$  NMR (600 MHz,  $\text{CDCl}_3$ ) spectra of compound **3o**

DEPT135

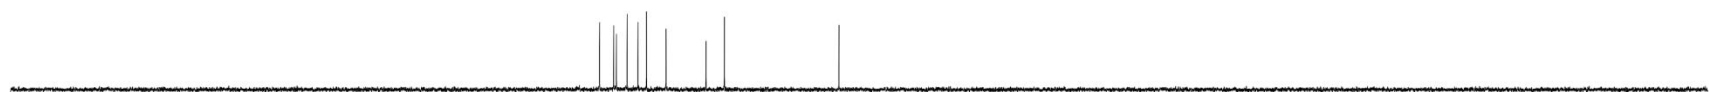

YUNNAN UNIVERSITY ASCEND AVIIIHD600 CLF-20-2  
Aug09-2021-chenli  
C13CPD CDC13

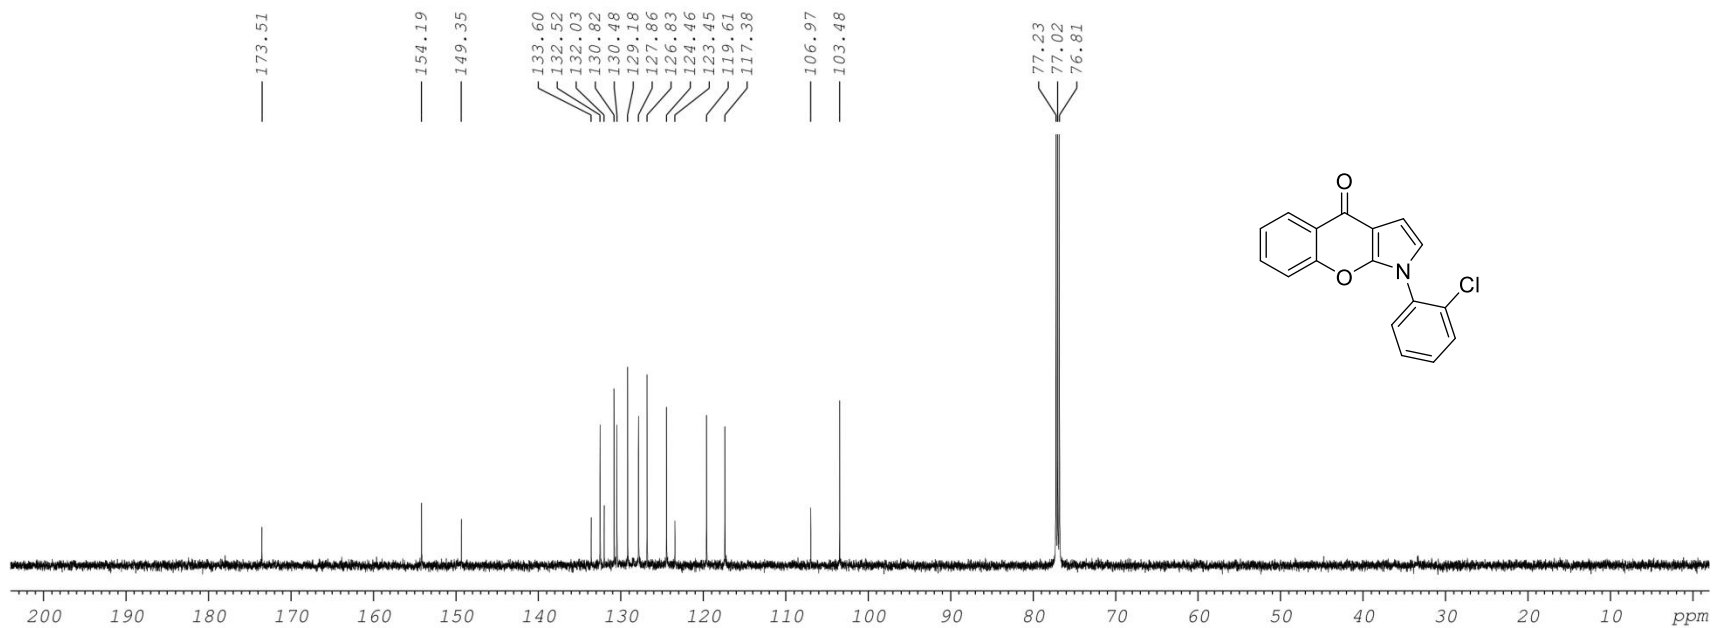

Figure S54.  $^{13}\text{C}$  NMR (150 MHz,  $\text{CDCl}_3$ ) spectra of compound **3o**

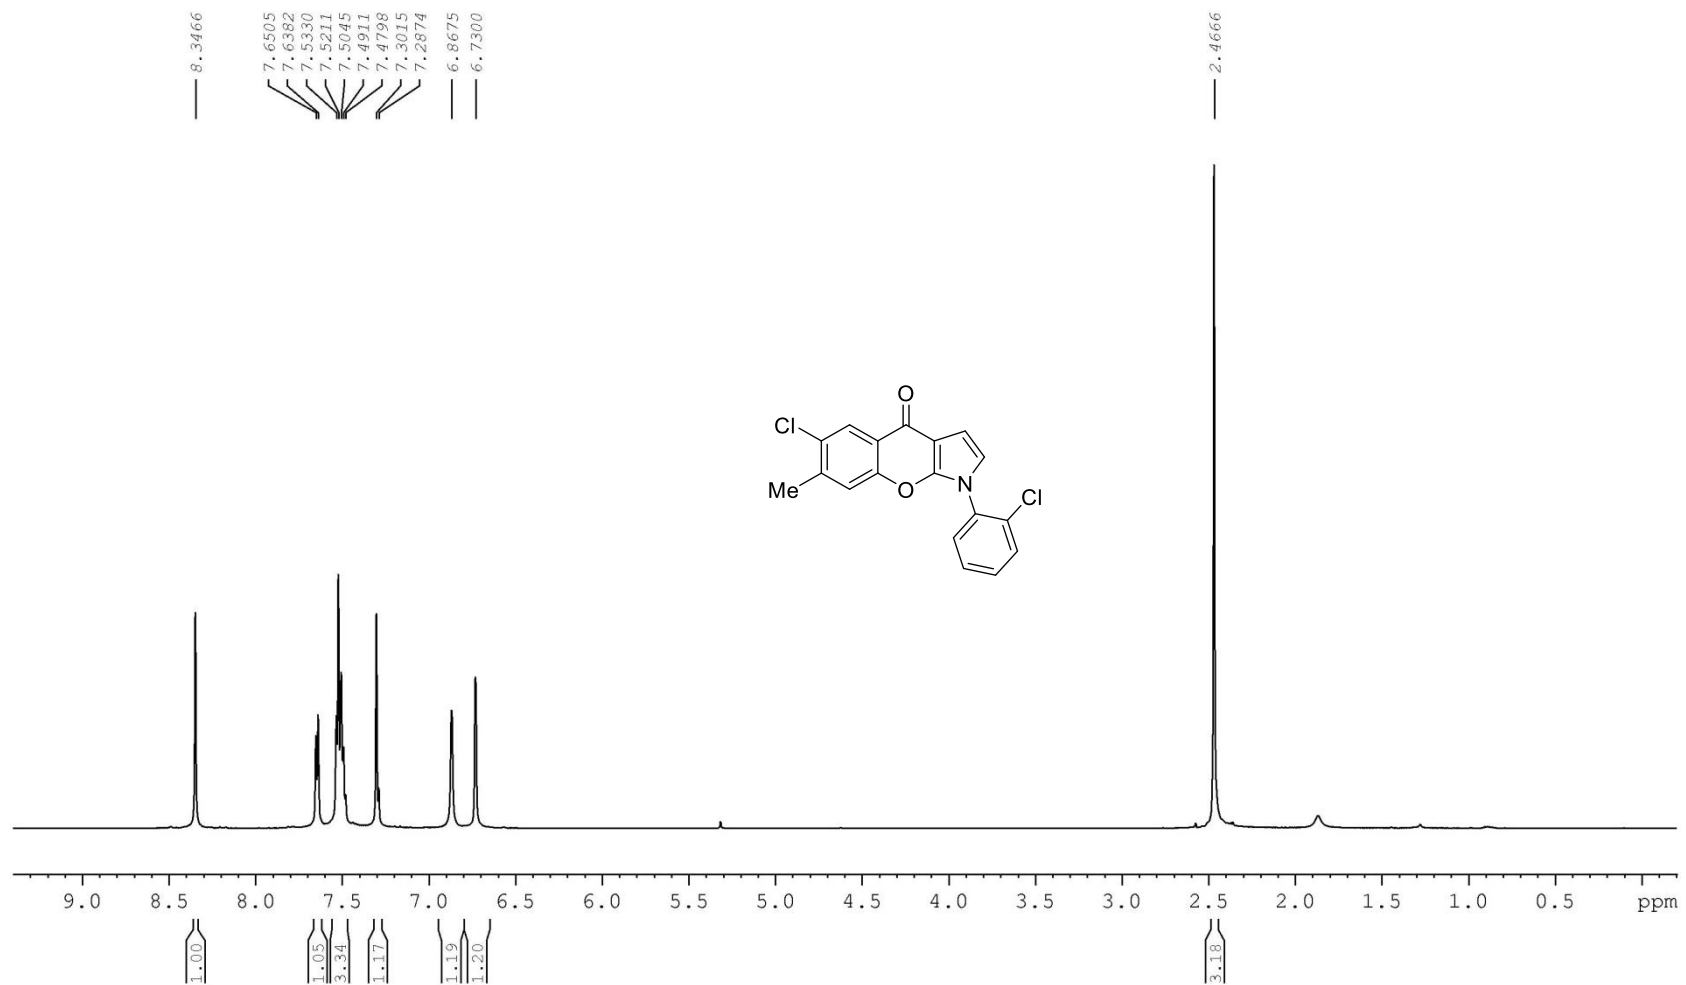

Figure S55.  $^1\text{H}$  NMR (600 MHz,  $\text{CDCl}_3$ ) spectra of compound **3p**



DEPT135

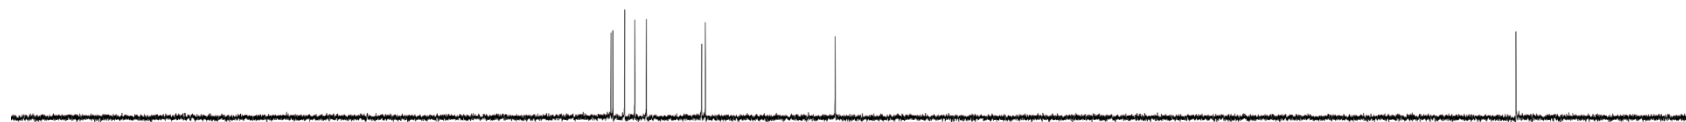

YUNNAN UNIVERSITY ASCEND AVIIIHD600 CLF-16-2  
Aug09-2021-chenli  
C13CPD CDCl3

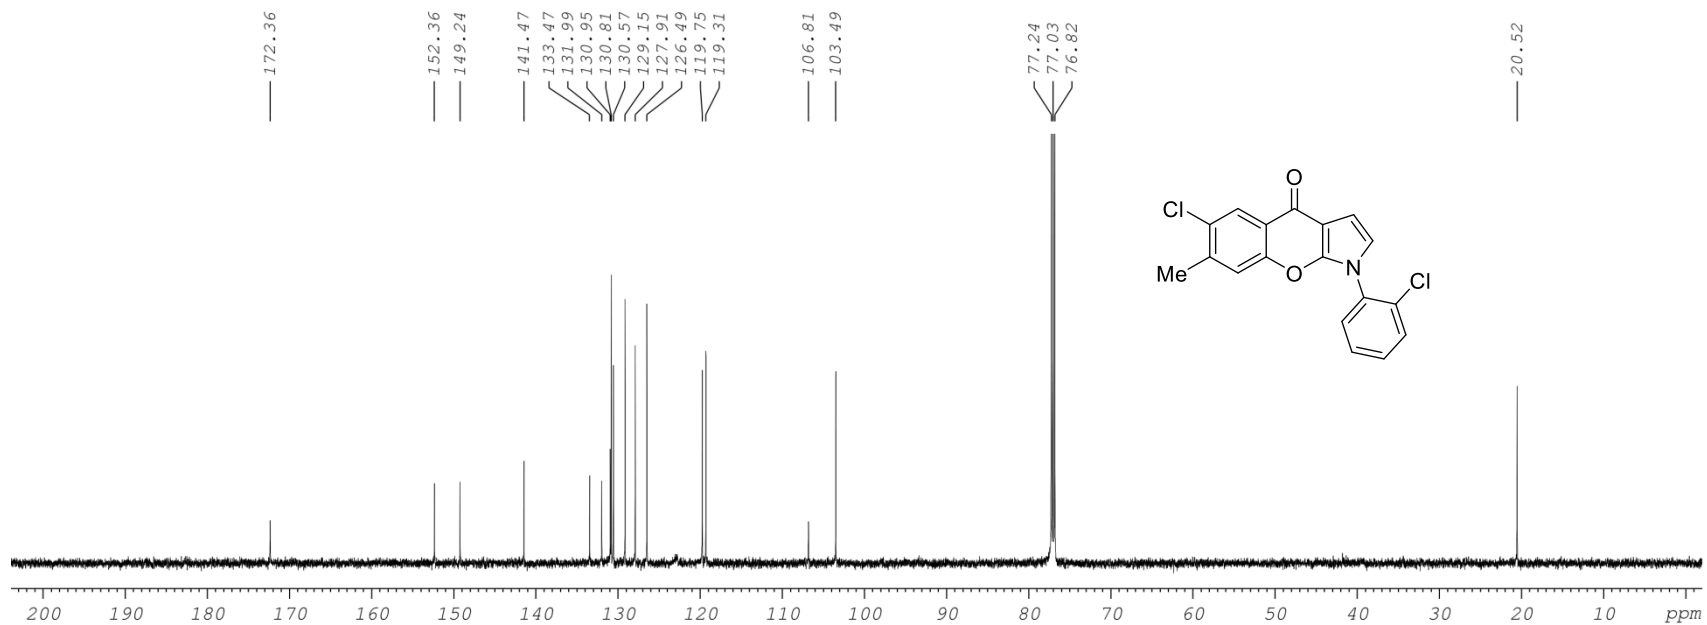

Figure S56.  $^{13}\text{C}$  NMR (150 MHz,  $\text{CDCl}_3$ ) spectra of compound 3p

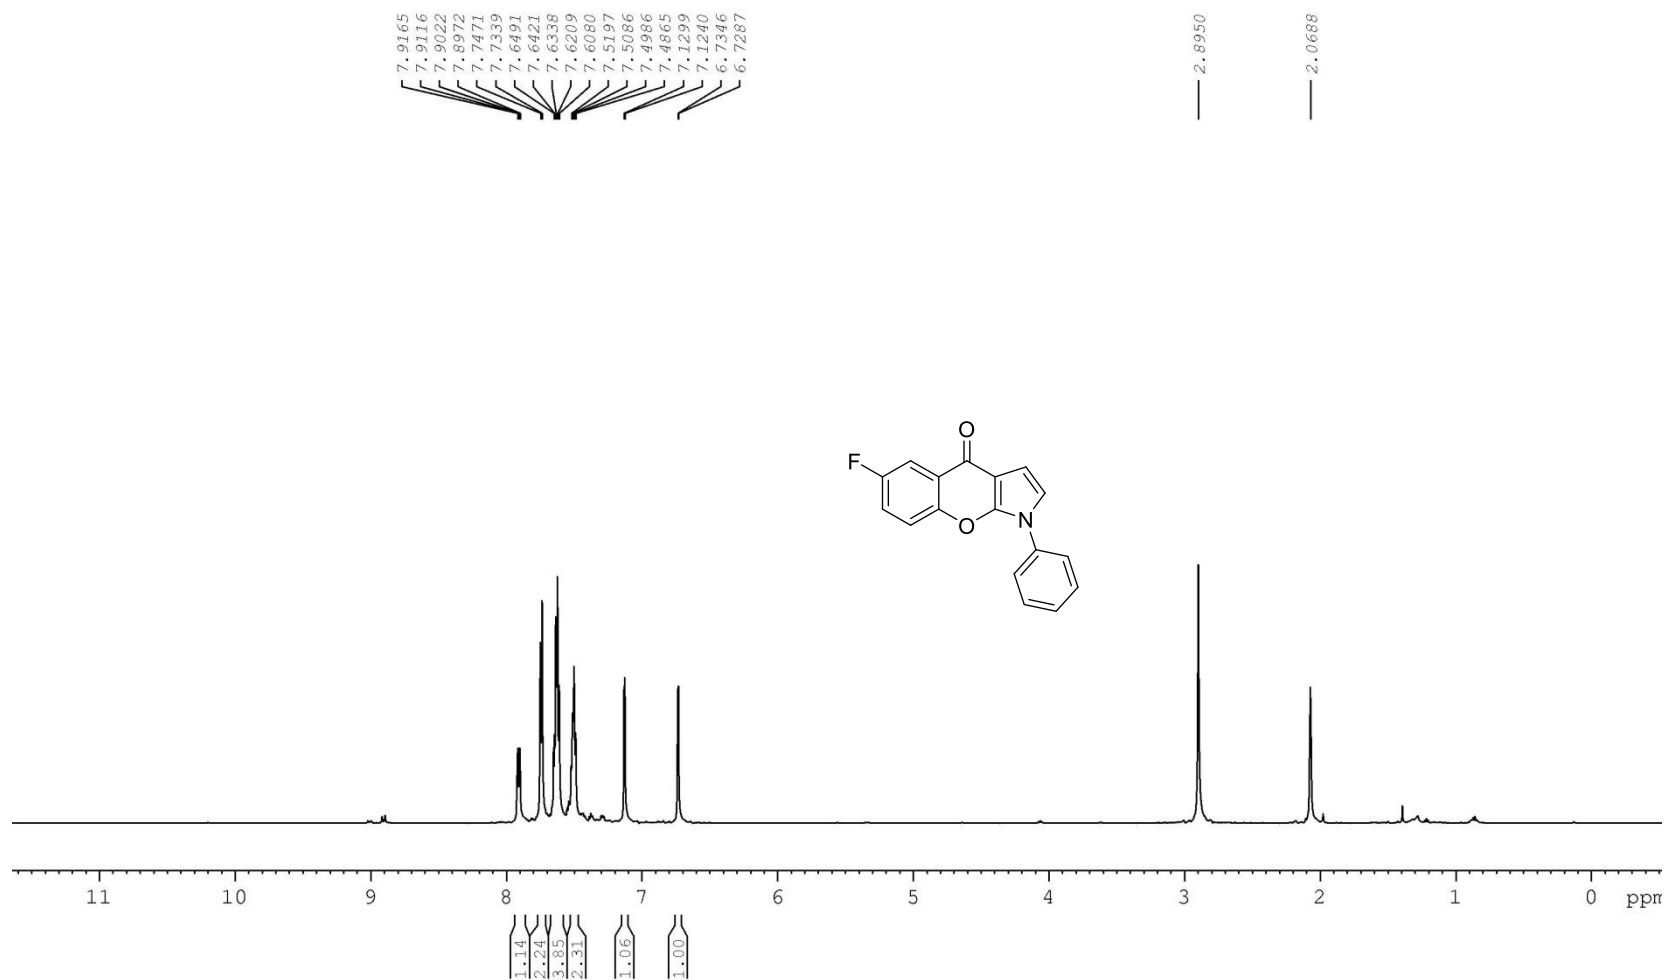

**Figure S57.**  $^1\text{H}$  NMR (600 MHz,  $\text{CDCl}_3 + \text{Acetone-}d_6$ ) spectra of compound **3q**

DEPT135

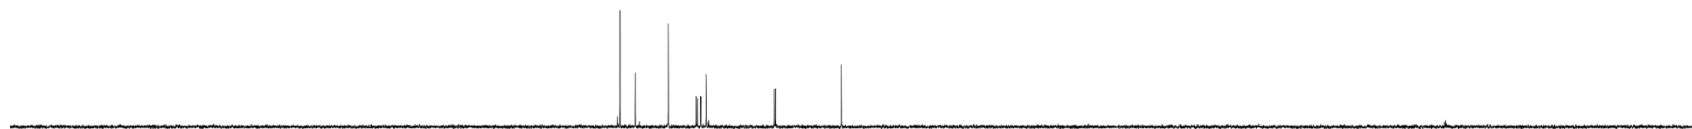

YUNNAN UNIVERSITY ASCEND AVIIIHD600 CLF-02-2  
Jul07-2021-chenli  
C13CPD Acetone

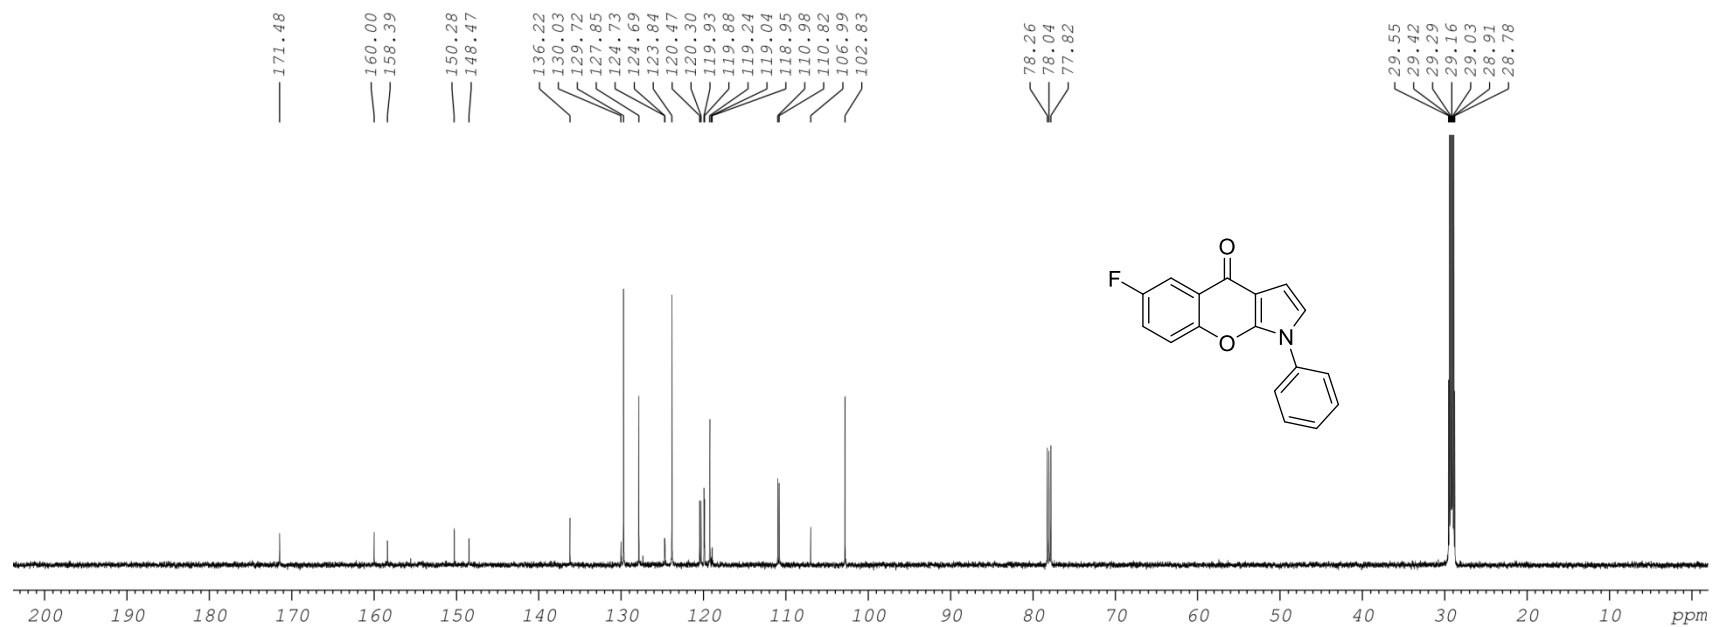

Figure S58.  $^{13}\text{C}$  NMR (150 MHz,  $\text{CDCl}_3 + \text{Acetone-}d_6$ ) spectra of compound **3q**

YUNNAN UNIVERSITY ASCEND AVIIIHD600 CLF-02-2  
Jul07-2021-chenli  
F19CPD Acetone

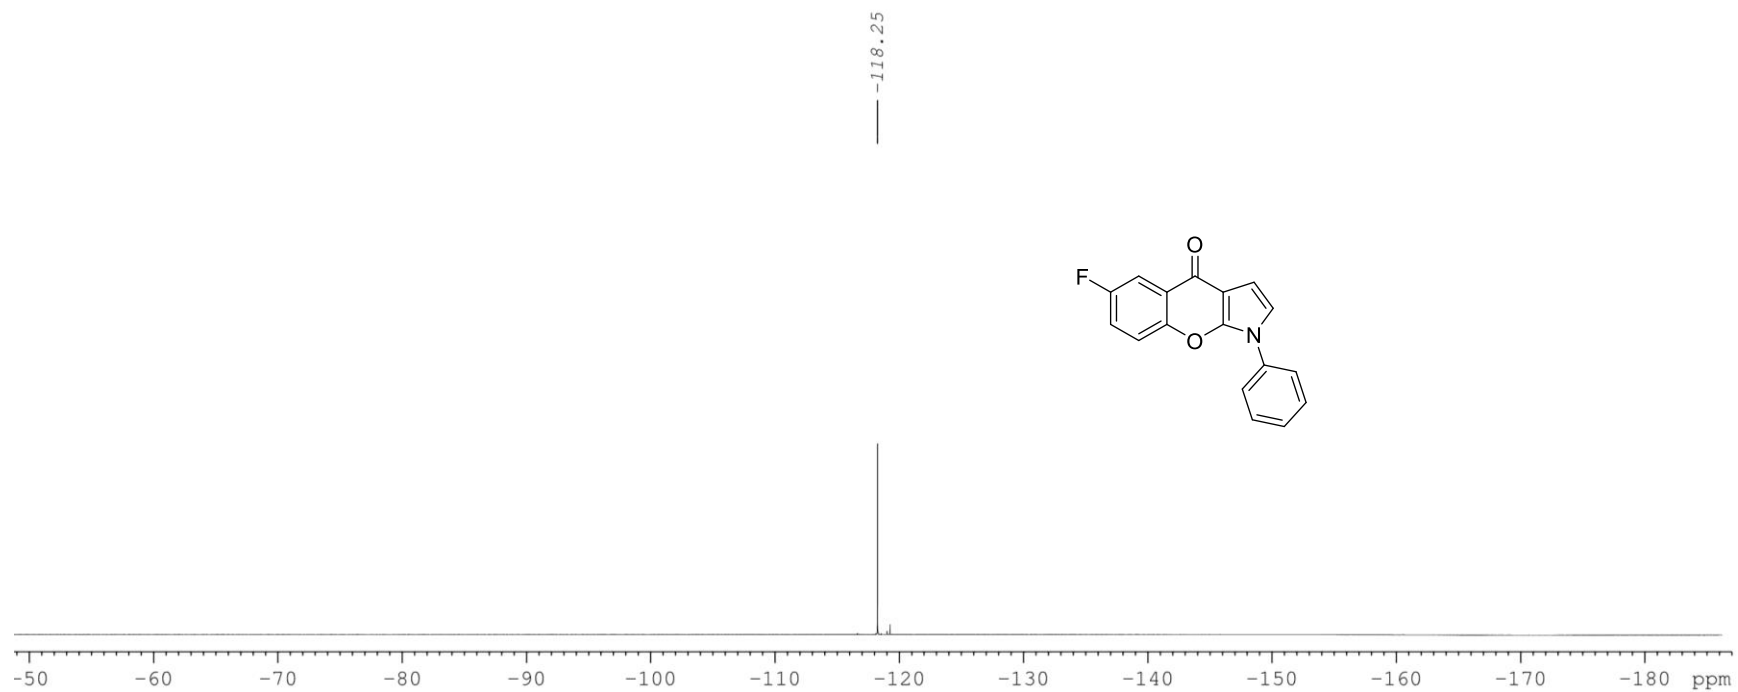

**Figure S59.**  $^{19}\text{F}$  NMR (564 MHz,  $\text{CDCl}_3 + \text{Acetone-}d_6$ ) spectra of compound **3q**

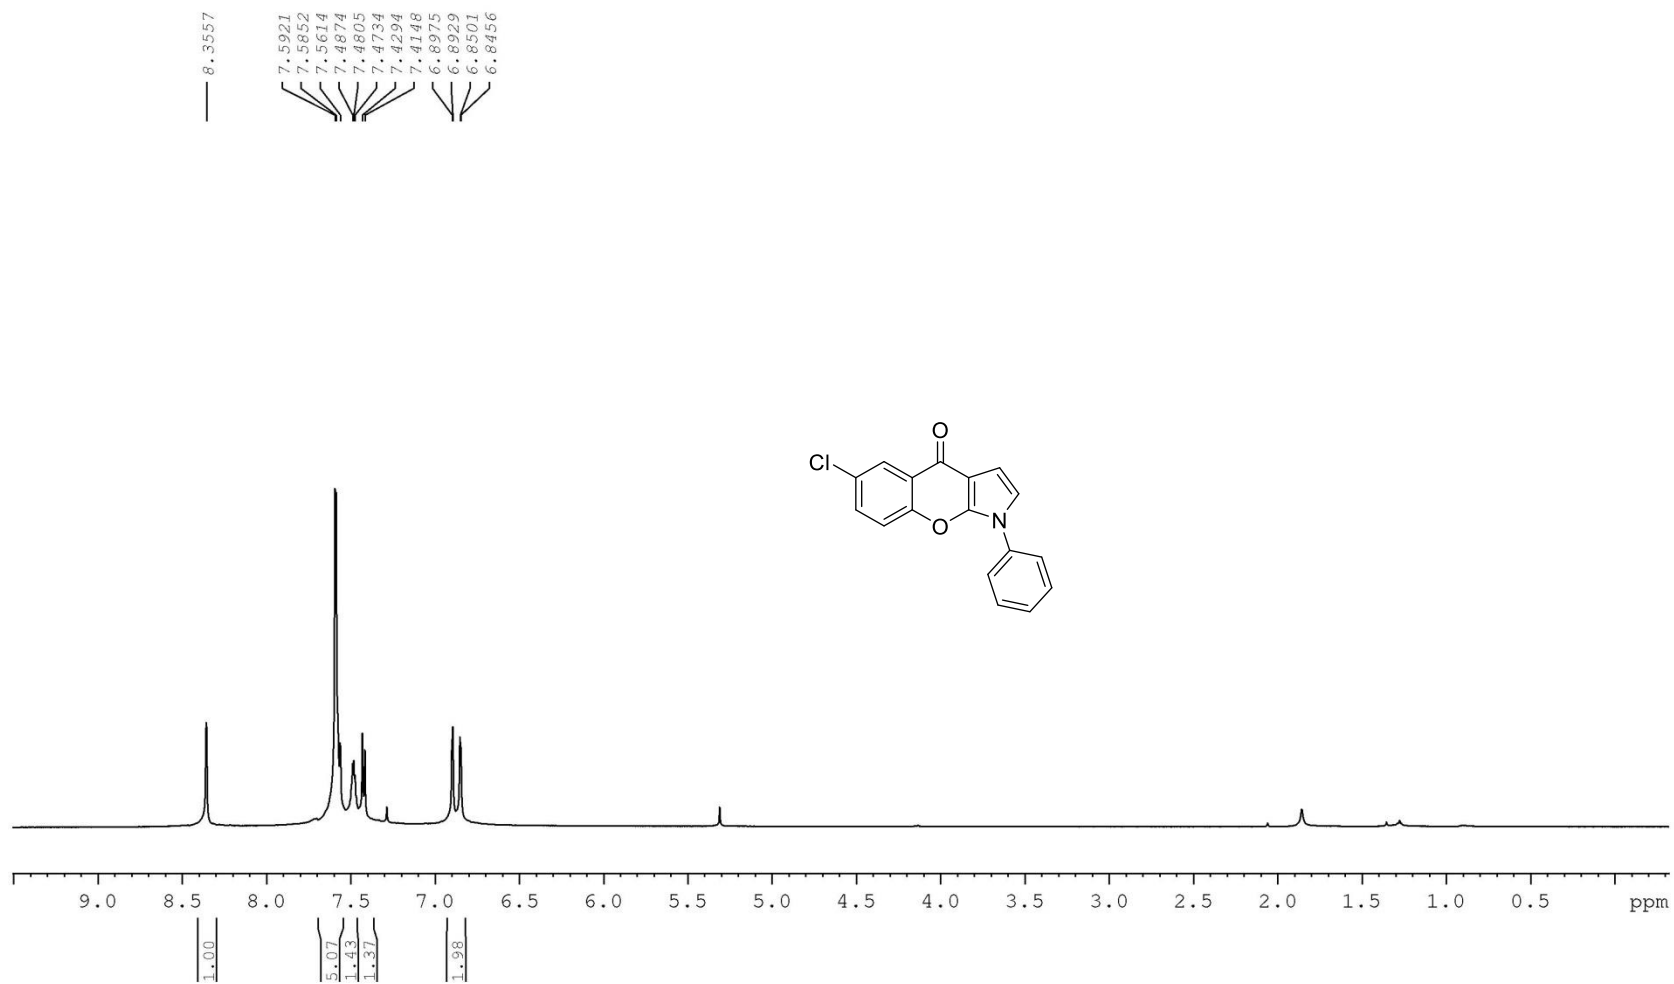

**Figure S60.** <sup>1</sup>H NMR (600 MHz, CDCl<sub>3</sub>) spectra of compound **3r**

DEPT135

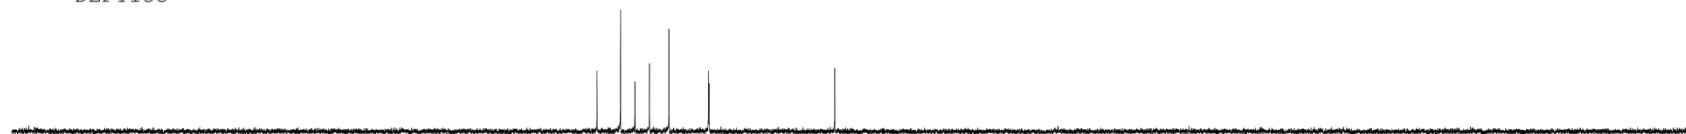

YUNNAN UNIVERSITY ASCEND AVIIIHD600 CLF-03-2  
Jul13-2021-chenli  
C13CPD CDC13

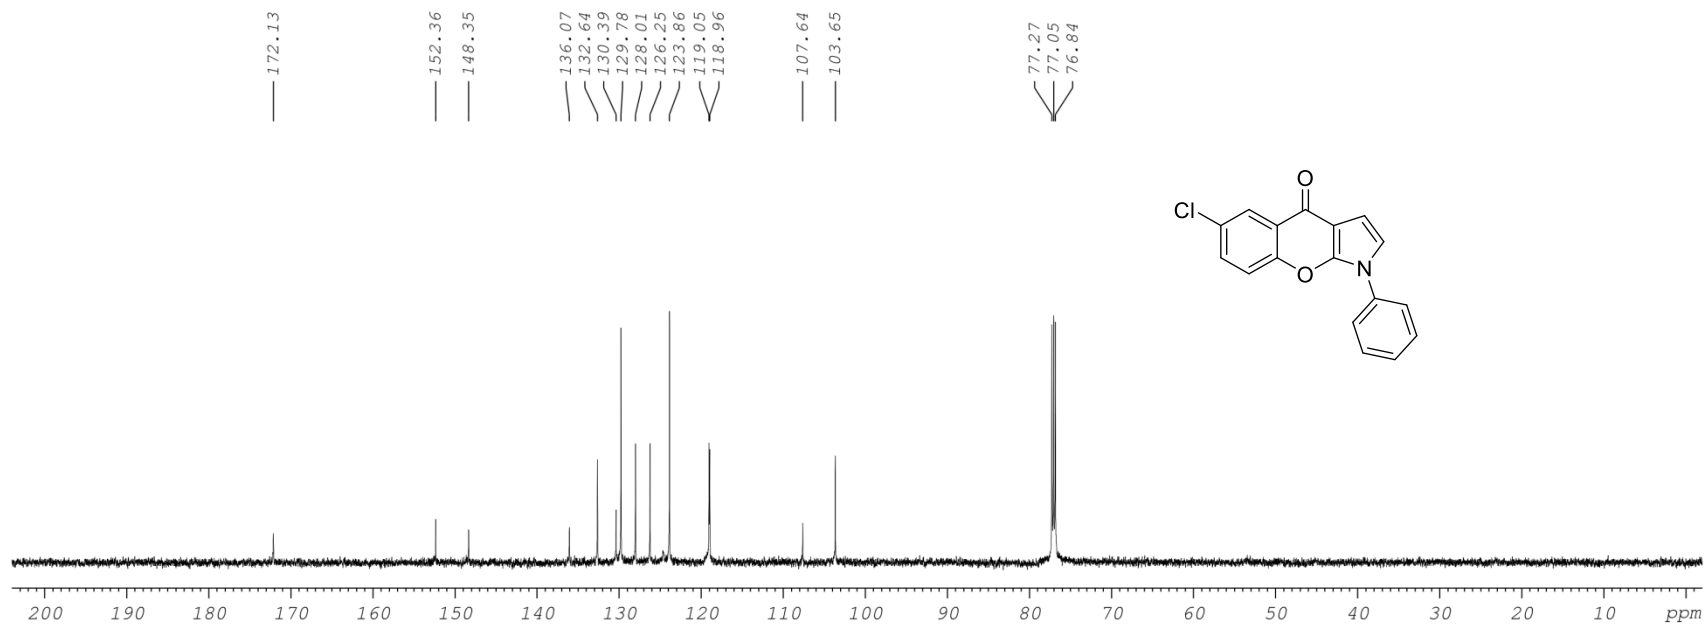

Figure S61.  $^{13}\text{C}$  NMR (150 MHz,  $\text{CDCl}_3$ ) spectra of compound 3r

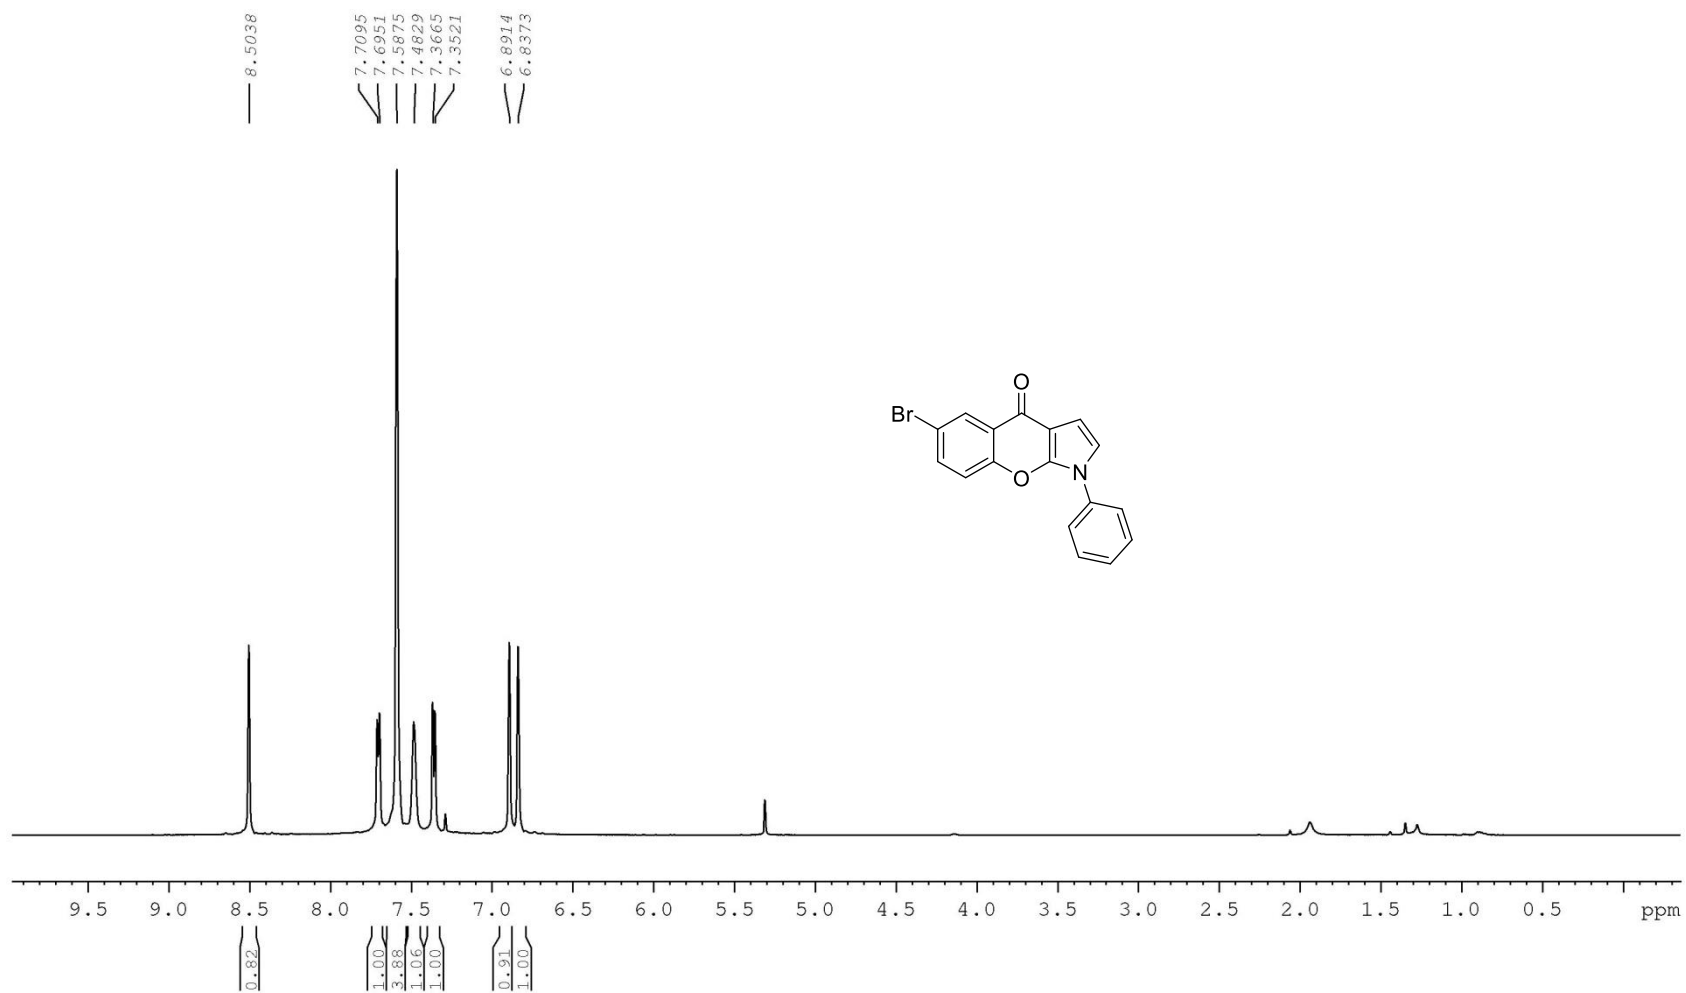

**Figure S62.**  $^1\text{H}$  NMR (600 MHz,  $\text{CDCl}_3$ ) spectra of compound **3s**

DEPT135

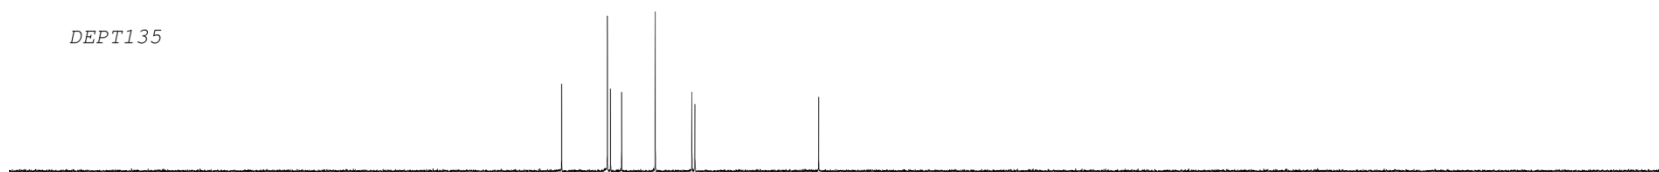

YUNNAN UNIVERSITY ASCEND AVIIIHD600 CLF-05-2  
Jul13-2021-chenli  
C13CPD CDC13

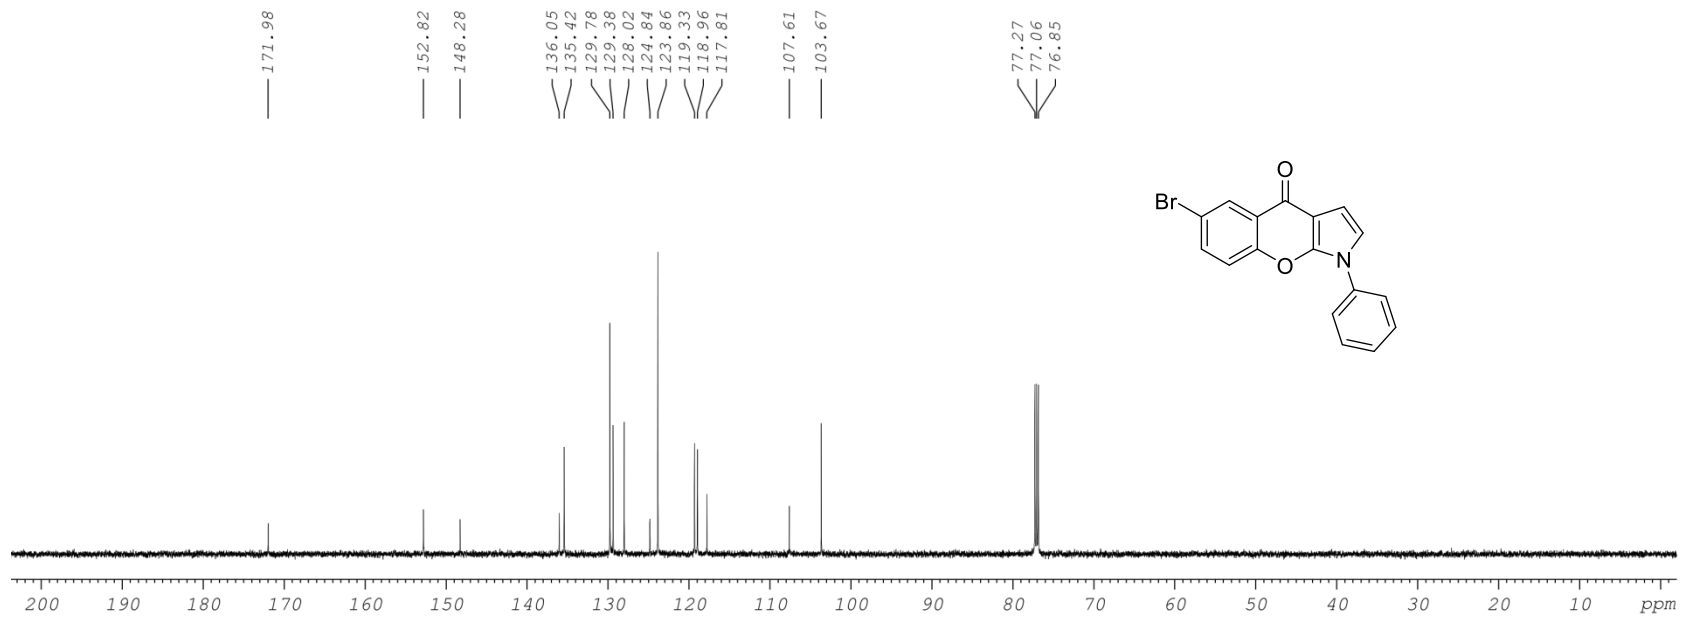

Figure S63.  $^{13}\text{C}$  NMR (150 MHz,  $\text{CDCl}_3$ ) spectra of compound 3s



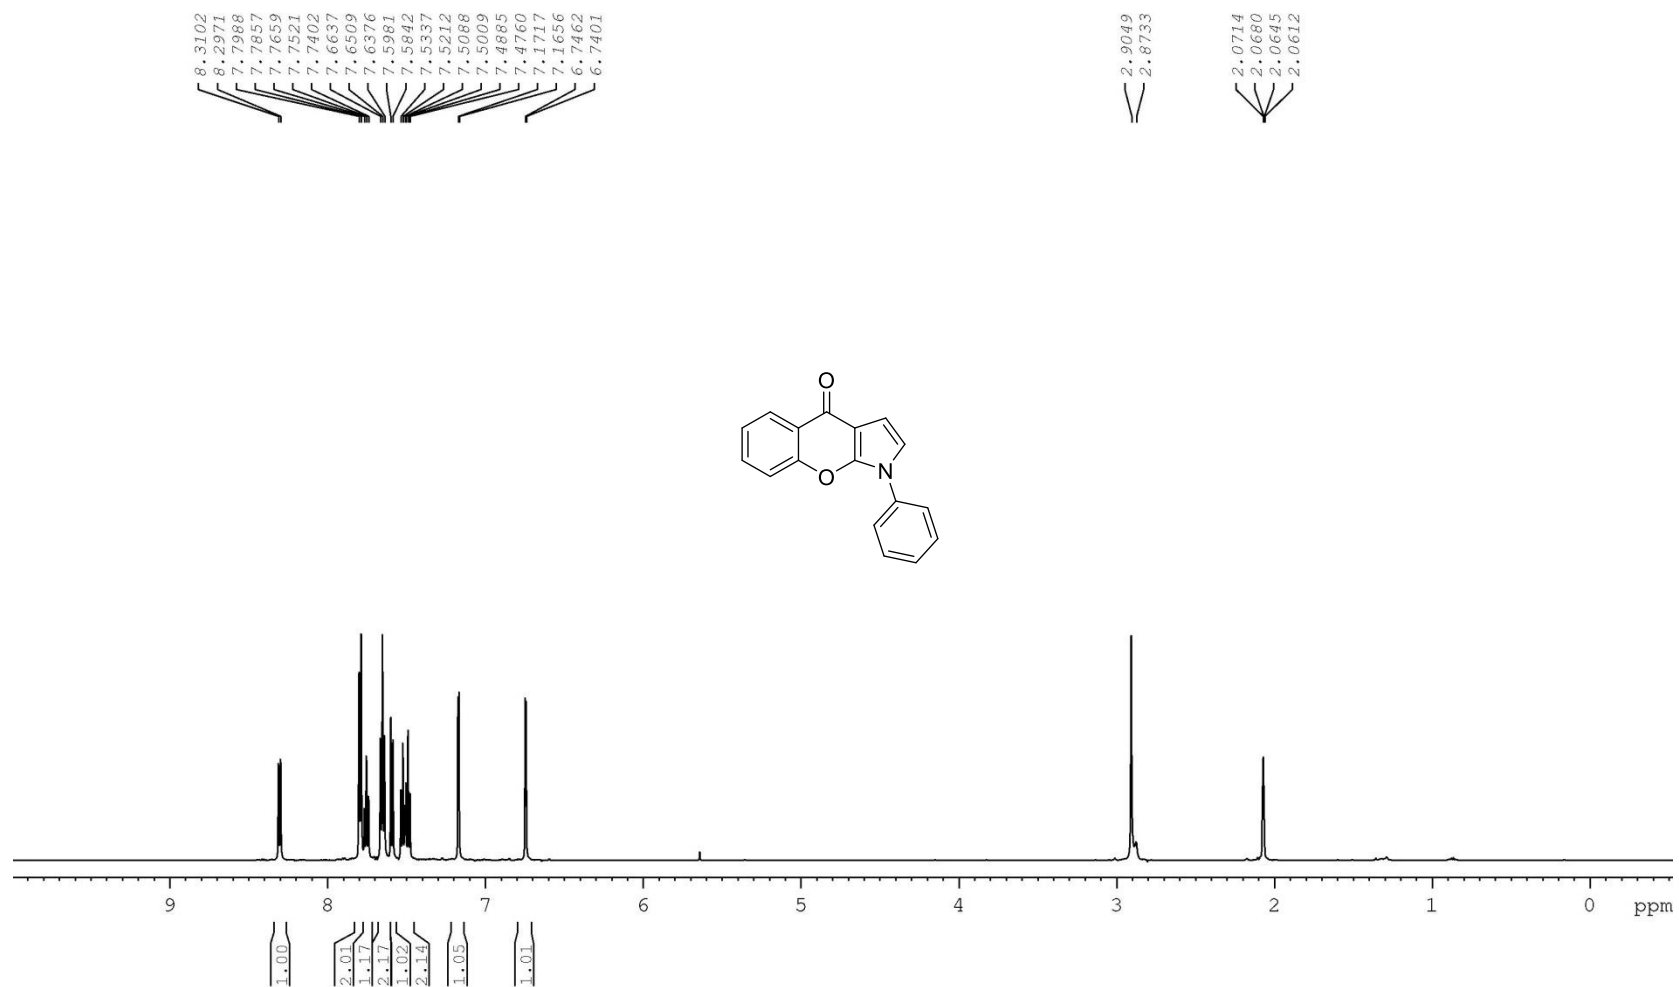

**Figure S64.** <sup>1</sup>H NMR (600 MHz, Acetone-*d*<sub>6</sub>) spectra of compound 3t

DEPT135

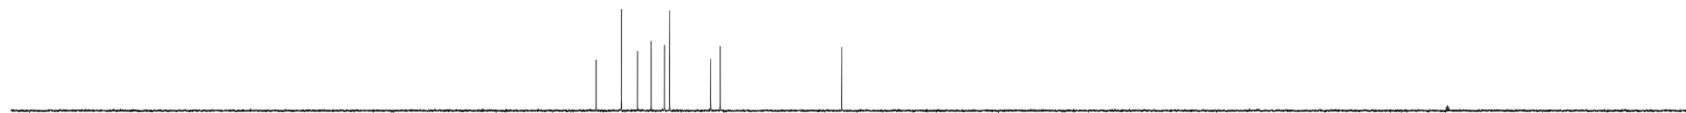

YUNNAN UNIVERSITY ASCEND AVIIIHD600 CLF-01-2  
Jul05-2021-chenli  
C13CPD Acetone

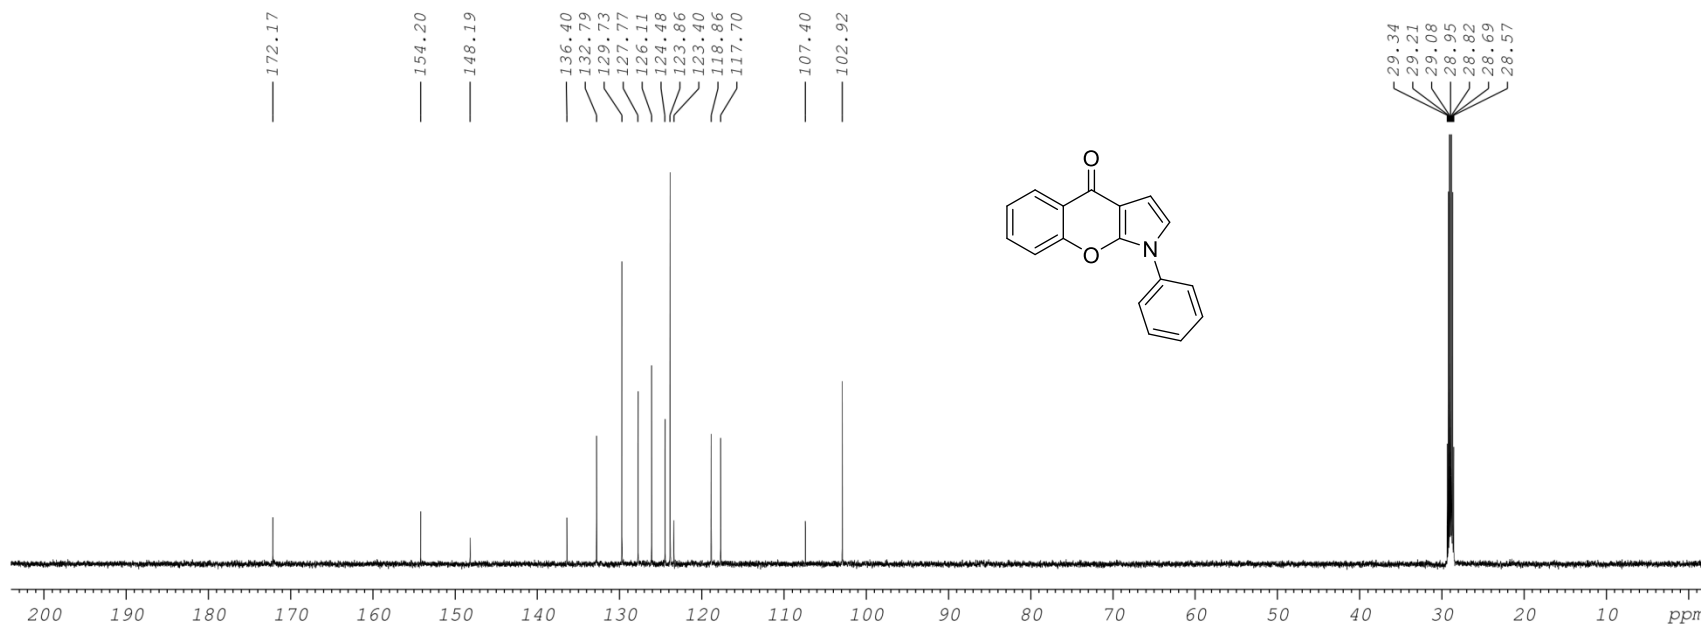

Figure S65.  $^{13}\text{C}$  NMR (150 MHz, Acetone- $d_6$ ) spectra of compound 3t

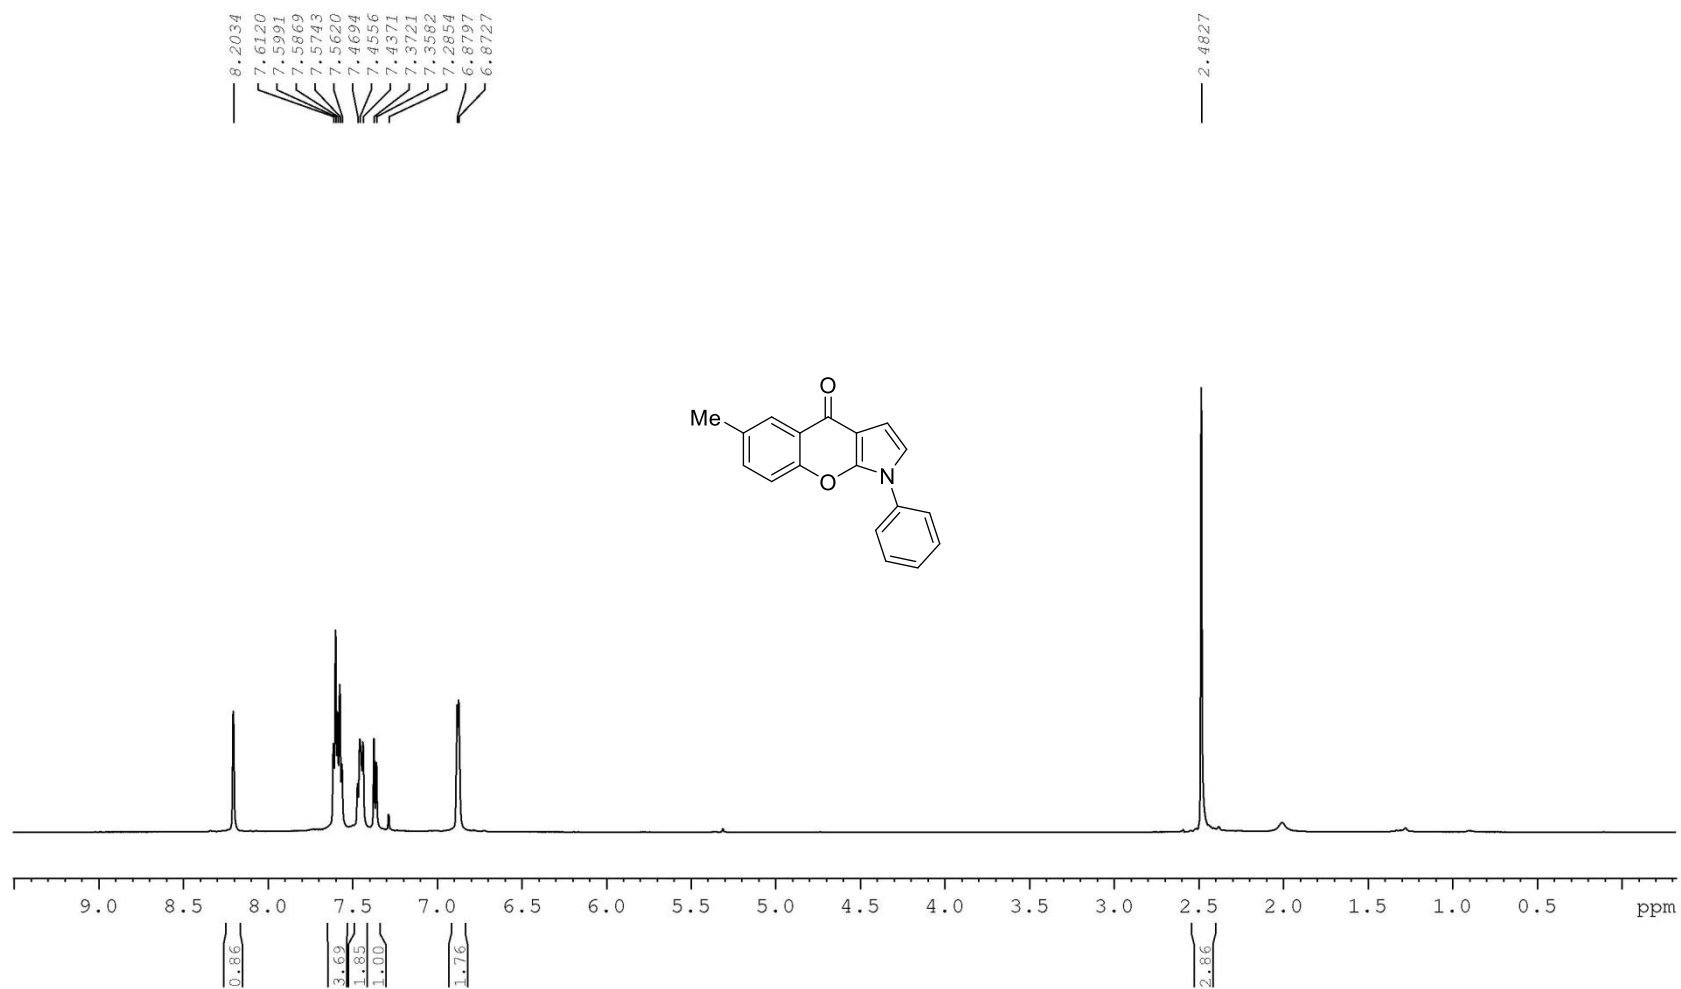

**Figure S66.**  $^1\text{H}$  NMR (600 MHz,  $\text{CDCl}_3$ ) spectra of compound **3u**

DEPT135

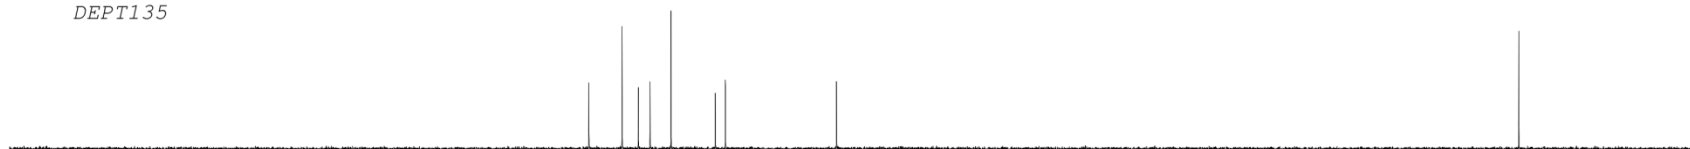

YUNNAN UNIVERSITY ASCEND AVIIIHD600 CLF-04-2  
Jul13-2021-chenli  
C13CPD CDC13

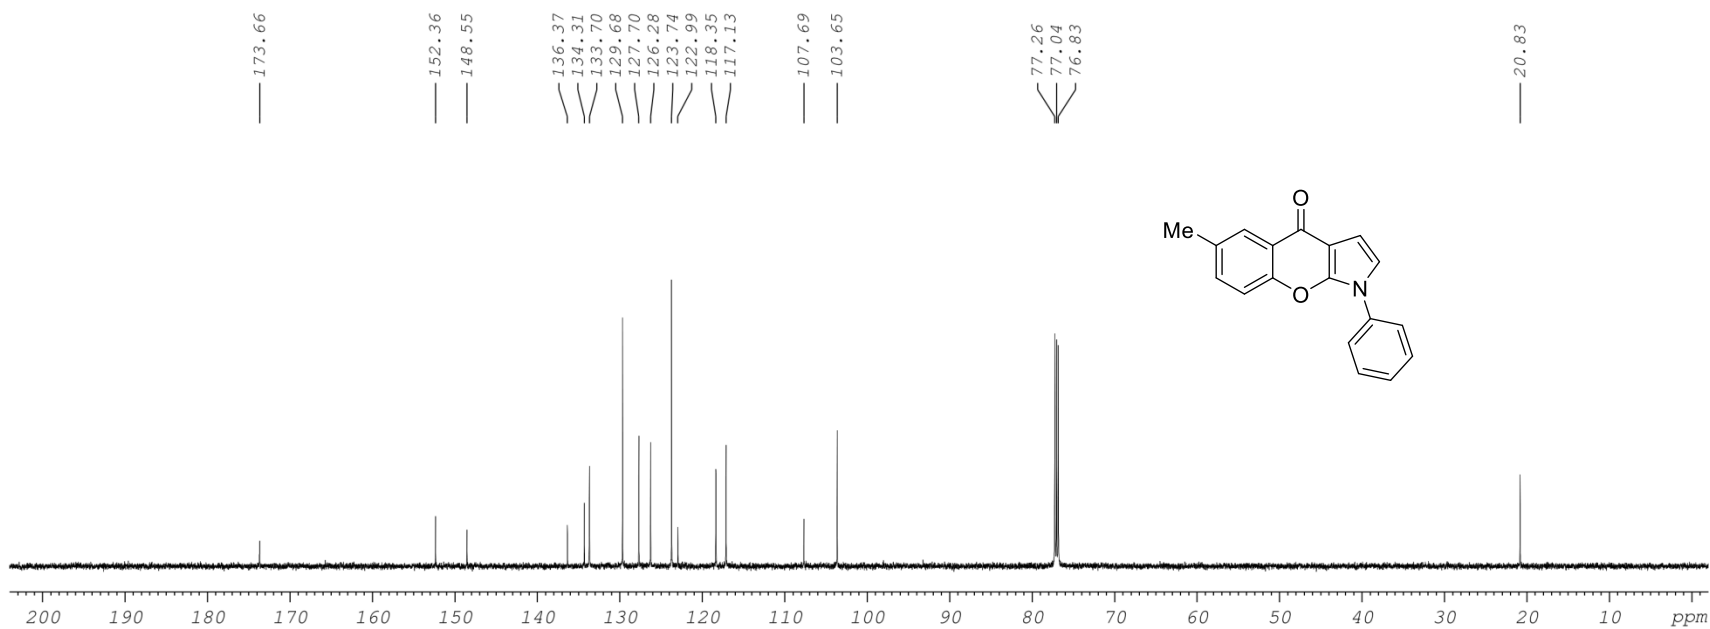

Figure S67.  $^{13}\text{C}$  NMR (150 MHz,  $\text{CDCl}_3$ ) spectra of compound 3u

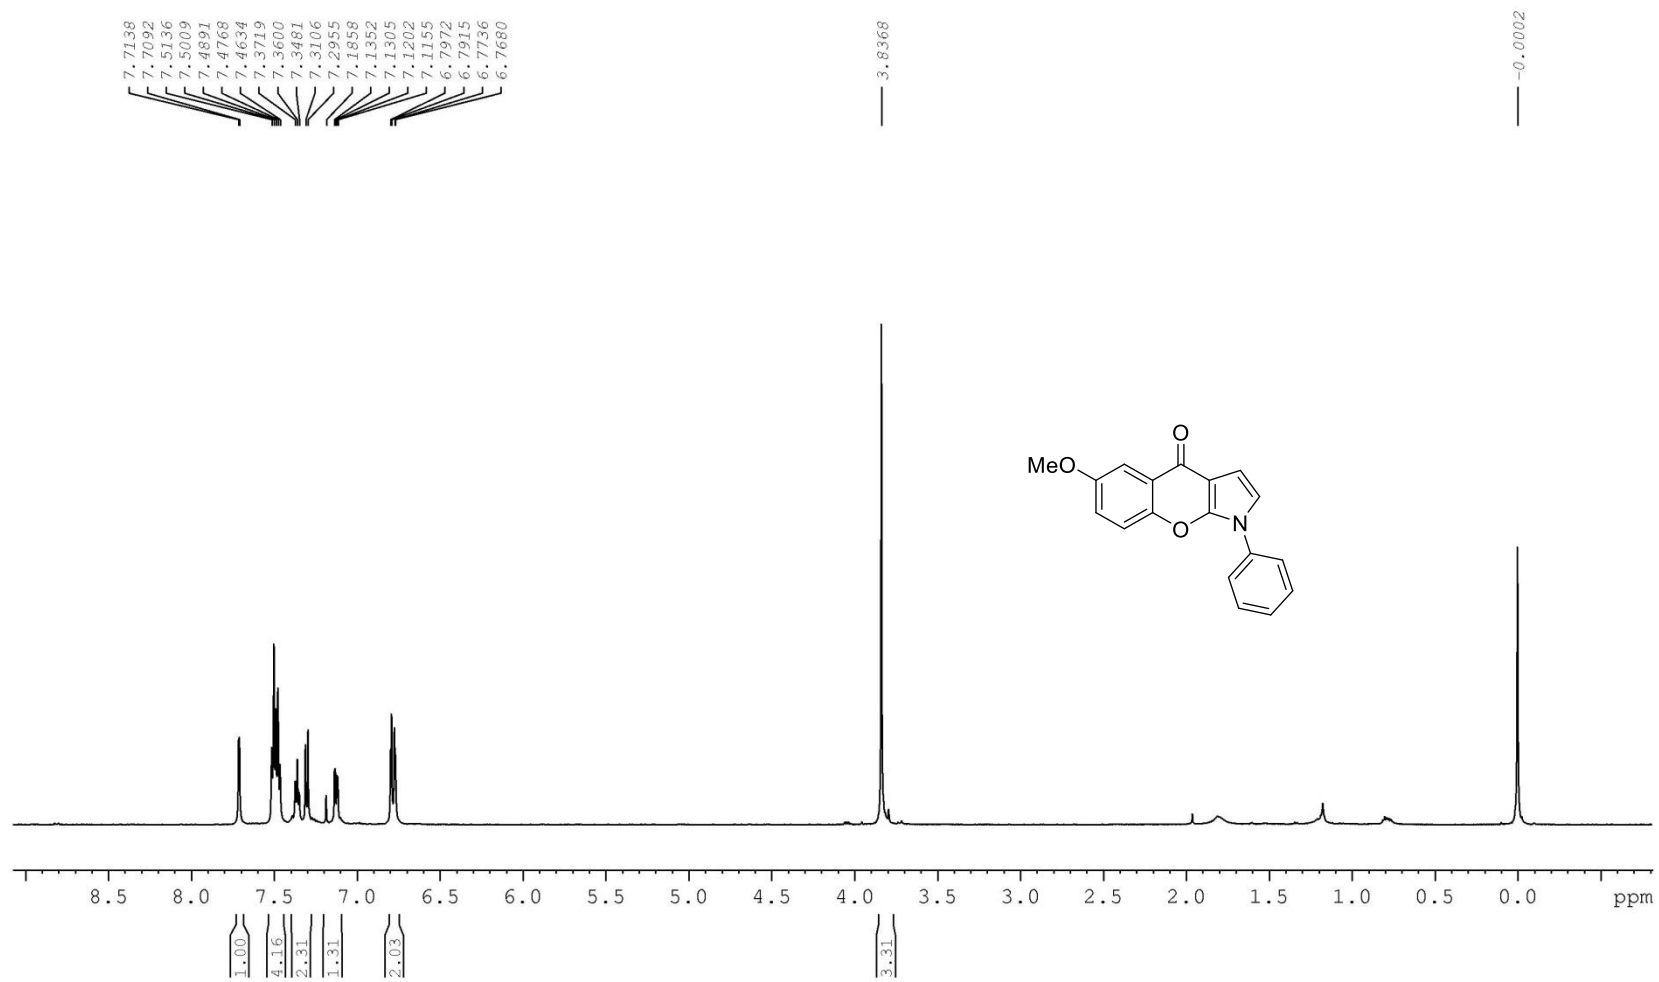

Figure S68.  $^1\text{H}$  NMR (600 MHz,  $\text{CDCl}_3$ ) spectra of compound **3v**

DEPT135

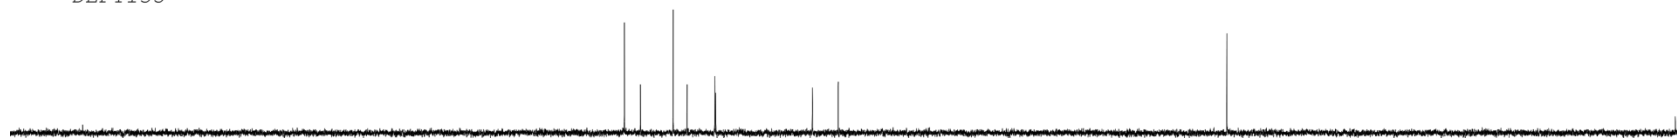

YUNNAN UNIVERSITY ASCEND AVIIIHD600 CLF-15  
Aug16-2021-chenli  
C13CPD CDC13

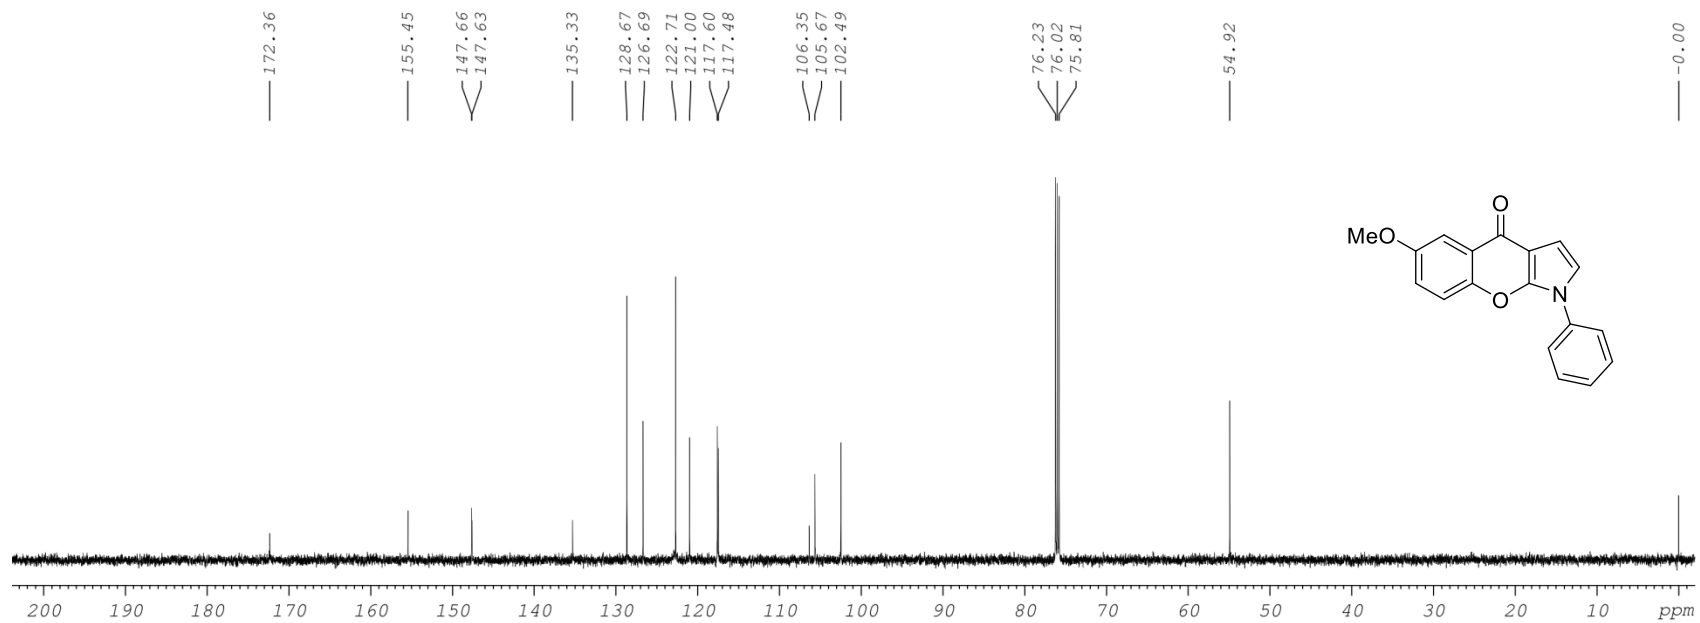

Figure S69.  $^{13}\text{C}$  NMR (150 MHz,  $\text{CDCl}_3$ ) spectra of compound **3v**

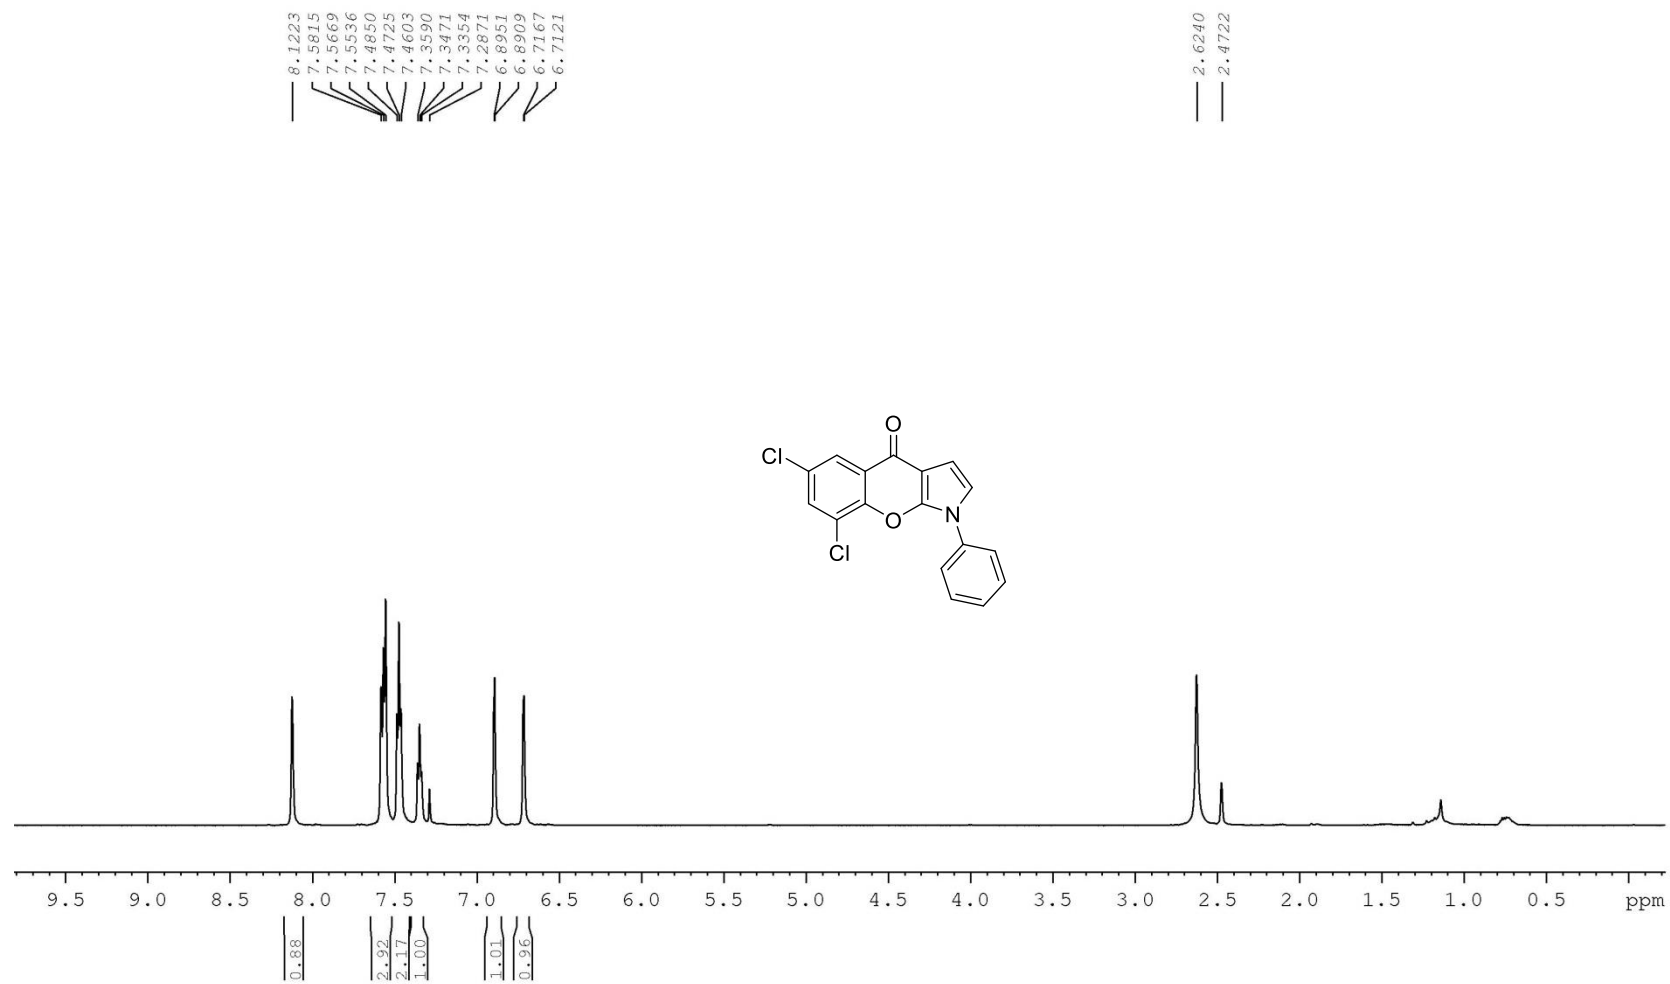

**Figure S70.** <sup>1</sup>H NMR (600 MHz, CDCl<sub>3</sub>+DMSO-*d*<sub>6</sub>) spectra of compound **3w**

DEPT135

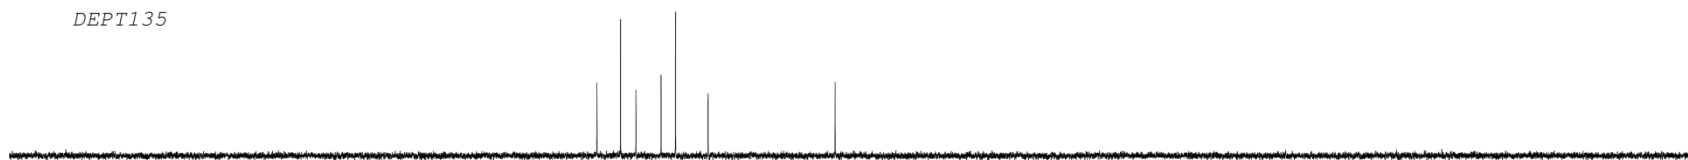

YUNNAN UNIVERSITY ASCEND AVIIIHD600 CLF-08-2  
Jul13-2021-chenli  
C13CPD CDC13

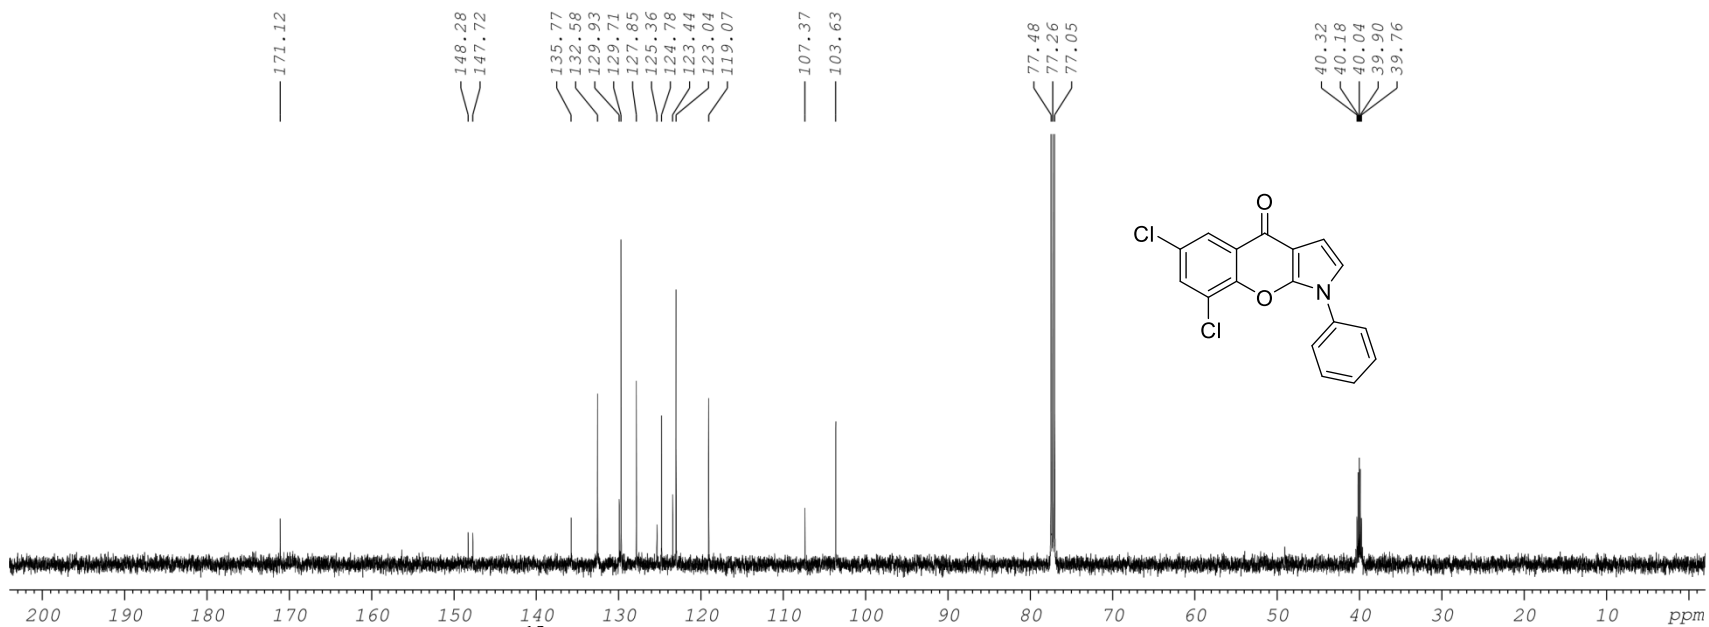

Figure S71.  $^{13}\text{C}$  NMR (150 MHz,  $\text{CDCl}_3+\text{DMSO}-d_6$ ) spectra of compound 3w



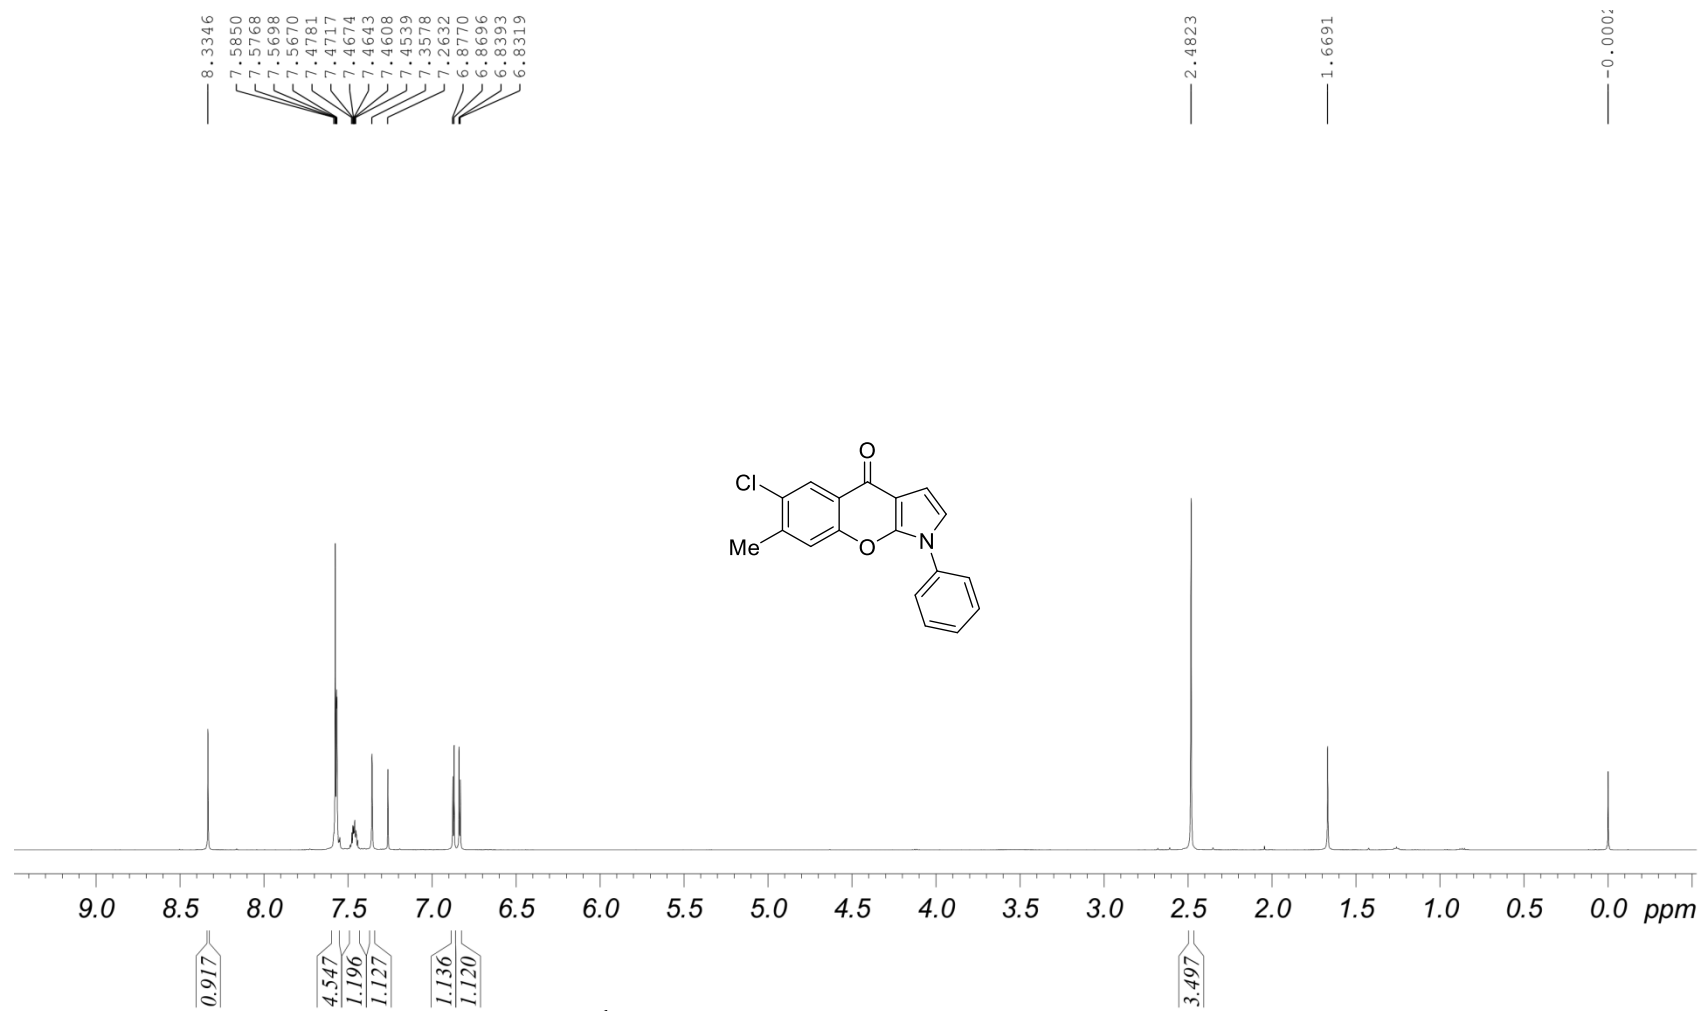

**Figure S72.**  $^1\text{H}$  NMR (500 MHz,  $\text{CDCl}_3$ ) spectra of compound **3x**

DEPT135

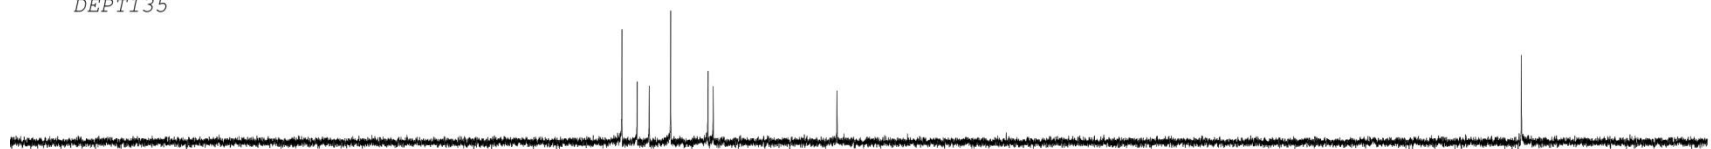

YUNNAN UNIVERSITY ASCEND AVIIIHD600 CLF-07-2  
Jul13-2021-chenli  
C13CPD CDC13

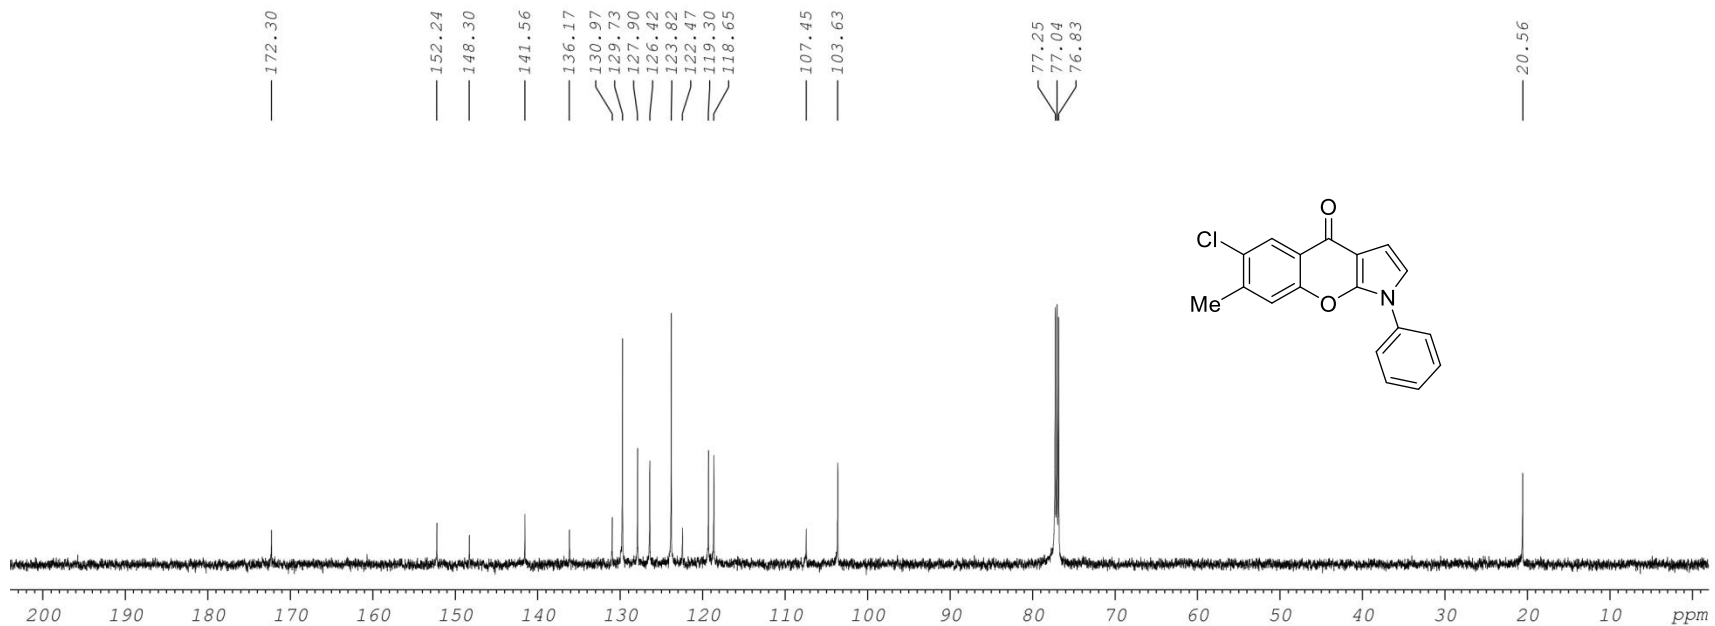

Figure S73.  $^{13}\text{C}$  NMR (150 MHz,  $\text{CDCl}_3$ ) spectra of compound **3x**

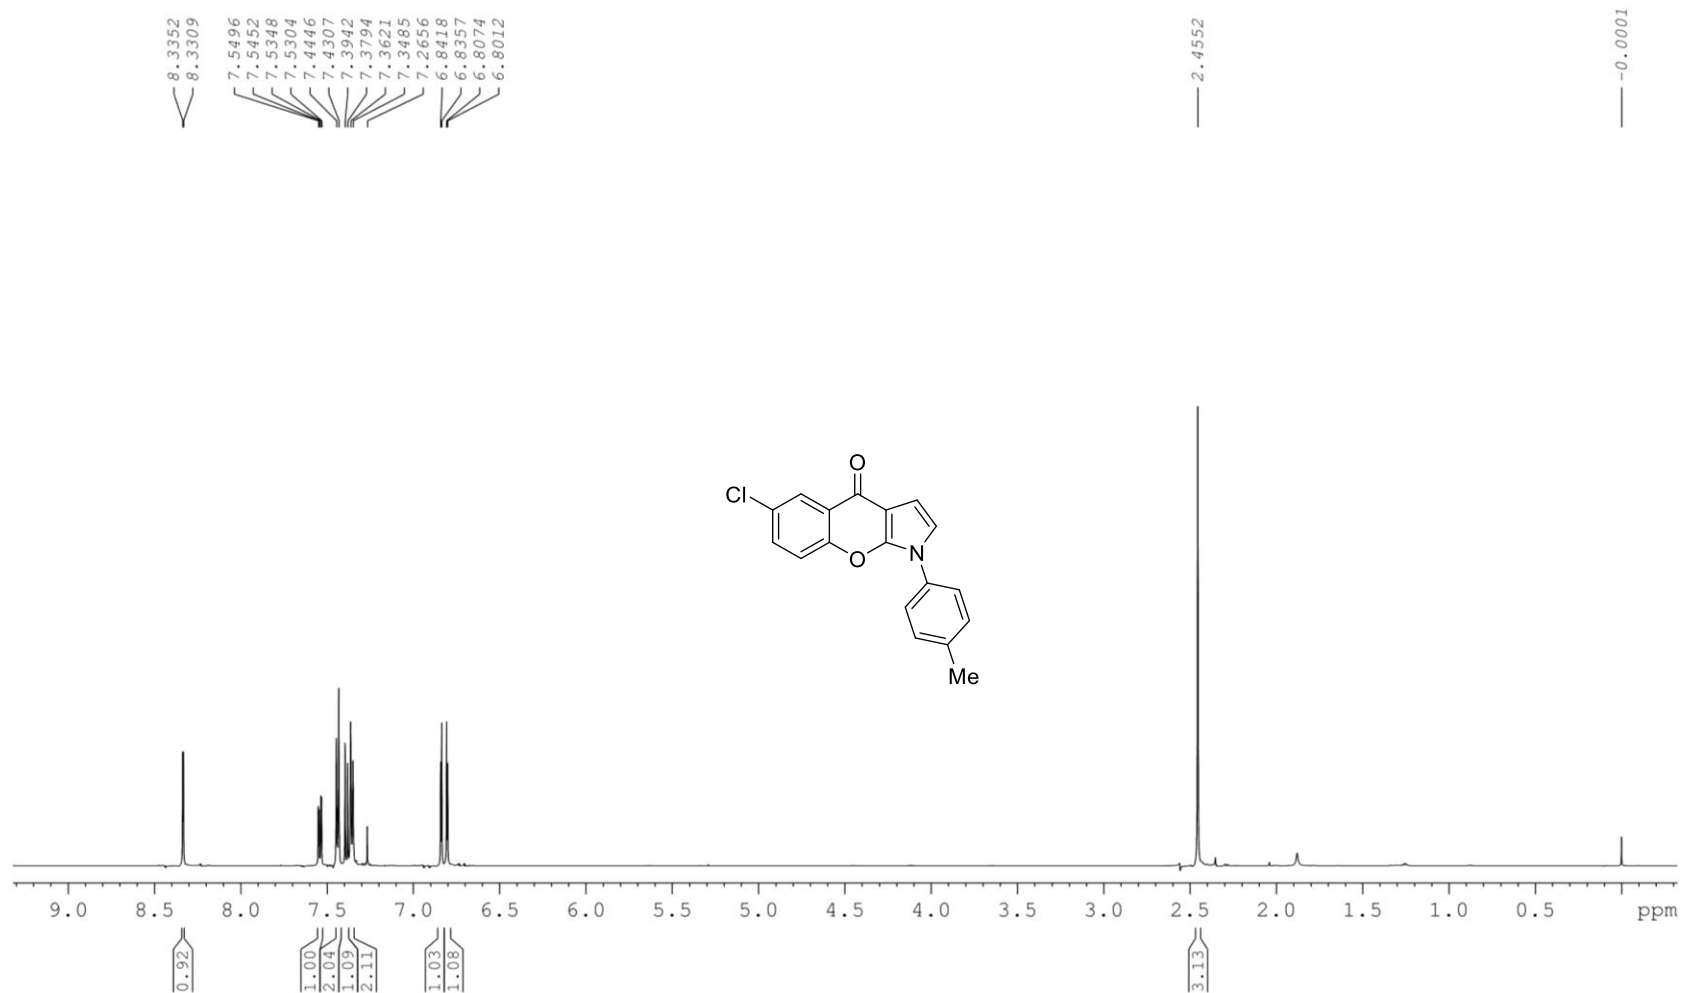

**Figure S74.** <sup>1</sup>H NMR (600 MHz, CDCl<sub>3</sub>) spectra of compound **3y**

DEPT135

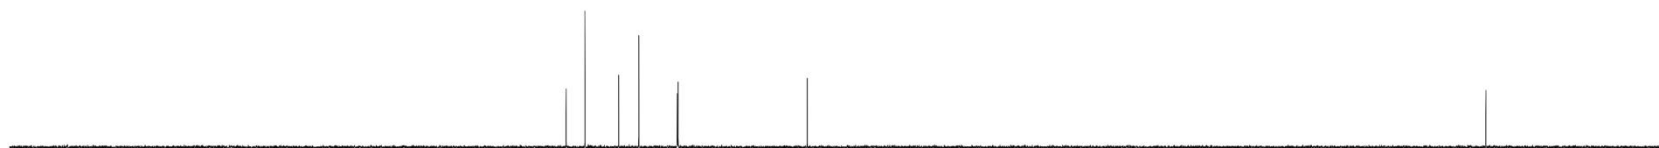

YUNNAN UNIVERSITY ASCEND AVIIIHD600 CLF-28-2  
Aug01-2022-chenli  
C13CPD CDCl3

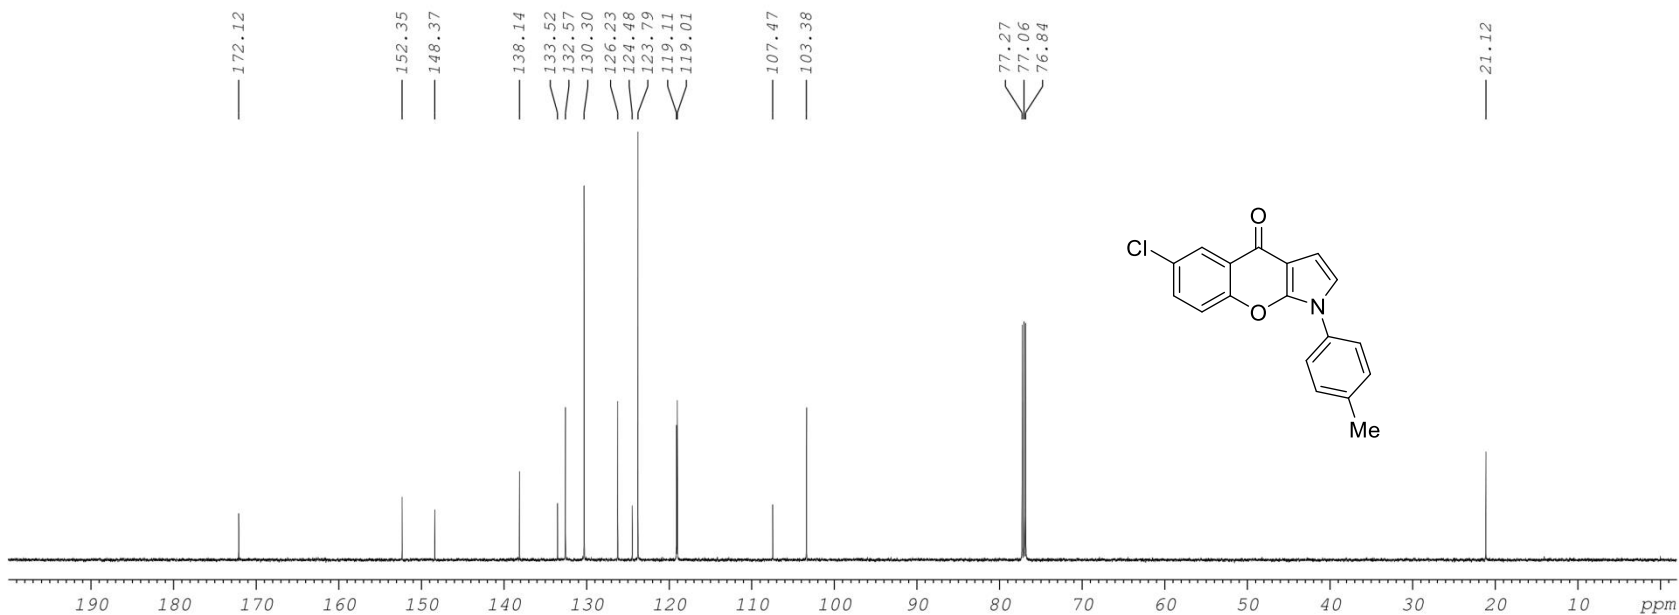

Figure S75.  $^{13}\text{C}$  NMR (150 MHz,  $\text{CDCl}_3$ ) spectra of compound **3y**

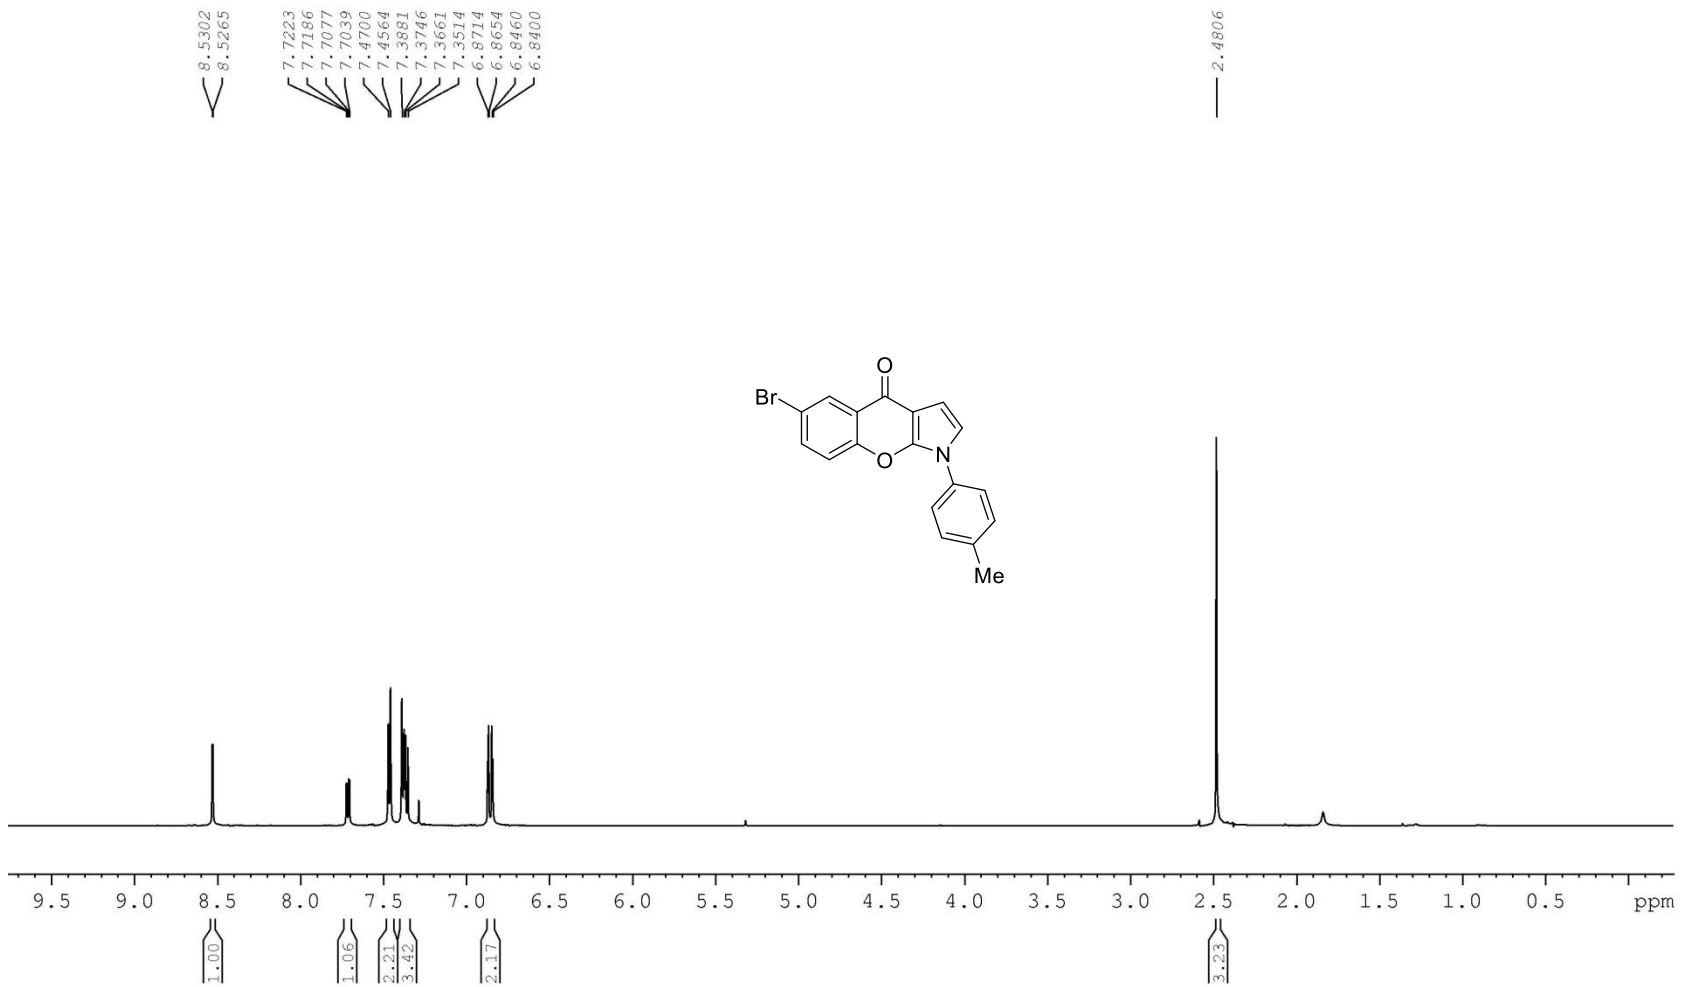

**Figure S76.**  $^1\text{H}$  NMR (600 MHz,  $\text{CDCl}_3$ ) spectra of compound **3z**

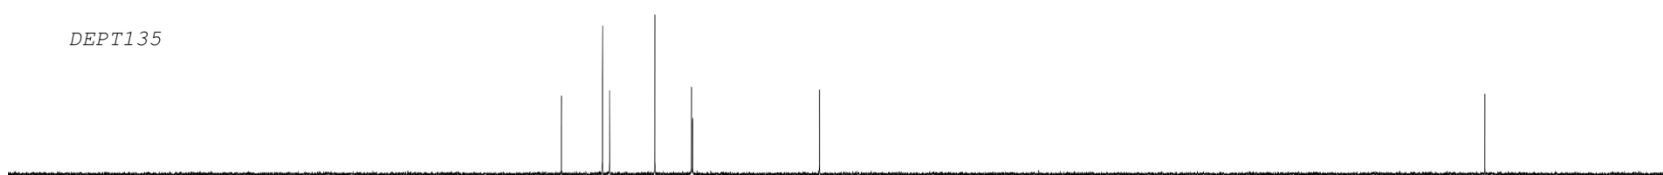

YUNNAN UNIVERSITY ASCEND AVIIIHD600 CLF-27-2  
 Aug19-2021-chenli  
 C13CPD CDCl3

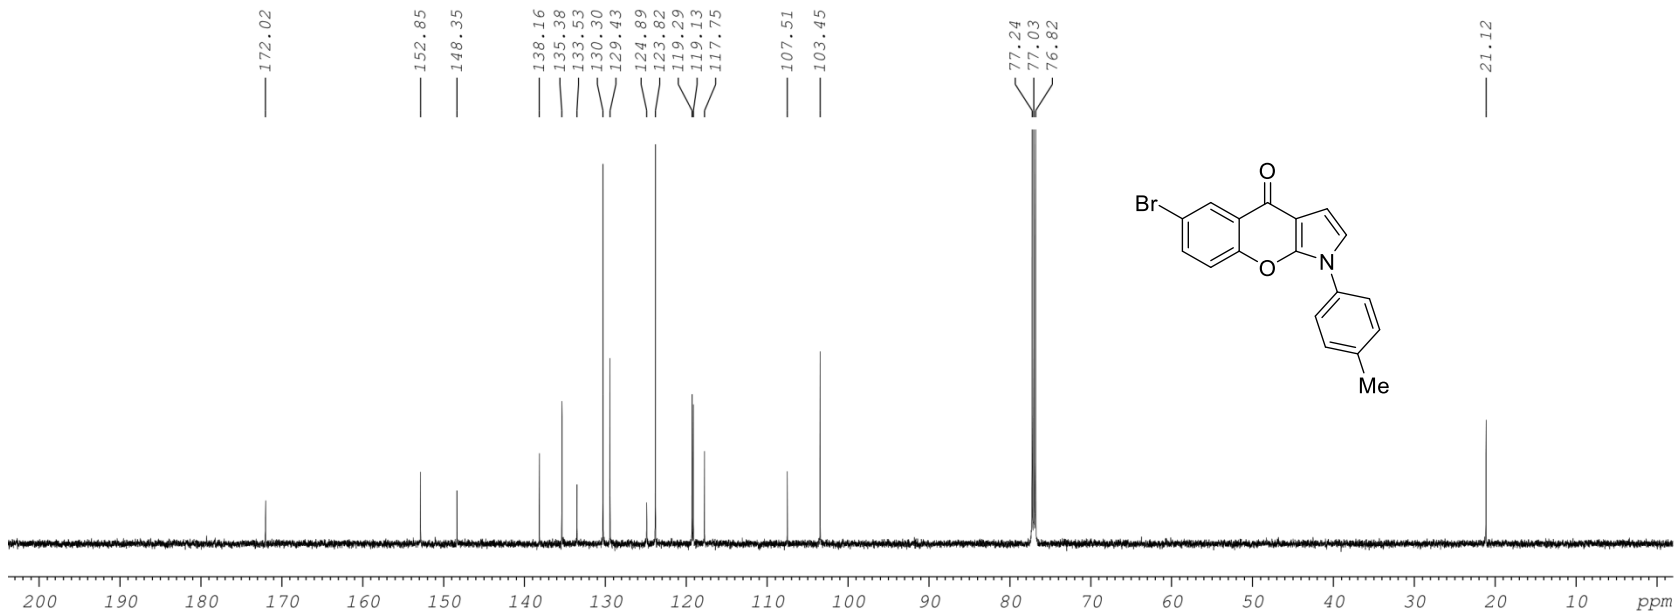

Figure S77.  $^{13}\text{C}$  NMR (150 MHz,  $\text{CDCl}_3$ ) spectra of compound **3z**

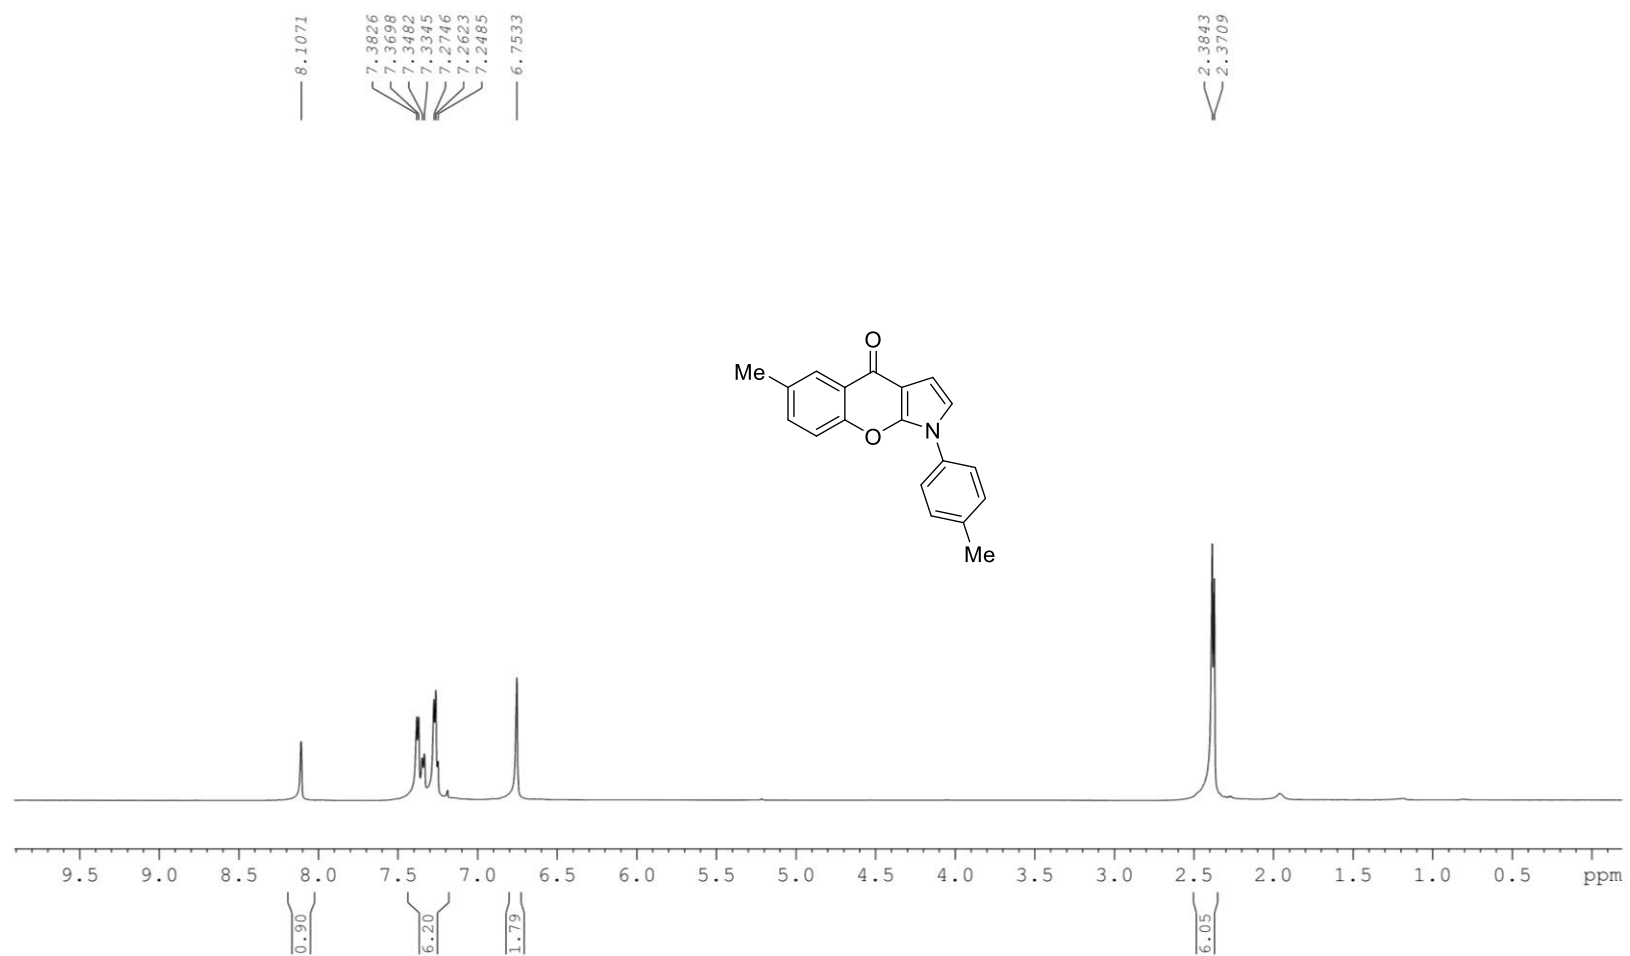

**Figure S78.** <sup>1</sup>H NMR (600 MHz, CDCl<sub>3</sub>) spectra of compound **3a'**

DEPT135

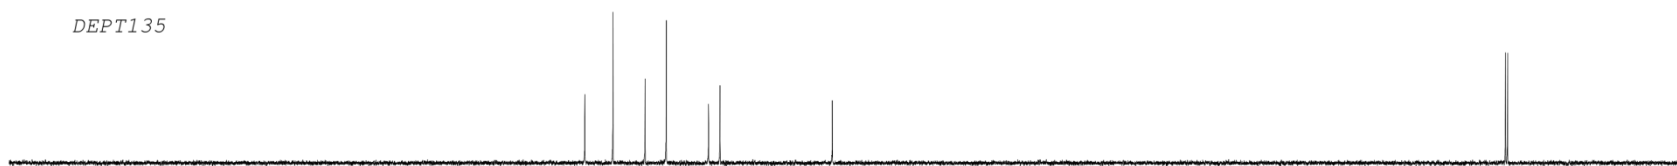

YUNNAN UNIVERSITY ASCEND AVIIIHD600 CLF-30-2  
Aug21-2021-chenli  
C13CPD CDC13

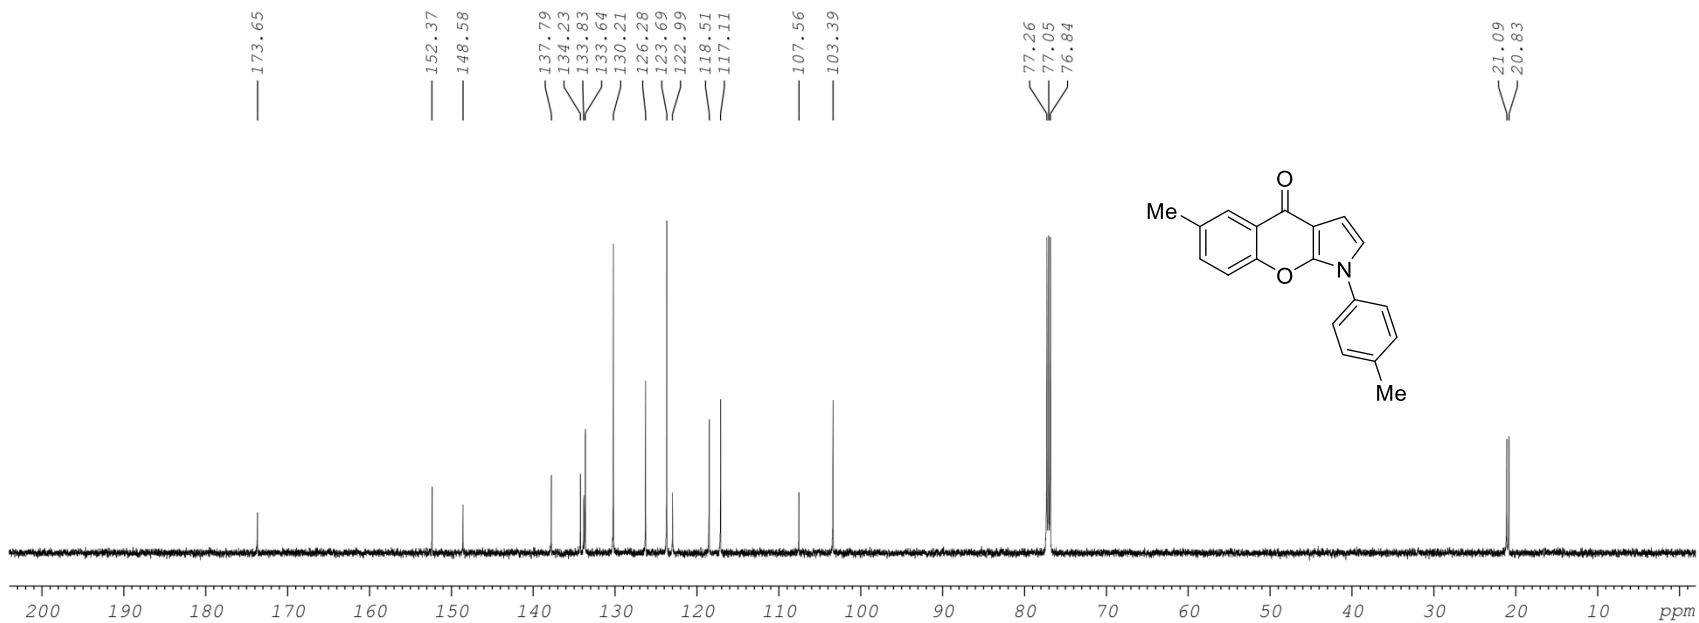

Figure S79. <sup>13</sup>C NMR (150 MHz, CDCl<sub>3</sub>) spectra of compound 3a'



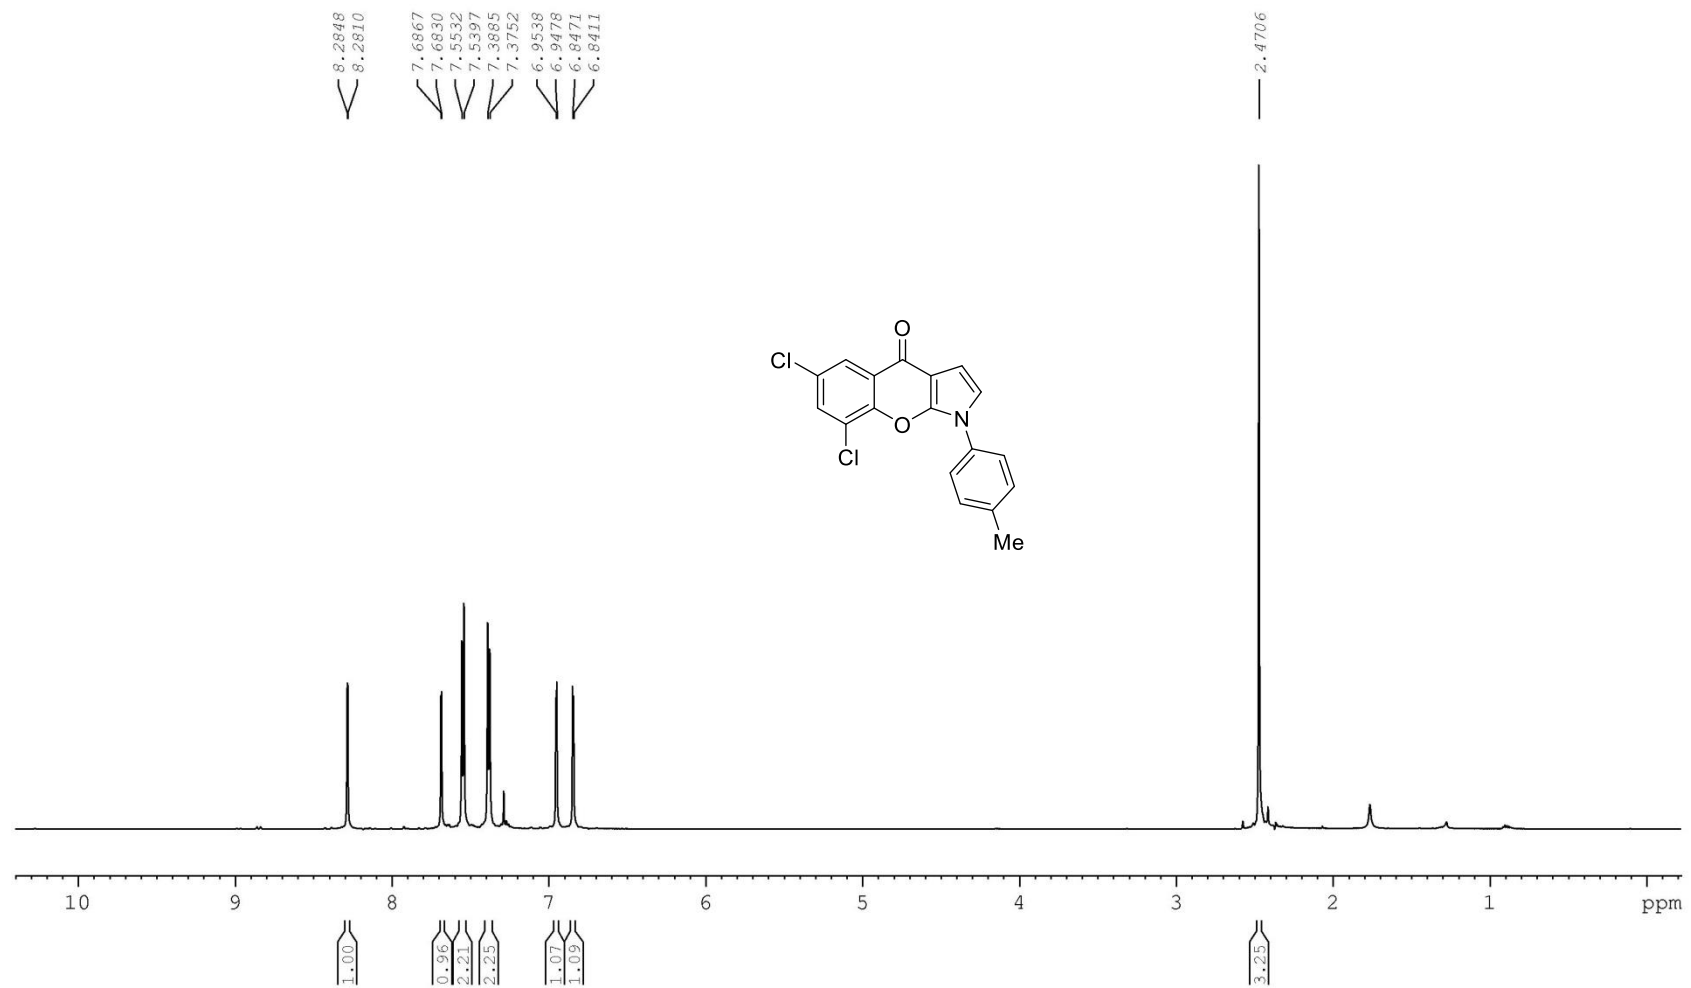

**Figure S80.** <sup>1</sup>H NMR (600 MHz, CDCl<sub>3</sub>) spectra of compound 3b'

DEPT135

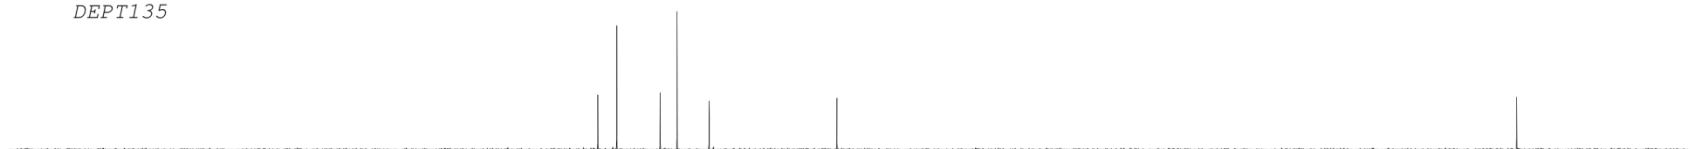

YUNNAN UNIVERSITY ASCEND AVIIIHD600 CLF-29-2  
Aug19-2021-chenli  
C13CPD CDC13

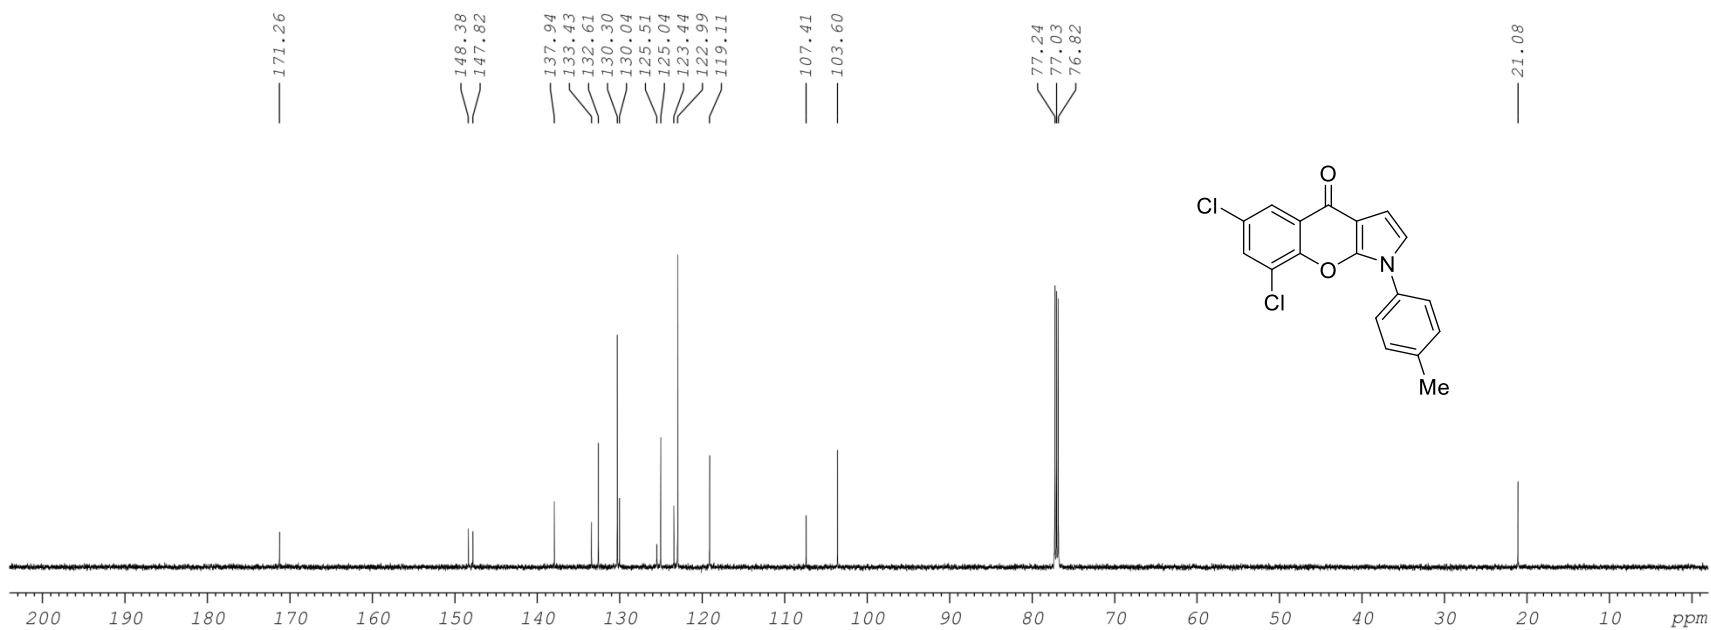

Figure S81. <sup>13</sup>C NMR (150 MHz, CDCl<sub>3</sub>) spectra of compound 3b'

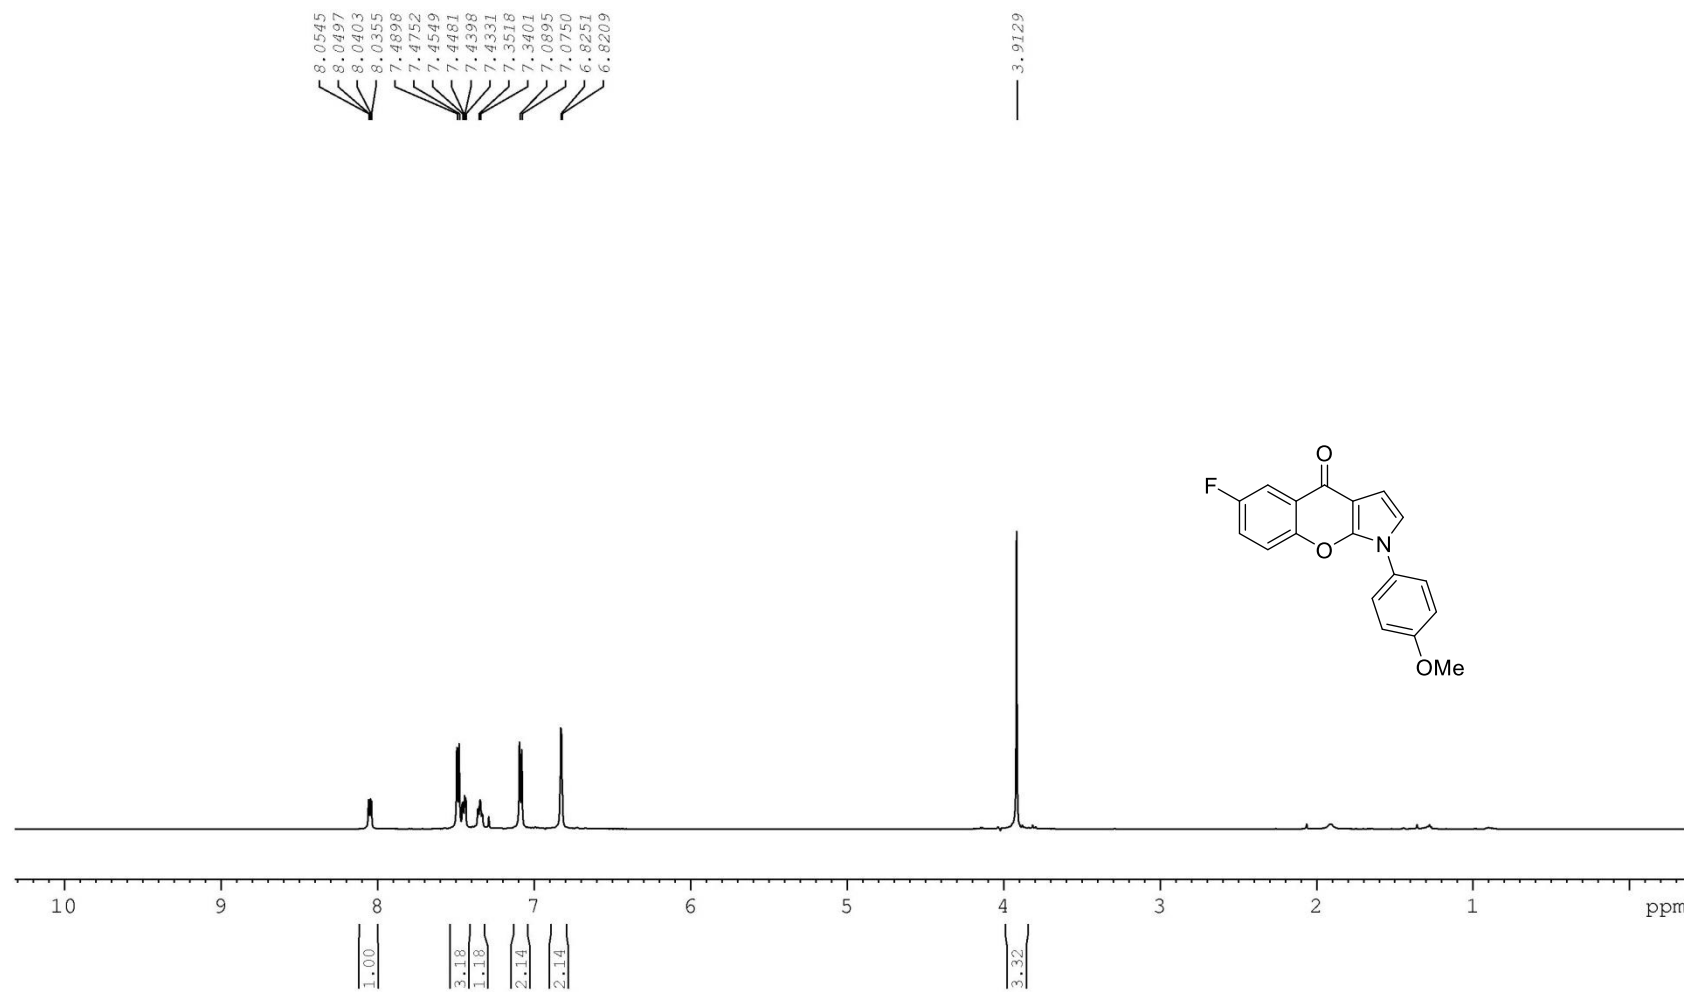

**Figure S82.** <sup>1</sup>H NMR (600 MHz, CDCl<sub>3</sub>) spectra of compound 3c'

DEPT135

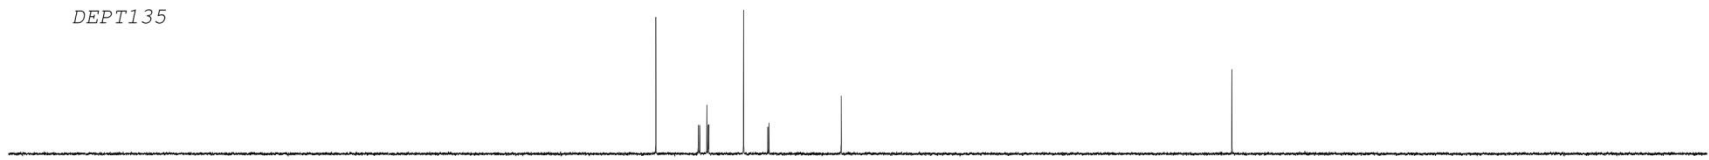

YUNNAN UNIVERSITY ASCEND AVIIIHD600 CLF-19-2  
Aug05-2021-chenli  
C13CPD CDC13

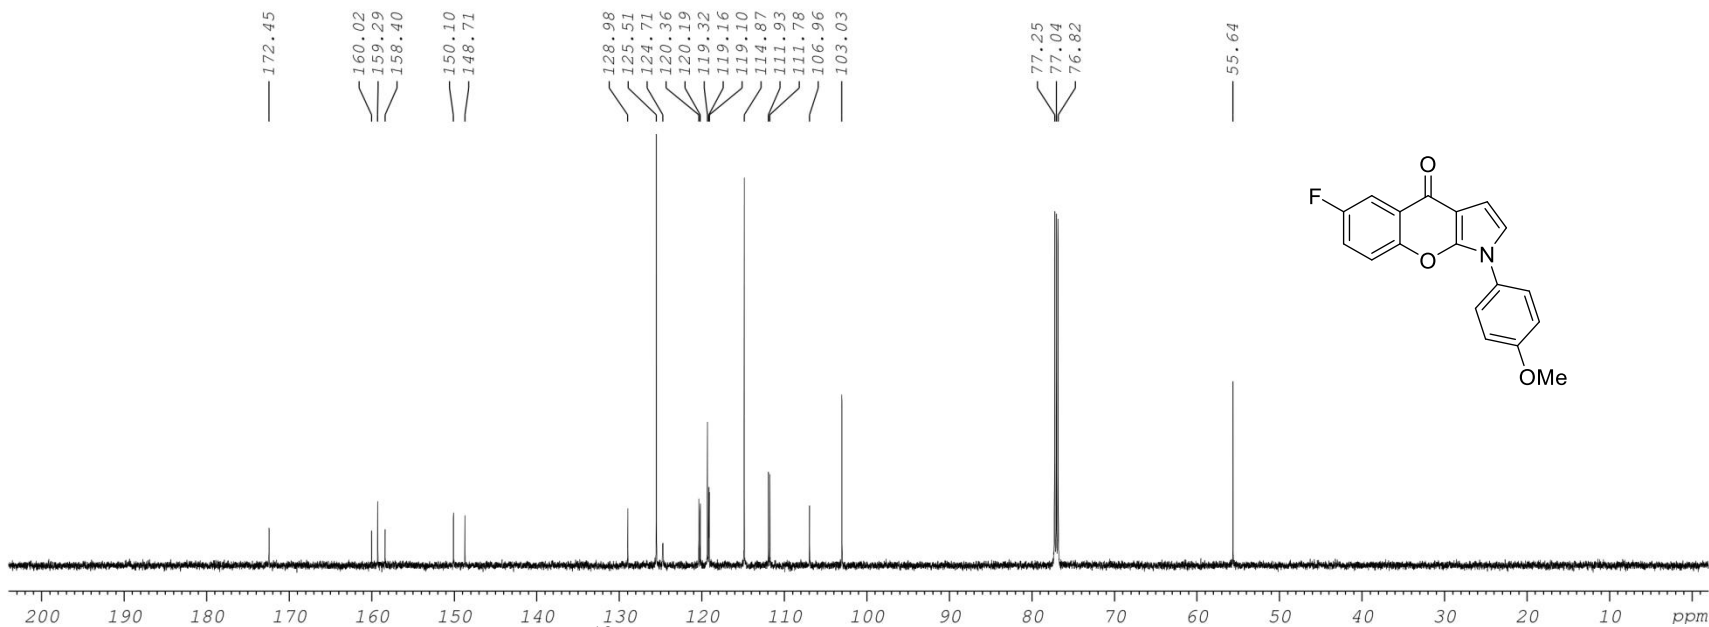

Figure S83.  $^{13}\text{C}$  NMR (150 MHz,  $\text{CDCl}_3$ ) spectra of compound **3c'**

YUNNAN UNIVERSITY ASCEND AVIIIHD600 CLF-19-2  
Aug05-2021-chenli  
F19CPD CDCl3

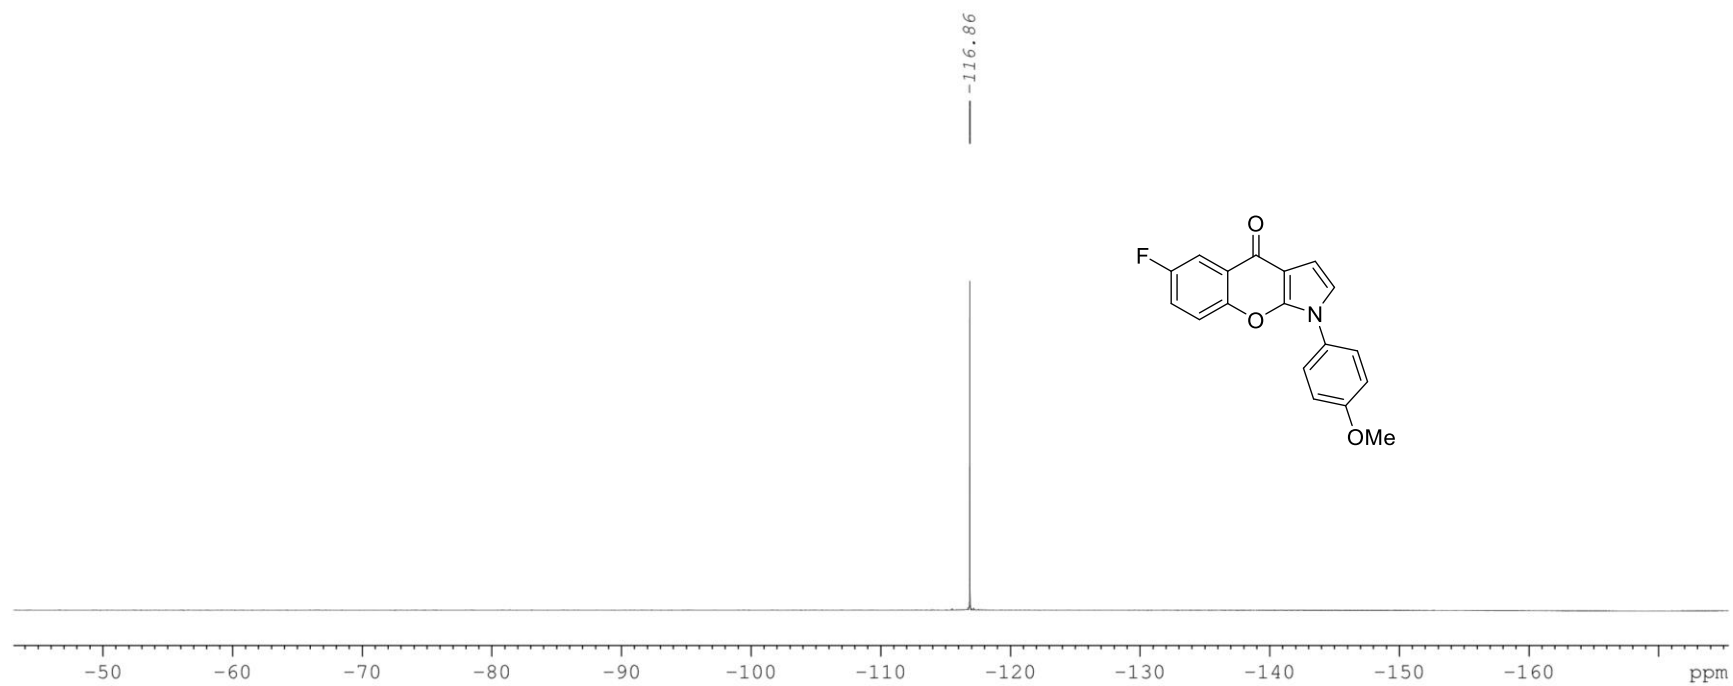

**Figure S84.**  $^{19}\text{F}$  NMR (564 MHz,  $\text{CDCl}_3$ ) spectra of compound **3c'**

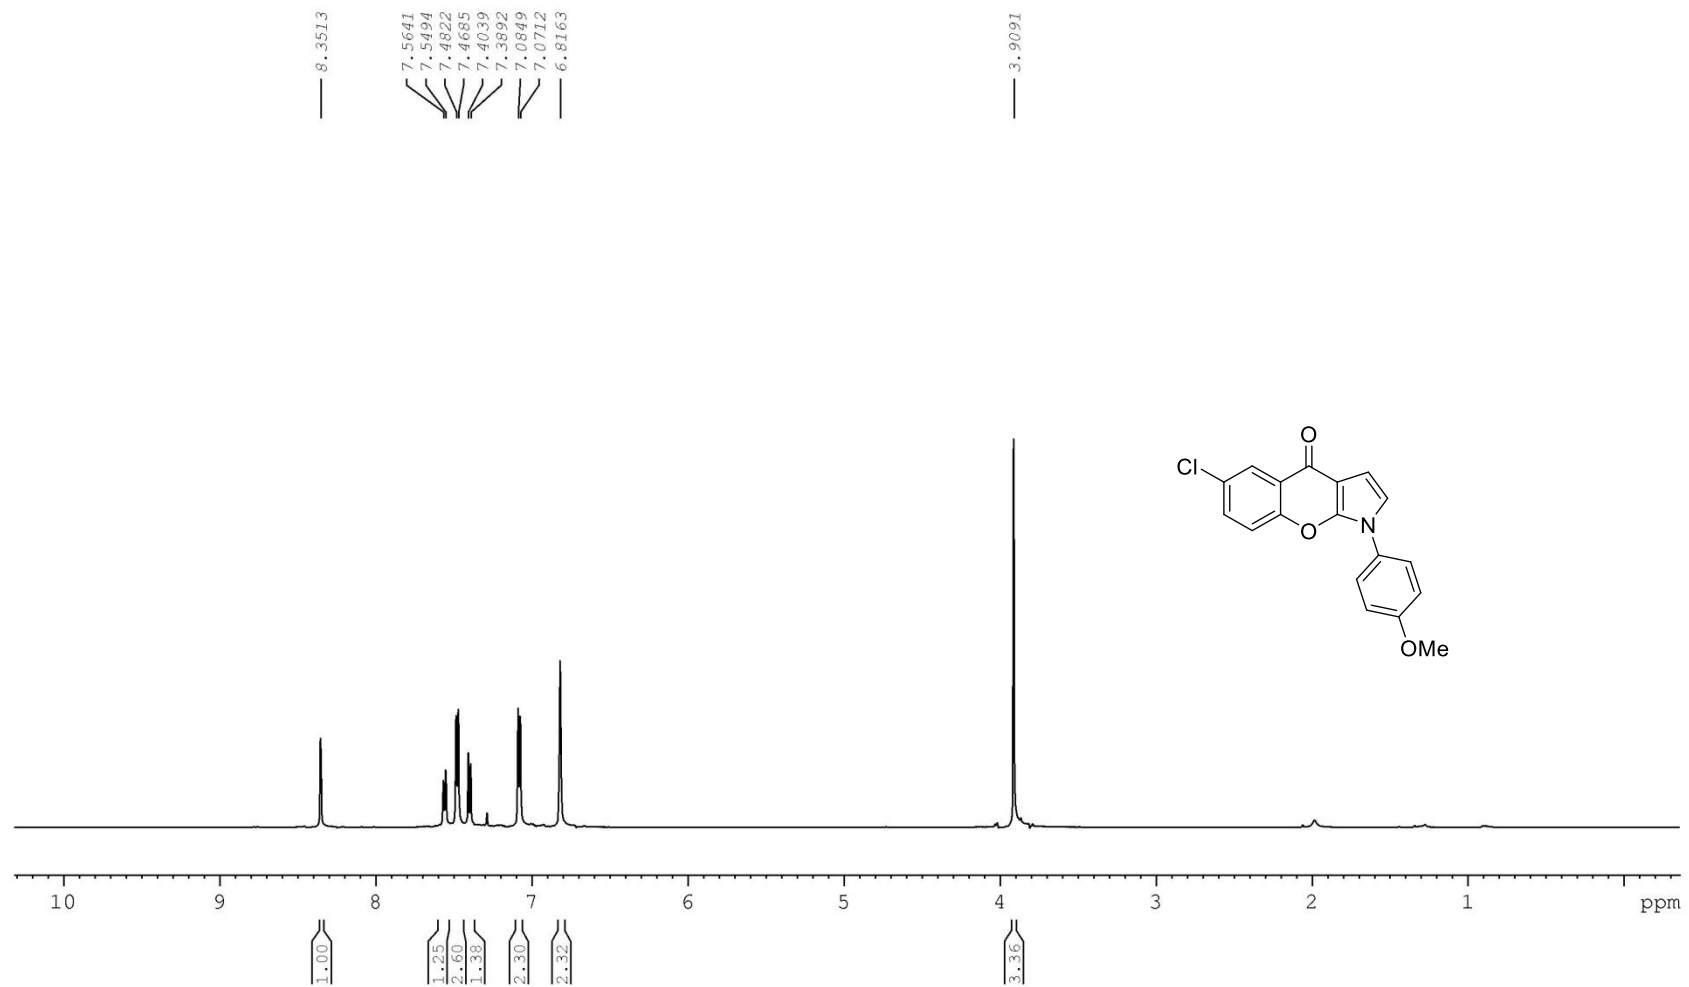

**Figure S85.** <sup>1</sup>H NMR (600 MHz, CDCl<sub>3</sub>) spectra of compound **3d'**

DEPT135

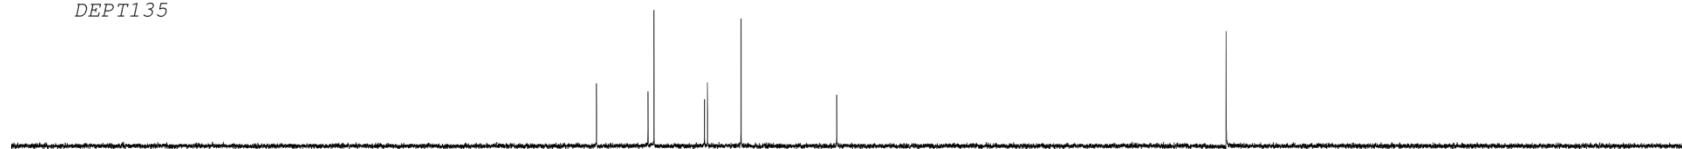

YUNNAN UNIVERSITY ASCEND AVIIIHD600 CLF-22-2  
Aug09-2021-chenli  
C13CPD CDC13

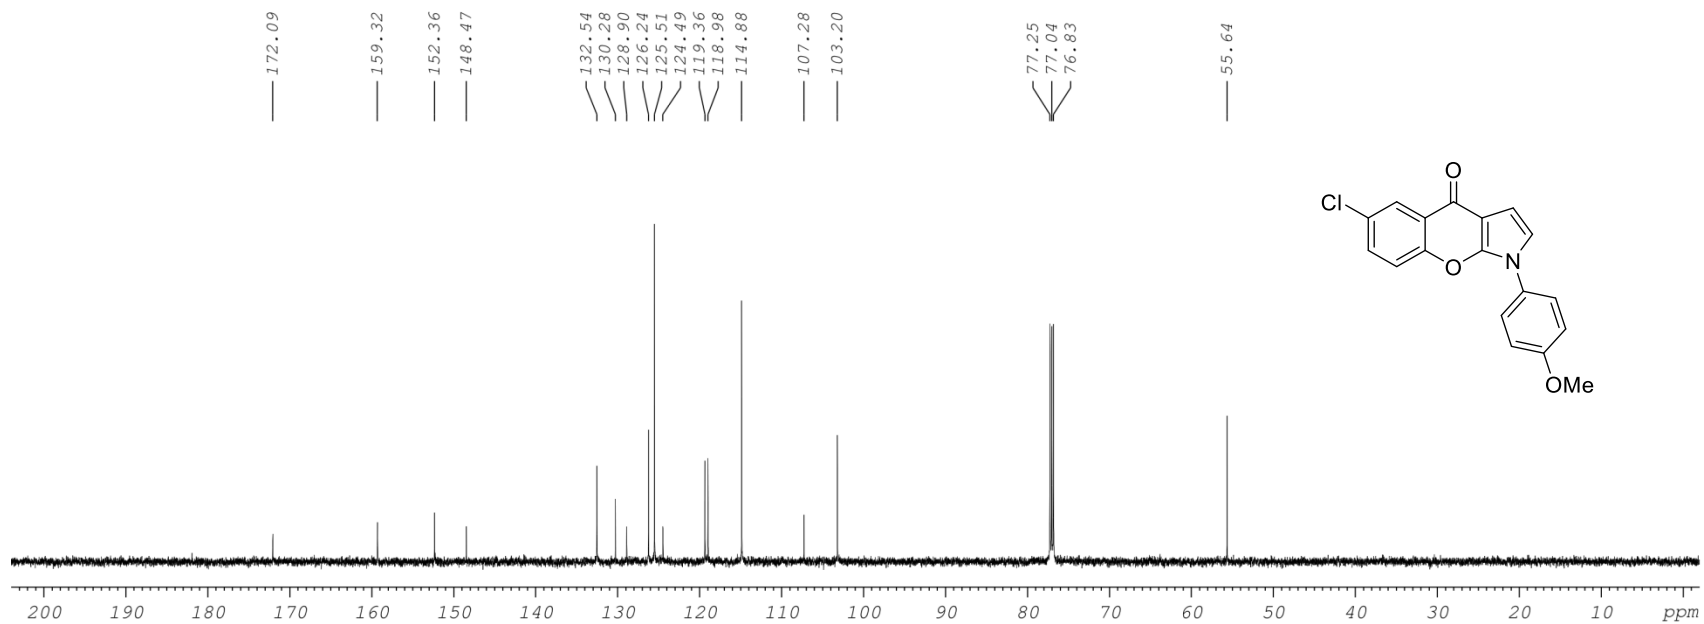

Figure S86. <sup>13</sup>C NMR (150 MHz, CDCl<sub>3</sub>) spectra of compound 3d'

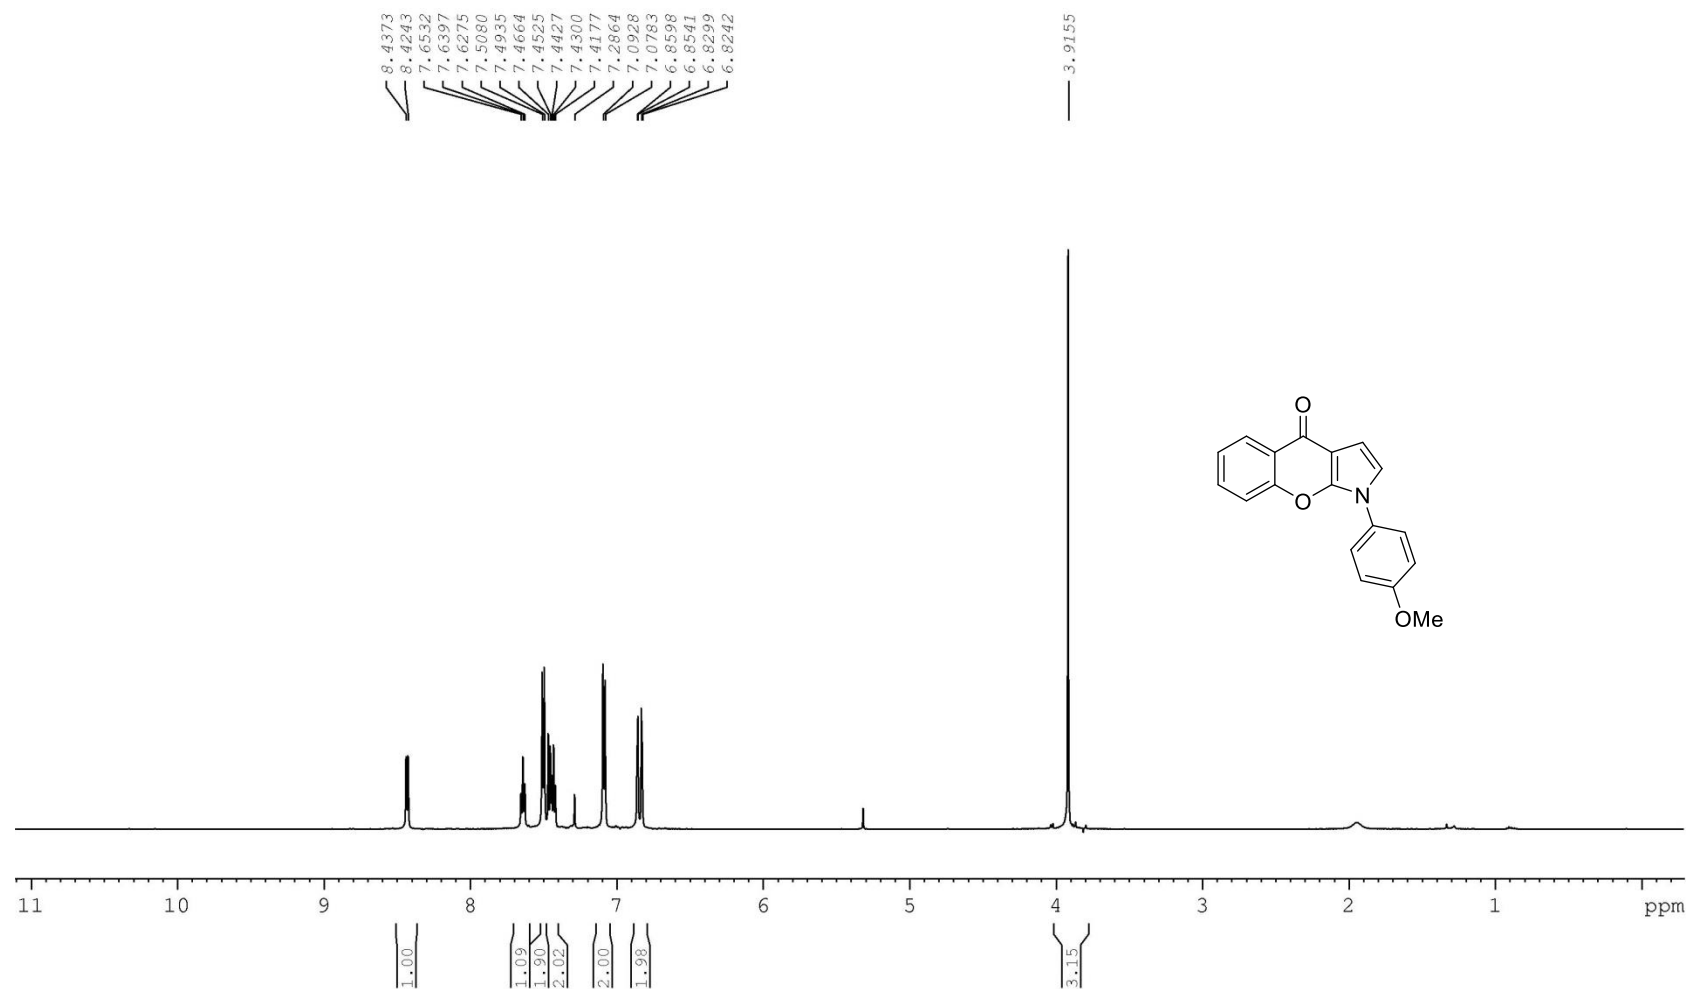

**Figure S87.** <sup>1</sup>H NMR (600 MHz, CDCl<sub>3</sub>) spectra of compound **3e'**



DEPT135

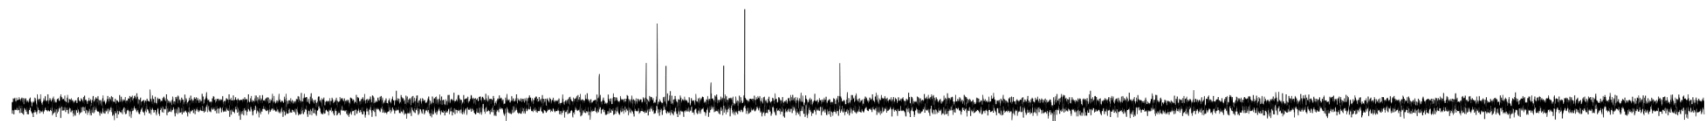

YUNNAN UNIVERSITY ASCEND AVIIIHD600 CLF-14  
Aug16-2021-chenli  
C13CPD CDCl3

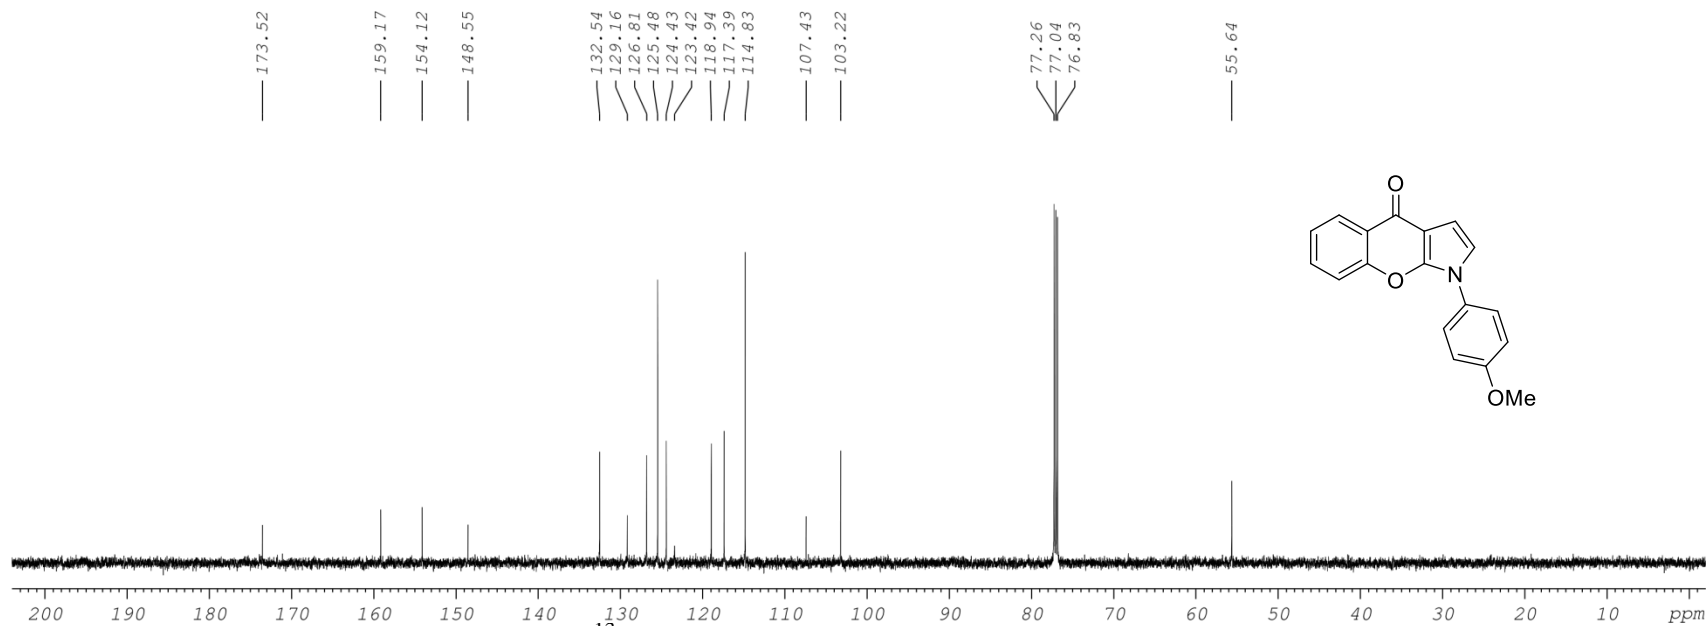

Figure S88. <sup>13</sup>C NMR (150 MHz, CDCl<sub>3</sub>) spectra of compound 3e'

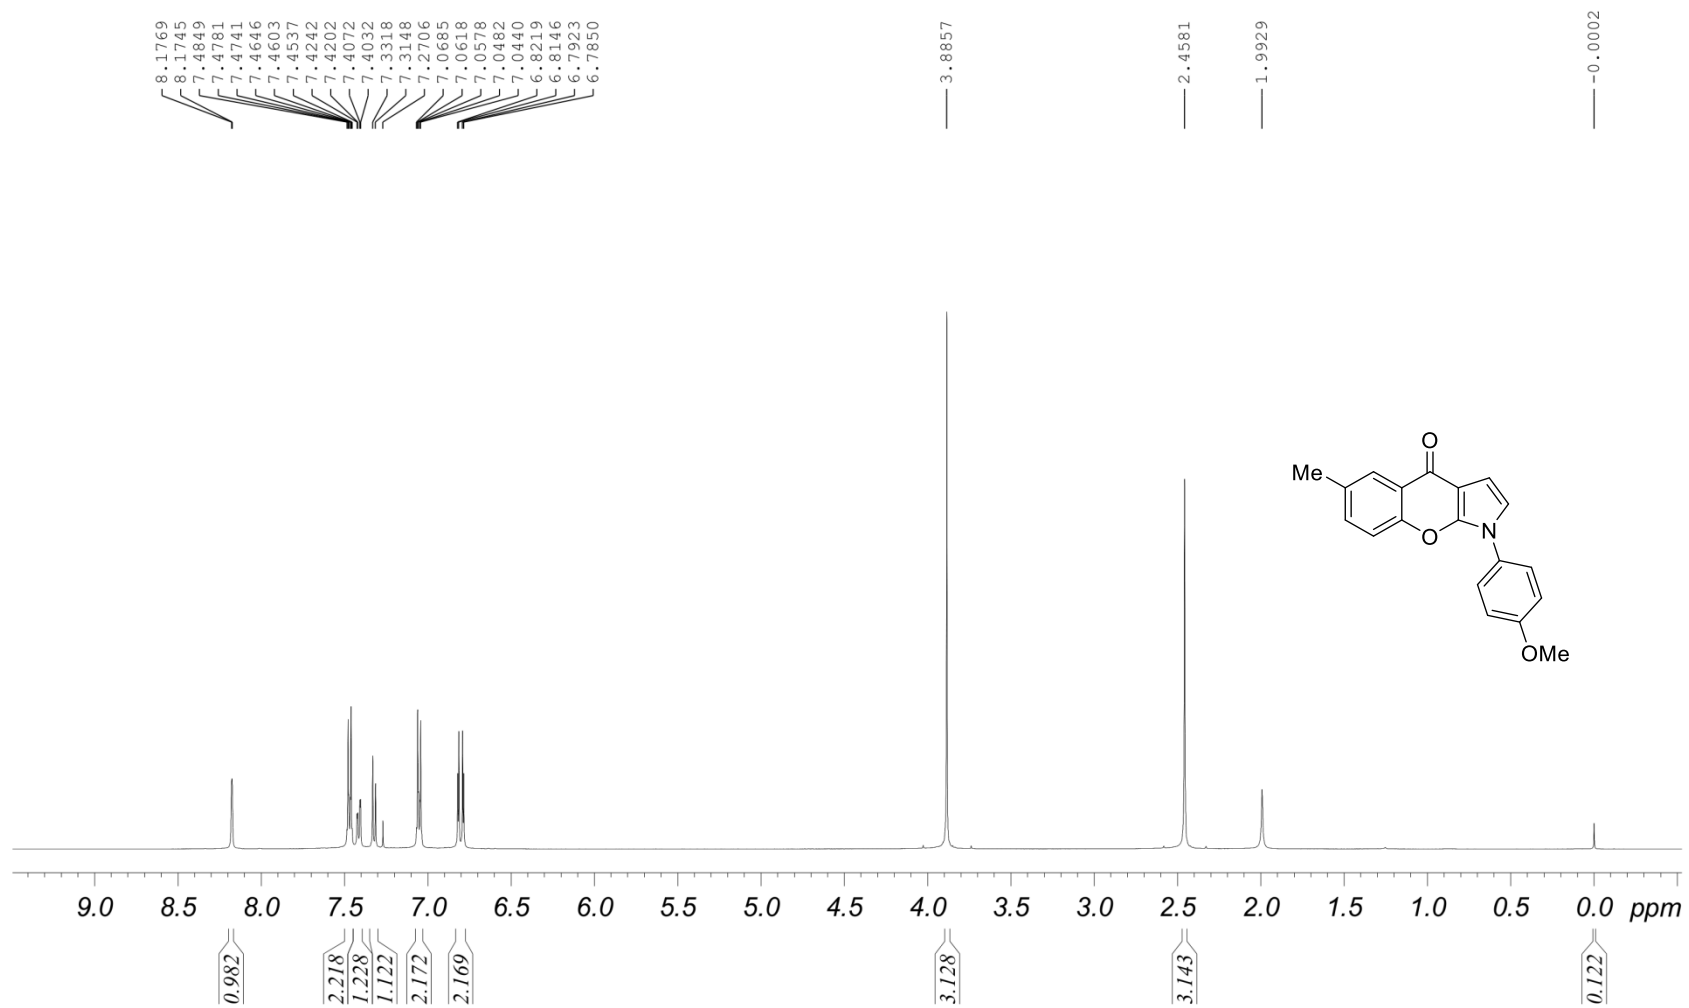

Figure S89.  $^1\text{H}$  NMR (500 MHz,  $\text{CDCl}_3$ ) spectra of compound 3f

DEPT135

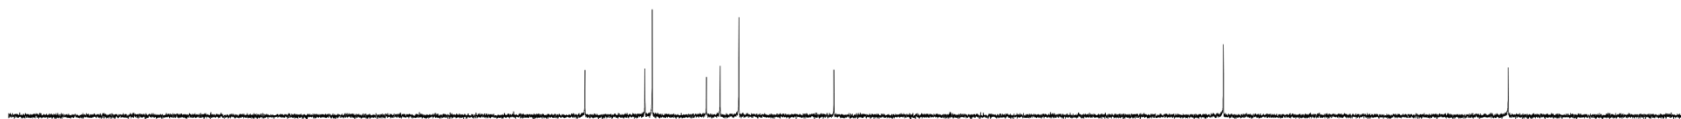

YUNNAN UNIVERSITY ASCEND AVIIIHD600 CLF-21-2  
Aug09-2021-chenli  
C13CPD CDCl3

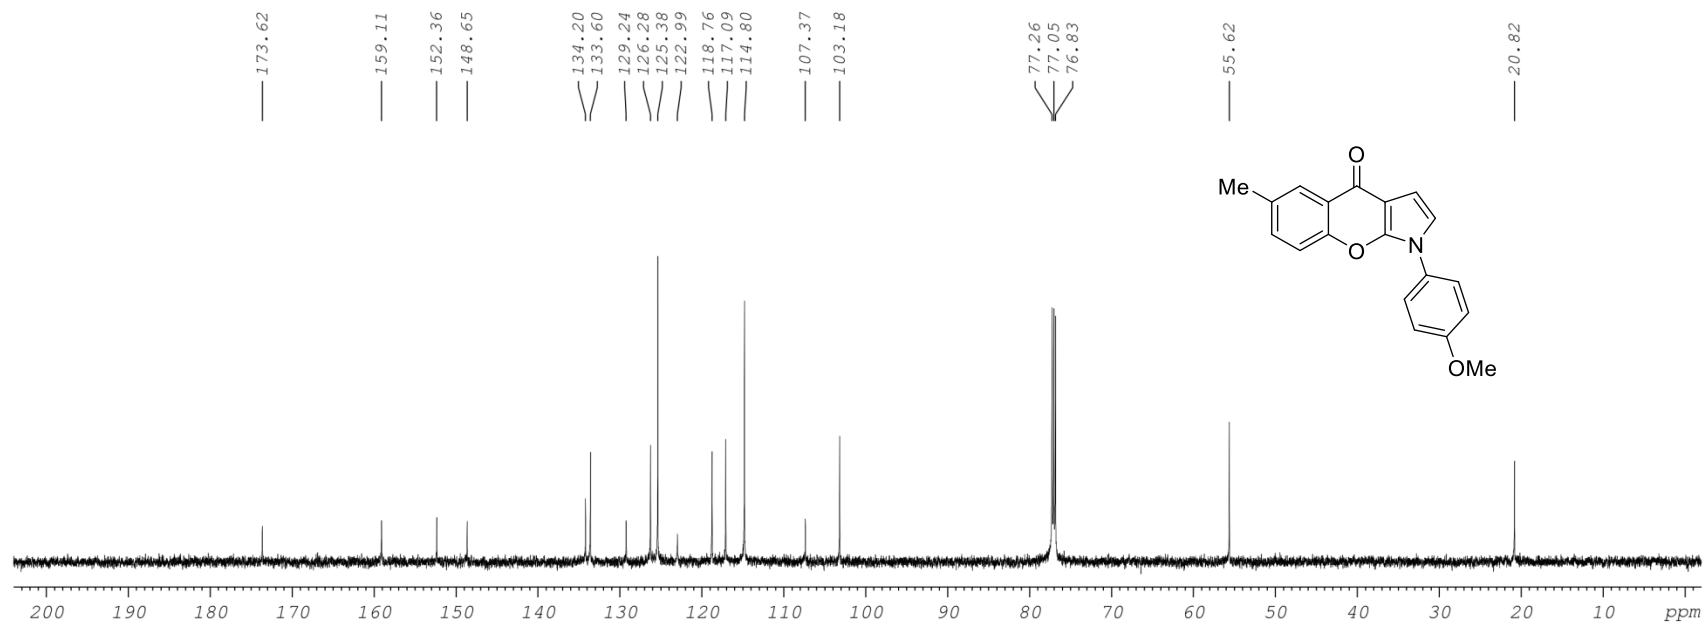

Figure S90.  $^{13}\text{C}$  NMR (150 MHz,  $\text{CDCl}_3$ ) spectra of compound **3f**

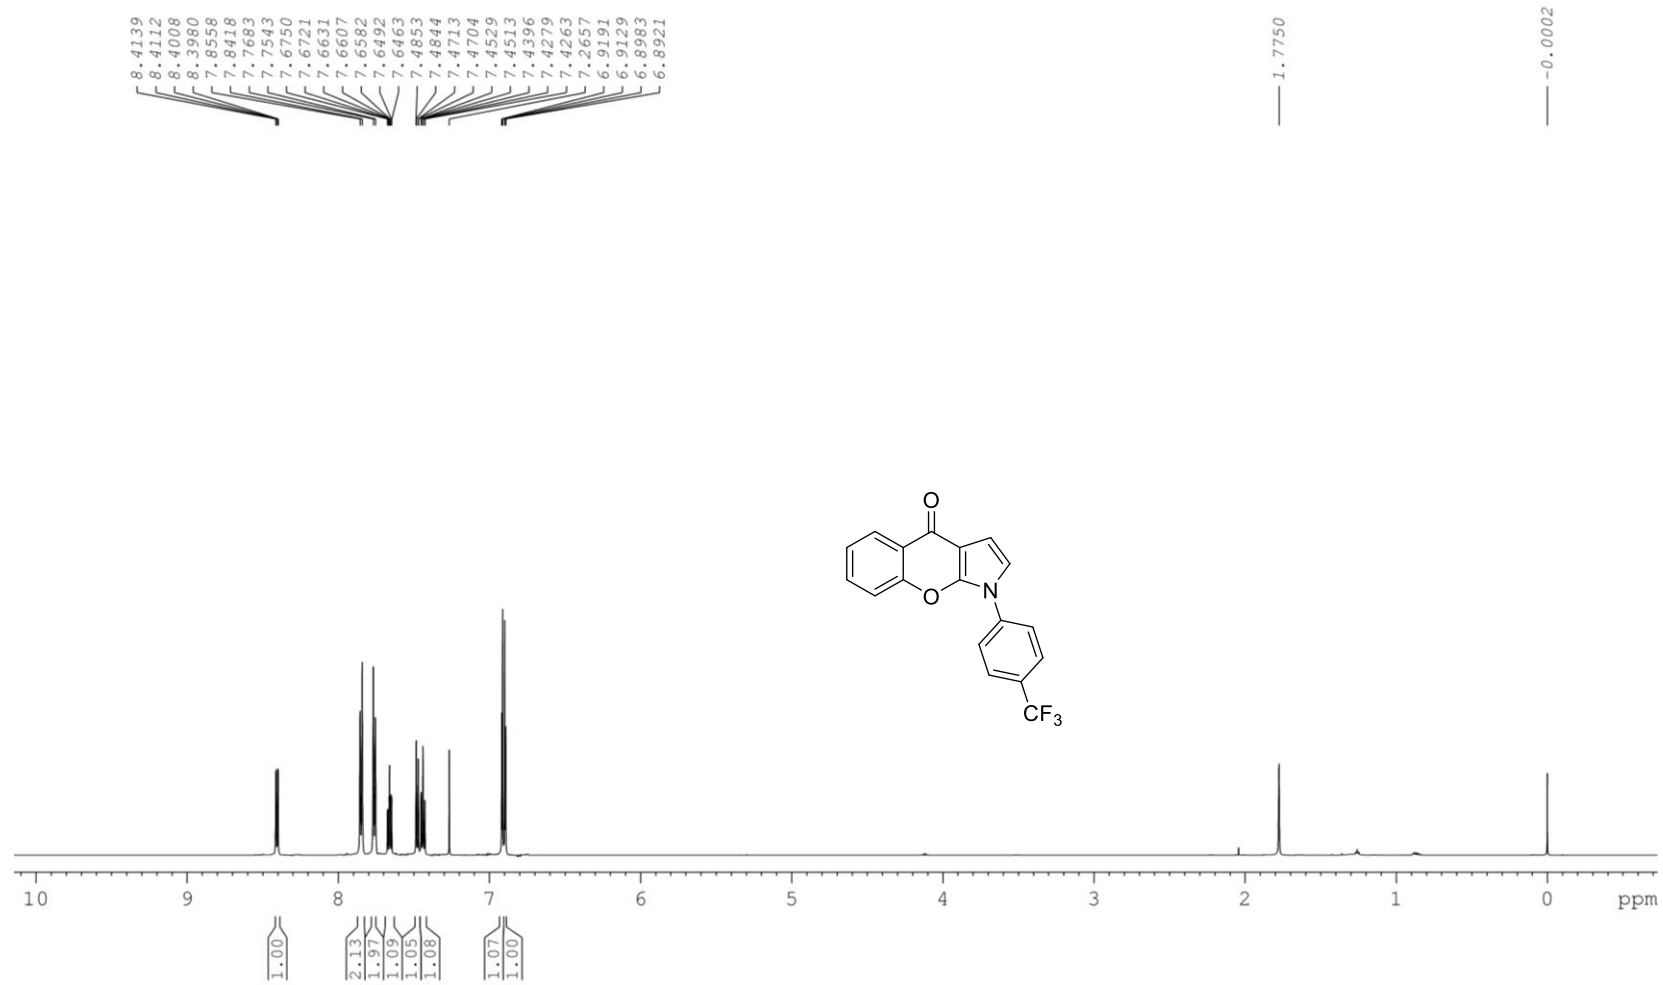

**Figure S91.** <sup>1</sup>H NMR (600 MHz, CDCl<sub>3</sub>) spectra of compound **3g'**

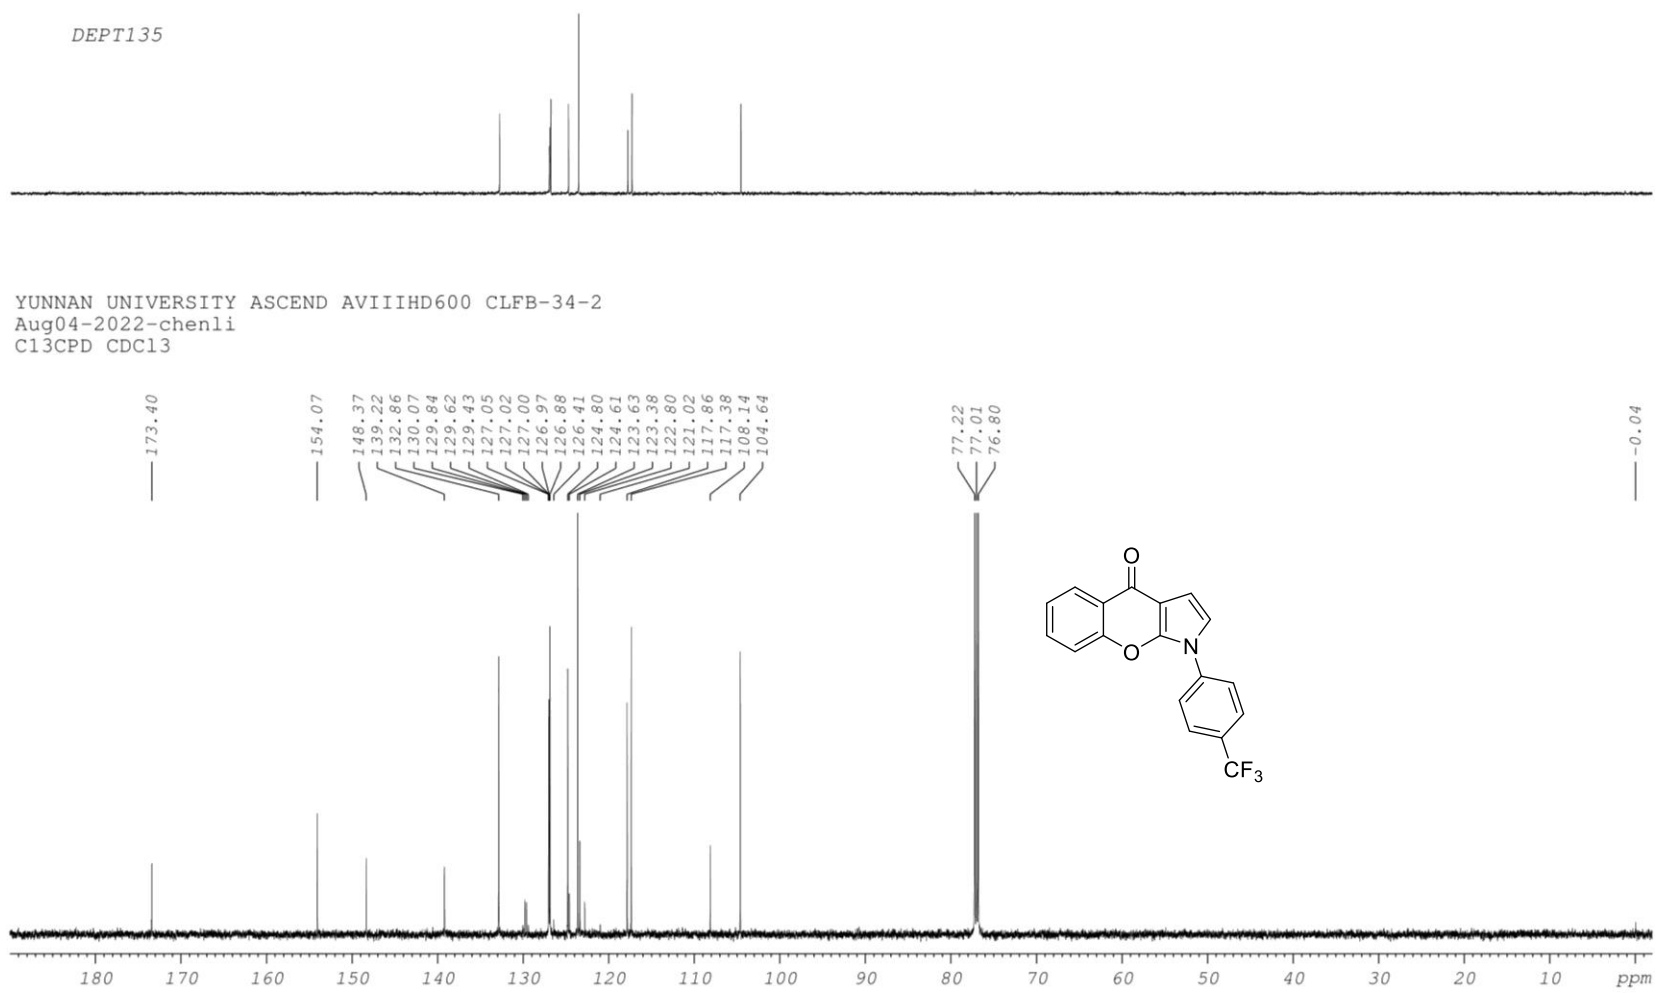

Figure S92.  $^{13}\text{C}$  NMR (150 MHz,  $\text{CDCl}_3$ ) spectra of compound **3g'**

YUNNAN UNIVERSITY ASCEND AVIIIHD600 CLFB-34-2  
Aug04-2022-chenli  
F19CPD CDCl3

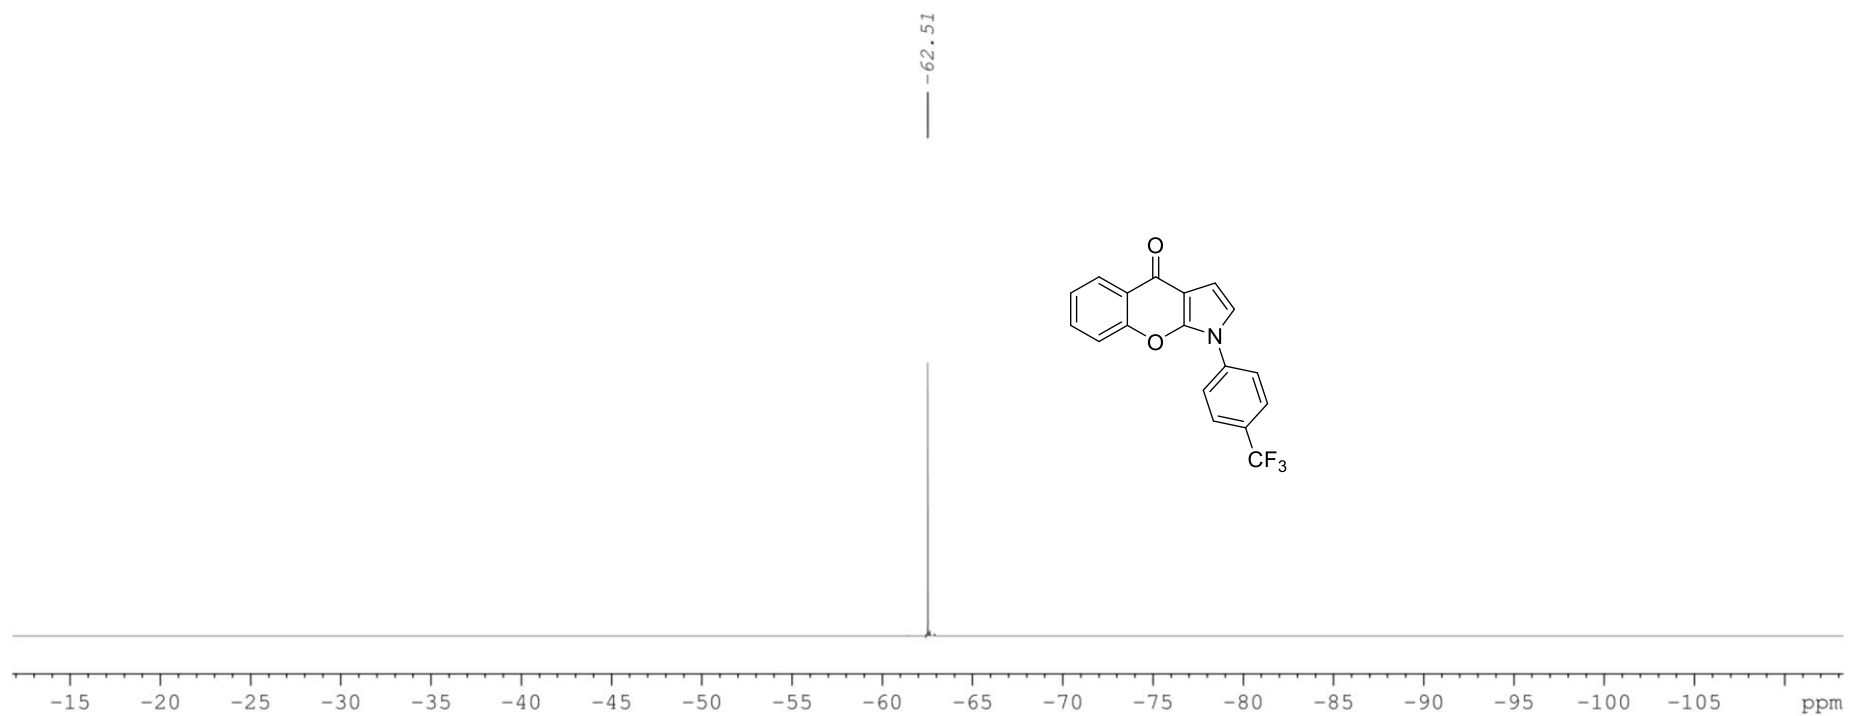

**Figure S93.**  $^{19}\text{F}$  NMR (564 MHz,  $\text{CDCl}_3$ ) spectra of compound **3g'**

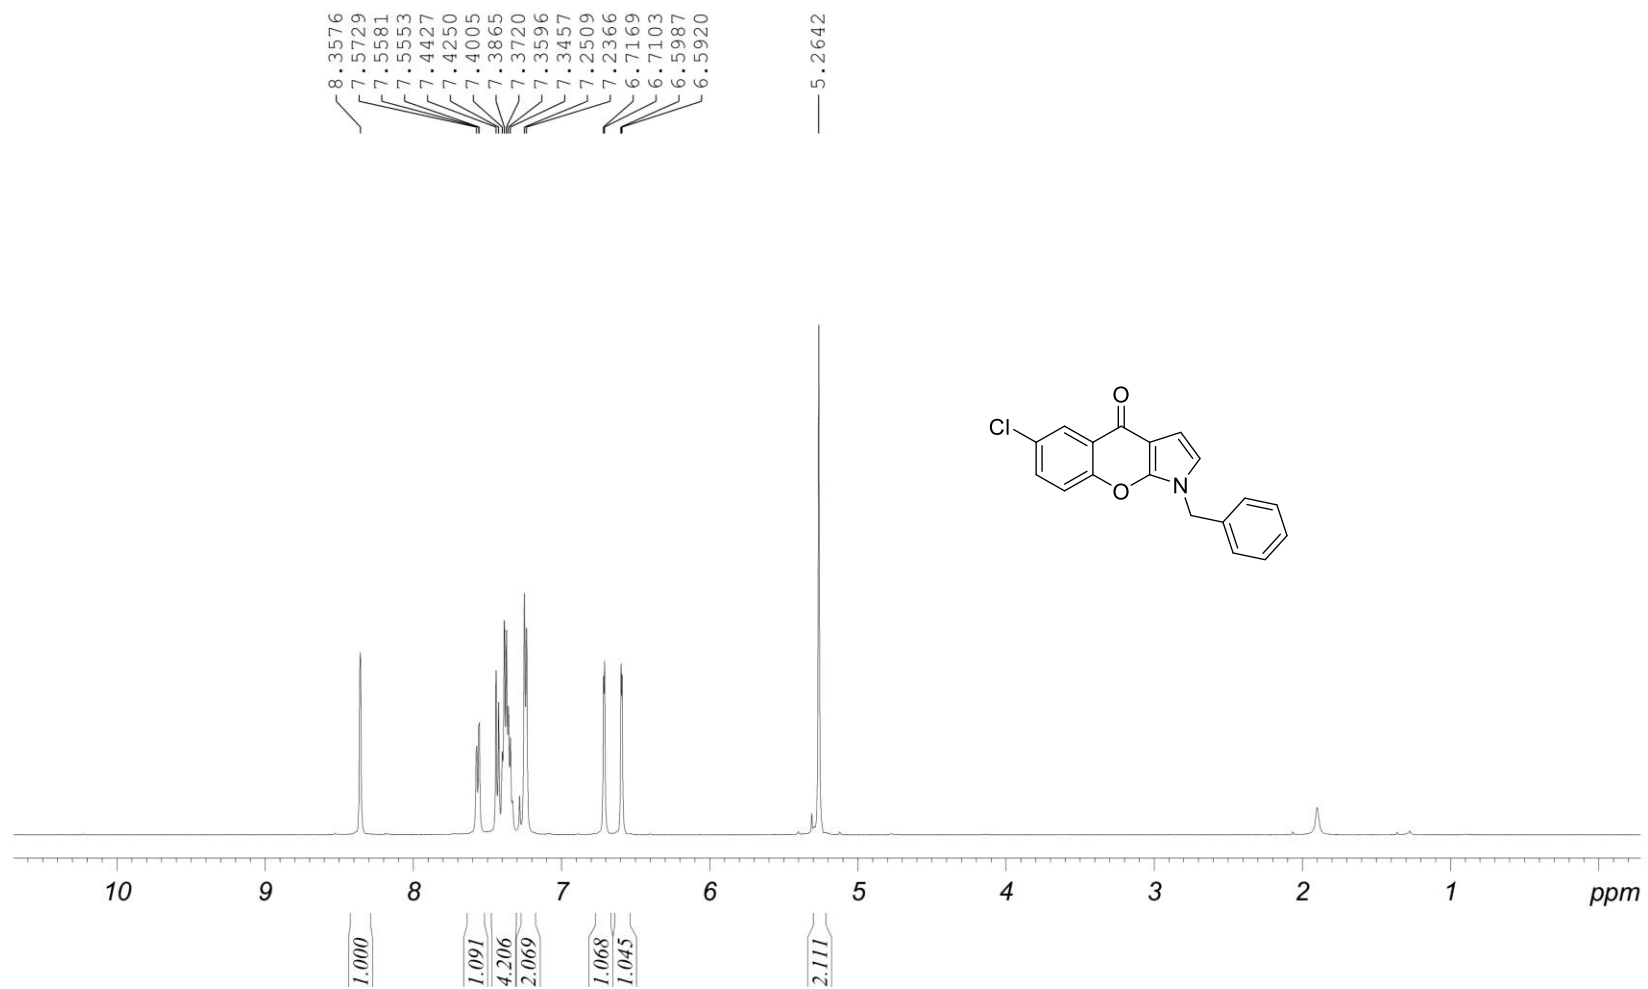

**Figure S94.**  $^1\text{H NMR}$  (500 MHz,  $\text{CDCl}_3$ ) spectra of compound **3h'**

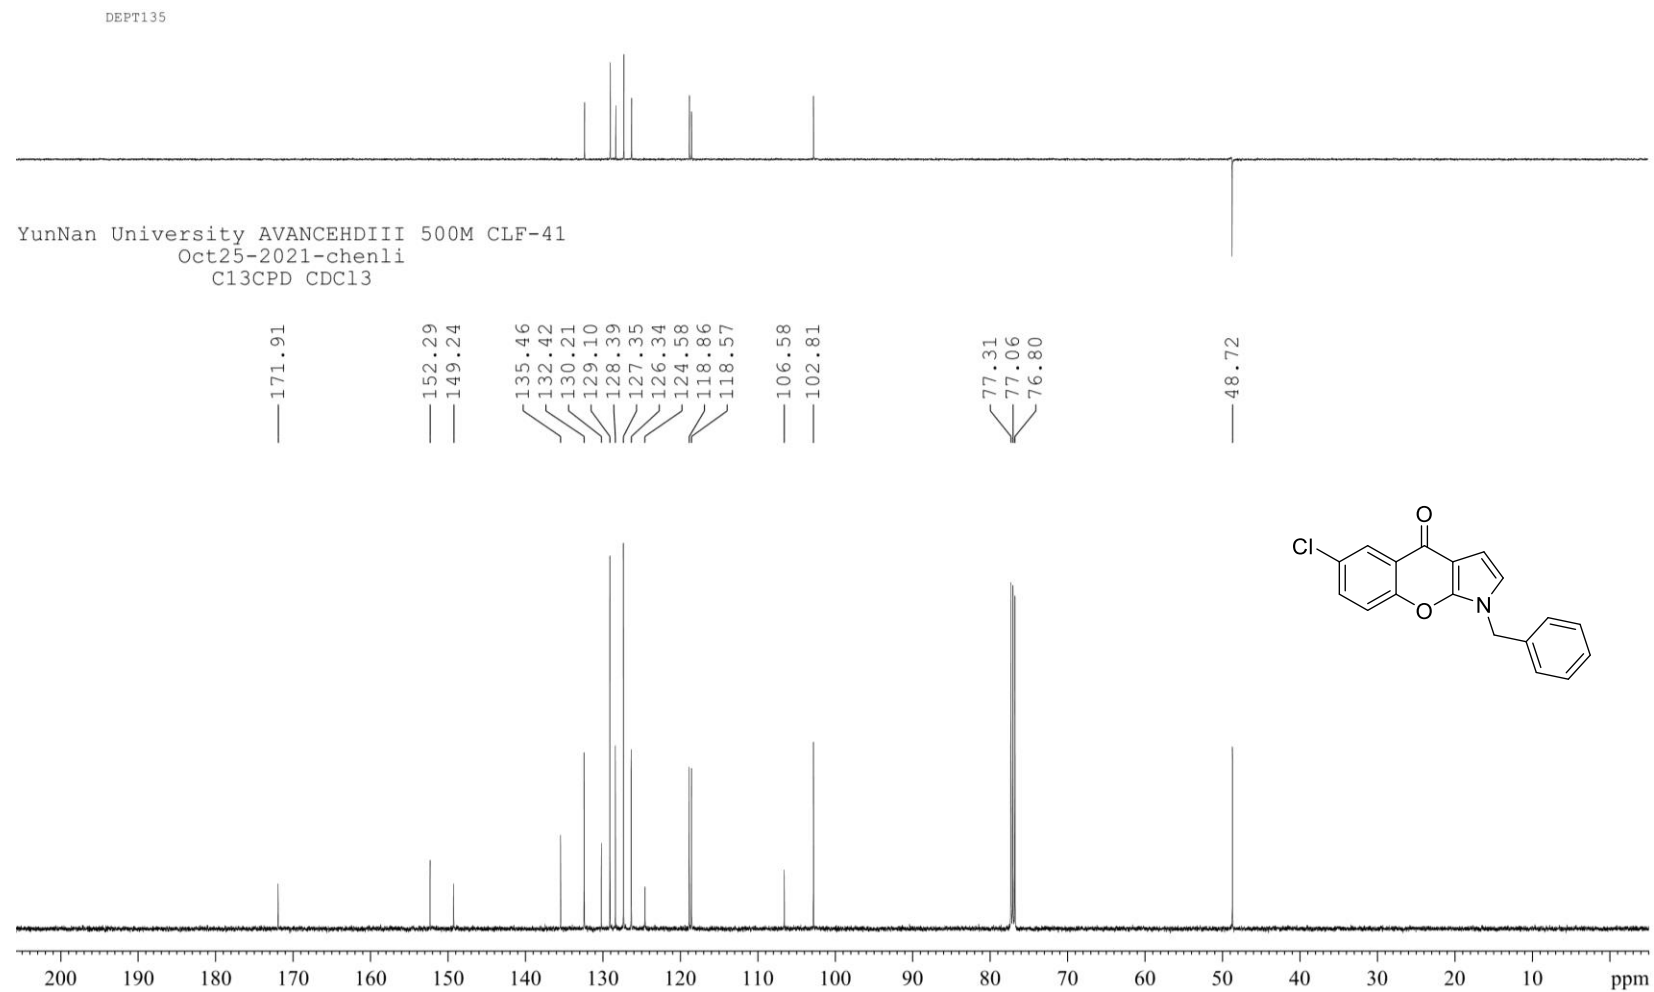

Figure S95.  $^{13}\text{C}$  NMR (125 MHz,  $\text{CDCl}_3$ ) spectra of compound 3h'



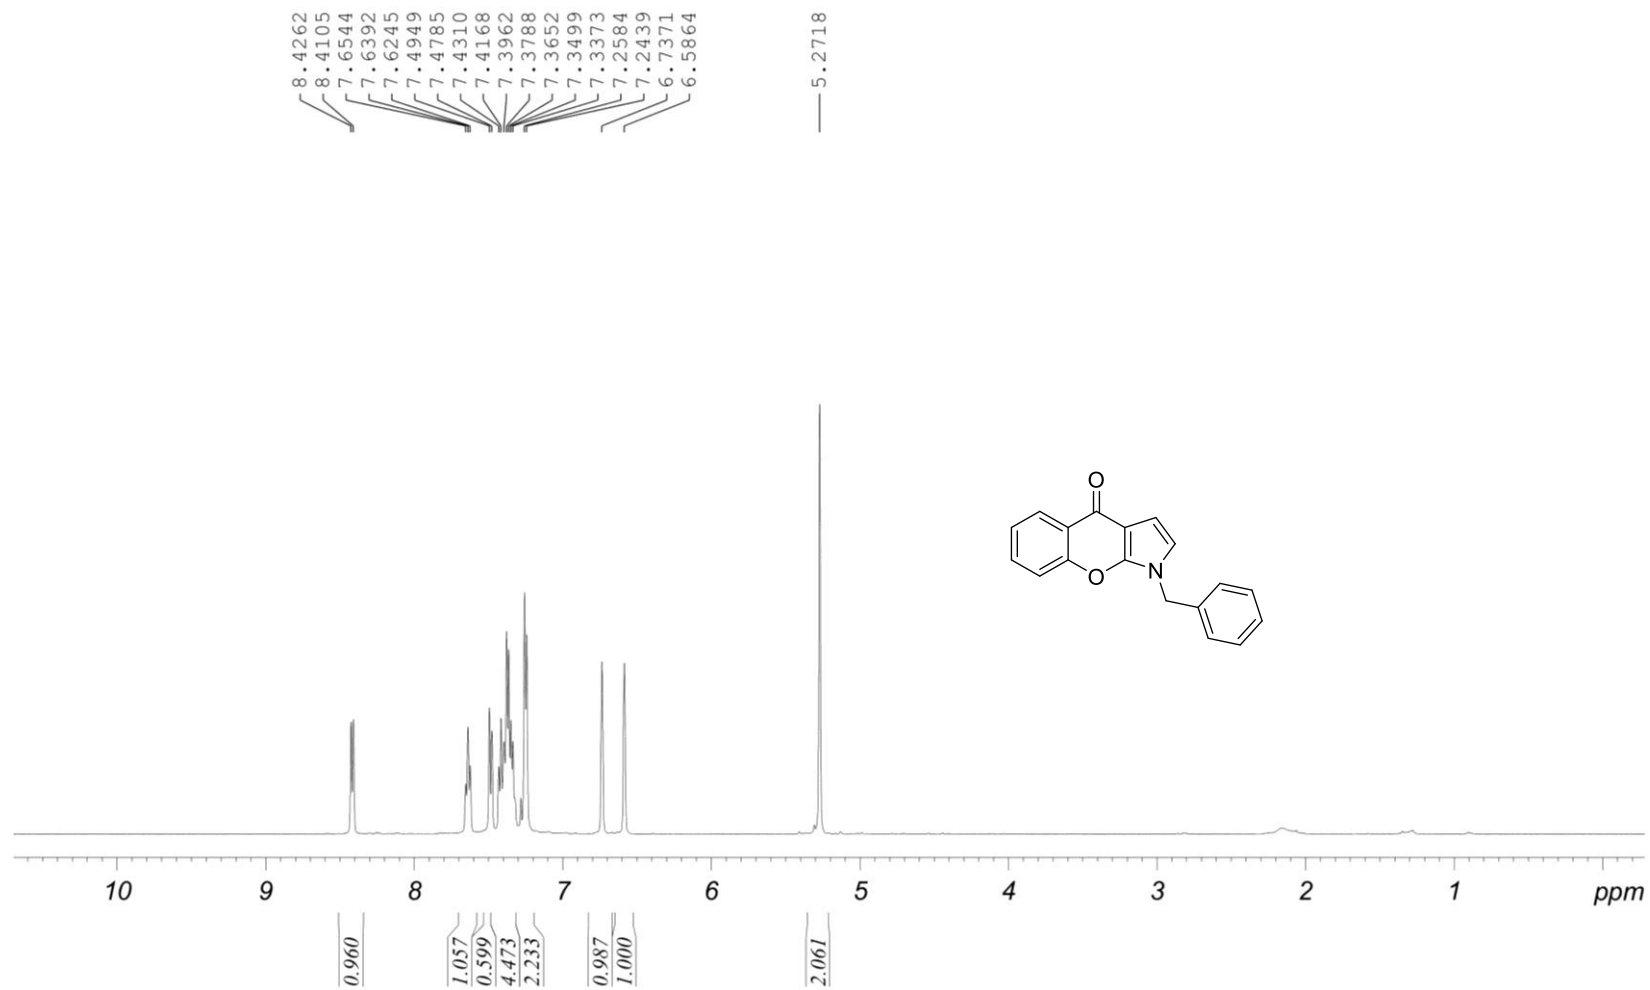

Figure S96. <sup>1</sup>H NMR (500 MHz, CDCl<sub>3</sub>) spectra of compound 3i'

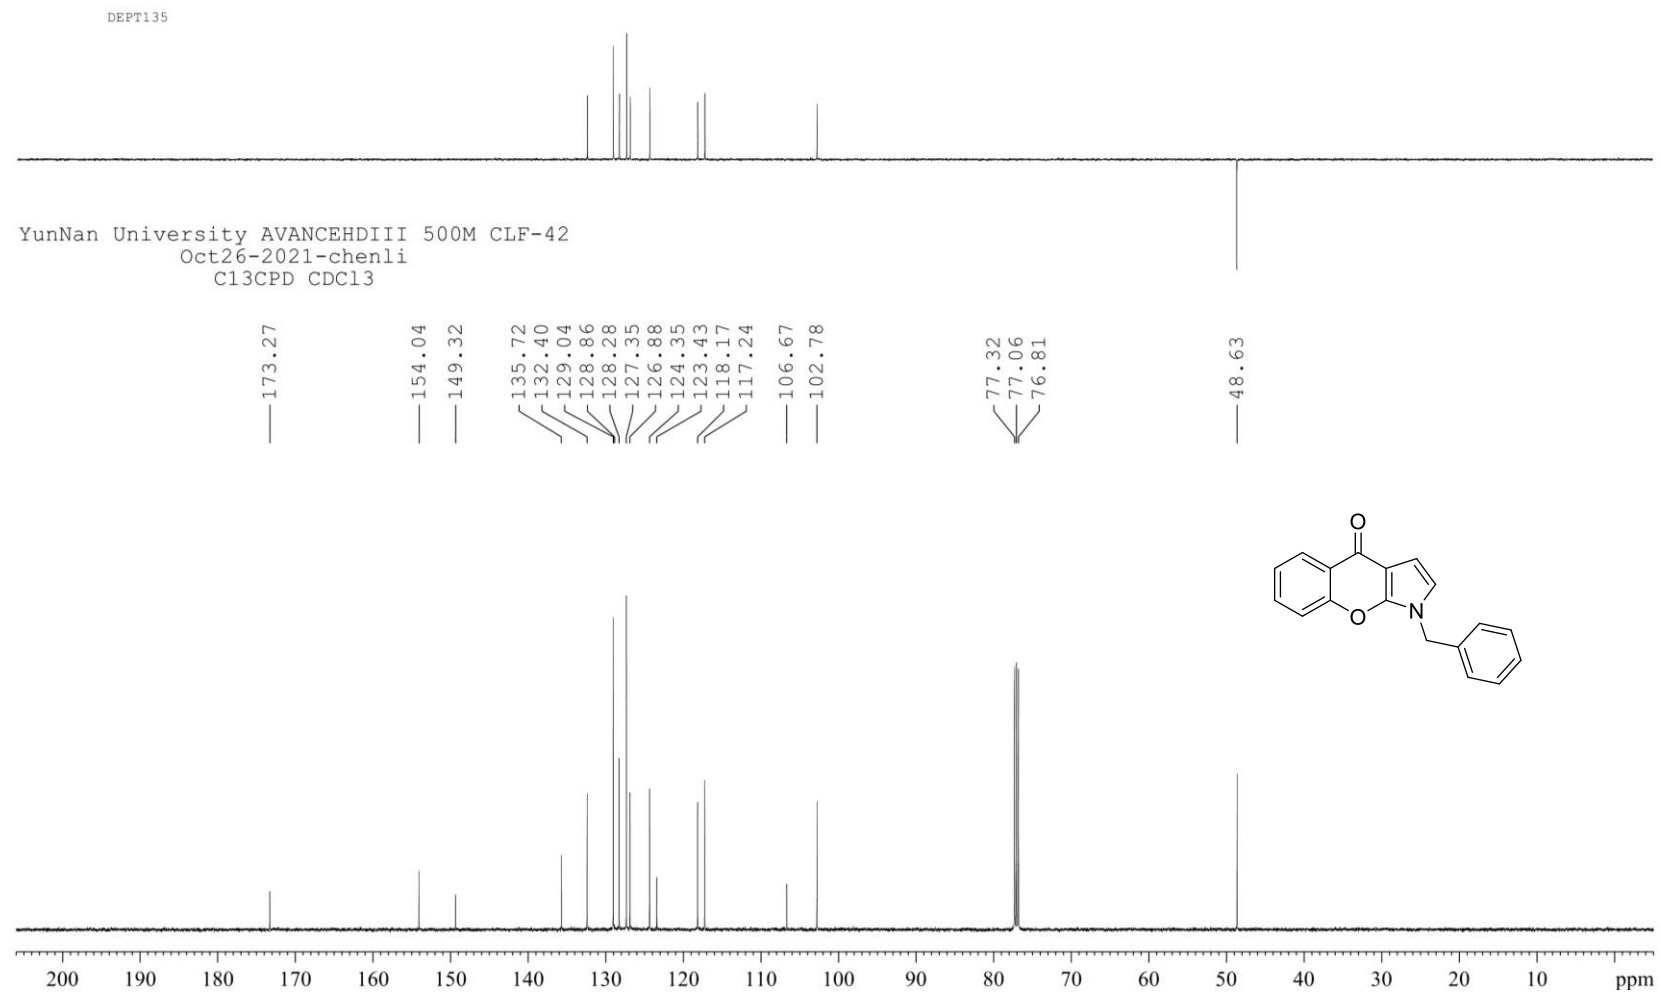

Figure S97.  $^{13}\text{C}$  NMR (125 MHz,  $\text{CDCl}_3$ ) spectra of compound 3i'

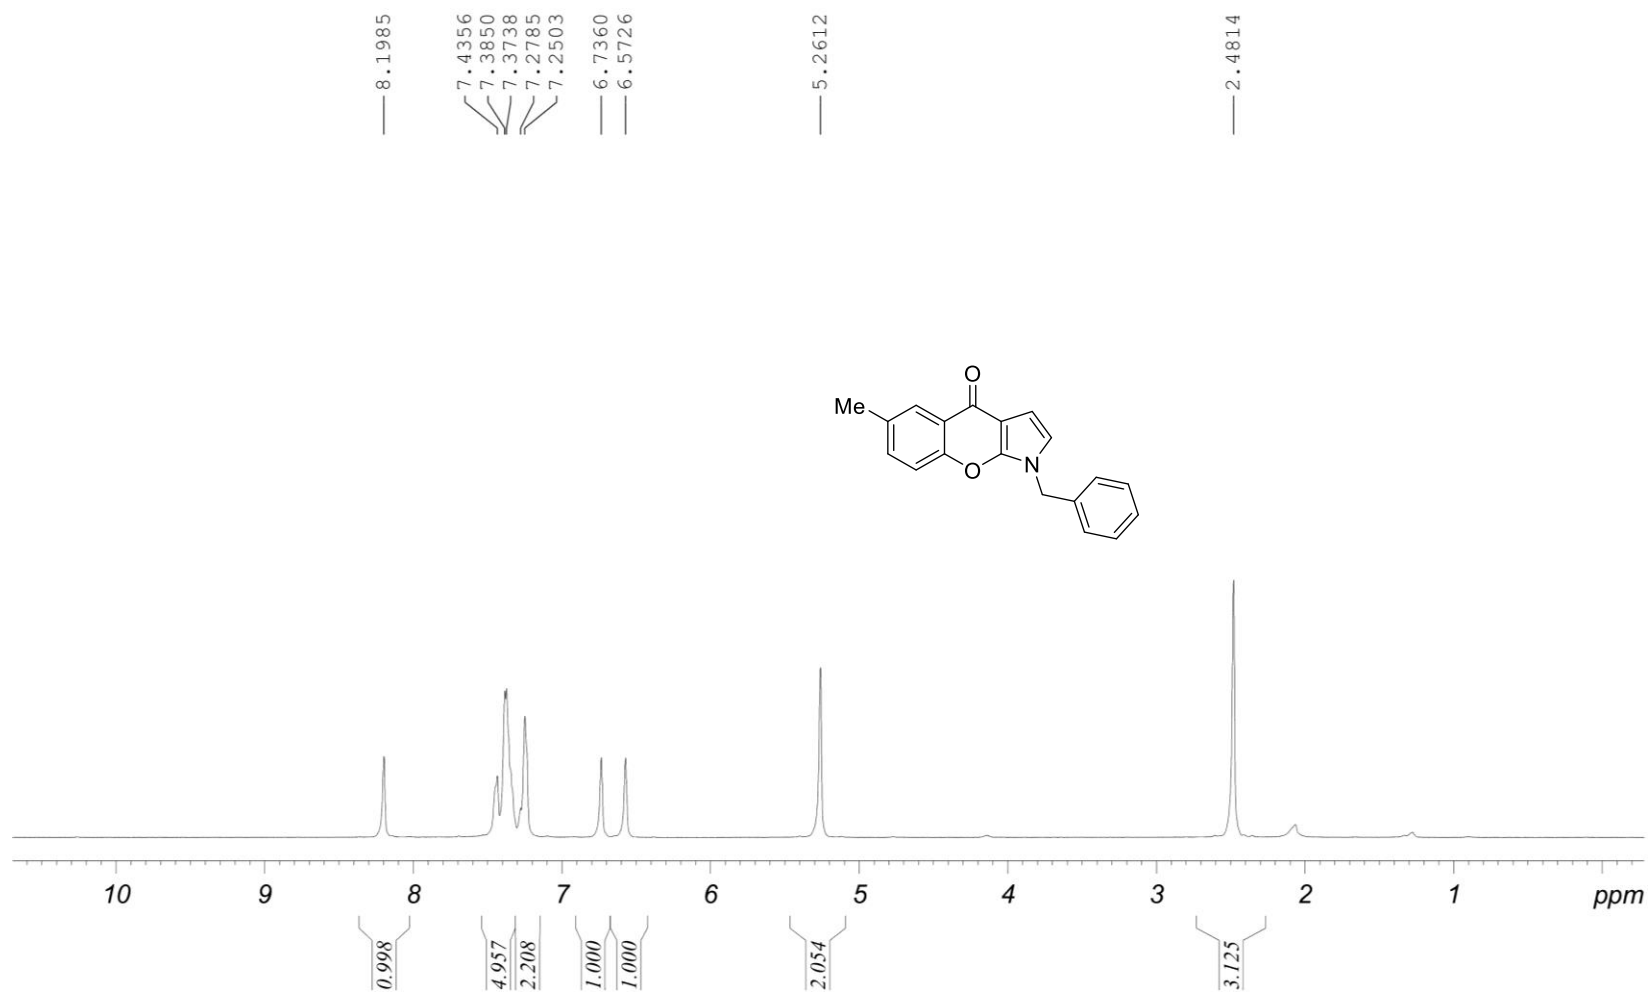

**Figure S98.** <sup>1</sup>H NMR (500 MHz, CDCl<sub>3</sub>) spectra of compound **3j'**

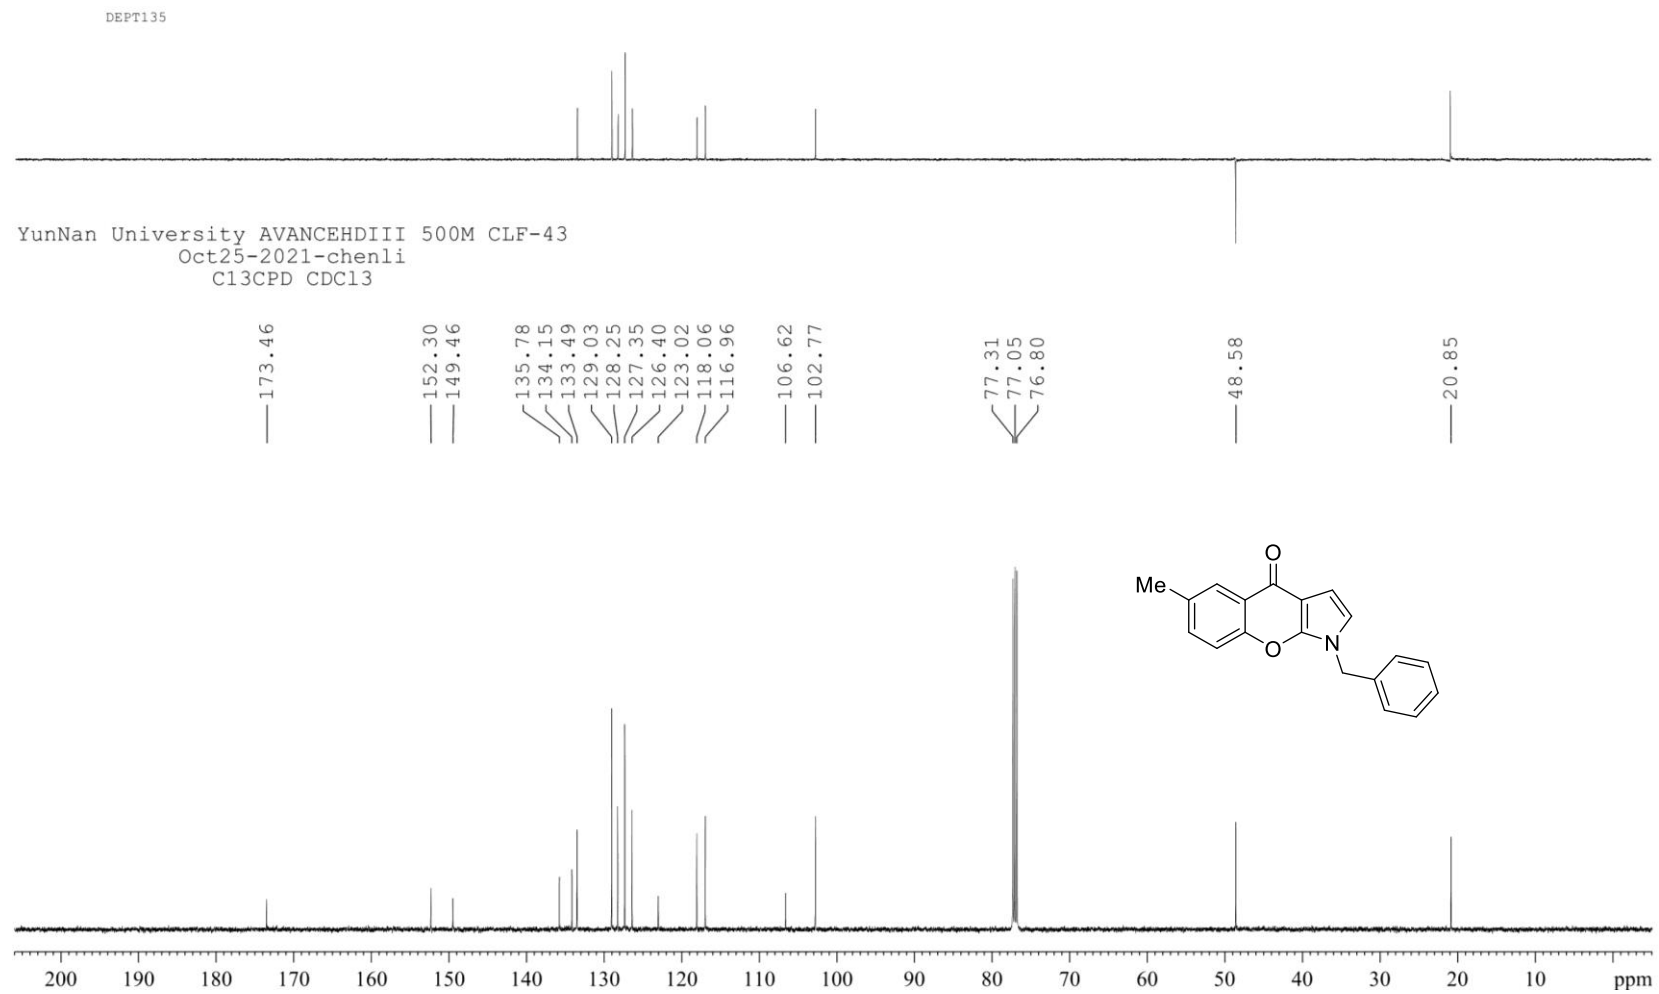

Figure S99. <sup>13</sup>C NMR (125 MHz, CDCl<sub>3</sub>) spectra of compound 3j'

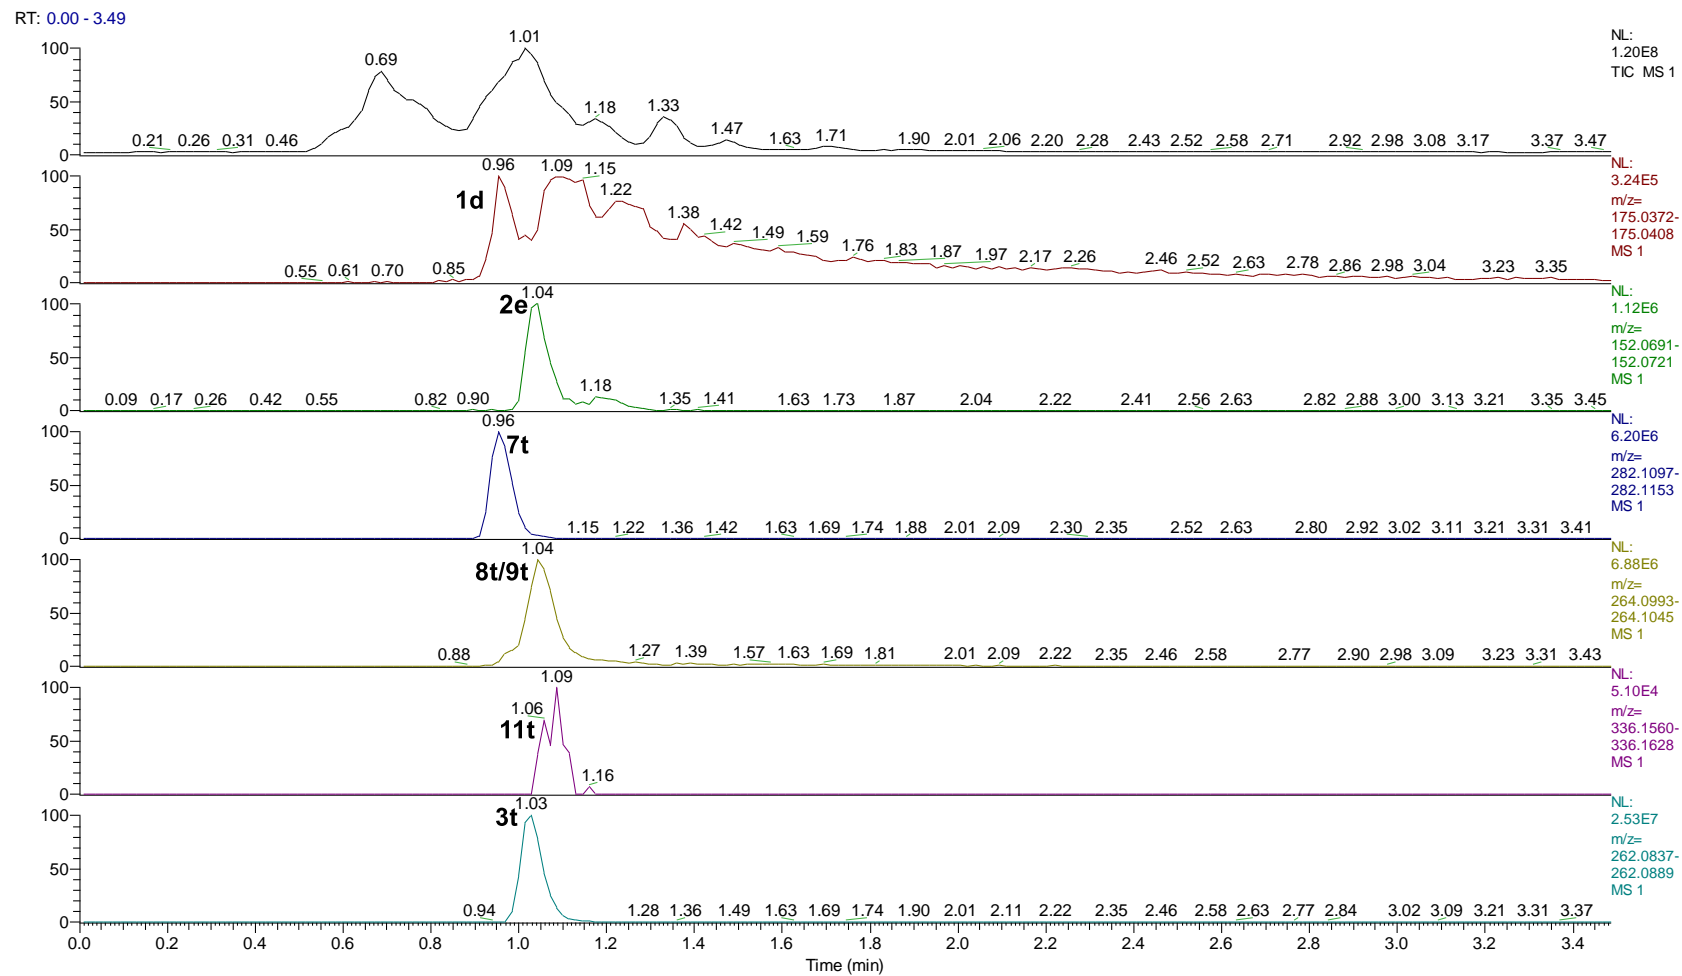

Figure S100. HPLC of the reaction mixture

1 #59 RT: 0.97 AV: 1 NL: 2.87E5  
T: FTMS + c ESI Full ms [50.00-520.00]

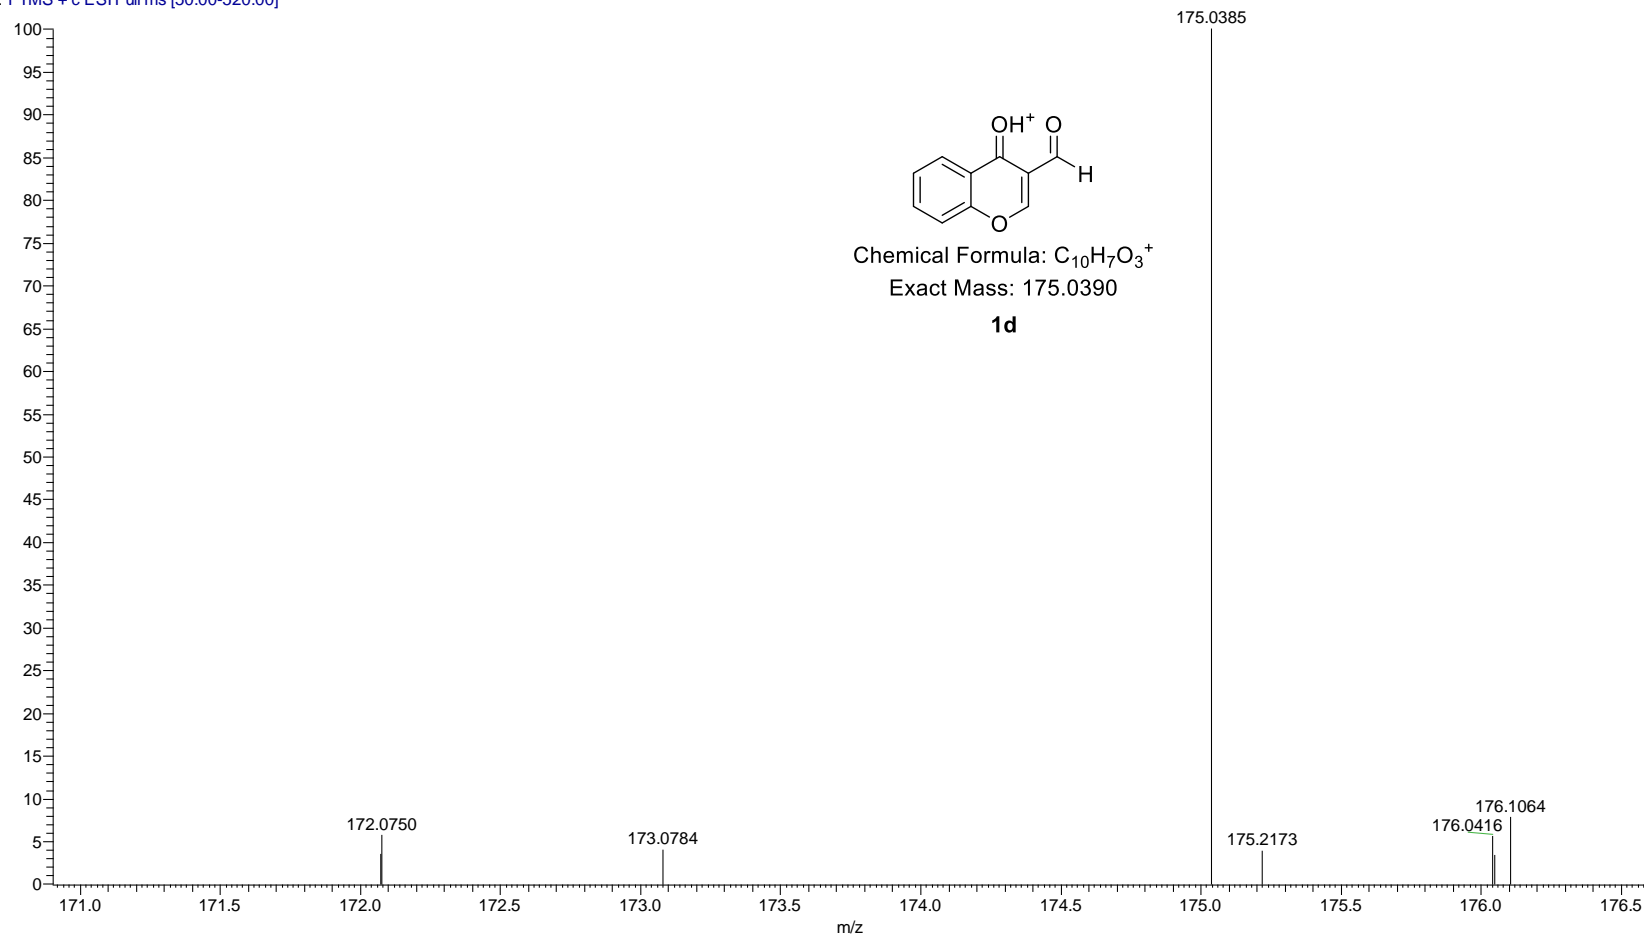

Figure S101. HRMS of intermediate **1d**

1 #63 RT: 1.03 AV: 1 NL: 1.08E6  
T: FTMS + c ESI Full ms [50.00-520.00]

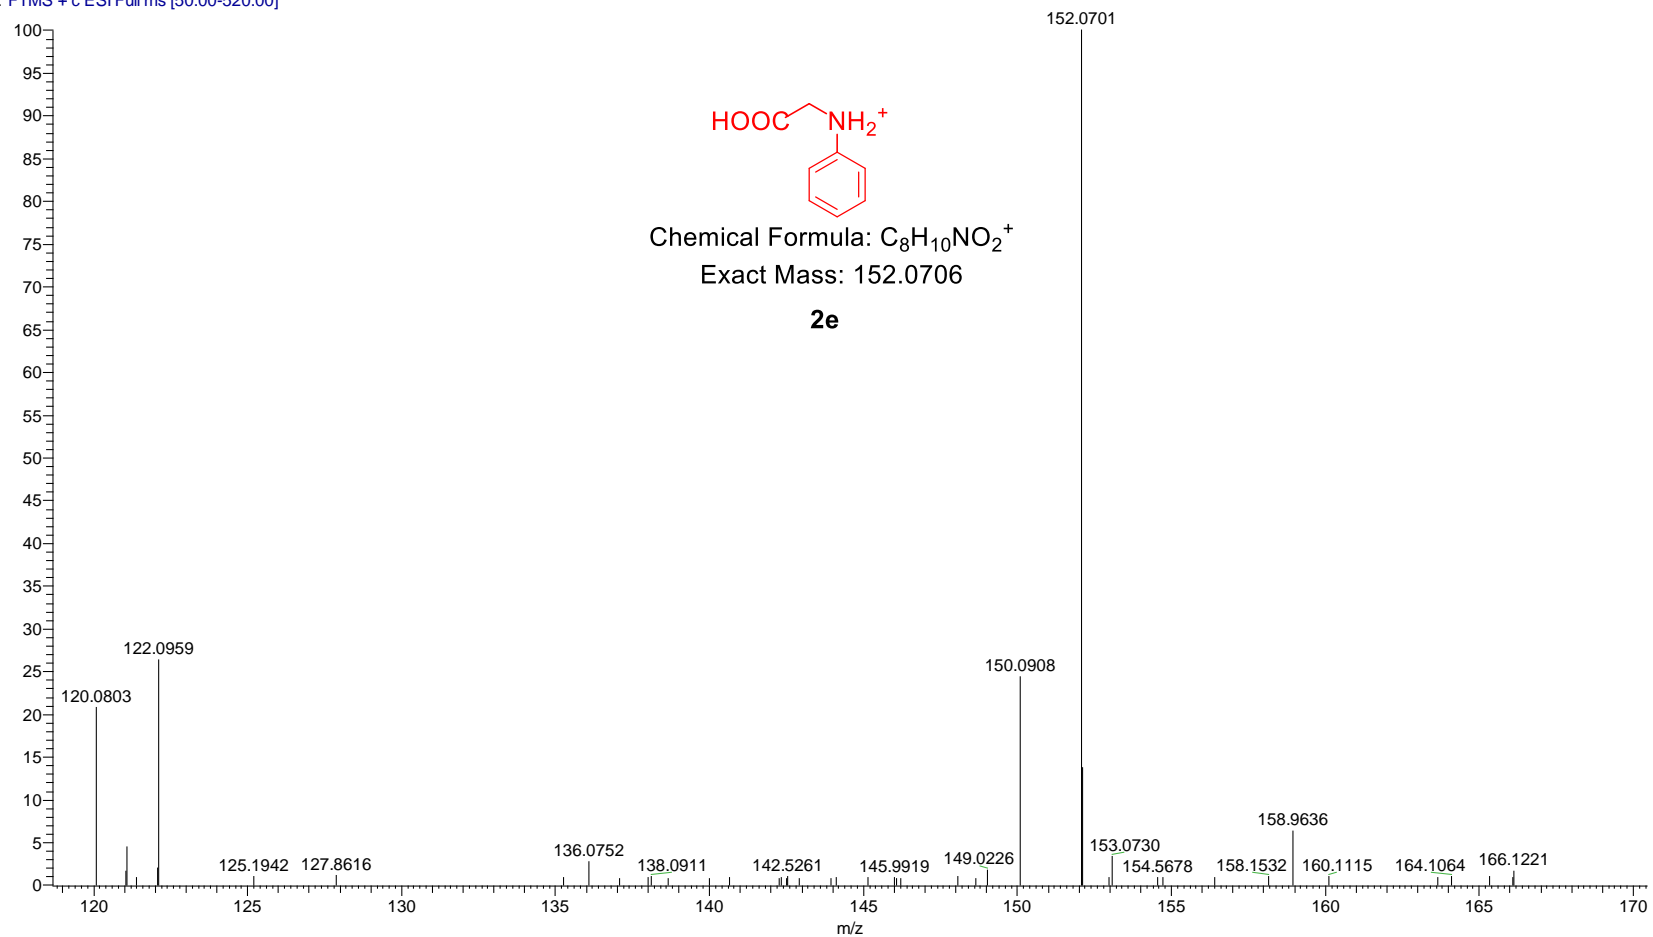

Figure S102. HRMS of intermediate **2e**

1 #55 RT: 0.91 AV: 1 NL: 1.08E4  
T: FTMS + c ESI Full ms [50.00-520.00]

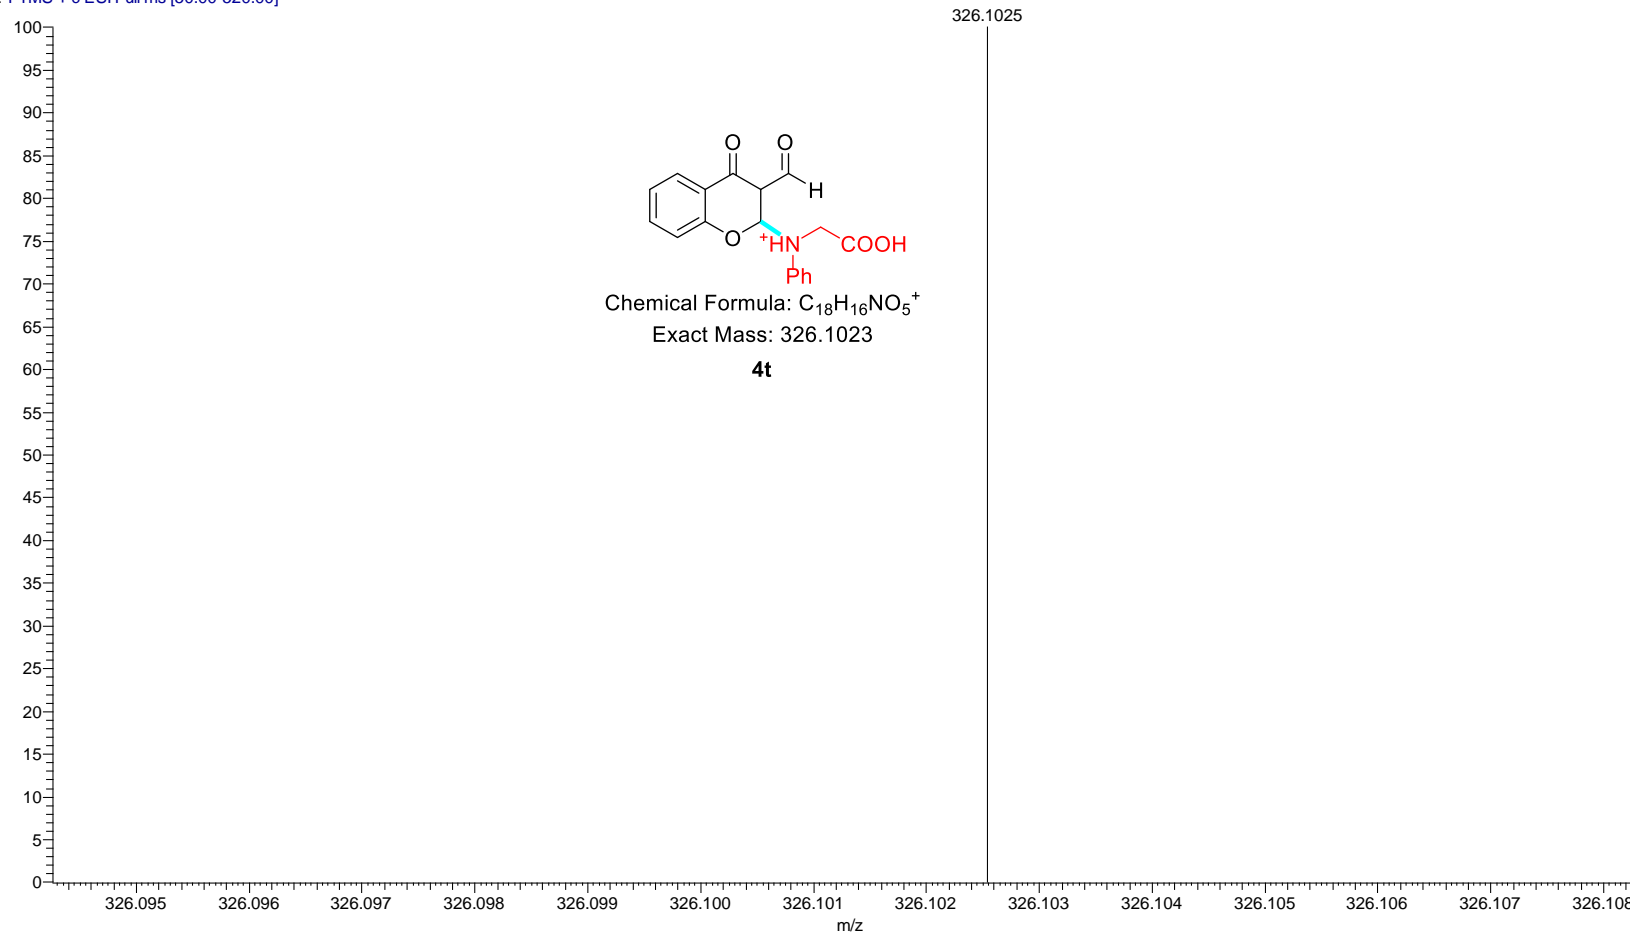

Figure S103. HRMS of intermediate 4t



1 #58 RT: 0.96 AV: 1 NL: 6.20E6  
T: FTMS + c ESI Full ms [50.00-520.00]

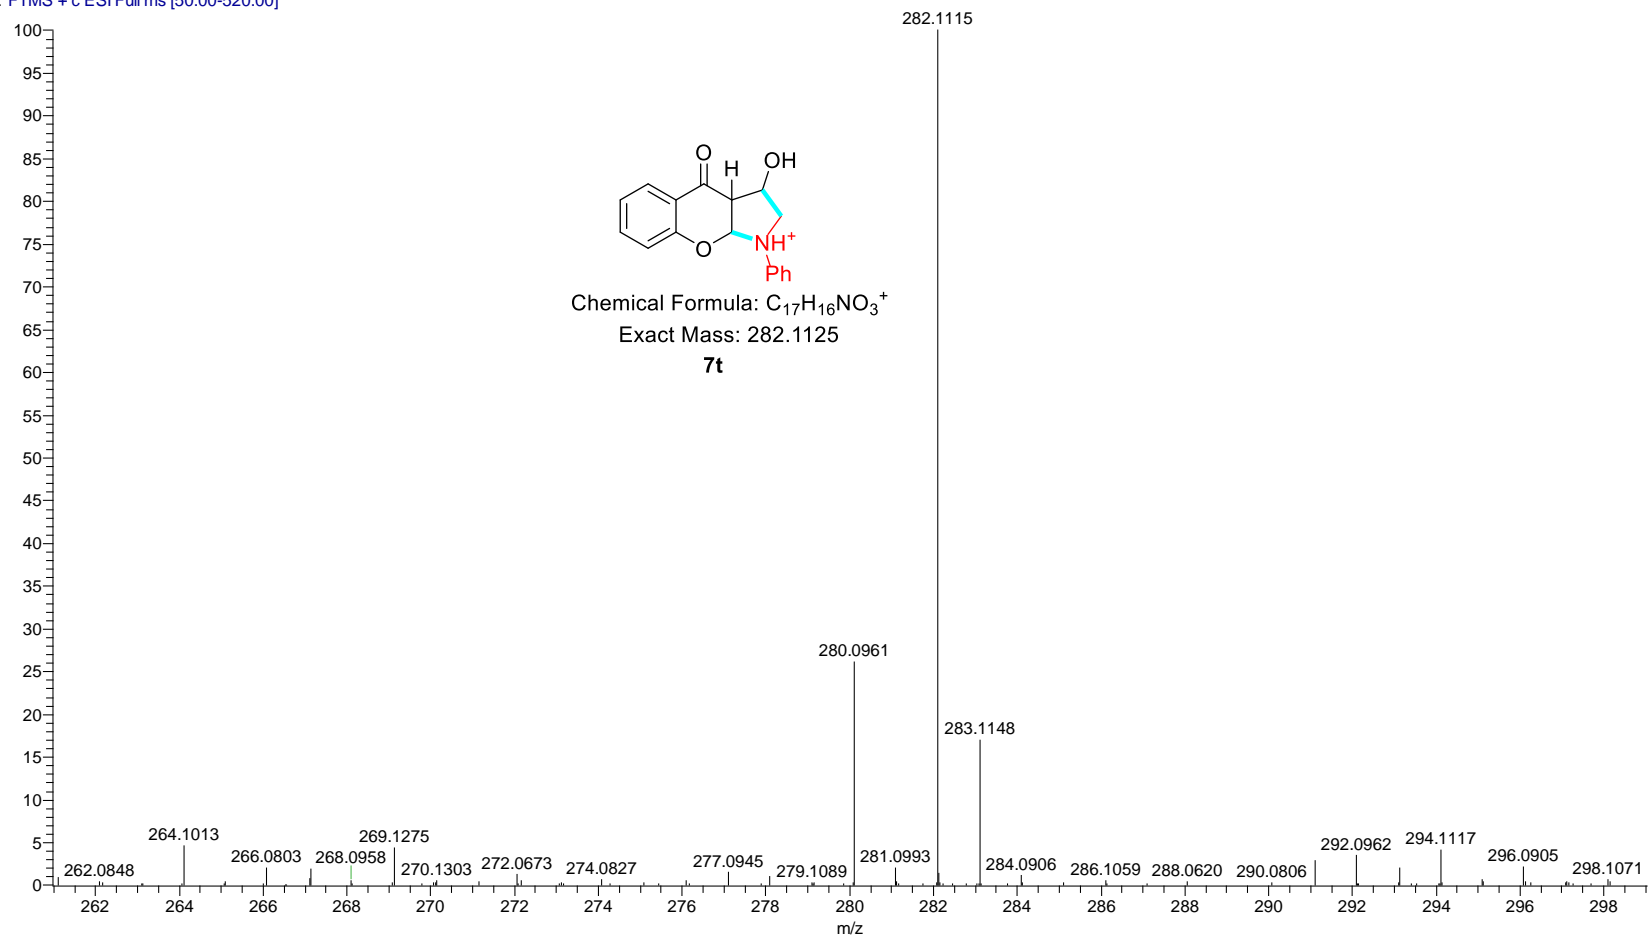

Figure S104. HRMS of intermediate **7t**

1 #58 RT: 0.96 AV: 1 NL: 2.86E5  
T: FTMS + c ESI Full ms [50.00-520.00]

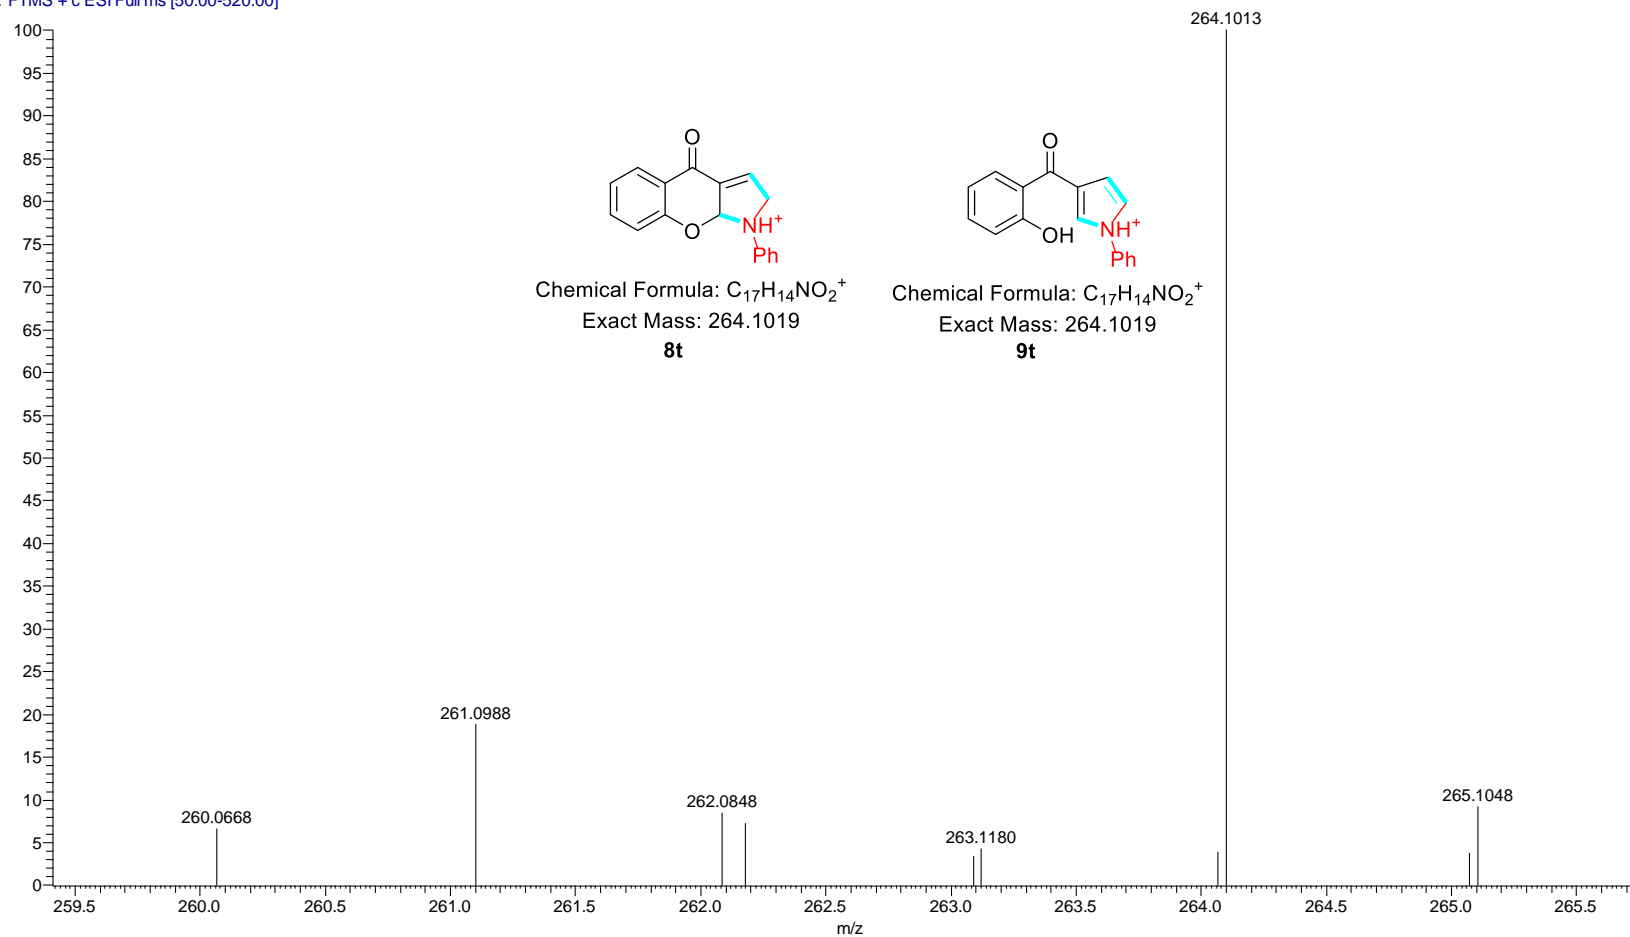

Figure S105. HRMS of intermediate **8t/9t**

1 #65 RT: 1.06 AV: 1 NL: 1.61E4  
T: FTMS + c ESI Full ms [50.00-520.00]

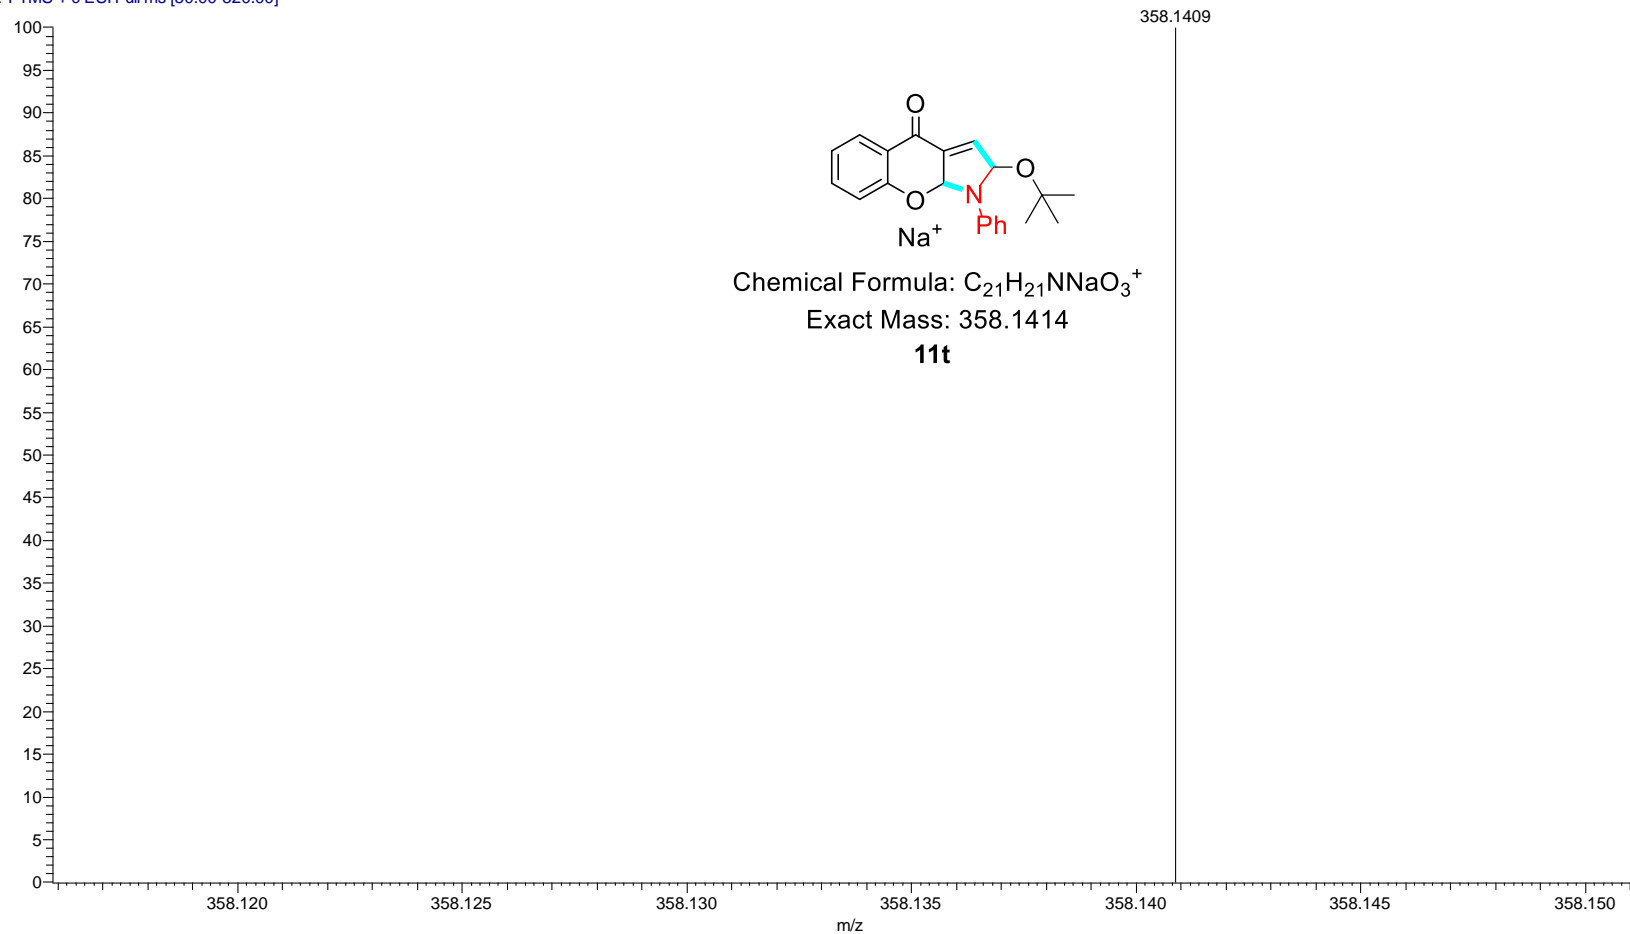

**Figure S106.** HRMS of intermediate **11t**

1 #65 RT: 1.06 AV: 1 NL: 1.17E7  
T: FTMS + c ESI Full ms [50.00-520.00]

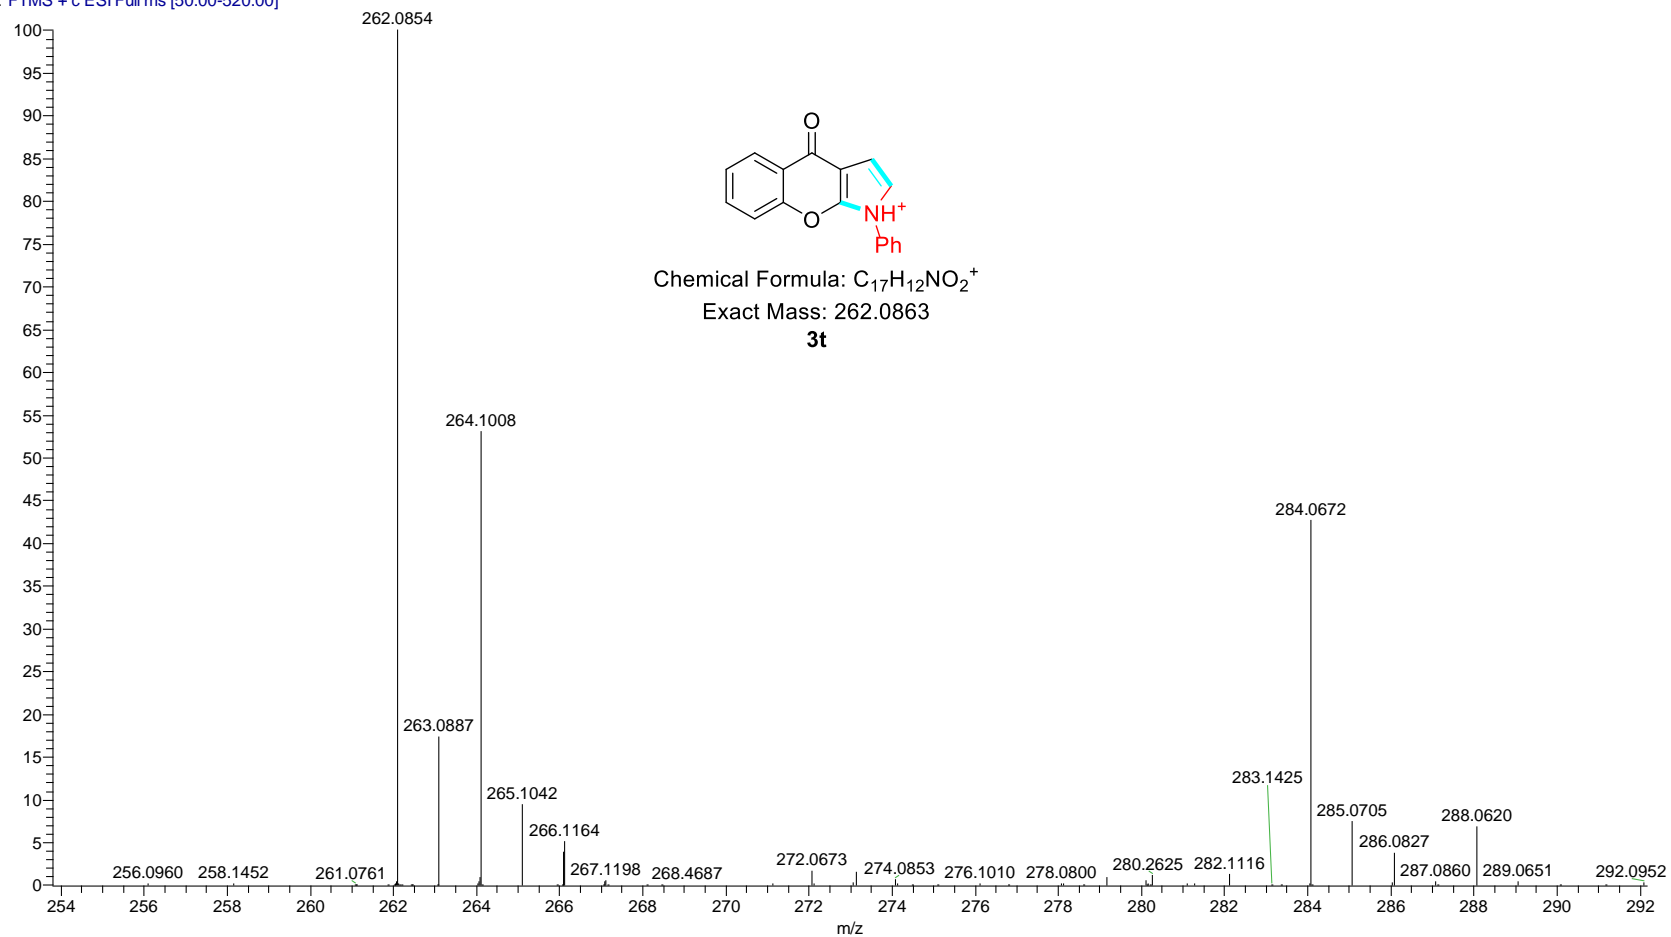

Figure S107. HRMS of compound **3t**

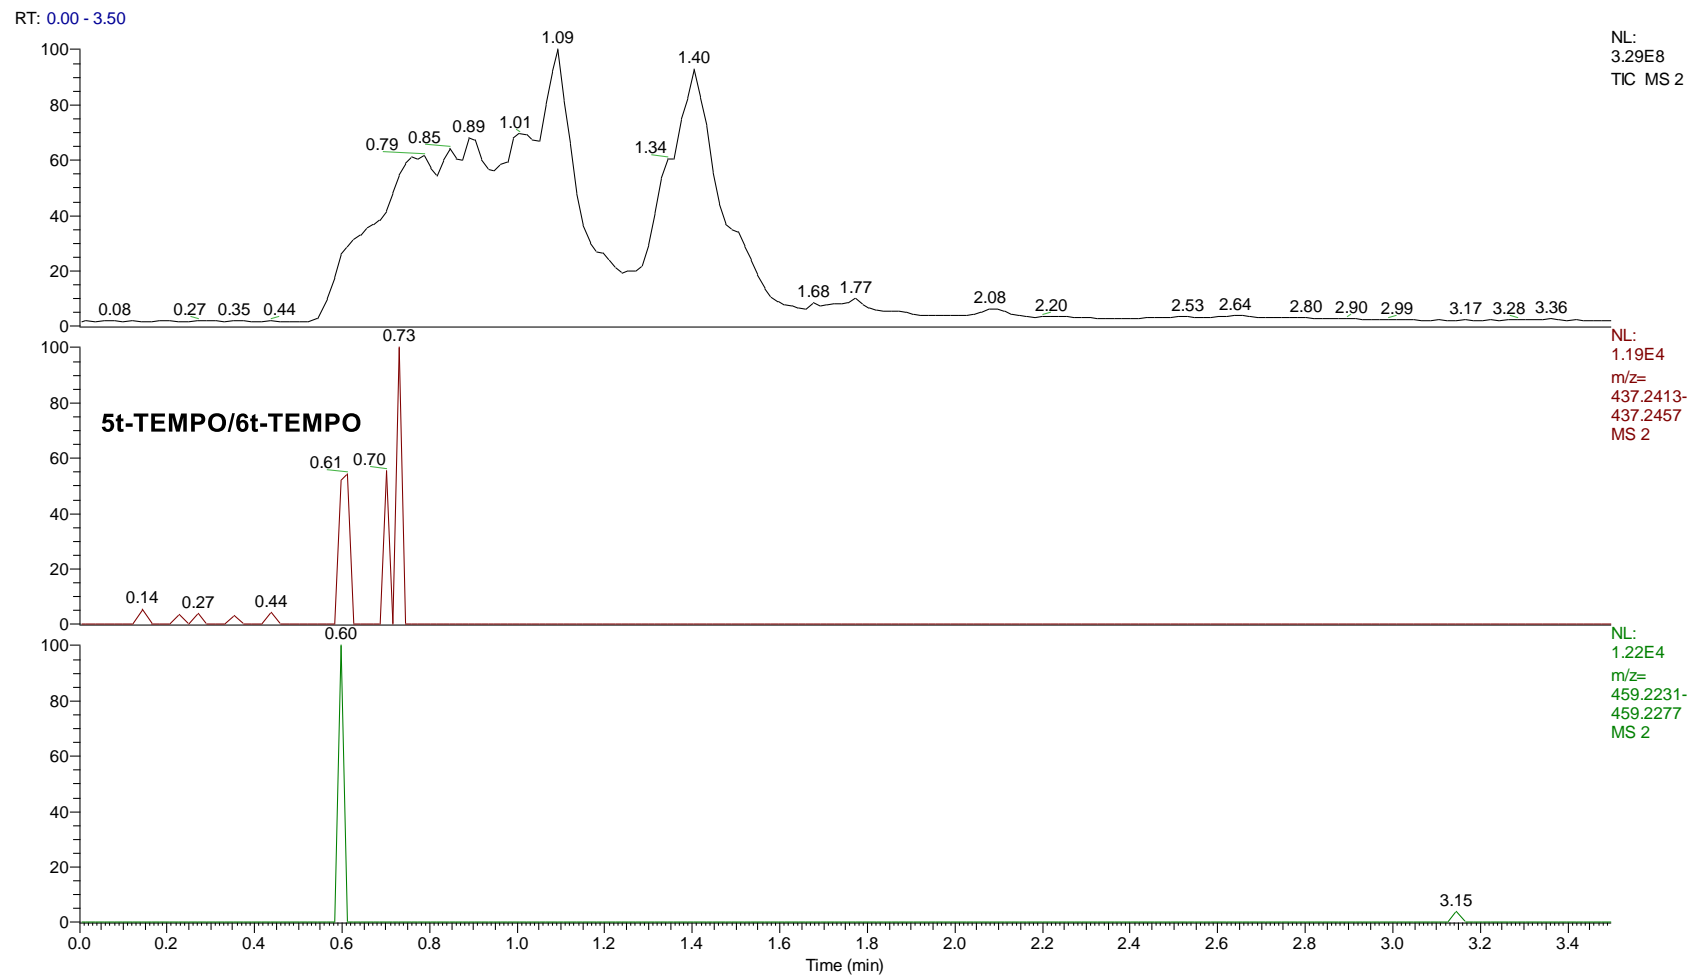

Figure S108. HPLC of the reaction mixture

2 #37 RT: 0.70 AV: 1 NL: 6.56E3  
T: FTMS + c ESI Full ms [100.00-750.00]

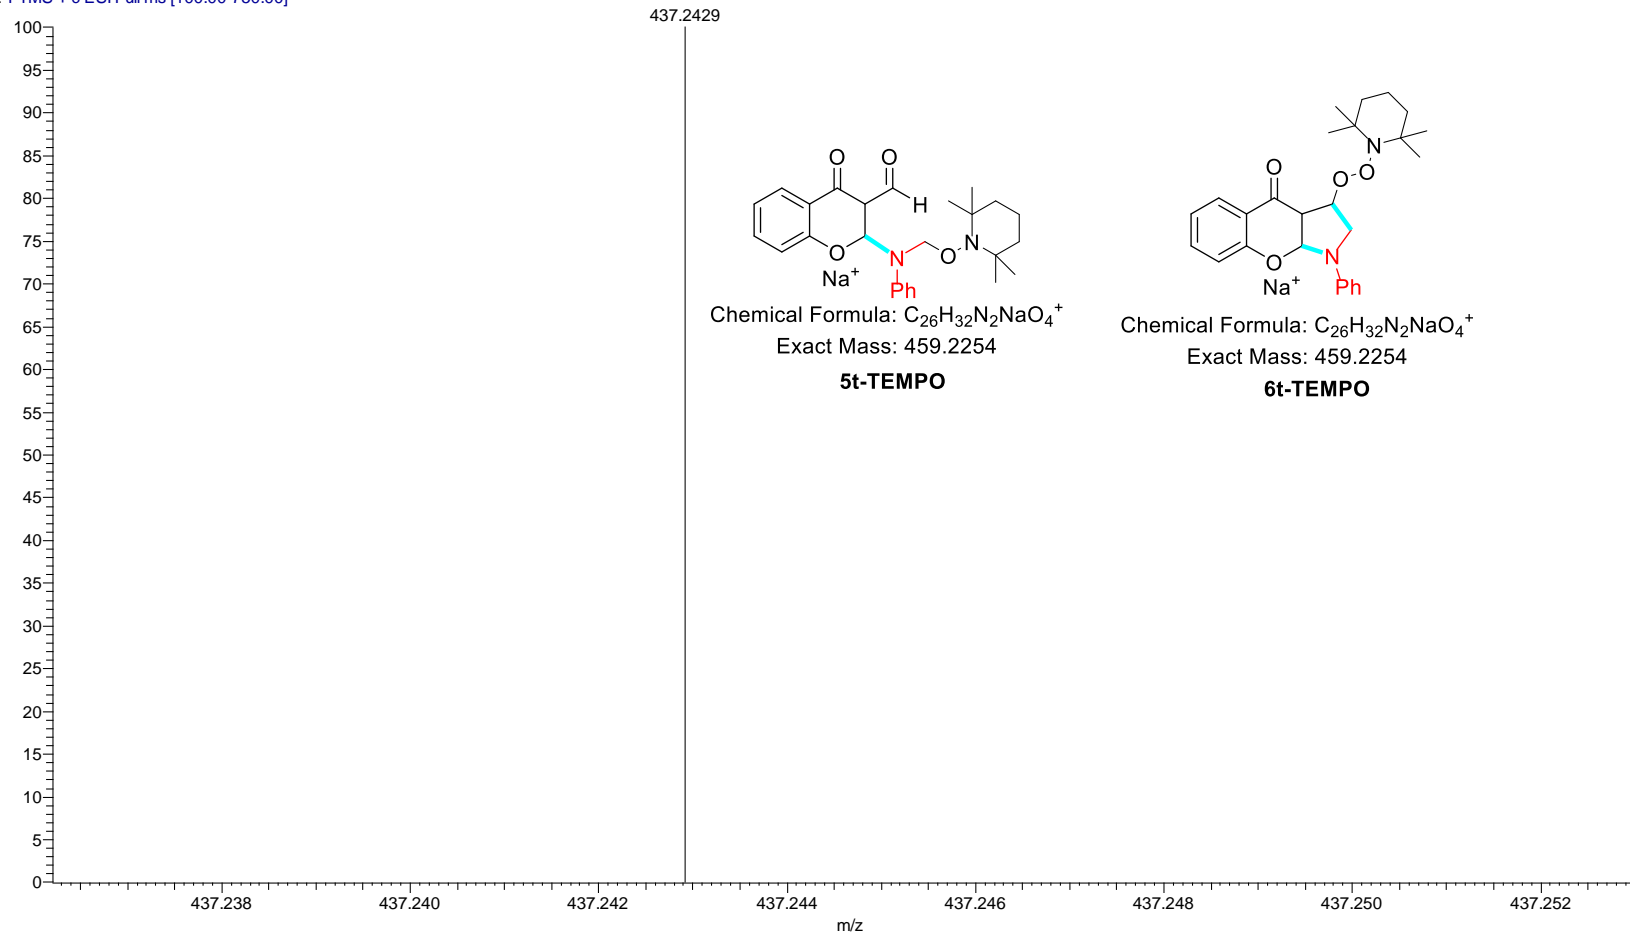

**Figure S109.** HRMS of intermediate **5t-TEMPO/6t-TEMPO**

2 #30 RT: 0.60 AV: 1 NL: 1.22E4  
T: FTMS + c ESI Full ms [100.00-750.00]

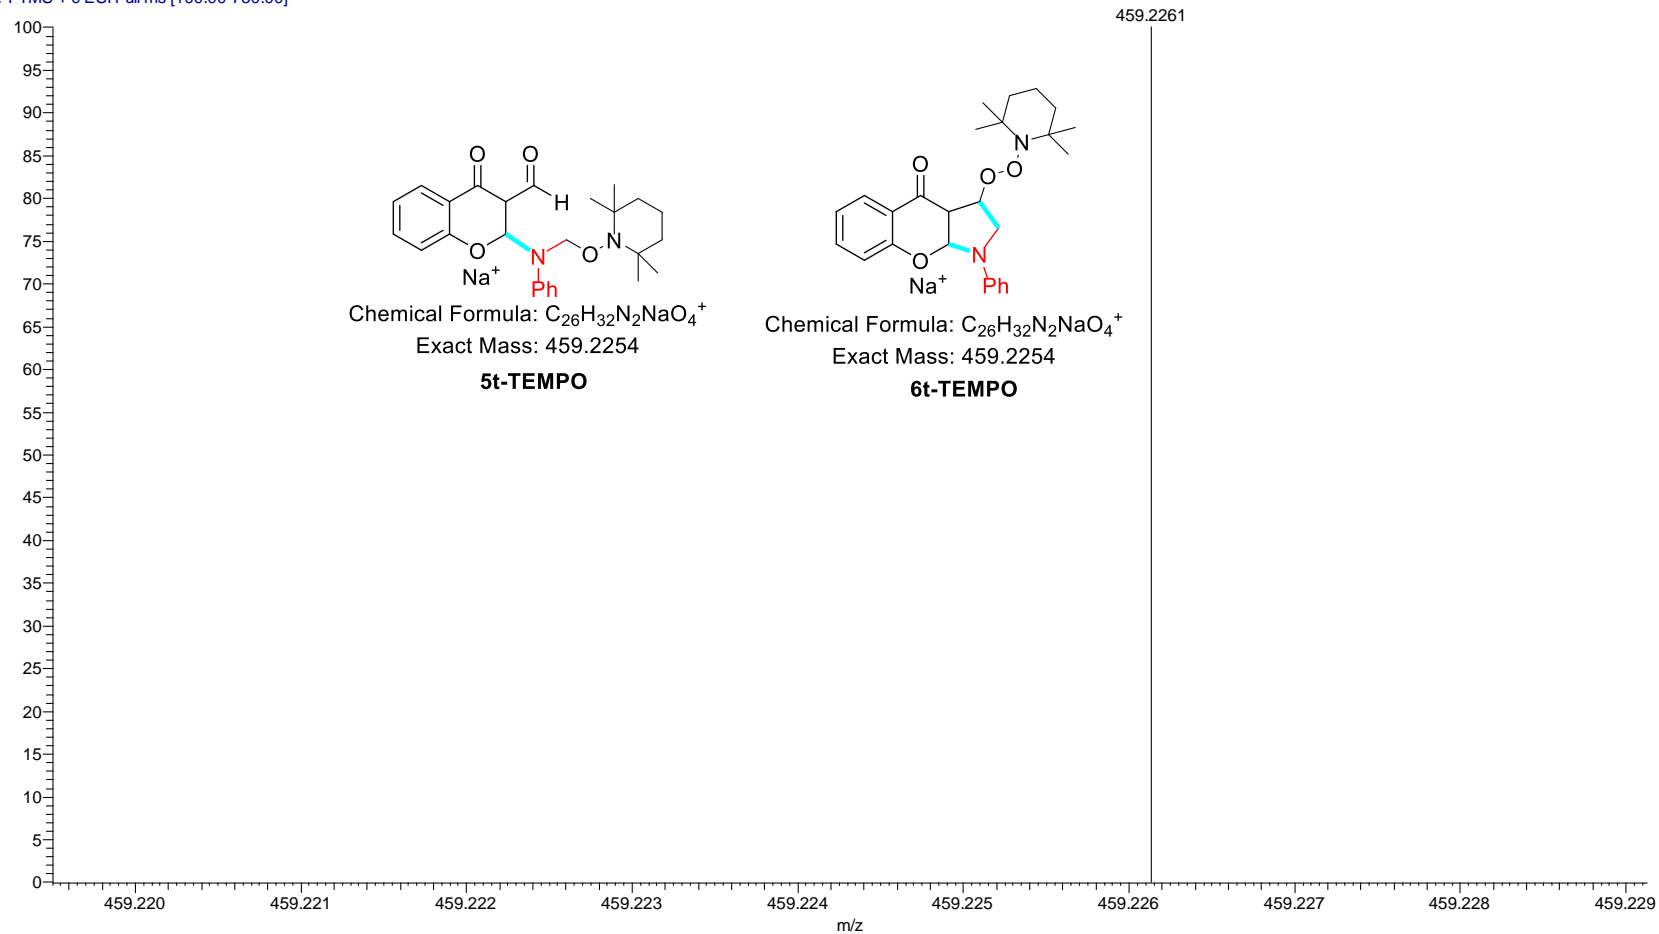

**Figure S110.** HRMS of intermediate **5t-TEMPO/6t-TEMPO**

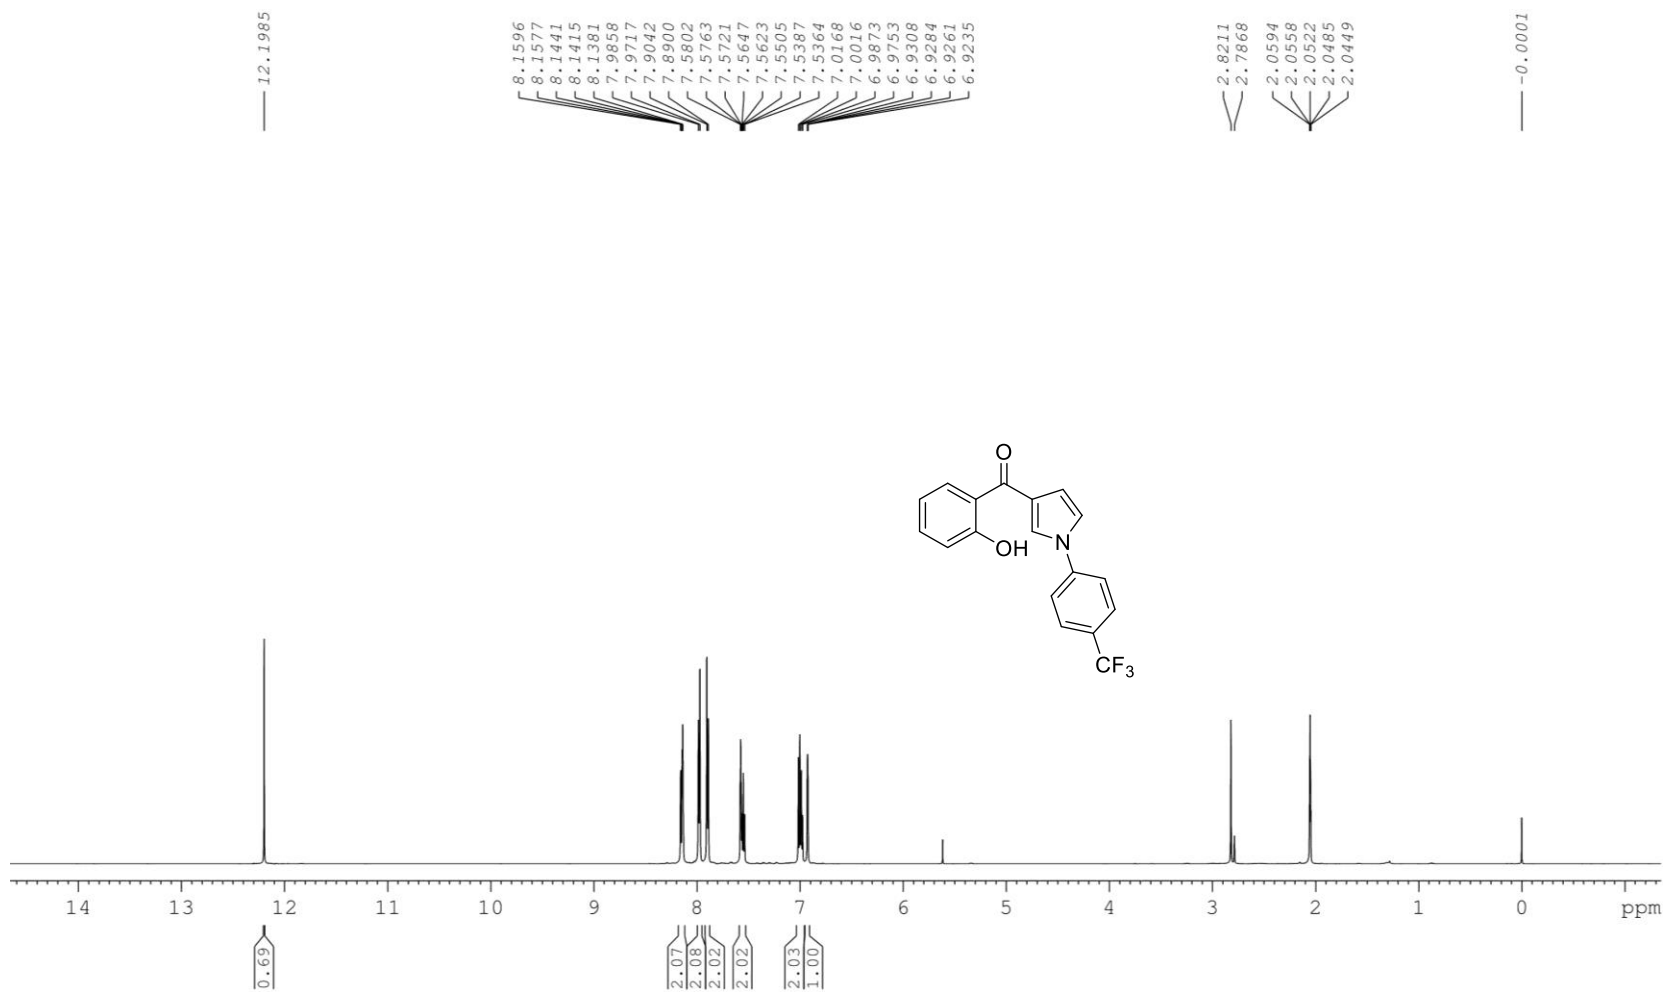

Figure S111. <sup>1</sup>H NMR (600 MHz, Acetone-*d*<sub>6</sub>) spectra of intermediate **9g'**



DEPT135

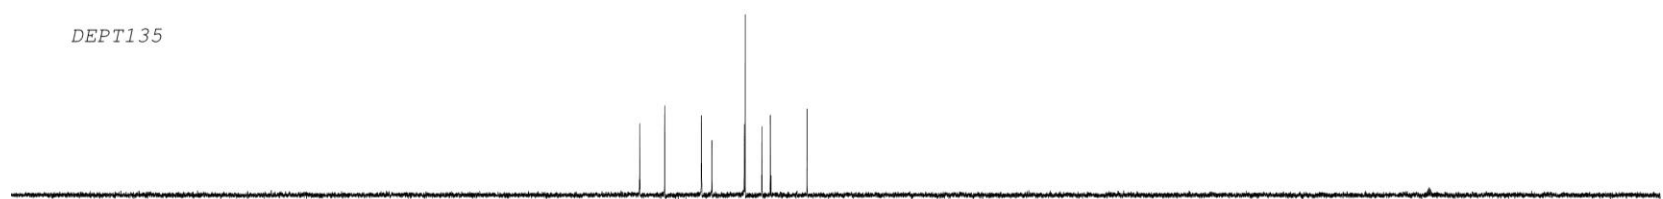

YUNNAN UNIVERSITY ASCEND AVIIIHD600 CLF-34-2-ZJT  
Aug05-2022-chenli  
C13CPD Acetone

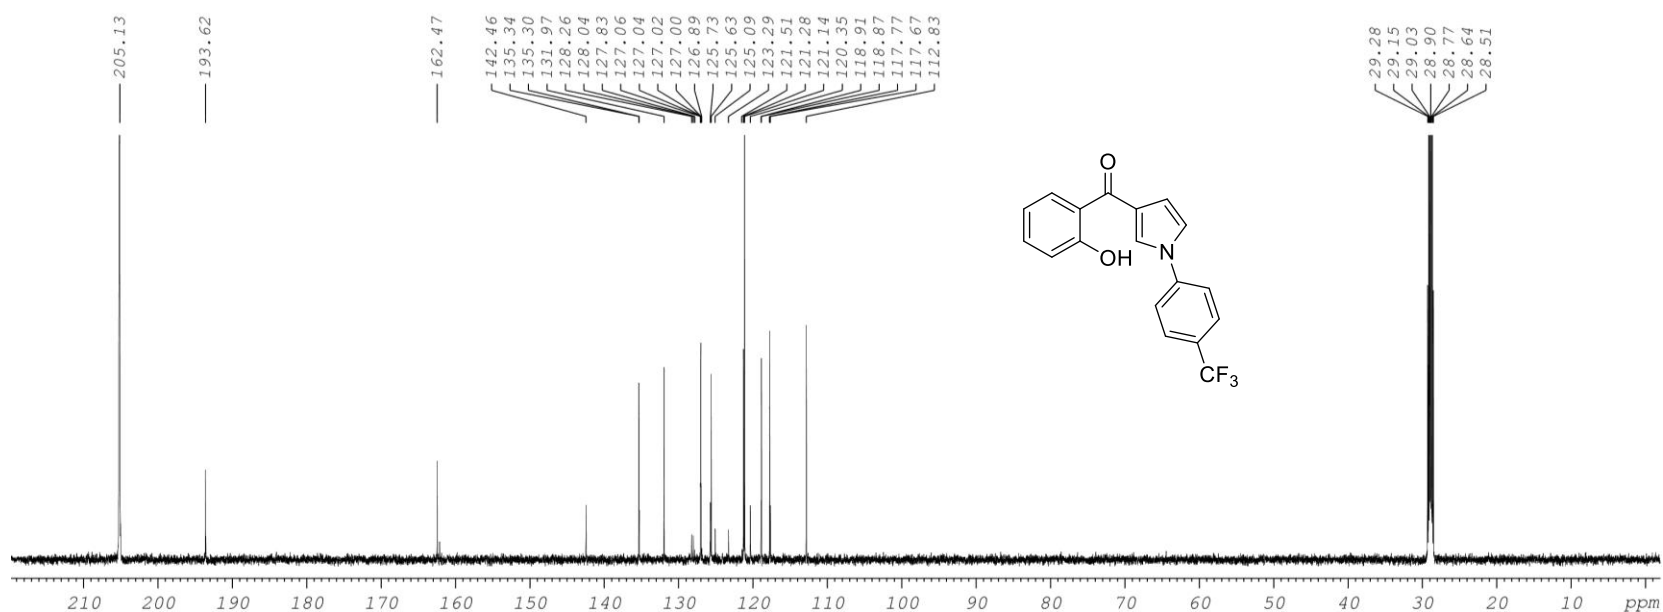

Figure S112. <sup>13</sup>C NMR (150 MHz, Acetone-*d*<sub>6</sub>) spectra of intermediate **9g'**

YUNNAN UNIVERSITY ASCEND AVIIIHD600 CLF-34-2-ZJT  
Aug05-2022-chenli  
F19CPD Acetone

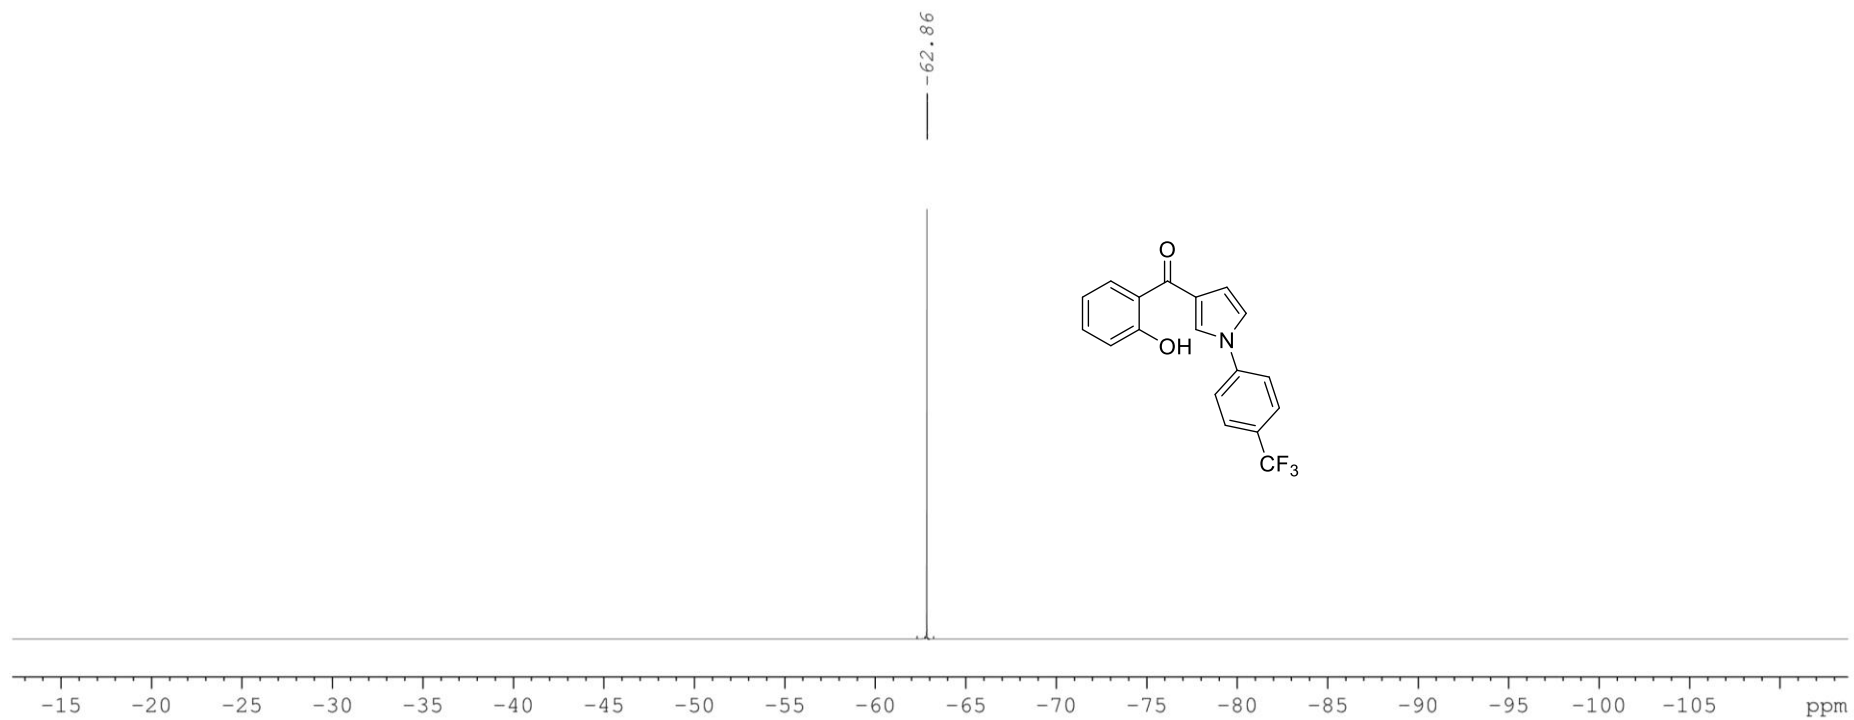

**Figure S113.**  $^{19}\text{F}$  NMR (564 MHz, Acetone- $d_6$ ) spectra of intermediate **9g'**

## References and Notes

1. C. Zhou, M. Li, J.-W. Sun, J. Cheng and S. Sun, Photoredox-Catalyzed  $\alpha$ -Aminomethyl Carboxylation of Styrenes with Sodium Glycinates: Synthesis of  $\gamma$ -Amino Acids and  $\gamma$ -Lactams. *Org. Lett.* 2021, **23**, 2895.
2. CCDC 2181906 contains the supplementary crystallographic data for compounds **3d'**. These data can be obtained free of charge from The Cambridge Crystallographic Data Center via [www.ccdc.cam.ac.uk/data\\_request/cif](http://www.ccdc.cam.ac.uk/data_request/cif)
